# Supplementary material
Source: publisher figshare collection journal article supplement (https://diabetesjournals.figshare.com/articles/dataset/_/13073054)
Supplement: Supplementary file 1 [file 1]

| <b>SUPPLEMENTAL TABLES</b>                                                                                                  | <b>Page</b> |
|-----------------------------------------------------------------------------------------------------------------------------|-------------|
| <b>Supplemental Table 1. Genetic Variants Selected to Generate Pregnancy Clusters</b>                                       | <b>2</b>    |
| <b>Supplemental Table 2. Associations Between Genetic Variants and Traits in Gen3G</b>                                      | <b>11</b>   |
| <b>Supplemental Table 3A. Associations Between <i>Udler Cluster</i> Polygenic Scores and Traits in HAPO Sub-Cohorts</b>     | <b>115</b>  |
| <b>Supplemental Table 3B. Associations Between <i>Pregnancy Cluster</i> Polygenic Scores and Traits in HAPO Sub-Cohorts</b> | <b>116</b>  |
| <b>Supplemental Table 4. Characteristics of Partners Biobank Participants in the T2D Case-Control Set</b>                   | <b>117</b>  |

## Supplemental Table 1. Genetic Variants Selected to Generate Pregnancy Clusters

Grey shading indicates that the variant was used in the clustering procedure based on nominal association with a trait in Gen3G; RAF=Risk Allele Frequency

| Locus               | Variant     | Risk allele | Other allele | Reference RAF (%) | Gen3G RAF (%) | HAPO RAF (%) | MGH <sup>2</sup> RAF (%) |
|---------------------|-------------|-------------|--------------|-------------------|---------------|--------------|--------------------------|
| <i>MACF1</i>        | rs3768321   | T           | G            | 20.0              | 19.6          | 18.8         | 15.2                     |
| <i>FAF1</i>         | rs58432198  | C           | T            | 88.1              | 88.5          | 87.8         | 91.1                     |
| <i>PATJ</i>         | rs12140153  | G           | T            | 90.5              | 91.6          | 92.5         | 94.5                     |
| <i>PTGFRN</i>       | rs1127215   | C           | T            | 58.4              | 60.9          | 57.2         | 52.6                     |
| <i>NOTCH2</i>       | rs1493694   | T           | C            | 10.9              | 9.89          | 10.8         | 14.7                     |
| <i>SEC16B</i>       | rs539515    | C           | A            | 19.8              | 17.7          | 18.6         | 19.8                     |
| <i>DSTYK</i>        | rs12048743  | G           | C            | 44.2              | 41.8          | 43.8         | 53.3                     |
| <i>SRGAP2</i>       | rs9430095   | C           | G            | 49.4              | 48.1          | 48.9         | 55.6                     |
| <i>PROX1</i>        | rs340874    | C           | T            | 55.6              | 57.4          | 56.2         | 44.7                     |
| <i>LYPLAL1</i>      | rs2820446   | C           | G            | 70.6              | 70.7          | 69.8         | 67.3                     |
| <i>ABCB10</i>       | rs348330    | G           | A            | 36.1              | 35.5          | 38.6         | 46.2                     |
| <i>GNG4</i>         | rs291367    | G           | A            | 63.2              | 64.9          | 62.2         | 65.3                     |
| <i>FAM49A</i>       | rs11680058  | A           | G            | 86.3              | 85.6          | 88.9         | 77.8                     |
| <i>DTNB</i>         | rs17802463  | G           | T            | 73.1              | 69.2          | 73.1         | 76.6                     |
| <i>GCKR</i>         | rs1260326   | C           | T            | 60.7              | 52.9          | 60.2         | 61.9                     |
| <i>THADA</i>        | rs80147536  | A           | T            | 90.4              | 89.4          | 91.1         | 93.8                     |
| <i>BNIP1</i>        | rs6545714   | G           | A            | 39.2              | 40.3          | 39.3         | 38.1                     |
| <i>BCL11A</i>       | rs243024    | A           | G            | 46.0              | 44.0          | 46.1         | 50.1                     |
| <i>CEP68</i>        | rs2249105   | A           | G            | 63.4              | 61.5          | 59.9         | 60.6                     |
| <i>GLI2</i>         | rs11688682  | G           | C            | 72.8              | 76.4          | 74.0         | 80.3                     |
| <i>PABPC1P2</i>     | rs35999103  | T           | C            | 15.5              | 18.1          | 14.4         | 19.2                     |
| <i>CYTIP</i>        | rs13426680  | A           | G            | 93.7              | 93.4          | 94.2         | 90.0                     |
| <i>RBMS1</i>        | rs3772071   | T           | C            | 71.4              | 69.9          | 70.5         | 70.8                     |
| <i>GRB14/COBLL1</i> | rs10195252  | T           | C            | 58.6              | 59.5          | 60.0         | 63.3                     |
| <i>G6PC2</i>        | rs1402837   | T           | C            | 23.2              | 23.4          | 23.3         | 22.9                     |
| <i>CRYBA2</i>       | rs113414093 | A           | G            | 5.14              | 3.29          | 3.40         | 1.96                     |
| <i>IRS1</i>         | rs2972144   | G           | A            | 63.9              | 63.8          | 65.2         | 71.9                     |
| <i>PPARG</i>        | rs11709077  | G           | A            | 87.7              | 89.6          | 88.5         | 89.5                     |

## Supplemental Table 1. Genetic Variants Selected to Generate Pregnancy Clusters

Grey shading indicates that the variant was used in the clustering procedure based on nominal association with a trait in Gen3G; RAF=Risk Allele Frequency

| Locus           | Variant    | Risk allele | Other allele | Reference RAF (%) | Gen3G RAF (%) | HAPO RAF (%) | MGH <sup>2</sup> RAF (%) |
|-----------------|------------|-------------|--------------|-------------------|---------------|--------------|--------------------------|
| <i>UBE2E2</i>   | rs35352848 | T           | C            | 78.8              | 79.1          | 80.7         | 81.6                     |
| <i>KIF9</i>     | rs11926707 | C           | T            | 62.6              | 60.5          | 61.7         | 62.5                     |
| <i>RBM6</i>     | rs4688760  | T           | C            | 68.4              | 70.9          | 68.4         | 62.1                     |
| <i>RFT1</i>     | rs2581787  | T           | G            | 56.3              | 55.6          | 57.9         | 57.6                     |
| <i>PSMD6</i>    | rs3774723  | G           | A            | 84.4              | 84.4          | 84.3         | 81.2                     |
| <i>ADAMTS9</i>  | rs9860730  | A           | G            | 70.4              | 67.0          | 67.9         | 50.2                     |
| <i>SHQ1</i>     | rs13085136 | C           | T            | 92.8              | 94.1          | 93.7         | 93.7                     |
| <i>ROBO2</i>    | rs2272163  | C           | A            | 61.8              | 60.5          | 62.1         | 60.9                     |
| <i>ADCY5</i>    | rs11708067 | A           | G            | 77.2              | 79.0          | 77.9         | 77.5                     |
| <i>SLC12A8</i>  | rs649961   | T           | C            | 46.5              | 45.0          | 47.1         | 41.1                     |
| <i>TMCC1</i>    | rs9828772  | C           | G            | 89.8              | 91.5          | 89.5         | 90.7                     |
| <i>TSC22D2</i>  | rs62271373 | A           | T            | 5.53              | 8.25          | 6.39         | 4.90                     |
| <i>MBNL1</i>    | rs13065698 | A           | G            | 60.0              | 60.2          | 60.5         | 54.1                     |
| <i>EGFEM1P</i>  | rs7629630  | A           | T            | 85.7              | 85.0          | 85.0         | 84.3                     |
| <i>SLC2A2</i>   | rs9873618  | G           | A            | 71.0              | 67.1          | 70.8         | 68.4                     |
| <i>ABCC5</i>    | rs2872246  | A           | C            | 45.4              | 47.4          | 44.5         | 42.2                     |
| <i>IGF2BP2</i>  | rs6780171  | A           | T            | 31.4              | 30.5          | 32.3         | 30.8                     |
| <i>ST6GAL1</i>  | rs3887925  | T           | C            | 54.7              | 54.7          | 53.6         | 46.6                     |
| <i>LPP</i>      | rs4686471  | C           | T            | 61.0              | 64.4          | 62.1         | 69.7                     |
| <i>MAEA</i>     | rs56337234 | C           | T            | 50.3              | 55.1          | 49.1         | 49.8                     |
| <i>HTT</i>      | rs362307   | T           | C            | 7.68              | 6.63          | 6.79         | 7.92                     |
| <i>WFS1</i>     | rs10937721 | C           | G            | 58.8              | 57.7          | 63.0         | 66.7                     |
| <i>LCORL</i>    | rs12640250 | C           | A            | 71.5              | 72.9          | 72.3         | 68.9                     |
| <i>GNPDA2</i>   | rs10938398 | A           | G            | 42.9              | 41.6          | 43.5         | 39.7                     |
| <i>USP46</i>    | rs2102278  | G           | A            | 31.9              | 31.2          | 32.5         | 36.8                     |
| <i>SCD5</i>     | rs12642790 | A           | G            | 33.8              | 34.5          | 33.2         | 32.0                     |
| <i>FAM13A</i>   | rs1903002  | G           | C            | 50.1              | 49.8          | 51.7         | 49.8                     |
| <i>SMARCAD1</i> | rs6821438  | A           | G            | 53.4              | 51.8          | 50.5         | 48.8                     |

## Supplemental Table 1. Genetic Variants Selected to Generate Pregnancy Clusters

*Grey shading indicates that the variant was used in the clustering procedure based on nominal association with a trait in Gen3G; RAF=Risk Allele Frequency*

| Locus          | Variant    | Risk allele | Other allele | Reference RAF (%) | Gen3G RAF (%) | HAPO RAF (%) | MGH <sup>2</sup> RAF (%) |
|----------------|------------|-------------|--------------|-------------------|---------------|--------------|--------------------------|
| <i>SLC9B1</i>  | rs1580278  | C           | A            | 47.3              | 46.0          | 46.4         | 41.3                     |
| <i>PABPC4L</i> | rs1296328  | A           | C            | 44.6              | 45.6          | 43.5         | 53.6                     |
| <i>TMEM154</i> | rs7669833  | T           | A            | 70.5              | 68.1          | 69.3         | 65.6                     |
| <i>PDGFC</i>   | rs28819812 | C           | A            | 67.7              | 68.0          | 66.2         | 64.7                     |
| <i>ACSL1</i>   | rs58730668 | T           | C            | 85.8              | 87.8          | 86.6         | 88.2                     |
| <i>MRPS30</i>  | rs6884702  | G           | A            | 39.3              | 38.0          | 38.4         | 43.2                     |
| <i>ITGA1</i>   | rs3811978  | G           | A            | 16.7              | 16.3          | 16.9         | 20.4                     |
| <i>ARL15</i>   | rs702634   | A           | G            | 69.0              | 69.2          | 69.9         | 76.4                     |
| <i>ANKRD55</i> | rs465002   | T           | C            | 74.2              | 73.0          | 74.9         | 71.9                     |
| <i>PIK3R1</i>  | rs4976033  | G           | A            | 41.1              | 41.4          | 38.6         | 43.1                     |
| <i>POC5</i>    | rs2307111  | T           | C            | 60.5              | 58.4          | 60.7         | 56.4                     |
| <i>ZBED3</i>   | rs4457053  | G           | A            | 30.4              | 32.8          | 31.3         | 31.8                     |
| <i>DMGDH</i>   | rs1316776  | C           | A            | 64.8              | 66.2          | 65.5         | 65.5                     |
| <i>RASA1</i>   | rs7719891  | G           | A            | 25.9              | 29.6          | 27.5         | 26.8                     |
| <i>PCSK1</i>   | rs13179048 | C           | A            | 69.0              | 68.3          | 68.8         | 72.1                     |
| <i>PHF15</i>   | rs329122   | A           | G            | 42.9              | 44.2          | 44.0         | 48.5                     |
| <i>EBF1</i>    | rs3934712  | C           | T            | 20.6              | 23.5          | 21.1         | 31.4                     |
| <i>RREB1</i>   | rs9379084  | G           | A            | 88.7              | 88.6          | 86.6         | 89.9                     |
| <i>CDKAL1</i>  | rs7756992  | G           | A            | 27.4              | 26.9          | 26.3         | 30.7                     |
| <i>MHC</i>     | rs601945   | G           | A            | 17.8              | 12.7          | 16.4         | 16.6                     |
| <i>LRFN2</i>   | rs34298980 | T           | C            | 49.7              | 49.2          | 47.6         | 45.2                     |
| <i>VEGFA</i>   | rs6458354  | C           | T            | 28.9              | 28.3          | 30.1         | 27.9                     |
| <i>TFAP2B</i>  | rs3798519  | C           | A            | 18.4              | 18.0          | 19.1         | 24.4                     |
| <i>BEND3</i>   | rs4946812  | G           | A            | 67.4              | 70.4          | 69.5         | 75.4                     |
| <i>CENPW</i>   | rs11759026 | G           | A            | 23.2              | 22.7          | 24.0         | 30.1                     |
| <i>SOGA3</i>   | rs2800733  | A           | G            | 71.7              | 73.4          | 71.2         | 76.2                     |
| <i>SLC35D3</i> | rs9494624  | A           | G            | 29.0              | 25.3          | 28.6         | 26.7                     |
| <i>MIR3668</i> | rs2982521  | A           | T            | 38.0              | 36.2          | 37.0         | 41.3                     |

## Supplemental Table 1. Genetic Variants Selected to Generate Pregnancy Clusters

Grey shading indicates that the variant was used in the clustering procedure based on nominal association with a trait in Gen3G; RAF=Risk Allele Frequency

| Locus           | Variant    | Risk allele | Other allele | Reference RAF (%) | Gen3G RAF (%) | HAPO RAF (%) | MGH <sup>2</sup> RAF (%) |
|-----------------|------------|-------------|--------------|-------------------|---------------|--------------|--------------------------|
| <i>SLC22A3</i>  | rs474513   | A           | G            | 51.7              | 52.3          | 52.5         | 54.4                     |
| <i>QKI</i>      | rs4709746  | C           | T            | 86.8              | 85.4          | 87.4         | 81.9                     |
| <i>DGKB</i>     | rs10228066 | T           | C            | 53.7              | 56.4          | 55.1         | 51.7                     |
| <i>IGF2BP3</i>  | rs4279506  | G           | C            | 61.0              | 60.5          | 60.5         | 49.7                     |
| <i>JAZF1</i>    | rs1708302  | C           | T            | 51.2              | 48.1          | 50.9         | 58.7                     |
| <i>CRHR2</i>    | rs917195   | C           | T            | 77.0              | 77.1          | 76.2         | 69.8                     |
| <i>GCK</i>      | rs878521   | A           | G            | 24.5              | 25.3          | 25.4         | 30.1                     |
| <i>FBXL13</i>   | rs11496066 | T           | C            | 81.8              | 81.3          | 81.6         | 81.8                     |
| <i>RELN</i>     | rs39328    | T           | C            | 43.3              | 38.4          | 42.8         | 38.8                     |
| <i>CTTNBP2</i>  | rs6976111  | A           | C            | 31.3              | 28.9          | 30.2         | 24.4                     |
| <i>KLF14</i>    | rs1562396  | G           | A            | 31.9              | 33.1          | 33.3         | 33.3                     |
| <i>AOC1</i>     | rs62492368 | A           | G            | 30.8              | 32.7          | 30.9         | 37.6                     |
| <i>MNX1</i>     | rs6459733  | G           | C            | 67.3              | 61.3          | 65.5         | 60.5                     |
| <i>PPP1R3B</i>  | rs4841132  | A           | G            | 9.1               | 6.96          | 7.48         | 11.30                    |
| <i>MSRA</i>     | rs17689007 | G           | A            | 53.3              | 54.1          | 49.0         | 61.8                     |
| <i>XKR6</i>     | rs57327348 | A           | T            | 78.2              | 83.6          | 77.3         | 81.4                     |
| <i>LPL</i>      | rs10096633 | C           | T            | 87.7              | 86.3          | 87.8         | 85.4                     |
| <i>PURG</i>     | rs10954772 | T           | C            | 31.4              | 31.6          | 30.1         | 33.2                     |
| <i>ANK1</i>     | rs13262861 | C           | A            | 82.9              | 79.1          | 82.1         | 82.8                     |
| <i>TP53INP1</i> | rs10097617 | T           | C            | 48.5              | 47.4          | 46.4         | 46.1                     |
| <i>TRHR</i>     | rs12680028 | C           | G            | 53.4              | 54.3          | 53.3         | 45.8                     |
| <i>SLC30A8</i>  | rs3802177  | G           | A            | 68.5              | 73.5          | 69.1         | 73.4                     |
| <i>CASC11</i>   | rs17772814 | G           | A            | 91.5              | 92.4          | 93.7         | 94.1                     |
| <i>PVT1</i>     | rs1561927  | C           | T            | 26.9              | 29.0          | 27.2         | 25.6                     |
| <i>BOP1</i>     | rs4977213  | C           | T            | 37.5              | 38.0          | 38.2         | 30.4                     |
| <i>GLIS3</i>    | rs10974438 | C           | A            | 35.7              | 35.2          | 34.9         | 29.7                     |
| <i>HAUS6</i>    | rs7022807  | G           | A            | 40.1              | 38.6          | 39.2         | 40.0                     |
| <i>FOCAD</i>    | rs7867635  | C           | T            | 41.2              | 42.4          | 42.4         | 50.0                     |

## Supplemental Table 1. Genetic Variants Selected to Generate Pregnancy Clusters

Grey shading indicates that the variant was used in the clustering procedure based on nominal association with a trait in Gen3G; RAF=Risk Allele Frequency

| Locus                | Variant    | Risk allele | Other allele | Reference RAF (%) | Gen3G RAF (%) | HAPO RAF (%) | MGH <sup>2</sup> RAF (%) |
|----------------------|------------|-------------|--------------|-------------------|---------------|--------------|--------------------------|
| <i>CDKN2A/B</i>      | rs10811660 | G           | A            | 82.8              | 83.6          | 82.5         | 83.6                     |
| <i>LINGO2</i>        | rs1412234  | C           | T            | 32.3              | 31.5          | 32.7         | 26.0                     |
| <i>UBAP2</i>         | rs12001437 | C           | T            | 37.2              | 40.5          | 36.6         | 40.6                     |
| <i>MTND2P8</i>       | rs11137820 | C           | G            | 57.5              | 60.2          | 57.6         | 51.1                     |
| <i>TLE4</i>          | rs17791513 | A           | G            | 93.2              | 93.7          | 95.2         | 92.1                     |
| <i>TLE1</i>          | rs2796441  | G           | A            | 59.2              | 55.8          | 60.1         | 59.1                     |
| <i>ZNF169</i>        | rs55653563 | A           | C            | 73.2              | 68.9          | 72.4         | 74.3                     |
| <i>ABO</i>           | rs505922   | C           | T            | 33.2              | 34.9          | 29.0         | 29.0                     |
| <i>GPSM1</i>         | rs28505901 | G           | A            | 75.2              | 75.2          | 75.8         | 75.1                     |
| <i>CDC123/CAMK1D</i> | rs11257655 | T           | C            | 21.8              | 19.1          | 19.8         | 21.3                     |
| <i>HKDC1</i>         | rs4746822  | T           | C            | 69.0              | 65.1          | 65.1         | 57.2                     |
| <i>NEUROG3</i>       | rs2642588  | G           | T            | 70.2              | 66.3          | 69.9         | 71.2                     |
| <i>ZMIZ1</i>         | rs703972   | G           | C            | 53.3              | 53.9          | 56.0         | 56.7                     |
| <i>PTEN</i>          | rs11202627 | T           | C            | 15.2              | 13.5          | 15.5         | 17.8                     |
| <i>HHEX/IDE</i>      | rs10882101 | T           | C            | 58.7              | 55.4          | 59.0         | 59.7                     |
| <i>TCF7L2</i>        | rs7903146  | T           | C            | 29.5              | 32.2          | 30.2         | 27.0                     |
| <i>WDR11</i>         | rs72631105 | A           | G            | 19.0              | 18.0          | 17.3         | 17.6                     |
| <i>PLEKHA1</i>       | rs2280141  | T           | G            | 51.6              | 53.4          | 52.4         | 43.7                     |
| <i>INS/IGF2</i>      | rs4929965  | A           | G            | 38.3              | 36.0          | 36.1         | 35.0                     |
| <i>KCNQ1</i>         | rs2237895  | C           | A            | 42.6              | 41.1          | 39.7         | 37.6                     |
| <i>KCNJ11</i>        | rs5213     | C           | T            | 36.2              | 35.3          | 35.2         | 33.0                     |
| <i>METTL15</i>       | rs4923543  | A           | G            | 33.2              | 29.5          | 33.4         | 30.1                     |
| <i>PDHX</i>          | rs2767036  | C           | A            | 29.1              | 33.3          | 28.6         | 36.1                     |
| <i>HSD17B12</i>      | rs1061810  | A           | C            | 28.8              | 31.8          | 30.9         | 35.7                     |
| <i>CRY2</i>          | rs7115753  | A           | G            | 44.9              | 42.4          | 44.5         | 47.9                     |
| <i>CELF1</i>         | rs7124681  | A           | C            | 41.0              | 43.7          | 42.6         | 38.0                     |
| <i>MAP3K11</i>       | rs1783541  | T           | C            | 20.4              | 18.5          | 21.5         | 20.6                     |
| <i>CENTD2/ARAP1</i>  | rs77464186 | A           | C            | 83.6              | 85.5          | 86.5         | 87.1                     |

## Supplemental Table 1. Genetic Variants Selected to Generate Pregnancy Clusters

Grey shading indicates that the variant was used in the clustering procedure based on nominal association with a trait in Gen3G; RAF=Risk Allele Frequency

| Locus              | Variant    | Risk allele | Other allele | Reference RAF (%) | Gen3G RAF (%) | HAPO RAF (%) | MGH <sup>2</sup> RAF (%) |
|--------------------|------------|-------------|--------------|-------------------|---------------|--------------|--------------------------|
| <i>MTNR1B</i>      | rs10830963 | G           | C            | 27.7              | 28.4          | 28.0         | 21.6                     |
| <i>ETS1</i>        | rs67232546 | T           | C            | 20.7              | 21.2          | 20.6         | 19.4                     |
| <i>CDKN1B</i>      | rs2066827  | G           | T            | 23.5              | 23.4          | 21.9         | 21.2                     |
| <i>ITPR2</i>       | rs718314   | G           | A            | 25.3              | 24.5          | 24.3         | 34.1                     |
| <i>KLHDC5</i>      | rs10842994 | C           | T            | 80.5              | 78.2          | 79.8         | 81.7                     |
| <i>HMGA2</i>       | rs2258238  | T           | A            | 10.4              | 11.4          | 11.1         | 12.5                     |
| <i>TSPAN8/LGR5</i> | rs1796330  | G           | C            | 57.1              | 55.7          | 55.4         | 53.8                     |
| <i>USP44</i>       | rs2197973  | T           | C            | 53.8              | 52.7          | 53.7         | 65.8                     |
| <i>RMST</i>        | rs77864822 | A           | G            | 93.2              | 93.7          | 92.8         | 95.3                     |
| <i>WSCD2</i>       | rs1426371  | G           | A            | 73.9              | 78.7          | 75.4         | 80.2                     |
| <i>KSR2</i>        | rs34965774 | A           | G            | 14.4              | 13.9          | 12.6         | 15.9                     |
| <i>HNF1A</i>       | rs56348580 | G           | C            | 68.9              | 69.4          | 68.5         | 69.2                     |
| <i>MPHOSPH9</i>    | rs4148856  | C           | G            | 78.1              | 76.1          | 79.9         | 77.4                     |
| <i>ZNF664</i>      | rs7978610  | G           | C            | 66.6              | 65.2          | 64.4         | 66.7                     |
| <i>FBRSL1</i>      | rs12811407 | A           | G            | 33.1              | 30.0          | 32.2         | 27.6                     |
| <i>RNF6</i>        | rs34584161 | A           | G            | 76.0              | 75.2          | 76.6         | 77.2                     |
| <i>HMGB1</i>       | rs11842871 | G           | T            | 73.5              | 77.5          | 75.0         | 80.6                     |
| <i>KL</i>          | rs576674   | G           | A            | 16.9              | 19.3          | 17.1         | 27.5                     |
| <i>DLEU1</i>       | rs963740   | A           | T            | 71.3              | 69.0          | 70.2         | 72.6                     |
| <i>PCDH17</i>      | rs9537803  | C           | T            | 27.7              | 26.7          | 25.3         | 27.5                     |
| <i>SRGAP2D</i>     | rs9563615  | A           | T            | 71.0              | 70.6          | 70.9         | 71.9                     |
| <i>SPRY2</i>       | rs1359790  | G           | A            | 72.0              | 71.4          | 70.3         | 71.3                     |
| <i>IRS2</i>        | rs7987740  | T           | C            | 60.9              | 62.7          | 59.6         | 64.4                     |
| <i>SLC7A7</i>      | rs17122772 | G           | C            | 22.8              | 21.2          | 23.4         | 18.7                     |
| <i>AKAP6</i>       | rs17522122 | T           | G            | 47.4              | 46.9          | 40.1         | 40.8                     |
| <i>CLEC14A</i>     | rs8017808  | G           | T            | 74.3              | 72.8          | 74.4         | 65.4                     |
| <i>NRXN3</i>       | rs17836088 | C           | G            | 21.7              | 20.2          | 12.6         | 17.5                     |
| <i>SMEK1</i>       | rs8010382  | G           | A            | 42.1              | 39.9          | 44.2         | 47.1                     |

## Supplemental Table 1. Genetic Variants Selected to Generate Pregnancy Clusters

Grey shading indicates that the variant was used in the clustering procedure based on nominal association with a trait in Gen3G; RAF=Risk Allele Frequency

| Locus    | Variant    | Risk allele | Other allele | Reference RAF (%) | Gen3G RAF (%) | HAPO RAF (%) | MGH <sup>2</sup> RAF (%) |
|----------|------------|-------------|--------------|-------------------|---------------|--------------|--------------------------|
| MARK3    | rs62007683 | G           | T            | 65.3              | 65.7          | 65.5         | 67.4                     |
| RASGRP1  | rs34715063 | C           | T            | 12.4              | 12.0          | 12.8         | 1.00                     |
| LTK      | rs11070332 | A           | G            | 35.8              | 40.8          | 34.8         | 37.1                     |
| ONECUT1  | rs2456530  | T           | C            | 12.7              | 12.4          | 13.1         | 16.8                     |
| C2CD4A/B | rs8037894  | G           | C            | 56.6              | 57.4          | 58.0         | 53.7                     |
| USP3     | rs7178762  | C           | T            | 46.0              | 39.8          | 44.4         | 48.7                     |
| MAP2K5   | rs4776970  | A           | T            | 64.1              | 64.6          | 53.5         | 53.2                     |
| PTPN9    | rs13737    | G           | T            | 75.9              | 72.6          | 72.2         | 69.3                     |
| HMG20A   | rs1005752  | A           | C            | 71.5              | 72.1          | 71.1         | 63.8                     |
| AP3S2    | rs4932265  | T           | C            | 26.7              | 28.2          | 26.9         | 24.0                     |
| PRC1     | rs12910825 | G           | A            | 36.1              | 40.5          | 35.9         | 54.2                     |
| ITFG3    | rs6600191  | T           | C            | 82.5              | 82.0          | 82.0         | 76.4                     |
| CLUAP1   | rs3751837  | T           | C            | 22.0              | 22.0          | 22.8         | 19.2                     |
| ATP2A1   | rs8046545  | G           | A            | 35.9              | 33.6          | 32.6         | 33.3                     |
| FAM57B   | rs11642430 | G           | C            | 39.9              | 36.1          | 41.2         | 33.8                     |
| FTO      | rs1421085  | C           | T            | 41.5              | 39.4          | 41.3         | 33.3                     |
| NFAT5    | rs862320   | C           | T            | 57.8              | 60.4          | 60.4         | 63.3                     |
| BCAR1    | rs72802342 | C           | A            | 92.3              | 91.9          | 92.6         | 92.1                     |
| CMIP     | rs2925979  | T           | C            | 30.0              | 28.1          | 29.9         | 26.4                     |
| SPG7     | rs12920022 | A           | T            | 15.8              | 16.8          | 14.9         | 14.2                     |
| ZZEF1    | rs1377807  | C           | G            | 31.2              | 31.8          | 29.2         | 29.3                     |
| ATP1B2   | rs1641523  | C           | T            | 42.8              | 39.8          | 41.3         | 42.9                     |
| GLP2R    | rs7222481  | C           | G            | 32.4              | 30.6          | 31.4         | 24.6                     |
| RAI1     | rs4925109  | A           | G            | 31.6              | 38.5          | 32.2         | 44.4                     |
| NF1      | rs71372253 | C           | T            | 6.42              | 7.82          | 6.72         | 5.80                     |
| HNF1B    | rs10908278 | T           | A            | 48.1              | 48.5          | 46.9         | 46.8                     |
| MLX      | rs34855406 | C           | G            | 27.7              | 25.6          | 27.1         | 22.1                     |
| TTLL6    | rs35895680 | C           | A            | 67.8              | 67.8          | 63.2         | 69.2                     |



## Supplemental Table 1. Genetic Variants Selected to Generate Pregnancy Clusters

Grey shading indicates that the variant was used in the clustering procedure based on nominal association with a trait in Gen3G; RAF=Risk Allele Frequency

| Locus              | Variant     | Risk allele | Other allele | Reference RAF (%) | Gen3G RAF (%) | HAPO RAF (%) | MGH <sup>2</sup> RAF (%) |
|--------------------|-------------|-------------|--------------|-------------------|---------------|--------------|--------------------------|
| <i>ACE</i>         | rs60276348  | T           | C            | 14.0              | 18.7          | 14.8         | 19.2                     |
| <i>BPTF</i>        | rs61676547  | C           | G            | 19.2              | 20.3          | 19.1         | 27.8                     |
| <i>LAMA1</i>       | rs7240767   | C           | T            | 37.6              | 40.7          | 37.5         | 46.6                     |
| <i>COMMD9</i>      | rs62080313  | C           | T            | 12.3              | 14.4          | 13.2         | 10.5                     |
| <i>TCF4</i>        | rs72926932  | C           | A            | 8.39              | 7.56          | 7.62         | 5.28                     |
| <i>WDR7</i>        | rs17684074  | G           | C            | 74.0              | 74.6          | 75.3         | 76.8                     |
| <i>GRP</i>         | rs9957145   | G           | A            | 82.9              | 85.7          | 82.8         | 78.4                     |
| <i>MC4R</i>        | rs523288    | T           | A            | 23.8              | 24.1          | 23.8         | 23.6                     |
| <i>BCL2A</i>       | rs12454712  | T           | C            | 61.4              | 63.2          | 61.0         | 67.7                     |
| <i>UHRF1</i>       | rs7249758   | A           | G            | 20.4              | 20.8          | 21.4         | 18.0                     |
| <i>INSR</i>        | rs75253922  | C           | T            | 19.1              | 20.0          | 19.3         | 17.4                     |
| <i>MAP2K7</i>      | rs4804833   | A           | G            | 39.0              | 40.6          | 39.2         | 44.7                     |
| <i>FARSA</i>       | rs3111316   | A           | G            | 58.9              | 60.5          | 61.2         | 59.0                     |
| <i>TM6SF2</i>      | rs8107974   | T           | A            | 7.69              | 6.36          | 6.54         | 7.92                     |
| <i>PEPD</i>        | rs10406327  | C           | G            | 52.3              | 53.2          | 53.5         | 61.0                     |
| <i>TOMM40/APOE</i> | rs429358    | T           | C            | 84.6              | 87.8          | 85.3         | 87.2                     |
| <i>GIPR</i>        | rs10406431  | A           | G            | 56.3              | 61.1          | 56.0         | 52.6                     |
| <i>ZC3H4</i>       | rs3810291   | A           | G            | 67.3              | 66.4          | 68.0         | 57.5                     |
| <i>NKX2.2</i>      | rs13041756  | C           | T            | 10.7              | 9.83          | 10.7         | 12.4                     |
| <i>RALY</i>        | rs2268078   | A           | G            | 65.7              | 66.6          | 67.3         | 69.4                     |
| <i>EYA2</i>        | rs6063048   | G           | A            | 72.5              | 75.6          | 74.2         | 76.9                     |
| <i>CEBPB</i>       | rs11699802  | C           | T            | 53.6              | 55.9          | 54.8         | 53.3                     |
| <i>TSHZ2</i>       | rs34454109  | A           | T            | 77.1              | 78.9          | 77.6         | 79.6                     |
| <i>GNAS</i>        | rs6070625   | G           | C            | 51.7              | 45.1          | 51.5         | 49.3                     |
| <i>TCEA2</i>       | rs59944054  | A           | G            | 23.8              | 21.5          | 23.0         | 20.5                     |
| <i>MTMR3/ASCC2</i> | rs6518681   | G           | A            | 91.4              | 92.6          | 91.2         | 93.0                     |
| <i>YWHAH</i>       | rs117001013 | C           | T            | 91.2              | 94.3          | 92.7         | 94                       |
| <i>EP300</i>       | rs5758223   | A           | G            | 71.7              | 72.7          | 73.3         | 78.0                     |

**Supplemental Table 1. Genetic Variants Selected to Generate Pregnancy Clusters**

*Grey shading indicates that the variant was used in the clustering procedure based on nominal association with a trait in Gen3G; RAF=Risk Allele Frequency*

| Locus         | Variant   | Risk allele | Other allele | Reference RAF (%) | Gen3G RAF (%) | HAPO RAF (%) | MGH <sup>2</sup> RAF (%) |
|---------------|-----------|-------------|--------------|-------------------|---------------|--------------|--------------------------|
| <i>PNPLA3</i> | rs738408  | T           | C            | 22.6              | 26.3          | 21.7         | 31.7                     |
| <i>PIM3</i>   | rs1801645 | C           | T            | 27.5              | 23.3          | 24.6         | 24.0                     |

**Supplemental Table 2. Associations Between Genetic Variants and Traits in Gen3G**

*Linear regression was used to quantify associations between variants and 35 metabolic traits*

| Locus               | Variant     | Fasting Adiponectin (adj BMI) -V2 (ug/ml) |       |         | Fasting Adiponectin -V2 (ug/ml) |       |         |
|---------------------|-------------|-------------------------------------------|-------|---------|---------------------------------|-------|---------|
|                     |             | beta                                      | SE    | p-value | beta                            | SE    | p-value |
| <i>MACF1</i>        | rs3768321   | -0.008                                    | 0.348 | 0.982   | 0.110                           | 0.353 | 0.755   |
| <i>FAF1</i>         | rs58432198  | -0.064                                    | 0.448 | 0.886   | -0.153                          | 0.455 | 0.737   |
| <i>PATJ</i>         | rs12140153  | 0.265                                     | 0.509 | 0.603   | 0.200                           | 0.517 | 0.699   |
| <i>PTGFRN</i>       | rs1127215   | -0.321                                    | 0.280 | 0.252   | -0.310                          | 0.285 | 0.277   |
| <i>NOTCH2</i>       | rs1493694   | 0.155                                     | 0.486 | 0.750   | 0.065                           | 0.491 | 0.895   |
| <i>SEC16B</i>       | rs539515    | 0.294                                     | 0.373 | 0.430   | 0.176                           | 0.379 | 0.642   |
| <i>DSTYK</i>        | rs12048743  | -0.014                                    | 0.289 | 0.961   | 0.007                           | 0.294 | 0.980   |
| <i>SRGAP2</i>       | rs9430095   | 0.405                                     | 0.279 | 0.148   | 0.379                           | 0.284 | 0.182   |
| <i>PROX1</i>        | rs340874    | 0.519                                     | 0.285 | 0.070   | 0.614                           | 0.289 | 0.034   |
| <i>LYPLAL1</i>      | rs2820446   | -0.360                                    | 0.318 | 0.258   | -0.426                          | 0.323 | 0.188   |
| <i>ABCB10</i>       | rs348330    | -0.100                                    | 0.295 | 0.734   | -0.167                          | 0.300 | 0.577   |
| <i>GNG4</i>         | rs291367    | 0.135                                     | 0.297 | 0.650   | 0.173                           | 0.302 | 0.566   |
| <i>FAM49A</i>       | rs11680058  | 0.022                                     | 0.417 | 0.958   | 0.074                           | 0.424 | 0.862   |
| <i>DTNB</i>         | rs17802463  | 0.225                                     | 0.314 | 0.473   | 0.214                           | 0.319 | 0.502   |
| <i>GCKR</i>         | rs1260326   | -0.011                                    | 0.279 | 0.968   | -0.069                          | 0.283 | 0.808   |
| <i>THADA</i>        | rs80147536  | -0.517                                    | 0.445 | 0.247   | -0.431                          | 0.453 | 0.342   |
| <i>BNIP1</i>        | rs6545714   | -0.161                                    | 0.291 | 0.580   | -0.229                          | 0.296 | 0.438   |
| <i>BCL11A</i>       | rs243024    | 0.228                                     | 0.283 | 0.420   | 0.303                           | 0.287 | 0.291   |
| <i>CEP68</i>        | rs2249105   | 0.447                                     | 0.293 | 0.128   | 0.362                           | 0.298 | 0.225   |
| <i>GLI2</i>         | rs11688682  | -0.130                                    | 0.347 | 0.709   | -0.223                          | 0.352 | 0.527   |
| <i>PABPC1P2</i>     | rs35999103  | -0.450                                    | 0.363 | 0.215   | -0.564                          | 0.368 | 0.126   |
| <i>CYTIP</i>        | rs13426680  | 0.009                                     | 0.568 | 0.988   | 0.002                           | 0.578 | 0.997   |
| <i>RBMS1</i>        | rs3772071   | -0.447                                    | 0.310 | 0.150   | -0.403                          | 0.315 | 0.201   |
| <i>GRB14/COBLL1</i> | rs10195252  | -0.553                                    | 0.302 | 0.067   | -0.547                          | 0.307 | 0.075   |
| <i>G6PC2</i>        | rs1402837   | 0.126                                     | 0.324 | 0.697   | 0.117                           | 0.328 | 0.722   |
| <i>CRYBA2</i>       | rs113414093 | -0.365                                    | 1.126 | 0.746   | -0.702                          | 1.120 | 0.531   |
| <i>IRS1</i>         | rs2972144   | 0.229                                     | 0.305 | 0.453   | 0.130                           | 0.310 | 0.675   |
| <i>PPARG</i>        | rs11709077  | -0.595                                    | 0.457 | 0.193   | -0.518                          | 0.463 | 0.264   |

| Locus          | Variant    | Fasting Adiponectin (adj BMI) -V2 (ug/ml) |       |         | Fasting Adiponectin -V2 (ug/ml) |       |         |
|----------------|------------|-------------------------------------------|-------|---------|---------------------------------|-------|---------|
|                |            | beta                                      | SE    | p-value | beta                            | SE    | p-value |
| <i>UBE2E2</i>  | rs35352848 | 0.028                                     | 0.341 | 0.935   | 0.033                           | 0.347 | 0.925   |
| <i>KIF9</i>    | rs11926707 | -0.160                                    | 0.297 | 0.589   | -0.177                          | 0.301 | 0.557   |
| <i>RBM6</i>    | rs4688760  | -0.371                                    | 0.313 | 0.236   | -0.425                          | 0.318 | 0.181   |
| <i>RFT1</i>    | rs2581787  | 0.246                                     | 0.285 | 0.388   | 0.230                           | 0.289 | 0.426   |
| <i>PSMD6</i>   | rs3774723  | -0.026                                    | 0.390 | 0.947   | 0.004                           | 0.397 | 0.993   |
| <i>ADAMTS9</i> | rs9860730  | 0.046                                     | 0.296 | 0.876   | 0.054                           | 0.301 | 0.858   |
| <i>SHQ1</i>    | rs13085136 | -0.575                                    | 0.722 | 0.426   | -0.941                          | 0.729 | 0.197   |
| <i>ROBO2</i>   | rs2272163  | -0.176                                    | 0.288 | 0.541   | -0.273                          | 0.292 | 0.350   |
| <i>ADCY5</i>   | rs11708067 | 0.382                                     | 0.346 | 0.270   | 0.266                           | 0.351 | 0.450   |
| <i>SLC12A8</i> | rs649961   | 0.084                                     | 0.283 | 0.767   | 0.165                           | 0.287 | 0.565   |
| <i>TMCC1</i>   | rs9828772  | -0.896                                    | 0.510 | 0.080   | -0.996                          | 0.519 | 0.056   |
| <i>TSC22D2</i> | rs62271373 | -1.042                                    | 0.503 | 0.039   | -1.004                          | 0.512 | 0.050   |
| <i>MBNL1</i>   | rs13065698 | 0.349                                     | 0.292 | 0.232   | 0.331                           | 0.297 | 0.265   |
| <i>EGFEM1P</i> | rs7629630  | -0.520                                    | 0.398 | 0.192   | -0.544                          | 0.405 | 0.180   |
| <i>SLC2A2</i>  | rs9873618  | -0.214                                    | 0.313 | 0.494   | -0.279                          | 0.318 | 0.381   |
| <i>ABCC5</i>   | rs2872246  | 0.313                                     | 0.273 | 0.252   | 0.236                           | 0.277 | 0.395   |
| <i>IGF2BP2</i> | rs6780171  | -0.090                                    | 0.308 | 0.770   | -0.066                          | 0.313 | 0.833   |
| <i>ST6GAL1</i> | rs3887925  | 0.162                                     | 0.284 | 0.569   | 0.288                           | 0.287 | 0.317   |
| <i>LPP</i>     | rs4686471  | 0.009                                     | 0.293 | 0.974   | -0.044                          | 0.298 | 0.883   |
| <i>MAEA</i>    | rs56337234 | -0.256                                    | 0.311 | 0.411   | -0.229                          | 0.316 | 0.470   |
| <i>HTT</i>     | rs362307   | 0.059                                     | 0.561 | 0.917   | -0.035                          | 0.570 | 0.951   |
| <i>WFS1</i>    | rs10937721 | 0.263                                     | 0.284 | 0.355   | 0.229                           | 0.289 | 0.428   |
| <i>LCORL</i>   | rs12640250 | -0.189                                    | 0.328 | 0.564   | -0.180                          | 0.334 | 0.590   |
| <i>GNPDA2</i>  | rs10938398 | 0.434                                     | 0.282 | 0.125   | 0.351                           | 0.287 | 0.222   |
| <i>USP46</i>   | rs2102278  | -0.340                                    | 0.311 | 0.274   | -0.309                          | 0.316 | 0.329   |
| <i>SCD5</i>    | rs12642790 | 0.092                                     | 0.301 | 0.759   | 0.150                           | 0.306 | 0.624   |
| <i>FAM13A</i>  | rs1903002  | -0.608                                    | 0.287 | 0.034   | -0.586                          | 0.291 | 0.045   |
| <i>SMARCA1</i> | rs6821438  | -0.095                                    | 0.290 | 0.744   | -0.147                          | 0.295 | 0.618   |
| <i>SLC9B1</i>  | rs1580278  | -0.314                                    | 0.289 | 0.278   | -0.281                          | 0.294 | 0.340   |
| <i>PABPC4L</i> | rs1296328  | 0.216                                     | 0.296 | 0.466   | 0.168                           | 0.301 | 0.577   |

| Locus          | Variant    | Fasting Adiponectin (adj BMI) -V2 (ug/ml) |       |         | Fasting Adiponectin -V2 (ug/ml) |       |         |
|----------------|------------|-------------------------------------------|-------|---------|---------------------------------|-------|---------|
|                |            | beta                                      | SE    | p-value | beta                            | SE    | p-value |
| <i>TMEM154</i> | rs7669833  | 0.258                                     | 0.305 | 0.397   | 0.210                           | 0.310 | 0.498   |
| <i>PDGFC</i>   | rs28819812 | -0.215                                    | 0.305 | 0.481   | -0.085                          | 0.309 | 0.784   |
| <i>ACSL1</i>   | rs58730668 | -0.306                                    | 0.418 | 0.463   | -0.257                          | 0.425 | 0.546   |
| <i>MRPS30</i>  | rs6884702  | -0.105                                    | 0.288 | 0.715   | -0.187                          | 0.292 | 0.522   |
| <i>ITGA1</i>   | rs3811978  | -0.127                                    | 0.381 | 0.739   | -0.227                          | 0.387 | 0.558   |
| <i>ARL15</i>   | rs702634   | -0.302                                    | 0.309 | 0.329   | -0.292                          | 0.314 | 0.351   |
| <i>ANKRD55</i> | rs465002   | 0.007                                     | 0.310 | 0.982   | -0.013                          | 0.316 | 0.968   |
| <i>PIK3R1</i>  | rs4976033  | -0.221                                    | 0.280 | 0.431   | -0.340                          | 0.282 | 0.229   |
| <i>POC5</i>    | rs2307111  | 0.320                                     | 0.280 | 0.252   | 0.262                           | 0.284 | 0.357   |
| <i>ZBED3</i>   | rs4457053  | -0.331                                    | 0.306 | 0.280   | -0.269                          | 0.312 | 0.389   |
| <i>DMGDH</i>   | rs1316776  | -0.055                                    | 0.300 | 0.855   | -0.019                          | 0.305 | 0.952   |
| <i>RASA1</i>   | rs7719891  | 0.147                                     | 0.302 | 0.627   | 0.184                           | 0.307 | 0.548   |
| <i>PCSK1</i>   | rs13179048 | 0.128                                     | 0.301 | 0.671   | 0.108                           | 0.307 | 0.724   |
| <i>PHF15</i>   | rs329122   | 0.137                                     | 0.296 | 0.643   | 0.069                           | 0.300 | 0.818   |
| <i>EBF1</i>    | rs3934712  | 0.148                                     | 0.340 | 0.664   | 0.128                           | 0.346 | 0.713   |
| <i>RREB1</i>   | rs9379084  | -0.192                                    | 0.467 | 0.680   | -0.164                          | 0.470 | 0.727   |
| <i>CDKAL1</i>  | rs7756992  | -0.249                                    | 0.316 | 0.431   | -0.190                          | 0.321 | 0.553   |
| <i>MHC</i>     | rs601945   | -0.081                                    | 0.419 | 0.847   | -0.118                          | 0.426 | 0.781   |
| <i>LRFN2</i>   | rs34298980 | -0.289                                    | 0.300 | 0.336   | -0.221                          | 0.305 | 0.468   |
| <i>VEGFA</i>   | rs6458354  | 0.219                                     | 0.319 | 0.492   | 0.309                           | 0.324 | 0.339   |
| <i>TFAP2B</i>  | rs3798519  | 0.083                                     | 0.370 | 0.822   | 0.001                           | 0.375 | 0.998   |
| <i>BEND3</i>   | rs4946812  | 0.013                                     | 0.322 | 0.969   | -0.040                          | 0.326 | 0.903   |
| <i>CENPW</i>   | rs11759026 | 0.370                                     | 0.346 | 0.285   | 0.330                           | 0.352 | 0.348   |
| <i>SOGA3</i>   | rs2800733  | 0.611                                     | 0.318 | 0.055   | 0.555                           | 0.324 | 0.087   |
| <i>SLC35D3</i> | rs9494624  | -0.615                                    | 0.321 | 0.056   | -0.530                          | 0.327 | 0.105   |
| <i>MIR3668</i> | rs2982521  | 0.290                                     | 0.295 | 0.326   | 0.250                           | 0.299 | 0.405   |
| <i>SLC22A3</i> | rs474513   | 0.080                                     | 0.286 | 0.780   | 0.067                           | 0.290 | 0.816   |
| <i>QKI</i>     | rs4709746  | -0.188                                    | 0.412 | 0.648   | -0.235                          | 0.419 | 0.576   |
| <i>DGKB</i>    | rs10228066 | 0.383                                     | 0.285 | 0.179   | 0.300                           | 0.289 | 0.299   |
| <i>IGF2BP3</i> | rs4279506  | -0.215                                    | 0.285 | 0.450   | -0.165                          | 0.289 | 0.568   |

| Locus    | Variant    | Fasting Adiponectin (adj BMI) -V2 (ug/ml) |       |         | Fasting Adiponectin -V2 (ug/ml) |       |         |
|----------|------------|-------------------------------------------|-------|---------|---------------------------------|-------|---------|
|          |            | beta                                      | SE    | p-value | beta                            | SE    | p-value |
| JAZF1    | rs1708302  | -0.065                                    | 0.278 | 0.814   | -0.017                          | 0.282 | 0.953   |
| CRHR2    | rs917195   | 0.028                                     | 0.333 | 0.932   | -0.120                          | 0.337 | 0.723   |
| GCK      | rs878521   | 0.206                                     | 0.323 | 0.524   | 0.220                           | 0.329 | 0.505   |
| FBXL13   | rs11496066 | -0.518                                    | 0.375 | 0.167   | -0.527                          | 0.381 | 0.167   |
| RELN     | rs39328    | 0.386                                     | 0.291 | 0.186   | 0.371                           | 0.297 | 0.212   |
| CTTNBP2  | rs6976111  | 0.306                                     | 0.311 | 0.327   | 0.348                           | 0.317 | 0.272   |
| KLF14    | rs1562396  | 0.348                                     | 0.311 | 0.263   | 0.360                           | 0.316 | 0.255   |
| AOC1     | rs62492368 | -0.252                                    | 0.305 | 0.409   | -0.215                          | 0.310 | 0.488   |
| MNX1     | rs6459733  | 0.075                                     | 0.284 | 0.791   | 0.024                           | 0.289 | 0.934   |
| PPP1R3B  | rs4841132  | -0.062                                    | 0.545 | 0.910   | 0.083                           | 0.554 | 0.881   |
| MSRA     | rs17689007 | 0.152                                     | 0.272 | 0.576   | 0.189                           | 0.277 | 0.494   |
| XKR6     | rs57327348 | -0.181                                    | 0.385 | 0.639   | -0.183                          | 0.392 | 0.640   |
| LPL      | rs10096633 | 0.195                                     | 0.417 | 0.641   | 0.248                           | 0.424 | 0.559   |
| PURG     | rs10954772 | -0.679                                    | 0.302 | 0.025   | -0.740                          | 0.306 | 0.016   |
| ANK1     | rs13262861 | -0.405                                    | 0.350 | 0.248   | -0.392                          | 0.354 | 0.268   |
| TP53INP1 | rs10097617 | 0.414                                     | 0.285 | 0.147   | 0.386                           | 0.290 | 0.183   |
| TRHR     | rs12680028 | -0.283                                    | 0.285 | 0.320   | -0.349                          | 0.289 | 0.228   |
| SLC30A8  | rs3802177  | -0.253                                    | 0.310 | 0.415   | -0.216                          | 0.315 | 0.494   |
| CASC11   | rs17772814 | 0.429                                     | 0.531 | 0.420   | 0.491                           | 0.540 | 0.364   |
| PVT1     | rs1561927  | 0.402                                     | 0.310 | 0.195   | 0.438                           | 0.315 | 0.165   |
| BOP1     | rs4977213  | -0.053                                    | 0.284 | 0.851   | 0.004                           | 0.289 | 0.988   |
| GLIS3    | rs10974438 | 0.154                                     | 0.295 | 0.602   | 0.128                           | 0.300 | 0.670   |
| HAUS6    | rs7022807  | -0.320                                    | 0.289 | 0.269   | -0.367                          | 0.293 | 0.212   |
| FOCAD    | rs7867635  | 0.104                                     | 0.289 | 0.720   | 0.051                           | 0.294 | 0.862   |
| CDKN2A/B | rs10811660 | 0.174                                     | 0.381 | 0.649   | 0.176                           | 0.388 | 0.650   |
| LINGO2   | rs1412234  | 0.409                                     | 0.304 | 0.179   | 0.410                           | 0.309 | 0.186   |
| UBAP2    | rs12001437 | -0.449                                    | 0.282 | 0.112   | -0.511                          | 0.286 | 0.075   |
| MTND2P8  | rs11137820 | -0.154                                    | 0.282 | 0.585   | -0.178                          | 0.287 | 0.535   |
| TLE4     | rs17791513 | -0.526                                    | 0.608 | 0.388   | -0.634                          | 0.618 | 0.306   |
| TLE1     | rs2796441  | -0.347                                    | 0.275 | 0.207   | -0.325                          | 0.279 | 0.245   |

| Locus                | Variant    | Fasting Adiponectin (adj BMI) -V2 (ug/ml) |       |         | Fasting Adiponectin -V2 (ug/ml) |       |         |
|----------------------|------------|-------------------------------------------|-------|---------|---------------------------------|-------|---------|
|                      |            | beta                                      | SE    | p-value | beta                            | SE    | p-value |
| <i>ZNF169</i>        | rs55653563 | 0.332                                     | 0.316 | 0.293   | 0.243                           | 0.321 | 0.450   |
| <i>ABO</i>           | rs505922   | 0.132                                     | 0.291 | 0.650   | 0.167                           | 0.296 | 0.572   |
| <i>GPSM1</i>         | rs28505901 | -0.282                                    | 0.360 | 0.434   | -0.246                          | 0.366 | 0.502   |
| <i>CDC123/CAMK1D</i> | rs11257655 | -0.267                                    | 0.355 | 0.453   | -0.383                          | 0.360 | 0.288   |
| <i>HKDC1</i>         | rs4746822  | 0.415                                     | 0.293 | 0.157   | 0.327                           | 0.298 | 0.273   |
| <i>NEUROG3</i>       | rs2642588  | 0.206                                     | 0.307 | 0.503   | 0.180                           | 0.312 | 0.565   |
| <i>ZMIZ1</i>         | rs703972   | -0.178                                    | 0.295 | 0.545   | -0.196                          | 0.300 | 0.514   |
| <i>PTEN</i>          | rs11202627 | 0.402                                     | 0.396 | 0.310   | 0.437                           | 0.403 | 0.279   |
| <i>HHEX/IDE</i>      | rs10882101 | 0.293                                     | 0.285 | 0.305   | 0.277                           | 0.290 | 0.339   |
| <i>TCF7L2</i>        | rs7903146  | 0.143                                     | 0.295 | 0.627   | 0.142                           | 0.300 | 0.637   |
| <i>WDR11</i>         | rs72631105 | 0.434                                     | 0.379 | 0.252   | 0.416                           | 0.385 | 0.281   |
| <i>PLEKHA1</i>       | rs2280141  | -0.137                                    | 0.286 | 0.631   | -0.197                          | 0.291 | 0.498   |
| <i>INS/IGF2</i>      | rs4929965  | 0.004                                     | 0.290 | 0.988   | -0.065                          | 0.294 | 0.824   |
| <i>KCNQ1</i>         | rs2237895  | -0.040                                    | 0.273 | 0.884   | -0.003                          | 0.278 | 0.992   |
| <i>KCNJ11</i>        | rs5213     | 0.547                                     | 0.307 | 0.075   | 0.514                           | 0.311 | 0.100   |
| <i>METTL15</i>       | rs4923543  | -0.261                                    | 0.311 | 0.401   | -0.168                          | 0.315 | 0.593   |
| <i>PDHX</i>          | rs2767036  | -0.723                                    | 0.307 | 0.019   | -0.669                          | 0.312 | 0.032   |
| <i>HSD17B12</i>      | rs1061810  | -0.120                                    | 0.316 | 0.705   | -0.103                          | 0.321 | 0.748   |
| <i>CRY2</i>          | rs7115753  | 0.280                                     | 0.288 | 0.332   | 0.287                           | 0.292 | 0.326   |
| <i>CELF1</i>         | rs7124681  | 0.182                                     | 0.275 | 0.509   | 0.185                           | 0.280 | 0.508   |
| <i>MAP3K11</i>       | rs1783541  | -0.532                                    | 0.376 | 0.158   | -0.616                          | 0.379 | 0.105   |
| <i>CENTD2/ARAP1</i>  | rs77464186 | -0.893                                    | 0.401 | 0.026   | -0.968                          | 0.407 | 0.018   |
| <i>MTNR1B</i>        | rs10830963 | -0.122                                    | 0.317 | 0.702   | -0.211                          | 0.322 | 0.512   |
| <i>ETS1</i>          | rs67232546 | -0.512                                    | 0.341 | 0.134   | -0.407                          | 0.344 | 0.238   |
| <i>CDKN1B</i>        | rs2066827  | -0.262                                    | 0.440 | 0.551   | -0.162                          | 0.447 | 0.717   |
| <i>ITPR2</i>         | rs718314   | -0.644                                    | 0.324 | 0.048   | -0.577                          | 0.330 | 0.081   |
| <i>KLHDC5</i>        | rs10842994 | -0.076                                    | 0.345 | 0.827   | -0.086                          | 0.351 | 0.806   |
| <i>HMGA2</i>         | rs2258238  | -0.627                                    | 0.447 | 0.161   | -0.593                          | 0.452 | 0.190   |
| <i>TSPAN8/LGR5</i>   | rs1796330  | -0.537                                    | 0.288 | 0.063   | -0.537                          | 0.293 | 0.067   |
| <i>USP44</i>         | rs2197973  | 0.093                                     | 0.277 | 0.737   | 0.021                           | 0.281 | 0.942   |

| Locus           | Variant    | Fasting Adiponectin (adj BMI) -V2 (ug/ml) |       |         | Fasting Adiponectin -V2 (ug/ml) |       |         |
|-----------------|------------|-------------------------------------------|-------|---------|---------------------------------|-------|---------|
|                 |            | beta                                      | SE    | p-value | beta                            | SE    | p-value |
| <i>RMST</i>     | rs77864822 | -1.601                                    | 0.564 | 0.005   | -1.627                          | 0.574 | 0.005   |
| <i>WSCD2</i>    | rs1426371  | -0.469                                    | 0.354 | 0.186   | -0.490                          | 0.360 | 0.174   |
| <i>KSR2</i>     | rs34965774 | -0.341                                    | 0.411 | 0.407   | -0.390                          | 0.418 | 0.351   |
| <i>HNF1A</i>    | rs56348580 | 0.260                                     | 0.307 | 0.398   | 0.274                           | 0.313 | 0.382   |
| <i>MPHOSPH9</i> | rs4148856  | 0.212                                     | 0.322 | 0.510   | 0.095                           | 0.327 | 0.771   |
| <i>ZNF664</i>   | rs7978610  | 0.230                                     | 0.290 | 0.429   | 0.246                           | 0.295 | 0.404   |
| <i>FBRSL1</i>   | rs12811407 | 0.262                                     | 0.308 | 0.394   | 0.259                           | 0.313 | 0.407   |
| <i>RNF6</i>     | rs34584161 | 0.541                                     | 0.320 | 0.092   | 0.608                           | 0.325 | 0.062   |
| <i>HMGB1</i>    | rs11842871 | 0.231                                     | 0.349 | 0.508   | 0.285                           | 0.355 | 0.422   |
| <i>KL</i>       | rs576674   | -0.669                                    | 0.351 | 0.057   | -0.592                          | 0.357 | 0.098   |
| <i>DLEU1</i>    | rs963740   | -0.150                                    | 0.313 | 0.633   | -0.127                          | 0.318 | 0.689   |
| <i>PCDH17</i>   | rs9537803  | 0.317                                     | 0.317 | 0.317   | 0.335                           | 0.322 | 0.299   |
| <i>SRGAP2D</i>  | rs9563615  | -0.055                                    | 0.320 | 0.865   | -0.114                          | 0.325 | 0.726   |
| <i>SPRY2</i>    | rs1359790  | 0.427                                     | 0.312 | 0.173   | 0.425                           | 0.318 | 0.181   |
| <i>IRS2</i>     | rs7987740  | 0.160                                     | 0.296 | 0.589   | 0.096                           | 0.301 | 0.751   |
| <i>SLC7A7</i>   | rs17122772 | -0.480                                    | 0.362 | 0.185   | -0.378                          | 0.367 | 0.305   |
| <i>AKAP6</i>    | rs17522122 | -0.317                                    | 0.278 | 0.255   | -0.346                          | 0.284 | 0.223   |
| <i>CLEC14A</i>  | rs8017808  | -0.103                                    | 0.313 | 0.742   | -0.107                          | 0.319 | 0.738   |
| <i>NRXN3</i>    | rs17836088 | 0.292                                     | 0.348 | 0.403   | 0.254                           | 0.354 | 0.474   |
| <i>SMEK1</i>    | rs8010382  | -0.010                                    | 0.299 | 0.974   | -0.004                          | 0.304 | 0.988   |
| <i>MARK3</i>    | rs62007683 | -0.006                                    | 0.291 | 0.984   | 0.002                           | 0.295 | 0.994   |
| <i>RASGRP1</i>  | rs34715063 | -0.388                                    | 0.440 | 0.378   | -0.358                          | 0.447 | 0.423   |
| <i>LTK</i>      | rs11070332 | 0.116                                     | 0.285 | 0.683   | 0.244                           | 0.288 | 0.398   |
| <i>ONECUT1</i>  | rs2456530  | 0.328                                     | 0.439 | 0.456   | 0.329                           | 0.446 | 0.462   |
| <i>C2CD4A/B</i> | rs8037894  | -0.176                                    | 0.282 | 0.533   | -0.224                          | 0.286 | 0.434   |
| <i>USP3</i>     | rs7178762  | 0.246                                     | 0.284 | 0.387   | 0.269                           | 0.288 | 0.351   |
| <i>MAP2K5</i>   | rs4776970  | 0.197                                     | 0.288 | 0.493   | 0.229                           | 0.292 | 0.433   |
| <i>PTPN9</i>    | rs13737    | -0.135                                    | 0.320 | 0.673   | -0.204                          | 0.325 | 0.531   |
| <i>HMG20A</i>   | rs1005752  | 0.061                                     | 0.308 | 0.842   | 0.039                           | 0.314 | 0.900   |
| <i>AP3S2</i>    | rs4932265  | 0.070                                     | 0.325 | 0.830   | 0.097                           | 0.330 | 0.768   |



| Locus         | Variant    | Fasting Adiponectin (adj BMI) -V2 (ug/ml) |       |         | Fasting Adiponectin -V2 (ug/ml) |       |         |
|---------------|------------|-------------------------------------------|-------|---------|---------------------------------|-------|---------|
|               |            | beta                                      | SE    | p-value | beta                            | SE    | p-value |
| <i>PRC1</i>   | rs12910825 | 0.022                                     | 0.288 | 0.940   | -0.047                          | 0.292 | 0.873   |
| <i>ITFG3</i>  | rs6600191  | -0.307                                    | 0.366 | 0.402   | -0.287                          | 0.372 | 0.441   |
| <i>CLUAP1</i> | rs3751837  | 0.003                                     | 0.360 | 0.994   | -0.055                          | 0.366 | 0.880   |
| <i>ATP2A1</i> | rs8046545  | -0.457                                    | 0.302 | 0.130   | -0.547                          | 0.306 | 0.075   |
| <i>FAM57B</i> | rs11642430 | -0.355                                    | 0.297 | 0.232   | -0.382                          | 0.302 | 0.206   |
| <i>FTO</i>    | rs1421085  | 0.227                                     | 0.279 | 0.415   | 0.147                           | 0.283 | 0.605   |
| <i>NFAT5</i>  | rs862320   | 0.352                                     | 0.285 | 0.218   | 0.289                           | 0.290 | 0.320   |
| <i>BCAR1</i>  | rs72802342 | 1.078                                     | 0.552 | 0.052   | 0.955                           | 0.562 | 0.090   |
| <i>CMIP</i>   | rs2925979  | -0.294                                    | 0.306 | 0.338   | -0.215                          | 0.311 | 0.490   |
| <i>SPG7</i>   | rs12920022 | -0.130                                    | 0.411 | 0.753   | -0.168                          | 0.418 | 0.688   |
| <i>ZZEF1</i>  | rs1377807  | -0.255                                    | 0.304 | 0.401   | -0.255                          | 0.309 | 0.409   |
| <i>ATP1B2</i> | rs1641523  | -0.073                                    | 0.295 | 0.805   | -0.109                          | 0.300 | 0.716   |
| <i>GLP2R</i>  | rs7222481  | 0.007                                     | 0.310 | 0.981   | -0.046                          | 0.315 | 0.885   |
| <i>RAI1</i>   | rs4925109  | 0.505                                     | 0.284 | 0.076   | 0.581                           | 0.287 | 0.043   |
| <i>NF1</i>    | rs71372253 | -0.498                                    | 0.526 | 0.345   | -0.518                          | 0.536 | 0.334   |
| <i>HNF1B</i>  | rs10908278 | 0.119                                     | 0.283 | 0.675   | 0.115                           | 0.287 | 0.690   |
| <i>MLX</i>    | rs34855406 | -0.447                                    | 0.321 | 0.164   | -0.355                          | 0.326 | 0.277   |
| <i>TTLL6</i>  | rs35895680 | 0.637                                     | 0.305 | 0.037   | 0.539                           | 0.310 | 0.083   |
| <i>ACE</i>    | rs60276348 | -0.421                                    | 0.360 | 0.243   | -0.446                          | 0.366 | 0.224   |
| <i>BPTF</i>   | rs61676547 | 0.380                                     | 0.336 | 0.259   | 0.442                           | 0.342 | 0.197   |
| <i>LAMA1</i>  | rs7240767  | 0.006                                     | 0.282 | 0.984   | 0.005                           | 0.287 | 0.985   |
| <i>COMMD9</i> | rs62080313 | 0.745                                     | 0.417 | 0.075   | 0.695                           | 0.425 | 0.103   |
| <i>TCF4</i>   | rs72926932 | -0.116                                    | 0.521 | 0.825   | -0.061                          | 0.528 | 0.909   |
| <i>WDR7</i>   | rs17684074 | -0.183                                    | 0.338 | 0.588   | -0.096                          | 0.343 | 0.779   |
| <i>GRP</i>    | rs9957145  | 0.140                                     | 0.402 | 0.728   | 0.052                           | 0.408 | 0.898   |
| <i>MC4R</i>   | rs523288   | 0.196                                     | 0.329 | 0.551   | -0.002                          | 0.329 | 0.995   |
| <i>BCL2A</i>  | rs12454712 | -0.312                                    | 0.338 | 0.356   | -0.248                          | 0.343 | 0.469   |
| <i>UHRF1</i>  | rs7249758  | -0.302                                    | 0.352 | 0.391   | -0.176                          | 0.357 | 0.622   |
| <i>INSR</i>   | rs75253922 | 0.439                                     | 0.361 | 0.224   | 0.375                           | 0.367 | 0.307   |
| <i>MAP2K7</i> | rs4804833  | 0.138                                     | 0.282 | 0.625   | 0.114                           | 0.287 | 0.692   |

| Locus              | Variant     | Fasting Adiponectin (adj BMI) -V2 (ug/ml) |       |         | Fasting Adiponectin -V2 (ug/ml) |       |         |
|--------------------|-------------|-------------------------------------------|-------|---------|---------------------------------|-------|---------|
|                    |             | beta                                      | SE    | p-value | beta                            | SE    | p-value |
| <i>FARSA</i>       | rs3111316   | 0.198                                     | 0.288 | 0.492   | 0.261                           | 0.292 | 0.373   |
| <i>TM6SF2</i>      | rs8107974   | -0.250                                    | 0.556 | 0.653   | -0.284                          | 0.566 | 0.616   |
| <i>PEPD</i>        | rs10406327  | -0.434                                    | 0.277 | 0.117   | -0.440                          | 0.281 | 0.118   |
| <i>TOMM40/APOE</i> | rs429358    | -0.438                                    | 0.436 | 0.315   | -0.413                          | 0.443 | 0.352   |
| <i>GIPR</i>        | rs10406431  | 0.018                                     | 0.285 | 0.951   | -0.034                          | 0.288 | 0.906   |
| <i>ZC3H4</i>       | rs3810291   | 0.204                                     | 0.305 | 0.504   | 0.189                           | 0.311 | 0.543   |
| <i>NKX2.2</i>      | rs13041756  | 1.553                                     | 0.475 | 0.001   | 1.558                           | 0.482 | 0.001   |
| <i>RALY</i>        | rs2268078   | 0.381                                     | 0.301 | 0.207   | 0.344                           | 0.306 | 0.262   |
| <i>EYA2</i>        | rs6063048   | 0.315                                     | 0.331 | 0.342   | 0.280                           | 0.337 | 0.407   |
| <i>CEBPB</i>       | rs11699802  | -0.397                                    | 0.297 | 0.182   | -0.429                          | 0.302 | 0.157   |
| <i>TSHZ2</i>       | rs34454109  | -0.059                                    | 0.341 | 0.863   | -0.113                          | 0.347 | 0.744   |
| <i>GNAS</i>        | rs6070625   | -0.114                                    | 0.280 | 0.684   | -0.032                          | 0.284 | 0.911   |
| <i>TCEA2</i>       | rs59944054  | -0.812                                    | 0.335 | 0.016   | -0.717                          | 0.340 | 0.035   |
| <i>MTMR3/ASCC2</i> | rs6518681   | -0.259                                    | 0.545 | 0.635   | -0.260                          | 0.552 | 0.638   |
| <i>YWHAH</i>       | rs117001013 | 0.252                                     | 0.607 | 0.678   | 0.536                           | 0.614 | 0.383   |
| <i>EP300</i>       | rs5758223   | -0.277                                    | 0.320 | 0.386   | -0.284                          | 0.325 | 0.383   |
| <i>PNPLA3</i>      | rs738408    | 0.337                                     | 0.318 | 0.290   | 0.417                           | 0.323 | 0.197   |
| <i>PIM3</i>        | rs1801645   | 1.042                                     | 0.366 | 0.005   | 0.993                           | 0.373 | 0.008   |

| Locus               | Variant     | Body Fat Percentage - V1 (%) |       |         | Body Fat Percentage - V2 (%) |       |         | BMI - V1 (kg/m2) |       |         |
|---------------------|-------------|------------------------------|-------|---------|------------------------------|-------|---------|------------------|-------|---------|
|                     |             | beta                         | SE    | p-value | beta                         | SE    | p-value | beta             | SE    | p-value |
| <i>MACF1</i>        | rs3768321   | -0.863                       | 0.605 | 0.154   | -0.385                       | 0.480 | 0.422   | -0.732           | 0.422 | 0.083   |
| <i>FAF1</i>         | rs58432198  | 0.783                        | 0.774 | 0.312   | 0.327                        | 0.616 | 0.596   | 0.412            | 0.541 | 0.447   |
| <i>PATJ</i>         | rs12140153  | -0.032                       | 0.885 | 0.971   | 0.140                        | 0.701 | 0.842   | 0.135            | 0.616 | 0.827   |
| <i>PTGFRN</i>       | rs1127215   | -0.307                       | 0.487 | 0.528   | -0.102                       | 0.386 | 0.792   | -0.239           | 0.340 | 0.482   |
| <i>NOTCH2</i>       | rs1493694   | 0.577                        | 0.843 | 0.494   | 0.031                        | 0.670 | 0.964   | 0.583            | 0.588 | 0.322   |
| <i>SEC16B</i>       | rs539515    | 0.867                        | 0.643 | 0.178   | 0.495                        | 0.509 | 0.332   | 0.695            | 0.449 | 0.122   |
| <i>DSTYK</i>        | rs12048743  | -0.384                       | 0.503 | 0.446   | -0.386                       | 0.398 | 0.333   | -0.021           | 0.351 | 0.952   |
| <i>SRGAP2</i>       | rs9430095   | 0.475                        | 0.485 | 0.329   | 0.301                        | 0.385 | 0.435   | 0.125            | 0.339 | 0.712   |
| <i>PROX1</i>        | rs340874    | -0.587                       | 0.494 | 0.235   | -0.732                       | 0.391 | 0.061   | -0.613           | 0.344 | 0.075   |
| <i>LYPLAL1</i>      | rs2820446   | 0.319                        | 0.557 | 0.566   | 0.307                        | 0.440 | 0.486   | 0.307            | 0.387 | 0.429   |
| <i>ABCB10</i>       | rs348330    | 0.501                        | 0.511 | 0.327   | 0.539                        | 0.405 | 0.184   | 0.334            | 0.357 | 0.349   |
| <i>GNG4</i>         | rs291367    | 0.191                        | 0.517 | 0.712   | -0.329                       | 0.411 | 0.423   | -0.150           | 0.360 | 0.678   |
| <i>FAM49A</i>       | rs11680058  | 0.036                        | 0.728 | 0.961   | -0.025                       | 0.576 | 0.965   | 0.046            | 0.508 | 0.927   |
| <i>DTNB</i>         | rs17802463  | -0.259                       | 0.545 | 0.635   | 0.182                        | 0.432 | 0.673   | -0.104           | 0.379 | 0.783   |
| <i>GCKR</i>         | rs1260326   | 0.810                        | 0.484 | 0.094   | 0.766                        | 0.384 | 0.047   | 0.550            | 0.338 | 0.104   |
| <i>THADA</i>        | rs80147536  | -1.489                       | 0.772 | 0.054   | -1.131                       | 0.620 | 0.069   | -0.625           | 0.541 | 0.249   |
| <i>BNIP1</i>        | rs6545714   | 0.912                        | 0.506 | 0.072   | 0.682                        | 0.403 | 0.091   | 0.541            | 0.353 | 0.125   |
| <i>BCL11A</i>       | rs243024    | -0.413                       | 0.491 | 0.401   | -0.344                       | 0.388 | 0.376   | -0.267           | 0.342 | 0.436   |
| <i>CEP68</i>        | rs2249105   | 0.707                        | 0.508 | 0.165   | 0.524                        | 0.403 | 0.193   | 0.509            | 0.355 | 0.152   |
| <i>GLI2</i>         | rs11688682  | 0.776                        | 0.599 | 0.195   | 0.628                        | 0.478 | 0.189   | 0.484            | 0.418 | 0.248   |
| <i>PABPC1P2</i>     | rs35999103  | 0.363                        | 0.631 | 0.565   | 0.313                        | 0.500 | 0.531   | 0.640            | 0.440 | 0.146   |
| <i>CYTIP</i>        | rs13426680  | 0.295                        | 0.998 | 0.767   | -0.016                       | 0.783 | 0.984   | 0.184            | 0.694 | 0.791   |
| <i>RBMS1</i>        | rs3772071   | -0.151                       | 0.539 | 0.780   | -0.321                       | 0.426 | 0.452   | -0.052           | 0.377 | 0.889   |
| <i>GRB14/COBLL1</i> | rs10195252  | -0.168                       | 0.530 | 0.751   | 0.025                        | 0.417 | 0.952   | -0.125           | 0.369 | 0.736   |
| <i>G6PC2</i>        | rs1402837   | 0.325                        | 0.562 | 0.564   | 0.051                        | 0.447 | 0.910   | -0.010           | 0.393 | 0.980   |
| <i>CRYBA2</i>       | rs113414093 | 2.909                        | 1.953 | 0.137   | 1.430                        | 1.632 | 0.381   | 1.639            | 1.345 | 0.223   |
| <i>IRS1</i>         | rs2972144   | 0.703                        | 0.531 | 0.186   | 0.373                        | 0.420 | 0.376   | 0.536            | 0.370 | 0.148   |
| <i>PPARG</i>        | rs11709077  | -0.855                       | 0.802 | 0.287   | -0.879                       | 0.629 | 0.163   | -0.485           | 0.557 | 0.384   |

| Locus          | Variant    | Body Fat Percentage - V1 (%) |       |         | Body Fat Percentage - V2 (%) |       |         | BMI - V1 (kg/m2) |       |         |
|----------------|------------|------------------------------|-------|---------|------------------------------|-------|---------|------------------|-------|---------|
|                |            | beta                         | SE    | p-value | beta                         | SE    | p-value | beta             | SE    | p-value |
| <i>UBE2E2</i>  | rs35352848 | -0.011                       | 0.596 | 0.985   | -0.045                       | 0.471 | 0.924   | 0.057            | 0.416 | 0.891   |
| <i>KIF9</i>    | rs11926707 | 0.269                        | 0.514 | 0.600   | 0.118                        | 0.408 | 0.772   | 0.065            | 0.359 | 0.856   |
| <i>RBM6</i>    | rs4688760  | 0.619                        | 0.545 | 0.257   | 0.550                        | 0.433 | 0.204   | 0.380            | 0.379 | 0.316   |
| <i>RFT1</i>    | rs2581787  | 0.223                        | 0.495 | 0.653   | 0.297                        | 0.394 | 0.451   | 0.279            | 0.346 | 0.419   |
| <i>PSMD6</i>   | rs3774723  | -0.556                       | 0.687 | 0.419   | -0.296                       | 0.545 | 0.587   | -0.133           | 0.476 | 0.781   |
| <i>ADAMTS9</i> | rs9860730  | -0.312                       | 0.514 | 0.545   | -0.174                       | 0.409 | 0.670   | -0.355           | 0.359 | 0.322   |
| <i>SHQ1</i>    | rs13085136 | 3.743                        | 1.254 | 0.003   | 2.950                        | 0.982 | 0.003   | 2.555            | 0.871 | 0.003   |
| <i>ROBO2</i>   | rs2272163  | 0.536                        | 0.498 | 0.282   | 0.470                        | 0.397 | 0.237   | 0.477            | 0.348 | 0.171   |
| <i>ADCY5</i>   | rs11708067 | 1.185                        | 0.601 | 0.049   | 0.900                        | 0.476 | 0.059   | 0.723            | 0.421 | 0.086   |
| <i>SLC12A8</i> | rs649961   | -0.829                       | 0.491 | 0.092   | -0.450                       | 0.390 | 0.249   | -0.529           | 0.342 | 0.122   |
| <i>TMCC1</i>   | rs9828772  | 0.545                        | 0.891 | 0.541   | 1.041                        | 0.707 | 0.141   | 0.430            | 0.623 | 0.490   |
| <i>TSC22D2</i> | rs62271373 | -0.838                       | 0.878 | 0.340   | -0.768                       | 0.695 | 0.270   | -0.364           | 0.615 | 0.554   |
| <i>MBNL1</i>   | rs13065698 | 0.782                        | 0.510 | 0.126   | 0.468                        | 0.403 | 0.246   | 0.227            | 0.356 | 0.523   |
| <i>EGFEM1P</i> | rs7629630  | -0.609                       | 0.696 | 0.382   | -0.091                       | 0.555 | 0.870   | -0.036           | 0.486 | 0.942   |
| <i>SLC2A2</i>  | rs9873618  | 0.719                        | 0.546 | 0.189   | 0.610                        | 0.431 | 0.158   | 0.517            | 0.381 | 0.175   |
| <i>ABCC5</i>   | rs2872246  | 0.893                        | 0.474 | 0.060   | 0.618                        | 0.375 | 0.100   | 0.489            | 0.331 | 0.140   |
| <i>IGF2BP2</i> | rs6780171  | -0.074                       | 0.534 | 0.891   | -0.063                       | 0.423 | 0.881   | -0.215           | 0.372 | 0.564   |
| <i>ST6GAL1</i> | rs3887925  | -1.081                       | 0.491 | 0.028   | -1.007                       | 0.389 | 0.010   | -0.627           | 0.342 | 0.067   |
| <i>LPP</i>     | rs4686471  | 0.161                        | 0.511 | 0.753   | 0.212                        | 0.406 | 0.602   | 0.222            | 0.357 | 0.533   |
| <i>MAEA</i>    | rs56337234 | -0.618                       | 0.541 | 0.254   | -0.675                       | 0.428 | 0.116   | -0.041           | 0.379 | 0.914   |
| <i>HTT</i>     | rs362307   | 0.676                        | 0.980 | 0.490   | 0.423                        | 0.773 | 0.584   | 0.511            | 0.685 | 0.456   |
| <i>WFS1</i>    | rs10937721 | 0.593                        | 0.494 | 0.230   | 0.533                        | 0.391 | 0.173   | 0.208            | 0.345 | 0.547   |
| <i>LCORL</i>   | rs12640250 | -0.346                       | 0.575 | 0.547   | -0.353                       | 0.455 | 0.438   | -0.116           | 0.400 | 0.771   |
| <i>GNPDA2</i>  | rs10938398 | 1.082                        | 0.488 | 0.027   | 0.695                        | 0.387 | 0.073   | 0.544            | 0.341 | 0.111   |
| <i>USP46</i>   | rs2102278  | 0.020                        | 0.541 | 0.971   | -0.076                       | 0.432 | 0.860   | -0.174           | 0.378 | 0.645   |
| <i>SCD5</i>    | rs12642790 | -0.130                       | 0.525 | 0.804   | -0.356                       | 0.416 | 0.393   | -0.124           | 0.366 | 0.736   |
| <i>FAM13A</i>  | rs1903002  | -0.323                       | 0.498 | 0.518   | -0.317                       | 0.399 | 0.427   | -0.256           | 0.349 | 0.463   |
| <i>SMARCA1</i> | rs6821438  | 0.483                        | 0.506 | 0.340   | 0.334                        | 0.398 | 0.402   | 0.317            | 0.353 | 0.369   |
| <i>SLC9B1</i>  | rs1580278  | -0.026                       | 0.506 | 0.958   | 0.026                        | 0.399 | 0.947   | -0.236           | 0.352 | 0.503   |
| <i>PABPC4L</i> | rs1296328  | 0.481                        | 0.514 | 0.350   | 0.464                        | 0.410 | 0.257   | 0.265            | 0.360 | 0.461   |

| Locus          | Variant    | Body Fat Percentage - V1 (%) |       |         | Body Fat Percentage - V2 (%) |       |         | BMI - V1 (kg/m2) |       |         |
|----------------|------------|------------------------------|-------|---------|------------------------------|-------|---------|------------------|-------|---------|
|                |            | beta                         | SE    | p-value | beta                         | SE    | p-value | beta             | SE    | p-value |
| <i>TMEM154</i> | rs7669833  | 0.068                        | 0.529 | 0.898   | 0.084                        | 0.421 | 0.842   | 0.271            | 0.370 | 0.463   |
| <i>PDGFC</i>   | rs28819812 | -0.687                       | 0.526 | 0.192   | -0.776                       | 0.418 | 0.064   | -0.589           | 0.367 | 0.109   |
| <i>ACSL1</i>   | rs58730668 | -0.466                       | 0.731 | 0.524   | -0.562                       | 0.577 | 0.331   | -0.135           | 0.511 | 0.792   |
| <i>MRPS30</i>  | rs6884702  | 1.081                        | 0.497 | 0.030   | 0.839                        | 0.396 | 0.034   | 0.660            | 0.348 | 0.058   |
| <i>ITGA1</i>   | rs3811978  | 0.510                        | 0.663 | 0.442   | 0.348                        | 0.525 | 0.508   | 0.341            | 0.463 | 0.461   |
| <i>ARL15</i>   | rs702634   | 0.050                        | 0.538 | 0.926   | 0.073                        | 0.429 | 0.864   | 0.130            | 0.376 | 0.730   |
| <i>ANKRD55</i> | rs465002   | 0.412                        | 0.541 | 0.447   | 0.247                        | 0.428 | 0.565   | 0.257            | 0.378 | 0.496   |
| <i>PIK3R1</i>  | rs4976033  | 0.777                        | 0.483 | 0.108   | 0.911                        | 0.383 | 0.018   | 0.708            | 0.337 | 0.036   |
| <i>POC5</i>    | rs2307111  | 0.208                        | 0.485 | 0.668   | 0.174                        | 0.387 | 0.654   | 0.384            | 0.338 | 0.256   |
| <i>ZBED3</i>   | rs4457053  | -0.663                       | 0.532 | 0.213   | -0.412                       | 0.423 | 0.330   | -0.387           | 0.372 | 0.299   |
| <i>DMGDH</i>   | rs1316776  | -0.143                       | 0.524 | 0.784   | -0.124                       | 0.416 | 0.766   | -0.252           | 0.366 | 0.492   |
| <i>RASA1</i>   | rs7719891  | 0.392                        | 0.529 | 0.458   | 0.505                        | 0.418 | 0.227   | -0.087           | 0.367 | 0.812   |
| <i>PCSK1</i>   | rs13179048 | 0.225                        | 0.525 | 0.669   | -0.018                       | 0.419 | 0.965   | 0.089            | 0.366 | 0.808   |
| <i>PHF15</i>   | rs329122   | 0.449                        | 0.515 | 0.383   | 0.340                        | 0.407 | 0.404   | 0.185            | 0.360 | 0.607   |
| <i>EBF1</i>    | rs3934712  | -0.490                       | 0.593 | 0.409   | 0.111                        | 0.470 | 0.814   | -0.098           | 0.415 | 0.813   |
| <i>RREB1</i>   | rs9379084  | 0.217                        | 0.805 | 0.788   | 0.117                        | 0.643 | 0.856   | -0.059           | 0.563 | 0.917   |
| <i>CDKAL1</i>  | rs7756992  | -0.190                       | 0.550 | 0.730   | -0.323                       | 0.436 | 0.459   | -0.208           | 0.384 | 0.588   |
| <i>MHC</i>     | rs601945   | 0.075                        | 0.733 | 0.918   | 0.426                        | 0.577 | 0.461   | 0.071            | 0.511 | 0.889   |
| <i>LRFN2</i>   | rs34298980 | -0.783                       | 0.522 | 0.134   | -0.514                       | 0.414 | 0.215   | -0.595           | 0.364 | 0.103   |
| <i>VEGFA</i>   | rs6458354  | -0.439                       | 0.556 | 0.430   | -0.603                       | 0.439 | 0.170   | -0.341           | 0.388 | 0.380   |
| <i>TFAP2B</i>  | rs3798519  | 0.739                        | 0.633 | 0.244   | 0.499                        | 0.502 | 0.321   | 0.671            | 0.442 | 0.130   |
| <i>BEND3</i>   | rs4946812  | 0.383                        | 0.555 | 0.491   | 0.328                        | 0.443 | 0.460   | 0.296            | 0.388 | 0.446   |
| <i>CENPW</i>   | rs11759026 | 0.072                        | 0.604 | 0.905   | 0.284                        | 0.478 | 0.552   | 0.246            | 0.421 | 0.559   |
| <i>SOGA3</i>   | rs2800733  | 0.060                        | 0.556 | 0.915   | 0.131                        | 0.442 | 0.767   | 0.171            | 0.389 | 0.660   |
| <i>SLC35D3</i> | rs9494624  | -0.468                       | 0.559 | 0.403   | -0.497                       | 0.444 | 0.264   | -0.335           | 0.390 | 0.391   |
| <i>MIR3668</i> | rs2982521  | -0.325                       | 0.511 | 0.525   | -0.119                       | 0.406 | 0.770   | 0.109            | 0.358 | 0.762   |
| <i>SLC22A3</i> | rs474513   | -0.424                       | 0.497 | 0.394   | -0.274                       | 0.394 | 0.487   | -0.127           | 0.347 | 0.715   |
| <i>QKI</i>     | rs4709746  | 0.384                        | 0.720 | 0.594   | 0.300                        | 0.570 | 0.599   | 0.449            | 0.502 | 0.372   |
| <i>DGKB</i>    | rs10228066 | 0.883                        | 0.493 | 0.074   | 0.467                        | 0.394 | 0.237   | 0.607            | 0.344 | 0.078   |
| <i>IGF2BP3</i> | rs4279506  | -0.446                       | 0.496 | 0.369   | -0.405                       | 0.393 | 0.303   | -0.008           | 0.345 | 0.982   |

| Locus           | Variant    | Body Fat Percentage - V1 (%) |       |         | Body Fat Percentage - V2 (%) |       |         | BMI - V1 (kg/m2) |       |         |
|-----------------|------------|------------------------------|-------|---------|------------------------------|-------|---------|------------------|-------|---------|
|                 |            | beta                         | SE    | p-value | beta                         | SE    | p-value | beta             | SE    | p-value |
| <i>JAZF1</i>    | rs1708302  | -0.300                       | 0.483 | 0.534   | -0.237                       | 0.385 | 0.538   | -0.162           | 0.338 | 0.632   |
| <i>CRHR2</i>    | rs917195   | 0.690                        | 0.575 | 0.230   | 0.611                        | 0.460 | 0.184   | 0.616            | 0.401 | 0.125   |
| <i>GCK</i>      | rs878521   | -0.545                       | 0.564 | 0.334   | -0.511                       | 0.446 | 0.253   | -0.261           | 0.394 | 0.508   |
| <i>FBXL13</i>   | rs11496066 | -0.006                       | 0.655 | 0.993   | 0.098                        | 0.515 | 0.850   | 0.144            | 0.454 | 0.750   |
| <i>RELN</i>     | rs39328    | 0.173                        | 0.506 | 0.733   | 0.428                        | 0.401 | 0.287   | -0.139           | 0.353 | 0.694   |
| <i>CTTNBP2</i>  | rs6976111  | -0.608                       | 0.541 | 0.262   | -0.349                       | 0.431 | 0.419   | -0.264           | 0.378 | 0.485   |
| <i>KLF14</i>    | rs1562396  | 0.409                        | 0.543 | 0.452   | 0.362                        | 0.430 | 0.400   | -0.079           | 0.378 | 0.834   |
| <i>AOC1</i>     | rs62492368 | -0.137                       | 0.535 | 0.798   | -0.186                       | 0.421 | 0.659   | -0.216           | 0.372 | 0.562   |
| <i>MNX1</i>     | rs6459733  | 0.626                        | 0.496 | 0.208   | 0.158                        | 0.395 | 0.690   | 0.199            | 0.346 | 0.566   |
| <i>PPP1R3B</i>  | rs4841132  | -1.699                       | 0.949 | 0.074   | -1.204                       | 0.752 | 0.110   | -0.866           | 0.661 | 0.191   |
| <i>MSRA</i>     | rs17689007 | -0.288                       | 0.475 | 0.544   | -0.295                       | 0.377 | 0.434   | -0.220           | 0.331 | 0.506   |
| <i>XKR6</i>     | rs57327348 | -0.470                       | 0.668 | 0.482   | -0.430                       | 0.530 | 0.417   | -0.109           | 0.470 | 0.817   |
| <i>LPL</i>      | rs10096633 | -0.048                       | 0.728 | 0.948   | -0.276                       | 0.576 | 0.632   | -0.049           | 0.508 | 0.923   |
| <i>PURG</i>     | rs10954772 | 1.308                        | 0.527 | 0.013   | 0.819                        | 0.415 | 0.049   | 0.533            | 0.366 | 0.146   |
| <i>ANK1</i>     | rs13262861 | 0.338                        | 0.607 | 0.578   | 0.311                        | 0.484 | 0.520   | 0.146            | 0.424 | 0.731   |
| <i>TP53INP1</i> | rs10097617 | 0.255                        | 0.498 | 0.609   | 0.228                        | 0.395 | 0.563   | 0.203            | 0.347 | 0.558   |
| <i>TRHR</i>     | rs12680028 | 0.667                        | 0.496 | 0.179   | 0.347                        | 0.394 | 0.379   | 0.573            | 0.346 | 0.098   |
| <i>SLC30A8</i>  | rs3802177  | -0.165                       | 0.543 | 0.762   | -0.304                       | 0.428 | 0.477   | -0.304           | 0.378 | 0.421   |
| <i>CASC11</i>   | rs17772814 | 0.060                        | 0.929 | 0.948   | -0.253                       | 0.730 | 0.729   | -0.224           | 0.647 | 0.729   |
| <i>PVT1</i>     | rs1561927  | -0.428                       | 0.540 | 0.428   | -0.201                       | 0.431 | 0.641   | -0.174           | 0.377 | 0.645   |
| <i>BOP1</i>     | rs4977213  | -0.132                       | 0.493 | 0.789   | -0.273                       | 0.392 | 0.486   | -0.060           | 0.343 | 0.862   |
| <i>GLIS3</i>    | rs10974438 | 0.435                        | 0.514 | 0.398   | 0.314                        | 0.408 | 0.442   | 0.082            | 0.359 | 0.819   |
| <i>HAUS6</i>    | rs7022807  | 0.773                        | 0.501 | 0.123   | 0.501                        | 0.401 | 0.211   | 0.240            | 0.350 | 0.494   |
| <i>FOCAD</i>    | rs7867635  | 0.325                        | 0.503 | 0.519   | 0.183                        | 0.400 | 0.648   | 0.187            | 0.352 | 0.595   |
| <i>CDKN2A/B</i> | rs10811660 | -0.616                       | 0.664 | 0.354   | -0.419                       | 0.526 | 0.426   | -0.222           | 0.464 | 0.633   |
| <i>LINGO2</i>   | rs1412234  | 0.125                        | 0.530 | 0.814   | -0.026                       | 0.420 | 0.951   | -0.060           | 0.370 | 0.872   |
| <i>UBAP2</i>    | rs12001437 | 0.233                        | 0.494 | 0.637   | 0.329                        | 0.391 | 0.400   | 0.184            | 0.345 | 0.594   |
| <i>MTND2P8</i>  | rs11137820 | 0.057                        | 0.491 | 0.908   | -0.372                       | 0.389 | 0.339   | 0.217            | 0.342 | 0.525   |
| <i>TLE4</i>     | rs17791513 | 1.202                        | 1.056 | 0.255   | 0.661                        | 0.843 | 0.434   | 0.647            | 0.739 | 0.381   |
| <i>TLE1</i>     | rs2796441  | -0.564                       | 0.479 | 0.239   | -0.526                       | 0.380 | 0.167   | -0.190           | 0.335 | 0.571   |

| Locus                | Variant    | Body Fat Percentage - V1 (%) |       |         | Body Fat Percentage - V2 (%) |       |         | BMI - V1 (kg/m2) |       |         |
|----------------------|------------|------------------------------|-------|---------|------------------------------|-------|---------|------------------|-------|---------|
|                      |            | beta                         | SE    | p-value | beta                         | SE    | p-value | beta             | SE    | p-value |
| <i>ZNF169</i>        | rs55653563 | 0.224                        | 0.549 | 0.683   | 0.302                        | 0.435 | 0.487   | 0.228            | 0.384 | 0.552   |
| <i>ABO</i>           | rs505922   | -0.140                       | 0.509 | 0.784   | -0.191                       | 0.403 | 0.635   | -0.207           | 0.355 | 0.559   |
| <i>GPSM1</i>         | rs28505901 | -0.508                       | 0.628 | 0.418   | -0.251                       | 0.497 | 0.615   | -0.283           | 0.438 | 0.519   |
| <i>CDC123/CAMK1D</i> | rs11257655 | 0.346                        | 0.617 | 0.576   | 0.576                        | 0.489 | 0.239   | 0.516            | 0.431 | 0.232   |
| <i>HKDC1</i>         | rs4746822  | 0.951                        | 0.508 | 0.062   | 0.716                        | 0.402 | 0.076   | 0.526            | 0.354 | 0.138   |
| <i>NEUROG3</i>       | rs2642588  | 0.245                        | 0.538 | 0.649   | 0.287                        | 0.427 | 0.502   | 0.134            | 0.375 | 0.720   |
| <i>ZMIZ1</i>         | rs703972   | -0.332                       | 0.512 | 0.518   | -0.203                       | 0.406 | 0.617   | 0.040            | 0.358 | 0.911   |
| <i>PTEN</i>          | rs11202627 | -0.763                       | 0.689 | 0.269   | -0.549                       | 0.552 | 0.320   | -0.088           | 0.482 | 0.856   |
| <i>HHEX/IDE</i>      | rs10882101 | 0.153                        | 0.497 | 0.759   | 0.087                        | 0.394 | 0.825   | 0.267            | 0.346 | 0.440   |
| <i>TCF7L2</i>        | rs7903146  | 0.224                        | 0.515 | 0.664   | 0.044                        | 0.407 | 0.914   | -0.124           | 0.360 | 0.731   |
| <i>WDR11</i>         | rs72631105 | 0.121                        | 0.660 | 0.855   | 0.190                        | 0.519 | 0.714   | 0.247            | 0.458 | 0.590   |
| <i>PLEKHA1</i>       | rs2280141  | 0.643                        | 0.497 | 0.196   | 0.543                        | 0.392 | 0.167   | 0.313            | 0.346 | 0.367   |
| <i>INS/IGF2</i>      | rs4929965  | 0.493                        | 0.504 | 0.328   | 0.511                        | 0.398 | 0.200   | 0.373            | 0.351 | 0.288   |
| <i>KCNQ1</i>         | rs2237895  | 0.105                        | 0.477 | 0.826   | 0.025                        | 0.378 | 0.948   | -0.224           | 0.333 | 0.501   |
| <i>KCNJ11</i>        | rs5213     | -0.394                       | 0.533 | 0.461   | -0.478                       | 0.426 | 0.263   | 0.074            | 0.372 | 0.843   |
| <i>METTL15</i>       | rs4923543  | -0.746                       | 0.541 | 0.168   | -0.483                       | 0.426 | 0.258   | -0.537           | 0.376 | 0.154   |
| <i>PDHX</i>          | rs2767036  | -0.582                       | 0.536 | 0.278   | -0.504                       | 0.426 | 0.237   | -0.165           | 0.374 | 0.660   |
| <i>HSD17B12</i>      | rs1061810  | 0.391                        | 0.551 | 0.479   | 0.370                        | 0.437 | 0.398   | 0.001            | 0.385 | 0.998   |
| <i>CRY2</i>          | rs7115753  | -0.241                       | 0.504 | 0.633   | -0.374                       | 0.399 | 0.349   | 0.030            | 0.351 | 0.933   |
| <i>CELF1</i>         | rs7124681  | -0.294                       | 0.480 | 0.541   | -0.292                       | 0.381 | 0.444   | -0.203           | 0.335 | 0.545   |
| <i>MAP3K11</i>       | rs1783541  | 0.564                        | 0.650 | 0.386   | 0.017                        | 0.519 | 0.974   | 0.557            | 0.453 | 0.220   |
| <i>CENTD2/ARAP1</i>  | rs77464186 | 0.598                        | 0.701 | 0.394   | 0.605                        | 0.561 | 0.281   | 0.465            | 0.490 | 0.343   |
| <i>MTNR1B</i>        | rs10830963 | 0.806                        | 0.547 | 0.141   | 0.723                        | 0.434 | 0.097   | 0.738            | 0.382 | 0.053   |
| <i>ETS1</i>          | rs67232546 | -0.816                       | 0.594 | 0.170   | -0.661                       | 0.472 | 0.162   | -0.602           | 0.413 | 0.145   |
| <i>CDKN1B</i>        | rs2066827  | -0.789                       | 0.765 | 0.303   | -0.966                       | 0.605 | 0.111   | -0.399           | 0.534 | 0.456   |
| <i>ITPR2</i>         | rs718314   | -0.688                       | 0.566 | 0.225   | -0.723                       | 0.450 | 0.109   | -0.312           | 0.396 | 0.430   |
| <i>KLHDC5</i>        | rs10842994 | 0.016                        | 0.602 | 0.979   | 0.008                        | 0.477 | 0.987   | -0.234           | 0.418 | 0.575   |
| <i>HMGA2</i>         | rs2258238  | -0.429                       | 0.778 | 0.581   | -0.638                       | 0.616 | 0.301   | -0.443           | 0.542 | 0.415   |
| <i>TSPAN8/LGR5</i>   | rs1796330  | 0.286                        | 0.502 | 0.569   | 0.127                        | 0.399 | 0.750   | 0.099            | 0.351 | 0.778   |
| <i>USP44</i>         | rs2197973  | 0.679                        | 0.480 | 0.158   | 0.611                        | 0.382 | 0.111   | 0.481            | 0.336 | 0.153   |

| Locus           | Variant    | Body Fat Percentage - V1 (%) |       |         | Body Fat Percentage - V2 (%) |       |         | BMI - V1 (kg/m2) |       |         |
|-----------------|------------|------------------------------|-------|---------|------------------------------|-------|---------|------------------|-------|---------|
|                 |            | beta                         | SE    | p-value | beta                         | SE    | p-value | beta             | SE    | p-value |
| <i>RMST</i>     | rs77864822 | 0.423                        | 0.998 | 0.672   | 0.612                        | 0.791 | 0.439   | 0.017            | 0.695 | 0.981   |
| <i>WSCD2</i>    | rs1426371  | 0.283                        | 0.619 | 0.648   | 0.329                        | 0.493 | 0.505   | 0.120            | 0.432 | 0.781   |
| <i>KSR2</i>     | rs34965774 | 0.327                        | 0.710 | 0.646   | 0.198                        | 0.569 | 0.728   | 0.331            | 0.496 | 0.505   |
| <i>HNF1A</i>    | rs56348580 | -0.215                       | 0.536 | 0.689   | -0.350                       | 0.425 | 0.410   | 0.079            | 0.375 | 0.833   |
| <i>MPHOSPH9</i> | rs4148856  | 0.360                        | 0.563 | 0.523   | 0.428                        | 0.443 | 0.334   | 0.474            | 0.391 | 0.225   |
| <i>ZNF664</i>   | rs7978610  | -0.405                       | 0.505 | 0.424   | -0.470                       | 0.401 | 0.241   | -0.133           | 0.353 | 0.707   |
| <i>FBRSL1</i>   | rs12811407 | 0.408                        | 0.533 | 0.444   | 0.340                        | 0.426 | 0.425   | -0.010           | 0.372 | 0.978   |
| <i>RNF6</i>     | rs34584161 | -0.667                       | 0.558 | 0.233   | -0.513                       | 0.442 | 0.246   | -0.436           | 0.390 | 0.264   |
| <i>HMGB1</i>    | rs11842871 | -0.384                       | 0.605 | 0.526   | -0.332                       | 0.482 | 0.492   | -0.341           | 0.423 | 0.420   |
| <i>KL</i>       | rs576674   | 0.127                        | 0.613 | 0.836   | -0.165                       | 0.485 | 0.734   | -0.068           | 0.428 | 0.873   |
| <i>DLEU1</i>    | rs963740   | -0.240                       | 0.547 | 0.661   | 0.014                        | 0.433 | 0.975   | -0.173           | 0.381 | 0.650   |
| <i>PCDH17</i>   | rs9537803  | 0.251                        | 0.553 | 0.650   | -0.128                       | 0.438 | 0.770   | 0.022            | 0.386 | 0.955   |
| <i>SRGAP2D</i>  | rs9563615  | 0.240                        | 0.560 | 0.669   | 0.490                        | 0.443 | 0.269   | 0.237            | 0.390 | 0.543   |
| <i>SPRY2</i>    | rs1359790  | 0.300                        | 0.546 | 0.583   | 0.120                        | 0.432 | 0.781   | 0.169            | 0.381 | 0.657   |
| <i>IRS2</i>     | rs7987740  | 0.285                        | 0.516 | 0.581   | 0.322                        | 0.408 | 0.431   | 0.340            | 0.359 | 0.345   |
| <i>SLC7A7</i>   | rs17122772 | -0.762                       | 0.630 | 0.227   | -0.829                       | 0.499 | 0.097   | -0.462           | 0.440 | 0.294   |
| <i>AKAP6</i>    | rs17522122 | 0.365                        | 0.492 | 0.458   | 0.234                        | 0.390 | 0.549   | 0.105            | 0.343 | 0.760   |
| <i>CLEC14A</i>  | rs8017808  | -0.305                       | 0.546 | 0.577   | -0.317                       | 0.434 | 0.465   | 0.083            | 0.380 | 0.827   |
| <i>NRXN3</i>    | rs17836088 | -0.209                       | 0.607 | 0.731   | -0.295                       | 0.481 | 0.539   | 0.317            | 0.424 | 0.455   |
| <i>SMEK1</i>    | rs8010382  | 0.418                        | 0.520 | 0.421   | 0.388                        | 0.413 | 0.348   | 0.180            | 0.363 | 0.620   |
| <i>MARK3</i>    | rs62007683 | -0.541                       | 0.504 | 0.284   | -0.326                       | 0.401 | 0.417   | -0.310           | 0.352 | 0.380   |
| <i>RASGRP1</i>  | rs34715063 | -0.290                       | 0.764 | 0.704   | -0.559                       | 0.607 | 0.357   | -0.127           | 0.534 | 0.812   |
| <i>LTK</i>      | rs11070332 | -0.780                       | 0.494 | 0.114   | -0.727                       | 0.392 | 0.064   | -0.714           | 0.343 | 0.038   |
| <i>ONECUT1</i>  | rs2456530  | 0.000                        | 0.763 | 1.000   | 0.265                        | 0.608 | 0.664   | 0.054            | 0.534 | 0.920   |
| <i>C2CD4A/B</i> | rs8037894  | 0.274                        | 0.489 | 0.575   | 0.073                        | 0.385 | 0.850   | 0.306            | 0.342 | 0.372   |
| <i>USP3</i>     | rs7178762  | -0.478                       | 0.495 | 0.335   | -0.387                       | 0.392 | 0.324   | -0.177           | 0.345 | 0.609   |
| <i>MAP2K5</i>   | rs4776970  | 0.011                        | 0.499 | 0.982   | -0.062                       | 0.397 | 0.876   | -0.165           | 0.349 | 0.637   |
| <i>PTPN9</i>    | rs13737    | 0.338                        | 0.560 | 0.546   | 0.437                        | 0.441 | 0.322   | 0.236            | 0.389 | 0.545   |
| <i>HMG20A</i>   | rs1005752  | 0.384                        | 0.540 | 0.477   | 0.110                        | 0.426 | 0.797   | 0.284            | 0.375 | 0.450   |
| <i>AP3S2</i>    | rs4932265  | 0.185                        | 0.564 | 0.743   | -0.047                       | 0.450 | 0.918   | -0.066           | 0.394 | 0.868   |



| Locus         | Variant    | Body Fat Percentage - V1 (%) |       |         | Body Fat Percentage - V2 (%) |       |         | BMI - V1 (kg/m2) |       |         |
|---------------|------------|------------------------------|-------|---------|------------------------------|-------|---------|------------------|-------|---------|
|               |            | beta                         | SE    | p-value | beta                         | SE    | p-value | beta             | SE    | p-value |
| <i>PRC1</i>   | rs12910825 | -0.279                       | 0.499 | 0.576   | 0.004                        | 0.399 | 0.992   | 0.124            | 0.349 | 0.722   |
| <i>ITFG3</i>  | rs6600191  | -0.302                       | 0.638 | 0.636   | 0.162                        | 0.504 | 0.749   | -0.034           | 0.445 | 0.939   |
| <i>CLUAP1</i> | rs3751837  | -0.016                       | 0.622 | 0.980   | 0.219                        | 0.494 | 0.658   | 0.344            | 0.435 | 0.429   |
| <i>ATP2A1</i> | rs8046545  | 0.570                        | 0.525 | 0.277   | 0.517                        | 0.414 | 0.212   | 0.536            | 0.366 | 0.143   |
| <i>FAM57B</i> | rs11642430 | 0.234                        | 0.520 | 0.653   | 0.172                        | 0.412 | 0.677   | 0.232            | 0.362 | 0.521   |
| <i>FTO</i>    | rs1421085  | 0.841                        | 0.483 | 0.082   | 0.749                        | 0.382 | 0.051   | 0.556            | 0.337 | 0.100   |
| <i>NFAT5</i>  | rs862320   | 0.077                        | 0.495 | 0.876   | 0.154                        | 0.392 | 0.695   | 0.178            | 0.345 | 0.607   |
| <i>BCAR1</i>  | rs72802342 | 0.509                        | 0.959 | 0.596   | 0.248                        | 0.764 | 0.746   | 0.340            | 0.668 | 0.611   |
| <i>CMIP</i>   | rs2925979  | -0.284                       | 0.538 | 0.598   | -0.065                       | 0.426 | 0.879   | -0.493           | 0.372 | 0.186   |
| <i>SPG7</i>   | rs12920022 | 0.613                        | 0.715 | 0.392   | 0.345                        | 0.568 | 0.543   | 0.245            | 0.500 | 0.625   |
| <i>ZZEF1</i>  | rs1377807  | 0.141                        | 0.529 | 0.790   | 0.140                        | 0.418 | 0.738   | 0.169            | 0.370 | 0.647   |
| <i>ATP1B2</i> | rs1641523  | 0.457                        | 0.514 | 0.374   | 0.352                        | 0.406 | 0.387   | 0.124            | 0.359 | 0.729   |
| <i>GLP2R</i>  | rs7222481  | 0.740                        | 0.542 | 0.172   | 0.671                        | 0.428 | 0.118   | 0.426            | 0.377 | 0.259   |
| <i>RAI1</i>   | rs4925109  | -0.754                       | 0.491 | 0.125   | -0.663                       | 0.388 | 0.088   | -0.506           | 0.343 | 0.141   |
| <i>NF1</i>    | rs71372253 | 0.294                        | 0.917 | 0.749   | 0.441                        | 0.730 | 0.546   | 0.175            | 0.642 | 0.785   |
| <i>HNF1B</i>  | rs10908278 | -0.183                       | 0.491 | 0.710   | -0.215                       | 0.393 | 0.585   | -0.024           | 0.344 | 0.945   |
| <i>MLX</i>    | rs34855406 | -0.460                       | 0.558 | 0.410   | -0.406                       | 0.443 | 0.360   | -0.362           | 0.389 | 0.353   |
| <i>TTL6</i>   | rs35895680 | 0.477                        | 0.530 | 0.369   | 0.531                        | 0.419 | 0.205   | 0.327            | 0.370 | 0.378   |
| <i>ACE</i>    | rs60276348 | 0.277                        | 0.628 | 0.660   | 0.167                        | 0.497 | 0.738   | 0.164            | 0.439 | 0.709   |
| <i>BPTF</i>   | rs61676547 | -0.073                       | 0.588 | 0.901   | -0.218                       | 0.465 | 0.639   | -0.307           | 0.411 | 0.455   |
| <i>LAMA1</i>  | rs7240767  | 0.112                        | 0.495 | 0.821   | 0.018                        | 0.389 | 0.962   | 0.146            | 0.344 | 0.672   |
| <i>COMMD9</i> | rs62080313 | 0.430                        | 0.728 | 0.555   | 0.674                        | 0.576 | 0.243   | 0.055            | 0.509 | 0.914   |
| <i>TCF4</i>   | rs72926932 | -0.843                       | 0.906 | 0.353   | -1.032                       | 0.720 | 0.152   | -0.453           | 0.634 | 0.475   |
| <i>WDR7</i>   | rs17684074 | -1.017                       | 0.578 | 0.079   | -0.456                       | 0.466 | 0.328   | -0.828           | 0.404 | 0.041   |
| <i>GRP</i>    | rs9957145  | 0.562                        | 0.705 | 0.426   | 0.453                        | 0.553 | 0.413   | 0.546            | 0.488 | 0.263   |
| <i>MC4R</i>   | rs523288   | 1.525                        | 0.561 | 0.007   | 0.948                        | 0.450 | 0.035   | 1.146            | 0.390 | 0.003   |
| <i>BCL2A</i>  | rs12454712 | -0.457                       | 0.591 | 0.440   | -0.445                       | 0.467 | 0.341   | -0.249           | 0.411 | 0.545   |
| <i>UHRF1</i>  | rs7249758  | -0.489                       | 0.612 | 0.425   | -0.371                       | 0.485 | 0.444   | -0.721           | 0.426 | 0.091   |
| <i>INSR</i>   | rs75253922 | 1.034                        | 0.628 | 0.100   | 0.774                        | 0.498 | 0.120   | 0.450            | 0.439 | 0.306   |
| <i>MAP2K7</i> | rs4804833  | 0.207                        | 0.494 | 0.675   | 0.378                        | 0.393 | 0.337   | 0.108            | 0.345 | 0.755   |

| Locus              | Variant     | Body Fat Percentage - V1 (%) |       |         | Body Fat Percentage - V2 (%) |       |         | BMI - V1 (kg/m2) |       |         |
|--------------------|-------------|------------------------------|-------|---------|------------------------------|-------|---------|------------------|-------|---------|
|                    |             | beta                         | SE    | p-value | beta                         | SE    | p-value | beta             | SE    | p-value |
| <i>FARSA</i>       | rs3111316   | -0.378                       | 0.501 | 0.450   | -0.511                       | 0.397 | 0.199   | -0.209           | 0.349 | 0.550   |
| <i>TM6SF2</i>      | rs8107974   | 0.465                        | 0.972 | 0.632   | 0.061                        | 0.763 | 0.936   | 0.234            | 0.677 | 0.729   |
| <i>PEPD</i>        | rs10406327  | 0.321                        | 0.483 | 0.507   | 0.135                        | 0.384 | 0.725   | 0.195            | 0.336 | 0.563   |
| <i>TOMM40/APOE</i> | rs429358    | 0.271                        | 0.763 | 0.723   | 0.787                        | 0.602 | 0.191   | -0.120           | 0.530 | 0.822   |
| <i>GIPR</i>        | rs10406431  | 0.454                        | 0.495 | 0.360   | 0.422                        | 0.391 | 0.282   | 0.315            | 0.345 | 0.362   |
| <i>ZC3H4</i>       | rs3810291   | 0.111                        | 0.533 | 0.835   | 0.115                        | 0.422 | 0.785   | 0.036            | 0.372 | 0.924   |
| <i>NKX2.2</i>      | rs13041756  | 0.683                        | 0.837 | 0.415   | -0.089                       | 0.663 | 0.893   | 0.065            | 0.582 | 0.911   |
| <i>RALY</i>        | rs2268078   | 0.498                        | 0.525 | 0.343   | 0.426                        | 0.415 | 0.305   | 0.345            | 0.366 | 0.346   |
| <i>EYA2</i>        | rs6063048   | 0.083                        | 0.578 | 0.885   | -0.025                       | 0.458 | 0.957   | 0.009            | 0.404 | 0.983   |
| <i>CEBPB</i>       | rs11699802  | 0.156                        | 0.522 | 0.764   | 0.202                        | 0.412 | 0.624   | 0.171            | 0.363 | 0.637   |
| <i>TSHZ2</i>       | rs34454109  | 0.790                        | 0.593 | 0.184   | 0.625                        | 0.470 | 0.185   | 0.235            | 0.415 | 0.571   |
| <i>GNAS</i>        | rs6070625   | -0.175                       | 0.486 | 0.719   | -0.220                       | 0.385 | 0.568   | -0.197           | 0.339 | 0.561   |
| <i>TCEA2</i>       | rs59944054  | -0.671                       | 0.585 | 0.252   | -0.316                       | 0.463 | 0.495   | -0.691           | 0.408 | 0.091   |
| <i>MTMR3/ASCC2</i> | rs6518681   | -0.409                       | 0.948 | 0.666   | -0.606                       | 0.754 | 0.422   | -0.093           | 0.663 | 0.888   |
| <i>YWHAH</i>       | rs117001013 | -2.797                       | 1.063 | 0.009   | -2.383                       | 0.832 | 0.004   | -1.676           | 0.735 | 0.023   |
| <i>EP300</i>       | rs5758223   | -0.157                       | 0.558 | 0.778   | -0.157                       | 0.442 | 0.722   | 0.015            | 0.390 | 0.968   |
| <i>PNPLA3</i>      | rs738408    | -0.557                       | 0.552 | 0.313   | -0.546                       | 0.436 | 0.212   | -0.441           | 0.385 | 0.253   |
| <i>PIM3</i>        | rs1801645   | 0.513                        | 0.642 | 0.425   | 0.365                        | 0.510 | 0.474   | 0.177            | 0.449 | 0.694   |

| Locus               | Variant     | BMI - V2 (kg/m2) |       |         | Fasting C-Peptide (pg/ml) |         |         | Fasting Glucose (mmol/l) |       |         |
|---------------------|-------------|------------------|-------|---------|---------------------------|---------|---------|--------------------------|-------|---------|
|                     |             | beta             | SE    | p-value | beta                      | SE      | p-value | beta                     | SE    | p-value |
| <i>MACF1</i>        | rs3768321   | -0.595           | 0.395 | 0.132   | 2.534                     | 39.847  | 0.949   | 0.023                    | 0.028 | 0.408   |
| <i>FAF1</i>         | rs58432198  | 0.422            | 0.507 | 0.405   | 33.331                    | 51.238  | 0.516   | -0.001                   | 0.035 | 0.977   |
| <i>PATJ</i>         | rs12140153  | 0.240            | 0.579 | 0.679   | 60.635                    | 57.888  | 0.295   | 0.045                    | 0.040 | 0.267   |
| <i>PTGFRN</i>       | rs1127215   | -0.158           | 0.319 | 0.620   | -36.111                   | 32.447  | 0.266   | -0.020                   | 0.022 | 0.373   |
| <i>NOTCH2</i>       | rs1493694   | 0.284            | 0.554 | 0.608   | 2.198                     | 55.877  | 0.969   | 0.008                    | 0.039 | 0.829   |
| <i>SEC16B</i>       | rs539515    | 0.554            | 0.420 | 0.188   | -40.534                   | 42.647  | 0.342   | -0.040                   | 0.029 | 0.174   |
| <i>DSTYK</i>        | rs12048743  | -0.064           | 0.328 | 0.845   | 15.516                    | 33.362  | 0.642   | 0.023                    | 0.023 | 0.308   |
| <i>SRGAP2</i>       | rs9430095   | 0.089            | 0.317 | 0.780   | 16.147                    | 32.218  | 0.616   | 0.010                    | 0.022 | 0.650   |
| <i>PROX1</i>        | rs340874    | -0.726           | 0.321 | 0.024   | -44.907                   | 32.789  | 0.171   | -0.003                   | 0.023 | 0.910   |
| <i>LYPLAL1</i>      | rs2820446   | 0.319            | 0.362 | 0.379   | 66.697                    | 36.624  | 0.069   | 0.010                    | 0.025 | 0.685   |
| <i>ABCB10</i>       | rs348330    | 0.402            | 0.334 | 0.229   | -66.720                   | 34.093  | 0.051   | 0.007                    | 0.023 | 0.770   |
| <i>GNG4</i>         | rs291367    | -0.251           | 0.338 | 0.458   | -6.444                    | 34.175  | 0.851   | 0.004                    | 0.024 | 0.867   |
| <i>FAM49A</i>       | rs11680058  | -0.285           | 0.474 | 0.548   | 39.901                    | 48.216  | 0.408   | -0.019                   | 0.033 | 0.568   |
| <i>DTNB</i>         | rs17802463  | -0.006           | 0.357 | 0.986   | 35.141                    | 36.175  | 0.332   | -0.043                   | 0.025 | 0.087   |
| <i>GCKR</i>         | rs1260326   | 0.480            | 0.317 | 0.131   | 28.336                    | 32.020  | 0.377   | 0.040                    | 0.022 | 0.073   |
| <i>THADA</i>        | rs80147536  | -0.493           | 0.506 | 0.331   | -9.473                    | 51.904  | 0.855   | -0.005                   | 0.035 | 0.890   |
| <i>BNIP1</i>        | rs6545714   | 0.387            | 0.330 | 0.242   | 90.880                    | 33.400  | 0.007   | 0.024                    | 0.023 | 0.304   |
| <i>BCL11A</i>       | rs243024    | -0.264           | 0.321 | 0.412   | -39.320                   | 32.524  | 0.227   | -0.033                   | 0.022 | 0.147   |
| <i>CEP68</i>        | rs2249105   | 0.396            | 0.333 | 0.234   | -2.390                    | 33.922  | 0.944   | -0.022                   | 0.023 | 0.342   |
| <i>GLI2</i>         | rs11688682  | 0.505            | 0.393 | 0.199   | 100.946                   | 39.893  | 0.012   | 0.025                    | 0.027 | 0.360   |
| <i>PABPC1P2</i>     | rs35999103  | 0.487            | 0.412 | 0.238   | 21.151                    | 41.920  | 0.614   | -0.017                   | 0.029 | 0.550   |
| <i>CYTIP</i>        | rs13426680  | 0.018            | 0.648 | 0.978   | 80.507                    | 65.098  | 0.217   | 0.008                    | 0.045 | 0.855   |
| <i>RBMS1</i>        | rs3772071   | -0.296           | 0.352 | 0.401   | 21.365                    | 35.565  | 0.548   | -0.021                   | 0.025 | 0.402   |
| <i>GRB14/COBLL1</i> | rs10195252  | -0.019           | 0.344 | 0.956   | -15.035                   | 34.863  | 0.666   | -0.015                   | 0.024 | 0.534   |
| <i>G6PC2</i>        | rs1402837   | -0.010           | 0.369 | 0.979   | -4.346                    | 37.192  | 0.907   | 0.065                    | 0.026 | 0.011   |
| <i>CRYBA2</i>       | rs113414093 | 1.089            | 1.283 | 0.396   | 172.943                   | 126.675 | 0.173   | 0.106                    | 0.089 | 0.235   |
| <i>IRS1</i>         | rs2972144   | 0.435            | 0.346 | 0.210   | -25.435                   | 35.125  | 0.469   | 0.007                    | 0.024 | 0.786   |
| <i>PPARG</i>        | rs11709077  | -0.522           | 0.521 | 0.317   | 58.133                    | 52.470  | 0.268   | 0.069                    | 0.036 | 0.058   |

| Locus          | Variant    | BMI - V2 (kg/m2) |       |         | Fasting C-Peptide (pg/ml) |        |         | Fasting Glucose (mmol/l) |       |         |
|----------------|------------|------------------|-------|---------|---------------------------|--------|---------|--------------------------|-------|---------|
|                |            | beta             | SE    | p-value | beta                      | SE     | p-value | beta                     | SE    | p-value |
| <i>UBE2E2</i>  | rs35352848 | -0.049           | 0.389 | 0.899   | -26.976                   | 39.179 | 0.491   | -0.027                   | 0.027 | 0.321   |
| <i>KIF9</i>    | rs11926707 | 0.013            | 0.337 | 0.970   | -41.131                   | 34.019 | 0.227   | 0.003                    | 0.024 | 0.892   |
| <i>RBM6</i>    | rs4688760  | 0.301            | 0.356 | 0.398   | -10.131                   | 36.191 | 0.780   | -0.019                   | 0.025 | 0.437   |
| <i>RFT1</i>    | rs2581787  | 0.268            | 0.323 | 0.407   | 32.759                    | 32.504 | 0.314   | 0.002                    | 0.023 | 0.920   |
| <i>PSMD6</i>   | rs3774723  | -0.192           | 0.445 | 0.667   | -62.649                   | 44.762 | 0.162   | 0.034                    | 0.031 | 0.272   |
| <i>ADAMTS9</i> | rs9860730  | -0.149           | 0.336 | 0.659   | -12.828                   | 34.189 | 0.708   | 0.001                    | 0.024 | 0.983   |
| <i>SHQ1</i>    | rs13085136 | 2.434            | 0.812 | 0.003   | 141.379                   | 82.088 | 0.086   | 0.137                    | 0.057 | 0.017   |
| <i>ROBO2</i>   | rs2272163  | 0.543            | 0.326 | 0.097   | 19.636                    | 33.204 | 0.555   | -0.014                   | 0.023 | 0.553   |
| <i>ADCY5</i>   | rs11708067 | 0.632            | 0.393 | 0.108   | 65.960                    | 39.648 | 0.097   | 0.012                    | 0.028 | 0.664   |
| <i>SLC12A8</i> | rs649961   | -0.448           | 0.321 | 0.163   | -22.659                   | 32.567 | 0.487   | -0.043                   | 0.022 | 0.057   |
| <i>TMCC1</i>   | rs9828772  | 0.564            | 0.583 | 0.333   | 7.557                     | 59.141 | 0.898   | -0.002                   | 0.041 | 0.969   |
| <i>TSC22D2</i> | rs62271373 | -0.211           | 0.573 | 0.712   | 24.864                    | 58.547 | 0.671   | 0.025                    | 0.040 | 0.529   |
| <i>MBNL1</i>   | rs13065698 | 0.128            | 0.333 | 0.702   | 21.052                    | 33.751 | 0.533   | -0.003                   | 0.023 | 0.907   |
| <i>EGFEM1P</i> | rs7629630  | 0.125            | 0.454 | 0.783   | 53.178                    | 46.093 | 0.249   | 0.027                    | 0.032 | 0.397   |
| <i>SLC2A2</i>  | rs9873618  | 0.456            | 0.356 | 0.201   | 4.536                     | 35.973 | 0.900   | 0.060                    | 0.025 | 0.016   |
| <i>ABCC5</i>   | rs2872246  | 0.328            | 0.310 | 0.291   | -51.280                   | 31.346 | 0.102   | 0.014                    | 0.022 | 0.517   |
| <i>IGF2BP2</i> | rs6780171  | -0.120           | 0.349 | 0.732   | -49.228                   | 35.481 | 0.166   | 0.021                    | 0.024 | 0.401   |
| <i>ST6GAL1</i> | rs3887925  | -0.759           | 0.320 | 0.018   | -69.124                   | 32.440 | 0.034   | -0.036                   | 0.022 | 0.112   |
| <i>LPP</i>     | rs4686471  | 0.307            | 0.334 | 0.358   | 31.861                    | 33.847 | 0.347   | -0.022                   | 0.023 | 0.352   |
| <i>MAEA</i>    | rs56337234 | -0.218           | 0.354 | 0.538   | 22.020                    | 36.083 | 0.542   | 0.013                    | 0.025 | 0.612   |
| <i>HTT</i>     | rs362307   | 0.558            | 0.639 | 0.383   | -71.766                   | 64.613 | 0.267   | -0.030                   | 0.045 | 0.506   |
| <i>WFS1</i>    | rs10937721 | 0.196            | 0.322 | 0.542   | -44.829                   | 32.808 | 0.172   | -0.002                   | 0.023 | 0.926   |
| <i>LCORL</i>   | rs12640250 | -0.186           | 0.374 | 0.619   | -39.972                   | 37.823 | 0.291   | 0.028                    | 0.026 | 0.286   |
| <i>GNPDA2</i>  | rs10938398 | 0.417            | 0.321 | 0.194   | 46.638                    | 32.743 | 0.155   | -0.015                   | 0.022 | 0.509   |
| <i>USP46</i>   | rs2102278  | -0.219           | 0.354 | 0.538   | -19.052                   | 35.970 | 0.597   | -0.002                   | 0.025 | 0.936   |
| <i>SCD5</i>    | rs12642790 | -0.341           | 0.342 | 0.318   | -56.558                   | 34.710 | 0.104   | -0.025                   | 0.024 | 0.294   |
| <i>FAM13A</i>  | rs1903002  | -0.180           | 0.328 | 0.583   | 57.444                    | 33.097 | 0.083   | 0.020                    | 0.023 | 0.377   |
| <i>SMARCA1</i> | rs6821438  | 0.358            | 0.330 | 0.278   | -24.775                   | 33.456 | 0.459   | 0.025                    | 0.023 | 0.271   |
| <i>SLC9B1</i>  | rs1580278  | -0.066           | 0.330 | 0.842   | 3.618                     | 33.287 | 0.913   | 0.019                    | 0.023 | 0.423   |
| <i>PABPC4L</i> | rs1296328  | 0.165            | 0.337 | 0.626   | -39.910                   | 34.173 | 0.243   | 0.003                    | 0.024 | 0.890   |

| Locus          | Variant    | BMI - V2 (kg/m2) |       |         | Fasting C-Peptide (pg/ml) |        |         | Fasting Glucose (mmol/l) |       |         |
|----------------|------------|------------------|-------|---------|---------------------------|--------|---------|--------------------------|-------|---------|
|                |            | beta             | SE    | p-value | beta                      | SE     | p-value | beta                     | SE    | p-value |
| <i>TMEM154</i> | rs7669833  | 0.253            | 0.346 | 0.464   | -5.354                    | 35.348 | 0.880   | -0.020                   | 0.024 | 0.416   |
| <i>PDGFC</i>   | rs28819812 | -0.621           | 0.344 | 0.072   | -29.090                   | 34.817 | 0.404   | -0.029                   | 0.024 | 0.231   |
| <i>ACSL1</i>   | rs58730668 | -0.300           | 0.476 | 0.529   | -31.407                   | 47.860 | 0.512   | -0.062                   | 0.033 | 0.064   |
| <i>MRPS30</i>  | rs6884702  | 0.558            | 0.327 | 0.088   | 12.458                    | 33.161 | 0.707   | 0.042                    | 0.023 | 0.066   |
| <i>ITGA1</i>   | rs3811978  | 0.384            | 0.433 | 0.376   | 138.027                   | 43.747 | 0.002   | 0.027                    | 0.031 | 0.370   |
| <i>ARL15</i>   | rs702634   | 0.168            | 0.352 | 0.633   | -42.561                   | 35.627 | 0.233   | -0.018                   | 0.025 | 0.467   |
| <i>ANKRD55</i> | rs465002   | 0.192            | 0.353 | 0.588   | 77.510                    | 35.758 | 0.031   | 0.037                    | 0.025 | 0.133   |
| <i>PIK3R1</i>  | rs4976033  | 0.838            | 0.315 | 0.008   | 42.079                    | 31.942 | 0.188   | 0.026                    | 0.022 | 0.232   |
| <i>POC5</i>    | rs2307111  | 0.341            | 0.317 | 0.283   | 21.862                    | 32.006 | 0.495   | 0.006                    | 0.022 | 0.786   |
| <i>ZBED3</i>   | rs4457053  | -0.368           | 0.349 | 0.292   | -23.352                   | 35.318 | 0.509   | 0.001                    | 0.025 | 0.965   |
| <i>DMGDH</i>   | rs1316776  | -0.159           | 0.342 | 0.643   | -23.008                   | 34.611 | 0.506   | -0.010                   | 0.024 | 0.666   |
| <i>RASA1</i>   | rs7719891  | -0.095           | 0.344 | 0.782   | -37.212                   | 34.774 | 0.285   | 0.029                    | 0.024 | 0.233   |
| <i>PCSK1</i>   | rs13179048 | -0.012           | 0.343 | 0.973   | 19.963                    | 34.715 | 0.565   | 0.082                    | 0.024 | 0.001   |
| <i>PHF15</i>   | rs329122   | 0.260            | 0.337 | 0.441   | 63.824                    | 33.927 | 0.060   | 0.024                    | 0.024 | 0.314   |
| <i>EBF1</i>    | rs3934712  | 0.140            | 0.388 | 0.718   | 54.838                    | 39.254 | 0.163   | 0.008                    | 0.027 | 0.777   |
| <i>RREB1</i>   | rs9379084  | -0.294           | 0.531 | 0.580   | 2.928                     | 53.012 | 0.956   | -0.002                   | 0.037 | 0.963   |
| <i>CDKAL1</i>  | rs7756992  | -0.309           | 0.359 | 0.390   | 3.416                     | 36.399 | 0.925   | 0.015                    | 0.025 | 0.543   |
| <i>MHC</i>     | rs601945   | 0.239            | 0.477 | 0.617   | 90.716                    | 48.485 | 0.062   | 0.007                    | 0.033 | 0.828   |
| <i>LRFN2</i>   | rs34298980 | -0.457           | 0.341 | 0.181   | -23.932                   | 34.826 | 0.492   | -0.005                   | 0.024 | 0.850   |
| <i>VEGFA</i>   | rs6458354  | -0.394           | 0.362 | 0.277   | 12.892                    | 36.718 | 0.726   | 0.026                    | 0.025 | 0.300   |
| <i>TFAP2B</i>  | rs3798519  | 0.503            | 0.414 | 0.225   | 7.186                     | 42.408 | 0.866   | 0.020                    | 0.029 | 0.493   |
| <i>BEND3</i>   | rs4946812  | 0.337            | 0.365 | 0.357   | -37.227                   | 36.791 | 0.312   | 0.004                    | 0.025 | 0.886   |
| <i>CENPW</i>   | rs11759026 | 0.285            | 0.394 | 0.470   | -25.736                   | 39.963 | 0.520   | -0.013                   | 0.028 | 0.628   |
| <i>SOGA3</i>   | rs2800733  | 0.185            | 0.363 | 0.611   | 15.283                    | 36.639 | 0.677   | -0.010                   | 0.025 | 0.707   |
| <i>SLC35D3</i> | rs9494624  | -0.448           | 0.366 | 0.222   | -13.594                   | 36.976 | 0.713   | -0.042                   | 0.026 | 0.099   |
| <i>MIR3668</i> | rs2982521  | 0.279            | 0.335 | 0.405   | -17.289                   | 33.967 | 0.611   | -0.025                   | 0.023 | 0.284   |
| <i>SLC22A3</i> | rs474513   | -0.087           | 0.325 | 0.790   | 18.076                    | 32.759 | 0.581   | -0.013                   | 0.023 | 0.568   |
| <i>QKI</i>     | rs4709746  | 0.247            | 0.470 | 0.599   | 47.026                    | 47.520 | 0.323   | 0.009                    | 0.033 | 0.785   |
| <i>DGKB</i>    | rs10228066 | 0.426            | 0.323 | 0.188   | -25.566                   | 32.819 | 0.436   | 0.027                    | 0.023 | 0.229   |
| <i>IGF2BP3</i> | rs4279506  | -0.103           | 0.324 | 0.751   | -15.832                   | 32.843 | 0.630   | -0.011                   | 0.023 | 0.622   |

| Locus    | Variant    | BMI - V2 (kg/m2) |       |         | Fasting C-Peptide (pg/ml) |        |         | Fasting Glucose (mmol/l) |       |         |
|----------|------------|------------------|-------|---------|---------------------------|--------|---------|--------------------------|-------|---------|
|          |            | beta             | SE    | p-value | beta                      | SE     | p-value | beta                     | SE    | p-value |
| JAZF1    | rs1708302  | -0.169           | 0.317 | 0.595   | -39.076                   | 31.997 | 0.223   | -0.045                   | 0.022 | 0.042   |
| CRHR2    | rs917195   | 0.756            | 0.376 | 0.045   | 40.010                    | 38.033 | 0.293   | 0.025                    | 0.026 | 0.346   |
| GCK      | rs878521   | -0.166           | 0.368 | 0.652   | 7.419                     | 37.326 | 0.843   | 0.031                    | 0.026 | 0.233   |
| FBXL13   | rs11496066 | 0.180            | 0.425 | 0.672   | -63.174                   | 42.764 | 0.140   | 0.041                    | 0.030 | 0.166   |
| RELN     | rs39328    | 0.027            | 0.331 | 0.935   | -53.153                   | 33.461 | 0.113   | 0.001                    | 0.023 | 0.982   |
| CTTNBP2  | rs6976111  | -0.315           | 0.354 | 0.375   | -39.337                   | 35.748 | 0.272   | 0.008                    | 0.025 | 0.746   |
| KLF14    | rs1562396  | 0.047            | 0.354 | 0.896   | 10.186                    | 35.968 | 0.777   | -0.017                   | 0.025 | 0.481   |
| AOC1     | rs62492368 | -0.214           | 0.347 | 0.537   | -30.132                   | 35.024 | 0.390   | -0.024                   | 0.024 | 0.328   |
| MNX1     | rs6459733  | 0.187            | 0.324 | 0.563   | 42.460                    | 32.633 | 0.194   | 0.010                    | 0.023 | 0.665   |
| PPP1R3B  | rs4841132  | -0.810           | 0.620 | 0.192   | 65.635                    | 62.365 | 0.293   | 0.024                    | 0.043 | 0.575   |
| MSRA     | rs17689007 | -0.186           | 0.310 | 0.549   | -4.139                    | 31.366 | 0.895   | -0.031                   | 0.022 | 0.159   |
| XKR6     | rs57327348 | -0.156           | 0.439 | 0.723   | -29.134                   | 44.790 | 0.516   | 0.023                    | 0.031 | 0.449   |
| LPL      | rs10096633 | -0.083           | 0.476 | 0.861   | -18.619                   | 47.778 | 0.697   | -0.013                   | 0.033 | 0.688   |
| PURG     | rs10954772 | 0.485            | 0.343 | 0.158   | -3.306                    | 34.880 | 0.925   | 0.017                    | 0.024 | 0.473   |
| ANK1     | rs13262861 | 0.304            | 0.399 | 0.446   | -3.678                    | 40.086 | 0.927   | 0.014                    | 0.028 | 0.610   |
| TP53INP1 | rs10097617 | 0.258            | 0.325 | 0.427   | -4.549                    | 32.833 | 0.890   | 0.029                    | 0.023 | 0.208   |
| TRHR     | rs12680028 | 0.357            | 0.324 | 0.272   | 37.705                    | 32.401 | 0.245   | 0.022                    | 0.023 | 0.332   |
| SLC30A8  | rs3802177  | -0.332           | 0.353 | 0.347   | -11.041                   | 36.033 | 0.759   | -0.027                   | 0.025 | 0.281   |
| CASC11   | rs17772814 | -0.358           | 0.603 | 0.554   | -7.769                    | 61.250 | 0.899   | -0.054                   | 0.042 | 0.203   |
| PVT1     | rs1561927  | -0.129           | 0.354 | 0.716   | -21.669                   | 35.622 | 0.543   | -0.020                   | 0.025 | 0.430   |
| BOP1     | rs4977213  | -0.197           | 0.323 | 0.542   | -71.338                   | 32.373 | 0.028   | -0.032                   | 0.023 | 0.155   |
| GLIS3    | rs10974438 | 0.164            | 0.335 | 0.624   | -28.417                   | 34.067 | 0.405   | 0.023                    | 0.024 | 0.325   |
| HAUS6    | rs7022807  | 0.071            | 0.329 | 0.829   | 43.934                    | 33.172 | 0.186   | 0.058                    | 0.023 | 0.012   |
| FOCAD    | rs7867635  | 0.214            | 0.329 | 0.516   | -8.995                    | 33.348 | 0.787   | -0.019                   | 0.023 | 0.420   |
| CDKN2A/B | rs10811660 | -0.136           | 0.434 | 0.755   | -32.161                   | 44.654 | 0.472   | 0.023                    | 0.030 | 0.440   |
| LINGO2   | rs1412234  | 0.015            | 0.346 | 0.966   | 7.797                     | 35.143 | 0.825   | 0.011                    | 0.024 | 0.640   |
| UBAP2    | rs12001437 | 0.271            | 0.322 | 0.400   | 11.794                    | 32.667 | 0.718   | 0.016                    | 0.023 | 0.468   |
| MTND2P8  | rs11137820 | 0.077            | 0.320 | 0.810   | -38.388                   | 32.295 | 0.235   | -0.046                   | 0.022 | 0.041   |
| TLE4     | rs17791513 | 0.606            | 0.693 | 0.383   | 109.803                   | 70.151 | 0.118   | -0.051                   | 0.048 | 0.292   |
| TLE1     | rs2796441  | -0.231           | 0.313 | 0.461   | -7.532                    | 31.808 | 0.813   | 0.009                    | 0.022 | 0.697   |

| Locus                | Variant    | BMI - V2 (kg/m2) |       |         | Fasting C-Peptide (pg/ml) |        |         | Fasting Glucose (mmol/l) |       |         |
|----------------------|------------|------------------|-------|---------|---------------------------|--------|---------|--------------------------|-------|---------|
|                      |            | beta             | SE    | p-value | beta                      | SE     | p-value | beta                     | SE    | p-value |
| <i>ZNF169</i>        | rs55653563 | 0.309            | 0.358 | 0.389   | 45.880                    | 36.345 | 0.207   | 0.023                    | 0.025 | 0.358   |
| <i>ABO</i>           | rs505922   | -0.178           | 0.332 | 0.592   | -82.214                   | 33.332 | 0.014   | -0.003                   | 0.023 | 0.906   |
| <i>GPSM1</i>         | rs28505901 | -0.230           | 0.410 | 0.575   | 32.553                    | 41.334 | 0.431   | 0.007                    | 0.029 | 0.796   |
| <i>CDC123/CAMK1D</i> | rs11257655 | 0.700            | 0.402 | 0.082   | -47.025                   | 40.871 | 0.250   | 0.011                    | 0.028 | 0.693   |
| <i>HKDC1</i>         | rs4746822  | 0.562            | 0.331 | 0.090   | -13.077                   | 33.767 | 0.699   | -0.029                   | 0.023 | 0.213   |
| <i>NEUROG3</i>       | rs2642588  | 0.200            | 0.350 | 0.569   | 50.971                    | 35.306 | 0.149   | -0.010                   | 0.024 | 0.689   |
| <i>ZMIZ1</i>         | rs703972   | 0.108            | 0.335 | 0.748   | 50.996                    | 33.946 | 0.134   | -0.003                   | 0.023 | 0.893   |
| <i>PTEN</i>          | rs11202627 | -0.076           | 0.450 | 0.866   | 54.397                    | 45.395 | 0.231   | 0.062                    | 0.031 | 0.048   |
| <i>HHEX/IDE</i>      | rs10882101 | 0.166            | 0.324 | 0.609   | 16.013                    | 32.772 | 0.625   | 0.001                    | 0.023 | 0.978   |
| <i>TCF7L2</i>        | rs7903146  | -0.090           | 0.336 | 0.788   | 44.736                    | 33.965 | 0.188   | 0.044                    | 0.023 | 0.060   |
| <i>WDR11</i>         | rs72631105 | 0.208            | 0.428 | 0.627   | -39.896                   | 43.263 | 0.357   | -0.018                   | 0.030 | 0.551   |
| <i>PLEKHA1</i>       | rs2280141  | 0.282            | 0.324 | 0.385   | -12.887                   | 32.891 | 0.695   | 0.016                    | 0.023 | 0.474   |
| <i>INS/IGF2</i>      | rs4929965  | 0.442            | 0.328 | 0.179   | 5.627                     | 33.332 | 0.866   | -0.020                   | 0.023 | 0.395   |
| <i>KCNQ1</i>         | rs2237895  | -0.197           | 0.311 | 0.527   | -8.222                    | 31.430 | 0.794   | -0.022                   | 0.022 | 0.310   |
| <i>KCNJ11</i>        | rs5213     | -0.046           | 0.351 | 0.895   | -14.112                   | 35.485 | 0.691   | -0.026                   | 0.024 | 0.285   |
| <i>METTL15</i>       | rs4923543  | -0.530           | 0.351 | 0.132   | -35.831                   | 35.829 | 0.318   | 0.001                    | 0.025 | 0.973   |
| <i>PDHX</i>          | rs2767036  | -0.201           | 0.350 | 0.566   | -58.518                   | 35.404 | 0.099   | -0.003                   | 0.025 | 0.888   |
| <i>HSD17B12</i>      | rs1061810  | 0.001            | 0.360 | 0.999   | -64.550                   | 36.280 | 0.076   | 0.007                    | 0.025 | 0.780   |
| <i>CRY2</i>          | rs7115753  | 0.092            | 0.328 | 0.780   | -20.410                   | 33.252 | 0.540   | 0.001                    | 0.023 | 0.965   |
| <i>CELF1</i>         | rs7124681  | -0.103           | 0.313 | 0.743   | -27.906                   | 31.696 | 0.379   | 0.003                    | 0.022 | 0.877   |
| <i>MAP3K11</i>       | rs1783541  | 0.238            | 0.428 | 0.579   | -80.124                   | 43.469 | 0.066   | 0.017                    | 0.030 | 0.559   |
| <i>CENTD2/ARAP1</i>  | rs77464186 | 0.366            | 0.459 | 0.425   | 96.863                    | 45.960 | 0.036   | -0.017                   | 0.032 | 0.603   |
| <i>MTNR1B</i>        | rs10830963 | 0.562            | 0.358 | 0.118   | 3.853                     | 36.495 | 0.916   | 0.109                    | 0.025 | 0.000   |
| <i>ETS1</i>          | rs67232546 | -0.612           | 0.388 | 0.115   | -58.783                   | 38.896 | 0.131   | -0.020                   | 0.027 | 0.467   |
| <i>CDKN1B</i>        | rs2066827  | -0.612           | 0.499 | 0.221   | -83.187                   | 50.313 | 0.099   | -0.035                   | 0.035 | 0.311   |
| <i>ITPR2</i>         | rs718314   | -0.419           | 0.370 | 0.258   | 52.166                    | 37.442 | 0.164   | -0.012                   | 0.026 | 0.655   |
| <i>KLHDC5</i>        | rs10842994 | -0.010           | 0.393 | 0.981   | -21.118                   | 39.662 | 0.595   | 0.001                    | 0.028 | 0.972   |
| <i>HMGA2</i>         | rs2258238  | -0.349           | 0.509 | 0.493   | -69.998                   | 51.061 | 0.171   | 0.044                    | 0.035 | 0.219   |
| <i>TSPAN8/LGR5</i>   | rs1796330  | 0.098            | 0.328 | 0.766   | 57.315                    | 33.263 | 0.085   | 0.031                    | 0.023 | 0.181   |
| <i>USP44</i>         | rs2197973  | 0.527            | 0.314 | 0.094   | -17.401                   | 31.786 | 0.584   | -0.008                   | 0.022 | 0.714   |

| Locus           | Variant    | BMI - V2 (kg/m2) |       |         | Fasting C-Peptide (pg/ml) |        |         | Fasting Glucose (mmol/l) |       |         |
|-----------------|------------|------------------|-------|---------|---------------------------|--------|---------|--------------------------|-------|---------|
|                 |            | beta             | SE    | p-value | beta                      | SE     | p-value | beta                     | SE    | p-value |
| <i>RMST</i>     | rs77864822 | 0.135            | 0.648 | 0.834   | 15.058                    | 65.906 | 0.819   | 0.035                    | 0.046 | 0.441   |
| <i>WSCD2</i>    | rs1426371  | 0.116            | 0.404 | 0.773   | -46.538                   | 40.767 | 0.254   | 0.002                    | 0.028 | 0.952   |
| <i>KSR2</i>     | rs34965774 | 0.309            | 0.467 | 0.509   | 10.317                    | 47.151 | 0.827   | 0.073                    | 0.032 | 0.024   |
| <i>HNF1A</i>    | rs56348580 | -0.019           | 0.351 | 0.957   | 11.909                    | 35.484 | 0.737   | 0.011                    | 0.025 | 0.660   |
| <i>MPHOSPH9</i> | rs4148856  | 0.567            | 0.365 | 0.121   | 67.385                    | 36.754 | 0.067   | 0.054                    | 0.025 | 0.034   |
| <i>ZNF664</i>   | rs7978610  | -0.152           | 0.330 | 0.646   | -14.725                   | 33.267 | 0.658   | -0.004                   | 0.023 | 0.850   |
| <i>FBRSL1</i>   | rs12811407 | 0.042            | 0.351 | 0.906   | -46.413                   | 35.423 | 0.191   | 0.033                    | 0.024 | 0.183   |
| <i>RNF6</i>     | rs34584161 | -0.524           | 0.364 | 0.151   | 36.968                    | 36.730 | 0.315   | -0.019                   | 0.026 | 0.465   |
| <i>HMGB1</i>    | rs11842871 | -0.323           | 0.395 | 0.415   | 46.972                    | 40.292 | 0.244   | -0.002                   | 0.028 | 0.948   |
| <i>KL</i>       | rs576674   | -0.360           | 0.401 | 0.369   | -0.836                    | 40.412 | 0.984   | -0.009                   | 0.028 | 0.745   |
| <i>DLEU1</i>    | rs963740   | -0.150           | 0.356 | 0.673   | 71.518                    | 35.928 | 0.047   | 0.023                    | 0.025 | 0.361   |
| <i>PCDH17</i>   | rs9537803  | -0.017           | 0.361 | 0.962   | 12.795                    | 36.692 | 0.727   | -0.007                   | 0.025 | 0.773   |
| <i>SRGAP2D</i>  | rs9563615  | 0.357            | 0.364 | 0.327   | 59.488                    | 36.943 | 0.108   | 0.013                    | 0.025 | 0.597   |
| <i>SPRY2</i>    | rs1359790  | 0.128            | 0.356 | 0.719   | 20.704                    | 36.067 | 0.566   | 0.021                    | 0.025 | 0.388   |
| <i>IRS2</i>     | rs7987740  | 0.434            | 0.336 | 0.197   | 29.764                    | 34.053 | 0.382   | 0.006                    | 0.024 | 0.789   |
| <i>SLC7A7</i>   | rs17122772 | -0.467           | 0.412 | 0.257   | -56.309                   | 41.746 | 0.178   | -0.046                   | 0.029 | 0.107   |
| <i>AKAP6</i>    | rs17522122 | 0.157            | 0.320 | 0.624   | -27.378                   | 32.629 | 0.402   | 0.001                    | 0.022 | 0.976   |
| <i>CLEC14A</i>  | rs8017808  | -0.036           | 0.357 | 0.919   | 46.547                    | 36.042 | 0.197   | -0.033                   | 0.025 | 0.190   |
| <i>NRXN3</i>    | rs17836088 | 0.138            | 0.397 | 0.728   | 4.078                     | 40.031 | 0.919   | 0.004                    | 0.028 | 0.888   |
| <i>SMEK1</i>    | rs8010382  | 0.099            | 0.341 | 0.772   | 26.699                    | 34.448 | 0.439   | 0.035                    | 0.024 | 0.147   |
| <i>MARK3</i>    | rs62007683 | -0.251           | 0.331 | 0.448   | 17.083                    | 33.556 | 0.611   | 0.007                    | 0.023 | 0.771   |
| <i>RASGRP1</i>  | rs34715063 | -0.434           | 0.500 | 0.386   | -56.174                   | 50.502 | 0.266   | 0.054                    | 0.035 | 0.122   |
| <i>LTK</i>      | rs11070332 | -0.660           | 0.321 | 0.040   | -66.452                   | 32.414 | 0.041   | -0.007                   | 0.023 | 0.751   |
| <i>ONECUT1</i>  | rs2456530  | 0.086            | 0.500 | 0.864   | 45.708                    | 50.542 | 0.366   | 0.054                    | 0.035 | 0.123   |
| <i>C2CD4A/B</i> | rs8037894  | 0.145            | 0.320 | 0.651   | 33.687                    | 32.371 | 0.299   | 0.020                    | 0.023 | 0.366   |
| <i>USP3</i>     | rs7178762  | -0.320           | 0.323 | 0.322   | 10.412                    | 32.621 | 0.750   | -0.011                   | 0.023 | 0.622   |
| <i>MAP2K5</i>   | rs4776970  | -0.135           | 0.327 | 0.680   | -4.734                    | 33.265 | 0.887   | -0.014                   | 0.023 | 0.552   |
| <i>PTPN9</i>    | rs13737    | 0.270            | 0.364 | 0.458   | -32.125                   | 36.667 | 0.381   | -0.025                   | 0.025 | 0.325   |
| <i>HMG20A</i>   | rs1005752  | 0.064            | 0.351 | 0.855   | 4.420                     | 35.537 | 0.901   | 0.012                    | 0.025 | 0.637   |
| <i>AP3S2</i>    | rs4932265  | -0.252           | 0.369 | 0.496   | -4.865                    | 37.417 | 0.897   | 0.008                    | 0.026 | 0.767   |



| Locus         | Variant    | BMI - V2 (kg/m2) |       |         | Fasting C-Peptide (pg/ml) |        |         | Fasting Glucose (mmol/l) |       |         |
|---------------|------------|------------------|-------|---------|---------------------------|--------|---------|--------------------------|-------|---------|
|               |            | beta             | SE    | p-value | beta                      | SE     | p-value | beta                     | SE    | p-value |
| <i>PRC1</i>   | rs12910825 | 0.203            | 0.327 | 0.536   | -2.085                    | 33.081 | 0.950   | 0.004                    | 0.023 | 0.853   |
| <i>ITFG3</i>  | rs6600191  | -0.030           | 0.416 | 0.942   | 50.464                    | 41.888 | 0.229   | -0.016                   | 0.029 | 0.584   |
| <i>CLUAP1</i> | rs3751837  | 0.330            | 0.407 | 0.417   | -12.966                   | 41.327 | 0.754   | -0.035                   | 0.029 | 0.220   |
| <i>ATP2A1</i> | rs8046545  | 0.542            | 0.342 | 0.114   | -0.897                    | 34.918 | 0.980   | -0.027                   | 0.024 | 0.255   |
| <i>FAM57B</i> | rs11642430 | 0.152            | 0.338 | 0.653   | 3.944                     | 34.049 | 0.908   | 0.061                    | 0.024 | 0.010   |
| <i>FTO</i>    | rs1421085  | 0.505            | 0.315 | 0.109   | 5.707                     | 32.023 | 0.859   | 0.046                    | 0.022 | 0.039   |
| <i>NFAT5</i>  | rs862320   | 0.266            | 0.324 | 0.412   | -30.267                   | 32.776 | 0.356   | -0.023                   | 0.023 | 0.319   |
| <i>BCAR1</i>  | rs72802342 | 0.454            | 0.628 | 0.470   | -118.761                  | 63.384 | 0.061   | -0.035                   | 0.044 | 0.426   |
| <i>CMIP</i>   | rs2925979  | -0.418           | 0.348 | 0.230   | -1.194                    | 35.361 | 0.973   | -0.033                   | 0.024 | 0.177   |
| <i>SPG7</i>   | rs12920022 | 0.009            | 0.468 | 0.984   | 1.652                     | 47.540 | 0.972   | 0.010                    | 0.033 | 0.759   |
| <i>ZZEF1</i>  | rs1377807  | 0.189            | 0.345 | 0.585   | 6.321                     | 35.025 | 0.857   | -0.057                   | 0.024 | 0.017   |
| <i>ATP1B2</i> | rs1641523  | 0.149            | 0.335 | 0.656   | 66.089                    | 33.710 | 0.050   | 0.029                    | 0.023 | 0.210   |
| <i>GLP2R</i>  | rs7222481  | 0.433            | 0.352 | 0.220   | 69.620                    | 35.513 | 0.050   | 0.034                    | 0.025 | 0.162   |
| <i>RAI1</i>   | rs4925109  | -0.530           | 0.321 | 0.099   | -34.558                   | 32.738 | 0.292   | 0.008                    | 0.022 | 0.728   |
| <i>NF1</i>    | rs71372253 | 0.134            | 0.601 | 0.823   | 19.143                    | 62.321 | 0.759   | 0.047                    | 0.042 | 0.261   |
| <i>HNF1B</i>  | rs10908278 | 0.093            | 0.323 | 0.774   | -27.941                   | 32.470 | 0.390   | -0.034                   | 0.023 | 0.134   |
| <i>MLX</i>    | rs34855406 | -0.489           | 0.365 | 0.181   | -29.563                   | 36.853 | 0.423   | 0.000                    | 0.026 | 0.988   |
| <i>TTL6</i>   | rs35895680 | 0.399            | 0.345 | 0.249   | 41.313                    | 35.100 | 0.240   | 0.015                    | 0.024 | 0.542   |
| <i>ACE</i>    | rs60276348 | 0.154            | 0.410 | 0.707   | -36.132                   | 41.299 | 0.382   | 0.016                    | 0.029 | 0.582   |
| <i>BPTF</i>   | rs61676547 | -0.336           | 0.383 | 0.381   | -6.298                    | 38.654 | 0.871   | -0.034                   | 0.027 | 0.199   |
| <i>LAMA1</i>  | rs7240767  | 0.116            | 0.321 | 0.718   | -9.042                    | 32.562 | 0.781   | -0.001                   | 0.023 | 0.955   |
| <i>COMMD9</i> | rs62080313 | 0.283            | 0.475 | 0.552   | 30.839                    | 48.760 | 0.527   | -0.002                   | 0.033 | 0.946   |
| <i>TCF4</i>   | rs72926932 | -0.685           | 0.594 | 0.249   | -8.757                    | 60.499 | 0.885   | 0.007                    | 0.042 | 0.869   |
| <i>WDR7</i>   | rs17684074 | -0.536           | 0.382 | 0.161   | -40.621                   | 38.933 | 0.297   | 0.026                    | 0.027 | 0.339   |
| <i>GRP</i>    | rs9957145  | 0.475            | 0.457 | 0.299   | 1.422                     | 46.157 | 0.975   | 0.040                    | 0.032 | 0.212   |
| <i>MC4R</i>   | rs523288   | 0.916            | 0.370 | 0.014   | 41.494                    | 37.312 | 0.267   | 0.031                    | 0.026 | 0.230   |
| <i>BCL2A</i>  | rs12454712 | -0.324           | 0.385 | 0.401   | -31.276                   | 38.768 | 0.420   | 0.000                    | 0.027 | 0.998   |
| <i>UHRF1</i>  | rs7249758  | -0.638           | 0.399 | 0.110   | -87.206                   | 40.147 | 0.030   | -0.022                   | 0.028 | 0.441   |
| <i>INSR</i>   | rs75253922 | 0.384            | 0.411 | 0.351   | -24.942                   | 41.486 | 0.548   | -0.065                   | 0.029 | 0.024   |
| <i>MAP2K7</i> | rs4804833  | 0.261            | 0.323 | 0.419   | 60.788                    | 32.735 | 0.064   | 0.050                    | 0.023 | 0.029   |

| Locus              | Variant     | BMI - V2 (kg/m2) |       |         | Fasting C-Peptide (pg/ml) |        |         | Fasting Glucose (mmol/l) |       |         |
|--------------------|-------------|------------------|-------|---------|---------------------------|--------|---------|--------------------------|-------|---------|
|                    |             | beta             | SE    | p-value | beta                      | SE     | p-value | beta                     | SE    | p-value |
| <i>FARSA</i>       | rs3111316   | -0.305           | 0.326 | 0.351   | -16.389                   | 33.052 | 0.620   | 0.002                    | 0.023 | 0.933   |
| <i>TM6SF2</i>      | rs8107974   | 0.207            | 0.631 | 0.744   | 77.978                    | 64.062 | 0.224   | 0.026                    | 0.044 | 0.557   |
| <i>PEPD</i>        | rs10406327  | 0.145            | 0.315 | 0.646   | 36.404                    | 31.873 | 0.254   | 0.030                    | 0.022 | 0.173   |
| <i>TOMM40/APOE</i> | rs429358    | 0.127            | 0.497 | 0.799   | 68.076                    | 50.190 | 0.176   | 0.005                    | 0.035 | 0.895   |
| <i>GIPR</i>        | rs10406431  | 0.481            | 0.322 | 0.136   | 43.266                    | 32.690 | 0.186   | 0.013                    | 0.023 | 0.569   |
| <i>ZC3H4</i>       | rs3810291   | 0.090            | 0.348 | 0.796   | 24.635                    | 35.361 | 0.486   | 0.007                    | 0.024 | 0.763   |
| <i>NKX2.2</i>      | rs13041756  | -0.407           | 0.546 | 0.457   | -19.589                   | 55.255 | 0.723   | 0.015                    | 0.038 | 0.687   |
| <i>RALY</i>        | rs2268078   | 0.125            | 0.343 | 0.716   | 58.890                    | 34.676 | 0.090   | 0.026                    | 0.024 | 0.280   |
| <i>EYA2</i>        | rs6063048   | 0.058            | 0.378 | 0.877   | 34.627                    | 38.246 | 0.366   | -0.004                   | 0.026 | 0.892   |
| <i>CEBPB</i>       | rs11699802  | 0.182            | 0.339 | 0.592   | 35.546                    | 34.328 | 0.301   | 0.010                    | 0.024 | 0.668   |
| <i>TSHZ2</i>       | rs34454109  | 0.210            | 0.388 | 0.588   | -5.357                    | 39.598 | 0.892   | 0.001                    | 0.027 | 0.976   |
| <i>GNAS</i>        | rs6070625   | -0.366           | 0.318 | 0.250   | -16.938                   | 32.300 | 0.600   | -0.024                   | 0.022 | 0.271   |
| <i>TCEA2</i>       | rs59944054  | -0.603           | 0.381 | 0.115   | 39.284                    | 38.552 | 0.309   | -0.002                   | 0.027 | 0.926   |
| <i>MTMR3/ASCC2</i> | rs6518681   | -0.118           | 0.621 | 0.850   | 69.826                    | 61.889 | 0.260   | 0.007                    | 0.043 | 0.863   |
| <i>YWHAH</i>       | rs117001013 | -1.663           | 0.685 | 0.016   | -135.262                  | 69.583 | 0.052   | -0.045                   | 0.048 | 0.349   |
| <i>EP300</i>       | rs5758223   | 0.024            | 0.365 | 0.948   | -45.593                   | 36.992 | 0.218   | -0.029                   | 0.025 | 0.253   |
| <i>PNPLA3</i>      | rs738408    | -0.376           | 0.360 | 0.297   | -25.785                   | 36.641 | 0.482   | 0.005                    | 0.025 | 0.849   |
| <i>PIM3</i>        | rs1801645   | 0.172            | 0.419 | 0.682   | 46.267                    | 42.419 | 0.276   | 0.034                    | 0.029 | 0.242   |

| Locus               | Variant     | Fasting Insulin (pg/ml) |        |         | Fasting Proinsulin (adj Fasting Insulin) (pmol/l) |       |         |
|---------------------|-------------|-------------------------|--------|---------|---------------------------------------------------|-------|---------|
|                     |             | beta                    | SE     | p-value | beta                                              | SE    | p-value |
| <i>MACF1</i>        | rs3768321   | 59.049                  | 29.230 | 0.044   | 0.122                                             | 0.676 | 0.857   |
| <i>FAF1</i>         | rs58432198  | 47.771                  | 37.780 | 0.207   | 0.034                                             | 0.869 | 0.969   |
| <i>PATJ</i>         | rs12140153  | 6.472                   | 42.817 | 0.880   | -0.615                                            | 0.982 | 0.531   |
| <i>PTGFRN</i>       | rs1127215   | -53.390                 | 23.703 | 0.025   | -0.253                                            | 0.548 | 0.645   |
| <i>NOTCH2</i>       | rs1493694   | 10.750                  | 41.249 | 0.794   | 3.764                                             | 0.939 | 0.000   |
| <i>SEC16B</i>       | rs539515    | -63.831                 | 31.365 | 0.042   | 0.200                                             | 0.726 | 0.783   |
| <i>DSTYK</i>        | rs12048743  | 53.198                  | 24.488 | 0.030   | -0.132                                            | 0.568 | 0.817   |
| <i>SRGAP2</i>       | rs9430095   | -2.184                  | 23.686 | 0.927   | 0.522                                             | 0.543 | 0.337   |
| <i>PROX1</i>        | rs340874    | 0.932                   | 24.174 | 0.969   | 0.253                                             | 0.557 | 0.649   |
| <i>LYPLAL1</i>      | rs2820446   | 69.568                  | 26.877 | 0.010   | 0.440                                             | 0.624 | 0.481   |
| <i>ABCB10</i>       | rs348330    | -30.135                 | 25.090 | 0.230   | 0.035                                             | 0.577 | 0.952   |
| <i>GNG4</i>         | rs291367    | 23.440                  | 25.116 | 0.351   | -0.148                                            | 0.579 | 0.798   |
| <i>FAM49A</i>       | rs11680058  | 6.019                   | 35.538 | 0.866   | 0.465                                             | 0.816 | 0.569   |
| <i>DTNB</i>         | rs17802463  | 30.099                  | 26.626 | 0.259   | -0.496                                            | 0.612 | 0.419   |
| <i>GCKR</i>         | rs1260326   | 21.014                  | 23.527 | 0.372   | 0.440                                             | 0.541 | 0.417   |
| <i>THADA</i>        | rs80147536  | 8.546                   | 38.218 | 0.823   | -0.037                                            | 0.876 | 0.967   |
| <i>BNIP1</i>        | rs6545714   | 7.659                   | 24.683 | 0.756   | -0.023                                            | 0.568 | 0.968   |
| <i>BCL11A</i>       | rs243024    | -12.423                 | 24.004 | 0.605   | 0.489                                             | 0.552 | 0.376   |
| <i>CEP68</i>        | rs2249105   | -2.740                  | 24.964 | 0.913   | 0.389                                             | 0.573 | 0.497   |
| <i>GLI2</i>         | rs11688682  | 60.213                  | 29.343 | 0.041   | 1.580                                             | 0.675 | 0.020   |
| <i>PABPC1P2</i>     | rs35999103  | 22.238                  | 30.679 | 0.469   | 0.627                                             | 0.704 | 0.374   |
| <i>CYTIP</i>        | rs13426680  | 36.453                  | 48.116 | 0.449   | -0.167                                            | 1.104 | 0.880   |
| <i>RBMS1</i>        | rs3772071   | 14.642                  | 26.227 | 0.577   | 0.748                                             | 0.604 | 0.216   |
| <i>GRB14/COBLL1</i> | rs10195252  | -5.794                  | 25.724 | 0.822   | 0.090                                             | 0.592 | 0.879   |
| <i>G6PC2</i>        | rs1402837   | 0.480                   | 27.279 | 0.986   | 0.166                                             | 0.626 | 0.791   |
| <i>CRYBA2</i>       | rs113414093 | -7.179                  | 93.724 | 0.939   | 0.320                                             | 2.148 | 0.882   |
| <i>IRS1</i>         | rs2972144   | 6.041                   | 25.873 | 0.815   | -0.514                                            | 0.593 | 0.386   |
| <i>PPARG</i>        | rs11709077  | 24.483                  | 38.659 | 0.527   | 0.110                                             | 0.887 | 0.901   |

| Locus          | Variant    | Fasting Insulin (pg/ml) |        |         | Fasting Proinsulin (adj Fasting Insulin) (pmol/l) |       |         |
|----------------|------------|-------------------------|--------|---------|---------------------------------------------------|-------|---------|
|                |            | beta                    | SE     | p-value | beta                                              | SE    | p-value |
| <i>UBE2E2</i>  | rs35352848 | -30.303                 | 28.835 | 0.294   | 0.050                                             | 0.663 | 0.940   |
| <i>KIF9</i>    | rs11926707 | 23.993                  | 22.843 | 0.294   | -0.619                                            | 0.560 | 0.269   |
| <i>RBM6</i>    | rs4688760  | 14.537                  | 26.649 | 0.586   | -0.261                                            | 0.612 | 0.670   |
| <i>RFT1</i>    | rs2581787  | 10.269                  | 24.002 | 0.669   | 0.531                                             | 0.551 | 0.335   |
| <i>PSMD6</i>   | rs3774723  | -37.679                 | 32.960 | 0.253   | 0.004                                             | 0.759 | 0.996   |
| <i>ADAMTS9</i> | rs9860730  | -19.897                 | 25.095 | 0.428   | -0.639                                            | 0.576 | 0.268   |
| <i>SHQ1</i>    | rs13085136 | 147.231                 | 60.461 | 0.015   | 0.714                                             | 1.400 | 0.610   |
| <i>ROBO2</i>   | rs2272163  | 8.842                   | 24.478 | 0.718   | 0.488                                             | 0.563 | 0.386   |
| <i>ADCY5</i>   | rs11708067 | 26.139                  | 29.257 | 0.372   | -0.423                                            | 0.673 | 0.530   |
| <i>SLC12A8</i> | rs649961   | 10.442                  | 23.933 | 0.663   | -0.343                                            | 0.548 | 0.531   |
| <i>TMCC1</i>   | rs9828772  | 28.153                  | 43.482 | 0.518   | 0.163                                             | 1.005 | 0.871   |
| <i>TSC22D2</i> | rs62271373 | 78.171                  | 42.945 | 0.069   | -1.572                                            | 0.992 | 0.114   |
| <i>MBNL1</i>   | rs13065698 | 1.416                   | 24.844 | 0.955   | -0.003                                            | 0.570 | 0.996   |
| <i>EGFEM1P</i> | rs7629630  | 0.047                   | 33.900 | 0.999   | 0.953                                             | 0.776 | 0.220   |
| <i>SLC2A2</i>  | rs9873618  | 21.863                  | 26.459 | 0.409   | 0.845                                             | 0.607 | 0.165   |
| <i>ABCC5</i>   | rs2872246  | -42.848                 | 23.079 | 0.064   | 1.089                                             | 0.532 | 0.041   |
| <i>IGF2BP2</i> | rs6780171  | -24.573                 | 26.177 | 0.348   | 0.500                                             | 0.601 | 0.406   |
| <i>ST6GAL1</i> | rs3887925  | -17.556                 | 24.021 | 0.465   | -0.293                                            | 0.551 | 0.595   |
| <i>LPP</i>     | rs4686471  | 3.131                   | 24.841 | 0.900   | -0.678                                            | 0.571 | 0.236   |
| <i>MAEA</i>    | rs56337234 | 62.902                  | 26.376 | 0.017   | -0.321                                            | 0.613 | 0.600   |
| <i>HTT</i>     | rs362307   | -7.154                  | 47.525 | 0.880   | -0.887                                            | 1.089 | 0.416   |
| <i>WFS1</i>    | rs10937721 | -21.914                 | 24.208 | 0.366   | -0.109                                            | 0.558 | 0.845   |
| <i>LCORL</i>   | rs12640250 | -22.766                 | 27.861 | 0.414   | -0.991                                            | 0.639 | 0.121   |
| <i>GNPDA2</i>  | rs10938398 | 37.025                  | 23.950 | 0.123   | 0.030                                             | 0.552 | 0.956   |
| <i>USP46</i>   | rs2102278  | -6.265                  | 26.319 | 0.812   | -0.802                                            | 0.603 | 0.184   |
| <i>SCD5</i>    | rs12642790 | -5.193                  | 25.496 | 0.839   | -0.391                                            | 0.585 | 0.504   |
| <i>FAM13A</i>  | rs1903002  | -14.531                 | 24.380 | 0.551   | 0.154                                             | 0.560 | 0.783   |
| <i>SMARCA1</i> | rs6821438  | -4.616                  | 24.598 | 0.851   | 0.438                                             | 0.564 | 0.438   |
| <i>SLC9B1</i>  | rs1580278  | 8.937                   | 24.595 | 0.716   | -0.282                                            | 0.566 | 0.618   |
| <i>PABPC4L</i> | rs1296328  | -78.103                 | 24.885 | 0.002   | 0.703                                             | 0.582 | 0.227   |

| Locus          | Variant    | Fasting Insulin (pg/ml) |        |         | Fasting Proinsulin (adj Fasting Insulin) (pmol/l) |       |         |
|----------------|------------|-------------------------|--------|---------|---------------------------------------------------|-------|---------|
|                |            | beta                    | SE     | p-value | beta                                              | SE    | p-value |
| <i>TMEM154</i> | rs7669833  | -21.471                 | 25.868 | 0.407   | 0.221                                             | 0.594 | 0.711   |
| <i>PDGFC</i>   | rs28819812 | -16.004                 | 25.583 | 0.532   | -0.054                                            | 0.587 | 0.927   |
| <i>ACSL1</i>   | rs58730668 | 5.076                   | 35.338 | 0.886   | -0.410                                            | 0.812 | 0.614   |
| <i>MRPS30</i>  | rs6884702  | -12.419                 | 24.376 | 0.611   | 0.449                                             | 0.559 | 0.423   |
| <i>ITGA1</i>   | rs3811978  | 125.565                 | 31.800 | 0.000   | -1.381                                            | 0.747 | 0.065   |
| <i>ARL15</i>   | rs702634   | -26.547                 | 26.171 | 0.311   | 0.241                                             | 0.604 | 0.690   |
| <i>ANKRD55</i> | rs465002   | 34.150                  | 26.421 | 0.197   | 0.384                                             | 0.608 | 0.528   |
| <i>PIK3R1</i>  | rs4976033  | 1.518                   | 23.608 | 0.949   | -0.252                                            | 0.543 | 0.643   |
| <i>POC5</i>    | rs2307111  | 6.648                   | 23.627 | 0.779   | 0.797                                             | 0.542 | 0.142   |
| <i>ZBED3</i>   | rs4457053  | -17.513                 | 26.032 | 0.501   | -1.174                                            | 0.598 | 0.050   |
| <i>DMGDH</i>   | rs1316776  | -3.637                  | 25.523 | 0.887   | -0.466                                            | 0.587 | 0.428   |
| <i>RASA1</i>   | rs7719891  | -15.549                 | 25.643 | 0.545   | -0.296                                            | 0.589 | 0.615   |
| <i>PCSK1</i>   | rs13179048 | 12.120                  | 25.500 | 0.635   | -1.629                                            | 0.581 | 0.005   |
| <i>PHF15</i>   | rs329122   | 41.047                  | 25.049 | 0.102   | 0.398                                             | 0.578 | 0.491   |
| <i>EBF1</i>    | rs3934712  | 32.567                  | 28.933 | 0.261   | 0.637                                             | 0.665 | 0.339   |
| <i>RREB1</i>   | rs9379084  | 6.295                   | 39.107 | 0.872   | 0.298                                             | 0.899 | 0.740   |
| <i>CDKAL1</i>  | rs7756992  | 6.746                   | 26.710 | 0.801   | 0.081                                             | 0.613 | 0.896   |
| <i>MHC</i>     | rs601945   | -17.763                 | 35.887 | 0.621   | -0.119                                            | 0.825 | 0.886   |
| <i>LRFN2</i>   | rs34298980 | -6.126                  | 25.581 | 0.811   | -0.503                                            | 0.588 | 0.393   |
| <i>VEGFA</i>   | rs6458354  | 12.109                  | 27.057 | 0.655   | -0.262                                            | 0.621 | 0.673   |
| <i>TFAP2B</i>  | rs3798519  | 16.077                  | 31.217 | 0.607   | 1.791                                             | 0.714 | 0.012   |
| <i>BEND3</i>   | rs4946812  | -34.150                 | 26.998 | 0.206   | 0.598                                             | 0.624 | 0.338   |
| <i>CENPW</i>   | rs11759026 | 18.715                  | 29.274 | 0.523   | 0.282                                             | 0.672 | 0.675   |
| <i>SOGA3</i>   | rs2800733  | 50.891                  | 26.910 | 0.059   | 0.651                                             | 0.621 | 0.295   |
| <i>SLC35D3</i> | rs9494624  | -20.049                 | 27.236 | 0.462   | -0.067                                            | 0.626 | 0.914   |
| <i>MIR3668</i> | rs2982521  | 1.194                   | 24.991 | 0.962   | -0.337                                            | 0.573 | 0.557   |
| <i>SLC22A3</i> | rs474513   | 24.489                  | 24.140 | 0.311   | 0.218                                             | 0.556 | 0.695   |
| <i>QKI</i>     | rs4709746  | 0.036                   | 34.985 | 0.999   | 0.361                                             | 0.805 | 0.654   |
| <i>DGKB</i>    | rs10228066 | 2.770                   | 24.162 | 0.909   | -0.813                                            | 0.553 | 0.142   |
| <i>IGF2BP3</i> | rs4279506  | 6.572                   | 24.151 | 0.786   | -0.270                                            | 0.556 | 0.627   |

| Locus    | Variant    | Fasting Insulin (pg/ml) |        |         | Fasting Proinsulin (adj Fasting Insulin) (pmol/l) |       |         |
|----------|------------|-------------------------|--------|---------|---------------------------------------------------|-------|---------|
|          |            | beta                    | SE     | p-value | beta                                              | SE    | p-value |
| JAZF1    | rs1708302  | -41.023                 | 23.494 | 0.081   | 0.094                                             | 0.542 | 0.863   |
| CRHR2    | rs917195   | 27.274                  | 28.032 | 0.331   | -0.127                                            | 0.644 | 0.844   |
| GCK      | rs878521   | 7.455                   | 27.501 | 0.786   | -0.088                                            | 0.631 | 0.889   |
| FBXL13   | rs11496066 | -80.394                 | 31.339 | 0.011   | 0.495                                             | 0.727 | 0.497   |
| RELN     | rs39328    | 2.998                   | 24.651 | 0.903   | 0.185                                             | 0.566 | 0.744   |
| CTTNBP2  | rs6976111  | 4.443                   | 26.386 | 0.866   | -0.616                                            | 0.605 | 0.309   |
| KLF14    | rs1562396  | 18.770                  | 26.519 | 0.479   | 0.564                                             | 0.609 | 0.355   |
| AOC1     | rs62492368 | -3.193                  | 25.817 | 0.902   | -0.990                                            | 0.591 | 0.095   |
| MNX1     | rs6459733  | 13.506                  | 24.087 | 0.575   | 0.631                                             | 0.554 | 0.255   |
| PPP1R3B  | rs4841132  | 11.184                  | 46.100 | 0.808   | 0.131                                             | 1.057 | 0.901   |
| MSRA     | rs17689007 | -20.371                 | 23.085 | 0.378   | 0.069                                             | 0.531 | 0.897   |
| XKR6     | rs57327348 | -23.695                 | 33.003 | 0.473   | 0.897                                             | 0.757 | 0.237   |
| LPL      | rs10096633 | 24.710                  | 35.243 | 0.484   | -1.190                                            | 0.807 | 0.141   |
| PURG     | rs10954772 | 14.677                  | 25.692 | 0.568   | 0.945                                             | 0.591 | 0.110   |
| ANK1     | rs13262861 | -3.478                  | 29.537 | 0.906   | 0.727                                             | 0.677 | 0.284   |
| TP53INP1 | rs10097617 | 2.485                   | 24.126 | 0.918   | 0.138                                             | 0.556 | 0.804   |
| TRHR     | rs12680028 | 31.236                  | 23.899 | 0.192   | 0.010                                             | 0.552 | 0.986   |
| SLC30A8  | rs3802177  | -27.280                 | 26.422 | 0.302   | 0.541                                             | 0.607 | 0.373   |
| CASC11   | rs17772814 | 1.334                   | 45.032 | 0.976   | 0.088                                             | 1.032 | 0.932   |
| PVT1     | rs1561927  | -18.296                 | 26.245 | 0.486   | -0.775                                            | 0.602 | 0.198   |
| BOP1     | rs4977213  | -38.610                 | 23.893 | 0.107   | -0.364                                            | 0.552 | 0.509   |
| GLIS3    | rs10974438 | -1.986                  | 25.128 | 0.937   | -0.077                                            | 0.578 | 0.895   |
| HAUS6    | rs7022807  | 4.424                   | 24.490 | 0.857   | 0.786                                             | 0.563 | 0.164   |
| FOCAD    | rs7867635  | -26.058                 | 24.555 | 0.289   | 1.586                                             | 0.560 | 0.005   |
| CDKN2A/B | rs10811660 | 4.551                   | 32.916 | 0.890   | -0.501                                            | 0.755 | 0.507   |
| LINGO2   | rs1412234  | -13.861                 | 25.796 | 0.591   | -0.132                                            | 0.595 | 0.824   |
| UBAP2    | rs12001437 | -2.304                  | 24.049 | 0.924   | 0.351                                             | 0.551 | 0.525   |
| MTND2P8  | rs11137820 | 3.247                   | 23.812 | 0.892   | -0.369                                            | 0.548 | 0.501   |
| TLE4     | rs17791513 | 73.745                  | 51.831 | 0.155   | 0.231                                             | 1.192 | 0.846   |
| TLE1     | rs2796441  | -8.824                  | 23.293 | 0.705   | -0.726                                            | 0.535 | 0.175   |

| Locus                | Variant    | Fasting Insulin (pg/ml) |        |         | Fasting Proinsulin (adj Fasting Insulin) (pmol/l) |       |         |
|----------------------|------------|-------------------------|--------|---------|---------------------------------------------------|-------|---------|
|                      |            | beta                    | SE     | p-value | beta                                              | SE    | p-value |
| <i>ZNF169</i>        | rs55653563 | 29.497                  | 26.781 | 0.271   | 0.825                                             | 0.615 | 0.180   |
| <i>ABO</i>           | rs505922   | -50.186                 | 24.597 | 0.042   | -0.181                                            | 0.569 | 0.751   |
| <i>GPSM1</i>         | rs28505901 | 5.333                   | 30.468 | 0.861   | -0.711                                            | 0.699 | 0.310   |
| <i>CDC123/CAMK1D</i> | rs11257655 | -38.283                 | 30.093 | 0.204   | 0.891                                             | 0.691 | 0.198   |
| <i>HKDC1</i>         | rs4746822  | -17.174                 | 24.868 | 0.490   | 0.080                                             | 0.571 | 0.888   |
| <i>NEUROG3</i>       | rs2642588  | 39.318                  | 25.928 | 0.130   | 0.159                                             | 0.601 | 0.791   |
| <i>ZMIZ1</i>         | rs703972   | 24.032                  | 25.073 | 0.338   | 0.351                                             | 0.577 | 0.543   |
| <i>PTEN</i>          | rs11202627 | 28.127                  | 33.525 | 0.402   | 0.881                                             | 0.769 | 0.252   |
| <i>HHEX/IDE</i>      | rs10882101 | 22.056                  | 24.168 | 0.362   | -0.421                                            | 0.556 | 0.449   |
| <i>TCF7L2</i>        | rs7903146  | 12.607                  | 25.073 | 0.615   | -0.138                                            | 0.576 | 0.810   |
| <i>WDR11</i>         | rs72631105 | -40.440                 | 31.869 | 0.205   | -0.688                                            | 0.738 | 0.352   |
| <i>PLEKHA1</i>       | rs2280141  | -17.796                 | 24.208 | 0.463   | 0.049                                             | 0.556 | 0.930   |
| <i>INS/IGF2</i>      | rs4929965  | 5.429                   | 24.501 | 0.825   | 0.481                                             | 0.562 | 0.393   |
| <i>KCNQ1</i>         | rs2237895  | -20.985                 | 23.172 | 0.366   | -0.026                                            | 0.534 | 0.962   |
| <i>KCNJ11</i>        | rs5213     | -36.857                 | 26.000 | 0.157   | 0.085                                             | 0.599 | 0.887   |
| <i>METTL15</i>       | rs4923543  | 40.435                  | 26.189 | 0.123   | -0.723                                            | 0.603 | 0.231   |
| <i>PDHX</i>          | rs2767036  | -58.343                 | 26.009 | 0.025   | -0.409                                            | 0.602 | 0.497   |
| <i>HSD17B12</i>      | rs1061810  | -25.415                 | 26.728 | 0.342   | 0.592                                             | 0.614 | 0.335   |
| <i>CRY2</i>          | rs7115753  | 3.606                   | 24.513 | 0.883   | -0.175                                            | 0.564 | 0.756   |
| <i>CELF1</i>         | rs7124681  | -35.021                 | 23.298 | 0.133   | 0.699                                             | 0.536 | 0.193   |
| <i>MAP3K11</i>       | rs1783541  | 27.269                  | 31.818 | 0.392   | -0.660                                            | 0.730 | 0.366   |
| <i>CENTD2/ARAP1</i>  | rs77464186 | 31.253                  | 33.970 | 0.358   | -0.334                                            | 0.782 | 0.670   |
| <i>MTNR1B</i>        | rs10830963 | 5.335                   | 26.784 | 0.842   | 0.743                                             | 0.614 | 0.227   |
| <i>ETS1</i>          | rs67232546 | -20.442                 | 28.702 | 0.477   | 0.086                                             | 0.660 | 0.897   |
| <i>CDKN1B</i>        | rs2066827  | -129.351                | 36.762 | 0.000   | 0.312                                             | 0.862 | 0.718   |
| <i>ITPR2</i>         | rs718314   | -1.658                  | 27.635 | 0.952   | 0.807                                             | 0.633 | 0.203   |
| <i>KLHDC5</i>        | rs10842994 | 2.478                   | 29.223 | 0.932   | -0.352                                            | 0.670 | 0.600   |
| <i>HMGA2</i>         | rs2258238  | -46.442                 | 37.612 | 0.217   | 0.389                                             | 0.867 | 0.654   |
| <i>TSPAN8/LGR5</i>   | rs1796330  | 9.422                   | 24.512 | 0.701   | -0.072                                            | 0.563 | 0.898   |
| <i>USP44</i>         | rs2197973  | 17.645                  | 23.448 | 0.452   | 1.214                                             | 0.537 | 0.024   |

| Locus           | Variant    | Fasting Insulin (pg/ml) |        |         | Fasting Proinsulin (adj Fasting Insulin) (pmol/l) |       |         |
|-----------------|------------|-------------------------|--------|---------|---------------------------------------------------|-------|---------|
|                 |            | beta                    | SE     | p-value | beta                                              | SE    | p-value |
| <i>RMST</i>     | rs77864822 | -15.363                 | 48.408 | 0.751   | 0.984                                             | 1.110 | 0.376   |
| <i>WSCD2</i>    | rs1426371  | -26.641                 | 30.051 | 0.376   | -0.586                                            | 0.691 | 0.397   |
| <i>KSR2</i>     | rs34965774 | -3.024                  | 34.794 | 0.931   | 0.095                                             | 0.807 | 0.906   |
| <i>HNF1A</i>    | rs56348580 | -1.120                  | 26.307 | 0.966   | -0.246                                            | 0.604 | 0.685   |
| <i>MPHOSPH9</i> | rs4148856  | 62.068                  | 27.039 | 0.022   | 0.600                                             | 0.626 | 0.338   |
| <i>ZNF664</i>   | rs7978610  | -0.110                  | 24.530 | 0.996   | 0.467                                             | 0.564 | 0.408   |
| <i>FBRSL1</i>   | rs12811407 | -14.124                 | 26.124 | 0.589   | -0.402                                            | 0.600 | 0.503   |
| <i>RNF6</i>     | rs34584161 | -1.978                  | 27.098 | 0.942   | -0.733                                            | 0.621 | 0.238   |
| <i>HMGB1</i>    | rs11842871 | 29.611                  | 29.530 | 0.316   | 0.234                                             | 0.679 | 0.730   |
| <i>KL</i>       | rs576674   | -10.337                 | 29.762 | 0.728   | -0.873                                            | 0.687 | 0.204   |
| <i>DLEU1</i>    | rs963740   | 48.605                  | 26.466 | 0.067   | -0.241                                            | 0.611 | 0.693   |
| <i>PCDH17</i>   | rs9537803  | 12.731                  | 26.919 | 0.636   | 0.244                                             | 0.618 | 0.693   |
| <i>SRGAP2D</i>  | rs9563615  | 31.616                  | 27.255 | 0.247   | 0.447                                             | 0.627 | 0.477   |
| <i>SPRY2</i>    | rs1359790  | 4.514                   | 26.590 | 0.865   | -0.909                                            | 0.609 | 0.136   |
| <i>IRS2</i>     | rs7987740  | 57.215                  | 24.928 | 0.022   | 0.104                                             | 0.578 | 0.858   |
| <i>SLC7A7</i>   | rs17122772 | -28.921                 | 30.632 | 0.346   | -1.359                                            | 0.703 | 0.054   |
| <i>AKAP6</i>    | rs17522122 | -5.373                  | 23.919 | 0.822   | 0.255                                             | 0.551 | 0.643   |
| <i>CLEC14A</i>  | rs8017808  | 3.423                   | 26.504 | 0.897   | -0.474                                            | 0.610 | 0.437   |
| <i>NRXN3</i>    | rs17836088 | -22.571                 | 29.487 | 0.444   | -0.617                                            | 0.677 | 0.363   |
| <i>SMEK1</i>    | rs8010382  | 13.043                  | 25.424 | 0.608   | -0.047                                            | 0.585 | 0.937   |
| <i>MARK3</i>    | rs62007683 | 18.658                  | 24.750 | 0.451   | 0.756                                             | 0.568 | 0.184   |
| <i>RASGRP1</i>  | rs34715063 | 31.497                  | 37.134 | 0.397   | -1.148                                            | 0.851 | 0.178   |
| <i>LTK</i>      | rs11070332 | -40.306                 | 23.921 | 0.093   | -0.496                                            | 0.553 | 0.370   |
| <i>ONECUT1</i>  | rs2456530  | -3.962                  | 37.165 | 0.915   | -0.079                                            | 0.865 | 0.927   |
| <i>C2CD4A/B</i> | rs8037894  | -1.067                  | 24.006 | 0.965   | 0.893                                             | 0.550 | 0.105   |
| <i>USP3</i>     | rs7178762  | -21.562                 | 23.979 | 0.369   | -0.247                                            | 0.552 | 0.654   |
| <i>MAP2K5</i>   | rs4776970  | 28.339                  | 24.457 | 0.247   | -0.403                                            | 0.562 | 0.473   |
| <i>PTPN9</i>    | rs13737    | -51.087                 | 26.957 | 0.059   | 0.248                                             | 0.623 | 0.691   |
| <i>HMG20A</i>   | rs1005752  | 1.939                   | 26.193 | 0.941   | 0.108                                             | 0.604 | 0.858   |
| <i>AP3S2</i>    | rs4932265  | 8.019                   | 27.570 | 0.771   | -0.349                                            | 0.633 | 0.581   |



| Locus         | Variant    | Fasting Insulin (pg/ml) |        |         | Fasting Proinsulin (adj Fasting Insulin) (pmol/l) |       |         |
|---------------|------------|-------------------------|--------|---------|---------------------------------------------------|-------|---------|
|               |            | beta                    | SE     | p-value | beta                                              | SE    | p-value |
| <i>PRC1</i>   | rs12910825 | 14.429                  | 24.340 | 0.554   | -0.348                                            | 0.559 | 0.533   |
| <i>ITFG3</i>  | rs6600191  | 44.229                  | 30.852 | 0.152   | 0.638                                             | 0.710 | 0.369   |
| <i>CLUAP1</i> | rs3751837  | -1.653                  | 30.455 | 0.957   | 0.696                                             | 0.699 | 0.319   |
| <i>ATP2A1</i> | rs8046545  | 10.366                  | 25.685 | 0.687   | -0.484                                            | 0.589 | 0.411   |
| <i>FAM57B</i> | rs11642430 | -2.533                  | 25.099 | 0.920   | 0.636                                             | 0.575 | 0.269   |
| <i>FTO</i>    | rs1421085  | 25.253                  | 23.608 | 0.285   | 0.129                                             | 0.542 | 0.812   |
| <i>NFAT5</i>  | rs862320   | -6.892                  | 24.143 | 0.775   | 0.084                                             | 0.554 | 0.879   |
| <i>BCAR1</i>  | rs72802342 | -46.519                 | 46.689 | 0.320   | 2.294                                             | 1.068 | 0.032   |
| <i>CMIP</i>   | rs2925979  | 4.364                   | 25.860 | 0.866   | -0.391                                            | 0.593 | 0.510   |
| <i>SPG7</i>   | rs12920022 | 10.044                  | 35.009 | 0.774   | 0.350                                             | 0.803 | 0.663   |
| <i>ZZEF1</i>  | rs1377807  | 9.785                   | 25.816 | 0.705   | -0.308                                            | 0.595 | 0.604   |
| <i>ATP1B2</i> | rs1641523  | 43.130                  | 24.892 | 0.084   | 0.798                                             | 0.573 | 0.164   |
| <i>GLP2R</i>  | rs7222481  | 58.537                  | 26.062 | 0.025   | 0.049                                             | 0.604 | 0.935   |
| <i>RAI1</i>   | rs4925109  | -42.440                 | 24.069 | 0.078   | -0.508                                            | 0.556 | 0.361   |
| <i>NF1</i>    | rs71372253 | 49.027                  | 45.562 | 0.282   | -1.237                                            | 1.050 | 0.239   |
| <i>HNF1B</i>  | rs10908278 | -31.775                 | 23.888 | 0.184   | 0.304                                             | 0.550 | 0.581   |
| <i>MLX</i>    | rs34855406 | 1.035                   | 27.171 | 0.970   | 0.718                                             | 0.623 | 0.249   |
| <i>TTL6</i>   | rs35895680 | 32.469                  | 25.785 | 0.208   | 0.345                                             | 0.593 | 0.561   |
| <i>ACE</i>    | rs60276348 | -54.290                 | 30.392 | 0.075   | -0.955                                            | 0.706 | 0.177   |
| <i>BPTF</i>   | rs61676547 | 4.880                   | 28.491 | 0.864   | 0.558                                             | 0.654 | 0.393   |
| <i>LAMA1</i>  | rs7240767  | 10.152                  | 23.909 | 0.671   | -0.275                                            | 0.550 | 0.617   |
| <i>COMMD9</i> | rs62080313 | 79.505                  | 35.646 | 0.026   | -0.040                                            | 0.828 | 0.961   |
| <i>TCF4</i>   | rs72926932 | -64.147                 | 44.594 | 0.151   | 0.211                                             | 1.030 | 0.838   |
| <i>WDR7</i>   | rs17684074 | -3.687                  | 28.707 | 0.898   | -0.963                                            | 0.658 | 0.144   |
| <i>GRP</i>    | rs9957145  | -11.246                 | 34.003 | 0.741   | 1.289                                             | 0.779 | 0.099   |
| <i>MC4R</i>   | rs523288   | 13.801                  | 27.521 | 0.616   | -0.057                                            | 0.632 | 0.928   |
| <i>BCL2A</i>  | rs12454712 | 14.720                  | 28.558 | 0.606   | 0.484                                             | 0.656 | 0.461   |
| <i>UHRF1</i>  | rs7249758  | -52.000                 | 29.627 | 0.080   | -0.782                                            | 0.683 | 0.252   |
| <i>INSR</i>   | rs75253922 | -24.540                 | 30.580 | 0.423   | 0.522                                             | 0.703 | 0.458   |
| <i>MAP2K7</i> | rs4804833  | 20.492                  | 24.100 | 0.396   | -0.082                                            | 0.557 | 0.883   |

| Locus              | Variant     | Fasting Insulin (pg/ml) |        |         | Fasting Proinsulin (adj Fasting Insulin) (pmol/l) |       |         |
|--------------------|-------------|-------------------------|--------|---------|---------------------------------------------------|-------|---------|
|                    |             | beta                    | SE     | p-value | beta                                              | SE    | p-value |
| <i>FARSA</i>       | rs3111316   | -33.793                 | 24.227 | 0.164   | 0.710                                             | 0.558 | 0.204   |
| <i>TM6SF2</i>      | rs8107974   | 83.678                  | 47.001 | 0.076   | 0.040                                             | 1.089 | 0.971   |
| <i>PEPD</i>        | rs10406327  | 18.657                  | 23.453 | 0.427   | 1.425                                             | 0.536 | 0.008   |
| <i>TOMM40/APOE</i> | rs429358    | 21.632                  | 37.011 | 0.559   | -1.000                                            | 0.850 | 0.240   |
| <i>GIPR</i>        | rs10406431  | 1.820                   | 24.096 | 0.940   | 0.541                                             | 0.554 | 0.329   |
| <i>ZC3H4</i>       | rs3810291   | 7.884                   | 25.982 | 0.762   | 0.725                                             | 0.595 | 0.224   |
| <i>NKX2.2</i>      | rs13041756  | -0.919                  | 40.549 | 0.982   | -0.344                                            | 0.930 | 0.711   |
| <i>RALY</i>        | rs2268078   | 42.589                  | 25.564 | 0.096   | -0.102                                            | 0.591 | 0.862   |
| <i>EYA2</i>        | rs6063048   | 52.018                  | 28.113 | 0.065   | -0.624                                            | 0.649 | 0.337   |
| <i>CEBPB</i>       | rs11699802  | 34.392                  | 25.247 | 0.174   | -0.008                                            | 0.581 | 0.989   |
| <i>TSHZ2</i>       | rs34454109  | -3.465                  | 29.194 | 0.906   | -0.099                                            | 0.670 | 0.882   |
| <i>GNAS</i>        | rs6070625   | -37.299                 | 23.720 | 0.116   | 0.754                                             | 0.546 | 0.168   |
| <i>TCEA2</i>       | rs59944054  | 12.744                  | 28.387 | 0.654   | -0.115                                            | 0.652 | 0.860   |
| <i>MTMR3/ASCC2</i> | rs6518681   | 40.332                  | 45.721 | 0.378   | 0.888                                             | 1.049 | 0.398   |
| <i>YWHAH</i>       | rs117001013 | -95.332                 | 50.767 | 0.061   | -1.388                                            | 1.169 | 0.236   |
| <i>EP300</i>       | rs5758223   | -62.694                 | 26.940 | 0.020   | 0.385                                             | 0.624 | 0.537   |
| <i>PNPLA3</i>      | rs738408    | 7.587                   | 27.009 | 0.779   | -0.106                                            | 0.620 | 0.865   |
| <i>PIM3</i>        | rs1801645   | 47.661                  | 31.182 | 0.127   | 1.193                                             | 0.721 | 0.099   |

| Locus               | Variant     | Glucose Loading Test - V1 (mmol/l) |       |         | Hemoglobin A1C - V1 (%) |       |         | Hemoglobin A1C - V2 (%) |       |         |
|---------------------|-------------|------------------------------------|-------|---------|-------------------------|-------|---------|-------------------------|-------|---------|
|                     |             | beta                               | SE    | p-value | beta                    | SE    | p-value | beta                    | SE    | p-value |
| <i>MACF1</i>        | rs3768321   | -0.021                             | 0.108 | 0.849   | 0.005                   | 0.019 | 0.778   | -0.007                  | 0.021 | 0.730   |
| <i>FAF1</i>         | rs58432198  | -0.141                             | 0.141 | 0.318   | 0.015                   | 0.024 | 0.546   | 0.021                   | 0.027 | 0.428   |
| <i>PATJ</i>         | rs12140153  | 0.206                              | 0.157 | 0.189   | 0.009                   | 0.028 | 0.736   | 0.015                   | 0.031 | 0.617   |
| <i>PTGFRN</i>       | rs1127215   | 0.074                              | 0.088 | 0.400   | -0.002                  | 0.015 | 0.908   | -0.009                  | 0.017 | 0.591   |
| <i>NOTCH2</i>       | rs1493694   | -0.090                             | 0.151 | 0.554   | 0.009                   | 0.027 | 0.732   | 0.027                   | 0.029 | 0.350   |
| <i>SEC16B</i>       | rs539515    | 0.104                              | 0.117 | 0.374   | 0.005                   | 0.020 | 0.822   | -0.011                  | 0.022 | 0.635   |
| <i>DSTYK</i>        | rs12048743  | 0.040                              | 0.091 | 0.661   | -0.008                  | 0.016 | 0.625   | 0.002                   | 0.017 | 0.911   |
| <i>SRGAP2</i>       | rs9430095   | 0.022                              | 0.088 | 0.804   | -0.004                  | 0.015 | 0.803   | -0.006                  | 0.017 | 0.734   |
| <i>PROX1</i>        | rs340874    | -0.039                             | 0.088 | 0.660   | 0.004                   | 0.016 | 0.816   | 0.013                   | 0.017 | 0.452   |
| <i>LYPLAL1</i>      | rs2820446   | 0.052                              | 0.100 | 0.601   | 0.011                   | 0.017 | 0.512   | 0.014                   | 0.019 | 0.460   |
| <i>ABCB10</i>       | rs348330    | 0.009                              | 0.092 | 0.920   | 0.014                   | 0.016 | 0.379   | 0.016                   | 0.018 | 0.371   |
| <i>GNG4</i>         | rs291367    | 0.186                              | 0.093 | 0.045   | 0.021                   | 0.016 | 0.201   | 0.015                   | 0.018 | 0.410   |
| <i>FAM49A</i>       | rs11680058  | 0.147                              | 0.133 | 0.270   | -0.011                  | 0.023 | 0.639   | -0.024                  | 0.025 | 0.341   |
| <i>DTNB</i>         | rs17802463  | 0.025                              | 0.098 | 0.794   | -0.009                  | 0.017 | 0.601   | -0.016                  | 0.019 | 0.397   |
| <i>GCKR</i>         | rs1260326   | -0.195                             | 0.087 | 0.026   | 0.002                   | 0.015 | 0.902   | 0.019                   | 0.017 | 0.252   |
| <i>THADA</i>        | rs80147536  | -0.030                             | 0.138 | 0.829   | 0.038                   | 0.024 | 0.124   | 0.042                   | 0.027 | 0.114   |
| <i>BNIP1</i>        | rs6545714   | -0.138                             | 0.091 | 0.129   | -0.003                  | 0.016 | 0.852   | -0.007                  | 0.017 | 0.673   |
| <i>BCL11A</i>       | rs243024    | -0.073                             | 0.088 | 0.406   | -0.001                  | 0.015 | 0.927   | -0.027                  | 0.017 | 0.109   |
| <i>CEP68</i>        | rs2249105   | 0.060                              | 0.093 | 0.517   | -0.006                  | 0.016 | 0.718   | -0.018                  | 0.018 | 0.303   |
| <i>GLI2</i>         | rs11688682  | -0.059                             | 0.109 | 0.589   | 0.002                   | 0.019 | 0.904   | 0.004                   | 0.021 | 0.865   |
| <i>PABPC1P2</i>     | rs35999103  | 0.118                              | 0.113 | 0.297   | 0.004                   | 0.020 | 0.858   | 0.010                   | 0.022 | 0.652   |
| <i>CYTIP</i>        | rs13426680  | 0.315                              | 0.178 | 0.077   | 0.014                   | 0.031 | 0.654   | 0.016                   | 0.034 | 0.641   |
| <i>RBMS1</i>        | rs3772071   | 0.133                              | 0.097 | 0.171   | 0.000                   | 0.017 | 0.993   | -0.008                  | 0.019 | 0.657   |
| <i>GRB14/COBLL1</i> | rs10195252  | -0.068                             | 0.095 | 0.472   | 0.006                   | 0.017 | 0.722   | 0.026                   | 0.018 | 0.148   |
| <i>G6PC2</i>        | rs1402837   | -0.012                             | 0.100 | 0.901   | 0.057                   | 0.018 | 0.001   | 0.037                   | 0.019 | 0.053   |
| <i>CRYBA2</i>       | rs113414093 | -0.067                             | 0.361 | 0.853   | -0.019                  | 0.061 | 0.750   | -0.021                  | 0.066 | 0.757   |
| <i>IRS1</i>         | rs2972144   | 0.127                              | 0.096 | 0.187   | 0.033                   | 0.017 | 0.052   | 0.022                   | 0.018 | 0.237   |
| <i>PPARG</i>        | rs11709077  | -0.047                             | 0.143 | 0.743   | -0.005                  | 0.025 | 0.851   | 0.025                   | 0.027 | 0.365   |

| Locus          | Variant    | Glucose Loading Test - V1 (mmol/l) |       |         | Hemoglobin A1C - V1 (%) |       |         | Hemoglobin A1C - V2 (%) |       |         |
|----------------|------------|------------------------------------|-------|---------|-------------------------|-------|---------|-------------------------|-------|---------|
|                |            | beta                               | SE    | p-value | beta                    | SE    | p-value | beta                    | SE    | p-value |
| <i>UBE2E2</i>  | rs35352848 | -0.059                             | 0.110 | 0.593   | -0.007                  | 0.019 | 0.704   | -0.034                  | 0.021 | 0.100   |
| <i>KIF9</i>    | rs11926707 | -0.067                             | 0.093 | 0.471   | -0.004                  | 0.016 | 0.796   | 0.001                   | 0.018 | 0.961   |
| <i>RBM6</i>    | rs4688760  | 0.194                              | 0.099 | 0.050   | -0.004                  | 0.017 | 0.827   | -0.024                  | 0.019 | 0.207   |
| <i>RFT1</i>    | rs2581787  | 0.040                              | 0.090 | 0.654   | -0.012                  | 0.016 | 0.461   | -0.007                  | 0.017 | 0.670   |
| <i>PSMD6</i>   | rs3774723  | 0.070                              | 0.123 | 0.571   | -0.015                  | 0.021 | 0.476   | -0.003                  | 0.024 | 0.903   |
| <i>ADAMTS9</i> | rs9860730  | 0.104                              | 0.093 | 0.261   | -0.005                  | 0.016 | 0.769   | -0.015                  | 0.018 | 0.401   |
| <i>SHQ1</i>    | rs13085136 | 0.081                              | 0.226 | 0.720   | 0.008                   | 0.040 | 0.832   | -0.003                  | 0.043 | 0.942   |
| <i>ROBO2</i>   | rs2272163  | 0.091                              | 0.089 | 0.309   | 0.028                   | 0.016 | 0.075   | 0.034                   | 0.017 | 0.047   |
| <i>ADCY5</i>   | rs11708067 | 0.054                              | 0.108 | 0.618   | -0.001                  | 0.019 | 0.949   | -0.007                  | 0.021 | 0.736   |
| <i>SLC12A8</i> | rs649961   | -0.042                             | 0.088 | 0.632   | -0.007                  | 0.015 | 0.638   | -0.016                  | 0.017 | 0.341   |
| <i>TMCC1</i>   | rs9828772  | 0.023                              | 0.161 | 0.888   | 0.041                   | 0.028 | 0.151   | 0.031                   | 0.031 | 0.314   |
| <i>TSC22D2</i> | rs62271373 | -0.053                             | 0.160 | 0.742   | -0.061                  | 0.028 | 0.029   | -0.015                  | 0.030 | 0.625   |
| <i>MBNL1</i>   | rs13065698 | 0.148                              | 0.092 | 0.106   | -0.016                  | 0.016 | 0.312   | 0.028                   | 0.018 | 0.116   |
| <i>EGFEM1P</i> | rs7629630  | -0.026                             | 0.125 | 0.836   | -0.009                  | 0.022 | 0.696   | 0.015                   | 0.024 | 0.520   |
| <i>SLC2A2</i>  | rs9873618  | 0.141                              | 0.098 | 0.152   | 0.007                   | 0.017 | 0.664   | 0.017                   | 0.019 | 0.371   |
| <i>ABCC5</i>   | rs2872246  | -0.015                             | 0.085 | 0.863   | 0.011                   | 0.015 | 0.459   | 0.008                   | 0.016 | 0.623   |
| <i>IGF2BP2</i> | rs6780171  | -0.023                             | 0.097 | 0.810   | 0.006                   | 0.017 | 0.703   | 0.021                   | 0.018 | 0.260   |
| <i>ST6GAL1</i> | rs3887925  | 0.111                              | 0.089 | 0.212   | 0.012                   | 0.015 | 0.439   | -0.017                  | 0.017 | 0.320   |
| <i>LPP</i>     | rs4686471  | -0.016                             | 0.093 | 0.865   | 0.011                   | 0.016 | 0.489   | 0.019                   | 0.018 | 0.279   |
| <i>MAEA</i>    | rs56337234 | -0.011                             | 0.098 | 0.910   | 0.033                   | 0.017 | 0.051   | 0.000                   | 0.019 | 0.995   |
| <i>HTT</i>     | rs362307   | -0.155                             | 0.174 | 0.372   | 0.044                   | 0.031 | 0.157   | 0.061                   | 0.034 | 0.072   |
| <i>WFS1</i>    | rs10937721 | -0.066                             | 0.089 | 0.454   | 0.001                   | 0.016 | 0.959   | 0.002                   | 0.017 | 0.900   |
| <i>LCORL</i>   | rs12640250 | -0.003                             | 0.105 | 0.975   | -0.024                  | 0.018 | 0.175   | -0.015                  | 0.020 | 0.454   |
| <i>GNPDA2</i>  | rs10938398 | -0.004                             | 0.089 | 0.963   | 0.007                   | 0.015 | 0.641   | 0.015                   | 0.017 | 0.367   |
| <i>USP46</i>   | rs2102278  | 0.162                              | 0.097 | 0.094   | -0.002                  | 0.017 | 0.917   | -0.001                  | 0.019 | 0.938   |
| <i>SCD5</i>    | rs12642790 | -0.002                             | 0.095 | 0.982   | -0.024                  | 0.017 | 0.155   | -0.040                  | 0.018 | 0.027   |
| <i>FAM13A</i>  | rs1903002  | 0.165                              | 0.090 | 0.069   | -0.006                  | 0.016 | 0.680   | -0.005                  | 0.017 | 0.787   |
| <i>SMARCA1</i> | rs6821438  | -0.053                             | 0.091 | 0.557   | 0.018                   | 0.016 | 0.271   | 0.029                   | 0.017 | 0.097   |
| <i>SLC9B1</i>  | rs1580278  | 0.233                              | 0.090 | 0.010   | 0.001                   | 0.016 | 0.955   | -0.012                  | 0.017 | 0.508   |
| <i>PABPC4L</i> | rs1296328  | 0.062                              | 0.093 | 0.503   | -0.004                  | 0.016 | 0.820   | -0.019                  | 0.018 | 0.283   |

| Locus          | Variant    | Glucose Loading Test - V1 (mmol/l) |       |         | Hemoglobin A1C - V1 (%) |       |         | Hemoglobin A1C - V2 (%) |       |         |
|----------------|------------|------------------------------------|-------|---------|-------------------------|-------|---------|-------------------------|-------|---------|
|                |            | beta                               | SE    | p-value | beta                    | SE    | p-value | beta                    | SE    | p-value |
| <i>TMEM154</i> | rs7669833  | 0.046                              | 0.095 | 0.625   | 0.014                   | 0.017 | 0.399   | 0.006                   | 0.018 | 0.741   |
| <i>PDGFC</i>   | rs28819812 | 0.070                              | 0.095 | 0.463   | 0.006                   | 0.017 | 0.712   | 0.004                   | 0.018 | 0.825   |
| <i>ACSL1</i>   | rs58730668 | 0.119                              | 0.133 | 0.372   | -0.001                  | 0.023 | 0.980   | -0.022                  | 0.025 | 0.392   |
| <i>MRPS30</i>  | rs6884702  | -0.113                             | 0.091 | 0.213   | 0.011                   | 0.016 | 0.476   | 0.028                   | 0.017 | 0.105   |
| <i>ITGA1</i>   | rs3811978  | 0.079                              | 0.119 | 0.508   | 0.009                   | 0.021 | 0.671   | -0.009                  | 0.023 | 0.708   |
| <i>ARL15</i>   | rs702634   | -0.050                             | 0.097 | 0.606   | 0.012                   | 0.017 | 0.485   | 0.022                   | 0.019 | 0.240   |
| <i>ANKRD55</i> | rs465002   | 0.096                              | 0.097 | 0.319   | 0.025                   | 0.017 | 0.146   | 0.027                   | 0.019 | 0.149   |
| <i>PIK3R1</i>  | rs4976033  | 0.010                              | 0.087 | 0.911   | 0.023                   | 0.015 | 0.131   | 0.021                   | 0.017 | 0.204   |
| <i>POC5</i>    | rs2307111  | 0.041                              | 0.087 | 0.636   | 0.006                   | 0.015 | 0.711   | -0.003                  | 0.017 | 0.835   |
| <i>ZBED3</i>   | rs4457053  | 0.183                              | 0.096 | 0.058   | -0.007                  | 0.017 | 0.657   | -0.033                  | 0.018 | 0.071   |
| <i>DMGDH</i>   | rs1316776  | -0.110                             | 0.094 | 0.241   | 0.045                   | 0.016 | 0.006   | 0.012                   | 0.018 | 0.520   |
| <i>RASA1</i>   | rs7719891  | 0.063                              | 0.095 | 0.511   | -0.008                  | 0.017 | 0.615   | 0.008                   | 0.018 | 0.667   |
| <i>PCSK1</i>   | rs13179048 | -0.021                             | 0.094 | 0.827   | 0.024                   | 0.016 | 0.150   | 0.047                   | 0.018 | 0.009   |
| <i>PHF15</i>   | rs329122   | -0.020                             | 0.093 | 0.831   | -0.002                  | 0.016 | 0.922   | 0.015                   | 0.018 | 0.398   |
| <i>EBF1</i>    | rs3934712  | -0.127                             | 0.107 | 0.237   | -0.019                  | 0.019 | 0.302   | 0.017                   | 0.020 | 0.418   |
| <i>RREB1</i>   | rs9379084  | 0.127                              | 0.144 | 0.379   | 0.009                   | 0.025 | 0.710   | 0.015                   | 0.028 | 0.582   |
| <i>CDKAL1</i>  | rs7756992  | 0.002                              | 0.101 | 0.988   | 0.020                   | 0.017 | 0.257   | 0.003                   | 0.019 | 0.860   |
| <i>MHC</i>     | rs601945   | 0.134                              | 0.133 | 0.312   | -0.011                  | 0.023 | 0.621   | -0.009                  | 0.025 | 0.709   |
| <i>LRFN2</i>   | rs34298980 | -0.003                             | 0.094 | 0.974   | 0.022                   | 0.016 | 0.175   | 0.001                   | 0.018 | 0.971   |
| <i>VEGFA</i>   | rs6458354  | 0.077                              | 0.100 | 0.441   | 0.011                   | 0.017 | 0.545   | -0.005                  | 0.019 | 0.790   |
| <i>TFAP2B</i>  | rs3798519  | 0.009                              | 0.114 | 0.938   | 0.015                   | 0.020 | 0.450   | 0.045                   | 0.022 | 0.038   |
| <i>BEND3</i>   | rs4946812  | -0.039                             | 0.101 | 0.702   | -0.006                  | 0.017 | 0.748   | -0.017                  | 0.019 | 0.390   |
| <i>CENPW</i>   | rs11759026 | -0.384                             | 0.107 | 0.000   | -0.001                  | 0.019 | 0.966   | -0.006                  | 0.021 | 0.782   |
| <i>SOGA3</i>   | rs2800733  | 0.111                              | 0.100 | 0.266   | 0.001                   | 0.018 | 0.970   | -0.017                  | 0.019 | 0.382   |
| <i>SLC35D3</i> | rs9494624  | 0.051                              | 0.101 | 0.618   | -0.008                  | 0.018 | 0.656   | -0.007                  | 0.019 | 0.711   |
| <i>MIR3668</i> | rs2982521  | -0.058                             | 0.093 | 0.531   | 0.036                   | 0.016 | 0.025   | 0.041                   | 0.018 | 0.022   |
| <i>SLC22A3</i> | rs474513   | 0.113                              | 0.090 | 0.211   | 0.011                   | 0.016 | 0.497   | 0.027                   | 0.017 | 0.113   |
| <i>QKI</i>     | rs4709746  | 0.237                              | 0.132 | 0.073   | 0.016                   | 0.023 | 0.480   | 0.012                   | 0.025 | 0.621   |
| <i>DGKB</i>    | rs10228066 | 0.198                              | 0.089 | 0.027   | 0.001                   | 0.016 | 0.971   | 0.016                   | 0.017 | 0.345   |
| <i>IGF2BP3</i> | rs4279506  | 0.092                              | 0.089 | 0.302   | 0.016                   | 0.016 | 0.310   | 0.014                   | 0.017 | 0.414   |

| Locus    | Variant    | Glucose Loading Test - V1 (mmol/l) |       |         | Hemoglobin A1C - V1 (%) |       |         | Hemoglobin A1C - V2 (%) |       |         |
|----------|------------|------------------------------------|-------|---------|-------------------------|-------|---------|-------------------------|-------|---------|
|          |            | beta                               | SE    | p-value | beta                    | SE    | p-value | beta                    | SE    | p-value |
| JAZF1    | rs1708302  | -0.054                             | 0.087 | 0.538   | -0.036                  | 0.015 | 0.018   | -0.028                  | 0.017 | 0.100   |
| CRHR2    | rs917195   | 0.131                              | 0.103 | 0.206   | -0.023                  | 0.018 | 0.201   | -0.004                  | 0.020 | 0.856   |
| GCK      | rs878521   | -0.057                             | 0.102 | 0.574   | 0.018                   | 0.018 | 0.302   | 0.015                   | 0.019 | 0.435   |
| FBXL13   | rs11496066 | -0.170                             | 0.119 | 0.152   | -0.008                  | 0.020 | 0.702   | -0.016                  | 0.022 | 0.484   |
| RELN     | rs39328    | 0.034                              | 0.091 | 0.706   | 0.005                   | 0.016 | 0.771   | -0.005                  | 0.017 | 0.794   |
| CTTNBP2  | rs6976111  | 0.025                              | 0.097 | 0.794   | -0.002                  | 0.017 | 0.895   | -0.016                  | 0.019 | 0.394   |
| KLF14    | rs1562396  | 0.024                              | 0.097 | 0.804   | 0.028                   | 0.017 | 0.099   | 0.002                   | 0.019 | 0.900   |
| AOC1     | rs62492368 | -0.046                             | 0.095 | 0.627   | 0.017                   | 0.017 | 0.297   | 0.024                   | 0.018 | 0.200   |
| MNX1     | rs6459733  | -0.008                             | 0.090 | 0.927   | 0.003                   | 0.016 | 0.828   | -0.001                  | 0.017 | 0.964   |
| PPP1R3B  | rs4841132  | -0.353                             | 0.175 | 0.044   | -0.027                  | 0.030 | 0.373   | -0.054                  | 0.033 | 0.099   |
| MSRA     | rs17689007 | -0.036                             | 0.086 | 0.679   | -0.010                  | 0.015 | 0.506   | -0.016                  | 0.016 | 0.336   |
| XKR6     | rs57327348 | 0.070                              | 0.121 | 0.566   | 0.014                   | 0.021 | 0.508   | -0.015                  | 0.023 | 0.521   |
| LPL      | rs10096633 | 0.036                              | 0.130 | 0.784   | -0.009                  | 0.023 | 0.684   | -0.028                  | 0.025 | 0.267   |
| PURG     | rs10954772 | 0.001                              | 0.095 | 0.991   | 0.010                   | 0.017 | 0.534   | 0.026                   | 0.018 | 0.144   |
| ANK1     | rs13262861 | -0.113                             | 0.110 | 0.308   | -0.025                  | 0.019 | 0.190   | -0.030                  | 0.021 | 0.155   |
| TP53INP1 | rs10097617 | -0.145                             | 0.089 | 0.105   | 0.020                   | 0.016 | 0.194   | 0.020                   | 0.017 | 0.233   |
| TRHR     | rs12680028 | -0.008                             | 0.089 | 0.926   | 0.010                   | 0.016 | 0.535   | 0.004                   | 0.017 | 0.809   |
| SLC30A8  | rs3802177  | 0.071                              | 0.098 | 0.466   | 0.018                   | 0.017 | 0.302   | 0.014                   | 0.019 | 0.466   |
| CASC11   | rs17772814 | 0.032                              | 0.168 | 0.851   | -0.043                  | 0.029 | 0.138   | -0.035                  | 0.032 | 0.280   |
| PVT1     | rs1561927  | 0.026                              | 0.099 | 0.791   | -0.008                  | 0.017 | 0.647   | -0.027                  | 0.019 | 0.149   |
| BOP1     | rs4977213  | 0.057                              | 0.089 | 0.525   | -0.004                  | 0.015 | 0.784   | 0.001                   | 0.017 | 0.941   |
| GLIS3    | rs10974438 | 0.053                              | 0.092 | 0.565   | -0.001                  | 0.016 | 0.969   | 0.018                   | 0.018 | 0.309   |
| HAUS6    | rs7022807  | 0.110                              | 0.090 | 0.221   | 0.000                   | 0.016 | 0.992   | -0.002                  | 0.017 | 0.907   |
| FOCAD    | rs7867635  | 0.150                              | 0.090 | 0.096   | -0.013                  | 0.016 | 0.405   | -0.019                  | 0.017 | 0.269   |
| CDKN2A/B | rs10811660 | 0.000                              | 0.122 | 1.000   | 0.031                   | 0.021 | 0.140   | 0.011                   | 0.023 | 0.625   |
| LINGO2   | rs1412234  | -0.046                             | 0.095 | 0.629   | -0.007                  | 0.017 | 0.657   | -0.002                  | 0.018 | 0.905   |
| UBAP2    | rs12001437 | 0.051                              | 0.090 | 0.572   | -0.021                  | 0.016 | 0.177   | -0.018                  | 0.017 | 0.280   |
| MTND2P8  | rs11137820 | -0.052                             | 0.088 | 0.555   | -0.024                  | 0.015 | 0.116   | -0.029                  | 0.017 | 0.083   |
| TLE4     | rs17791513 | 0.070                              | 0.189 | 0.710   | 0.000                   | 0.034 | 0.996   | 0.038                   | 0.036 | 0.295   |
| TLE1     | rs2796441  | 0.128                              | 0.087 | 0.141   | 0.023                   | 0.015 | 0.124   | 0.021                   | 0.017 | 0.207   |

| Locus                | Variant    | Glucose Loading Test - V1 (mmol/l) |       |         | Hemoglobin A1C - V1 (%) |       |         | Hemoglobin A1C - V2 (%) |       |         |
|----------------------|------------|------------------------------------|-------|---------|-------------------------|-------|---------|-------------------------|-------|---------|
|                      |            | beta                               | SE    | p-value | beta                    | SE    | p-value | beta                    | SE    | p-value |
| <i>ZNF169</i>        | rs55653563 | -0.025                             | 0.100 | 0.803   | -0.001                  | 0.017 | 0.946   | 0.002                   | 0.019 | 0.931   |
| <i>ABO</i>           | rs505922   | 0.074                              | 0.091 | 0.417   | 0.031                   | 0.016 | 0.053   | 0.021                   | 0.018 | 0.236   |
| <i>GPSM1</i>         | rs28505901 | 0.200                              | 0.113 | 0.078   | -0.019                  | 0.020 | 0.344   | -0.008                  | 0.022 | 0.715   |
| <i>CDC123/CAMK1D</i> | rs11257655 | 0.015                              | 0.111 | 0.889   | 0.050                   | 0.019 | 0.010   | 0.023                   | 0.021 | 0.286   |
| <i>HKDC1</i>         | rs4746822  | 0.025                              | 0.092 | 0.788   | -0.045                  | 0.016 | 0.004   | -0.030                  | 0.018 | 0.083   |
| <i>NEUROG3</i>       | rs2642588  | 0.065                              | 0.097 | 0.504   | 0.003                   | 0.017 | 0.882   | 0.009                   | 0.019 | 0.638   |
| <i>ZMIZ1</i>         | rs703972   | 0.100                              | 0.092 | 0.274   | -0.022                  | 0.016 | 0.174   | -0.003                  | 0.018 | 0.882   |
| <i>PTEN</i>          | rs11202627 | 0.002                              | 0.125 | 0.988   | -0.022                  | 0.022 | 0.316   | -0.004                  | 0.024 | 0.858   |
| <i>HHEX/IDE</i>      | rs10882101 | 0.084                              | 0.089 | 0.350   | -0.002                  | 0.016 | 0.885   | -0.003                  | 0.017 | 0.866   |
| <i>TCF7L2</i>        | rs7903146  | 0.204                              | 0.092 | 0.027   | 0.035                   | 0.016 | 0.030   | 0.031                   | 0.018 | 0.084   |
| <i>WDR11</i>         | rs72631105 | -0.131                             | 0.118 | 0.268   | 0.001                   | 0.021 | 0.951   | 0.013                   | 0.023 | 0.558   |
| <i>PLEKHA1</i>       | rs2280141  | 0.154                              | 0.089 | 0.086   | -0.001                  | 0.016 | 0.955   | -0.005                  | 0.017 | 0.784   |
| <i>INS/IGF2</i>      | rs4929965  | -0.130                             | 0.090 | 0.150   | -0.015                  | 0.016 | 0.347   | -0.013                  | 0.017 | 0.456   |
| <i>KCNQ1</i>         | rs2237895  | 0.218                              | 0.085 | 0.011   | -0.010                  | 0.015 | 0.511   | -0.028                  | 0.016 | 0.088   |
| <i>KCNJ11</i>        | rs5213     | 0.227                              | 0.096 | 0.018   | 0.011                   | 0.017 | 0.509   | -0.002                  | 0.018 | 0.919   |
| <i>METTL15</i>       | rs4923543  | -0.079                             | 0.098 | 0.419   | 0.017                   | 0.017 | 0.328   | 0.011                   | 0.019 | 0.572   |
| <i>PDHX</i>          | rs2767036  | 0.114                              | 0.097 | 0.240   | -0.001                  | 0.017 | 0.960   | 0.007                   | 0.018 | 0.706   |
| <i>HSD17B12</i>      | rs1061810  | -0.094                             | 0.100 | 0.349   | -0.024                  | 0.017 | 0.174   | -0.017                  | 0.019 | 0.375   |
| <i>CRY2</i>          | rs7115753  | 0.032                              | 0.090 | 0.720   | 0.002                   | 0.016 | 0.919   | 0.027                   | 0.017 | 0.126   |
| <i>CELF1</i>         | rs7124681  | 0.209                              | 0.086 | 0.015   | 0.006                   | 0.015 | 0.699   | 0.012                   | 0.017 | 0.457   |
| <i>MAP3K11</i>       | rs1783541  | 0.020                              | 0.116 | 0.862   | 0.030                   | 0.020 | 0.143   | 0.021                   | 0.022 | 0.345   |
| <i>CENTD2/ARAP1</i>  | rs77464186 | 0.051                              | 0.127 | 0.690   | -0.058                  | 0.022 | 0.008   | -0.039                  | 0.024 | 0.106   |
| <i>MTNR1B</i>        | rs10830963 | 0.119                              | 0.100 | 0.233   | 0.004                   | 0.017 | 0.836   | 0.003                   | 0.019 | 0.891   |
| <i>ETS1</i>          | rs67232546 | 0.137                              | 0.107 | 0.200   | 0.003                   | 0.019 | 0.855   | 0.015                   | 0.020 | 0.459   |
| <i>CDKN1B</i>        | rs2066827  | -0.172                             | 0.136 | 0.209   | 0.019                   | 0.024 | 0.422   | 0.013                   | 0.026 | 0.623   |
| <i>ITPR2</i>         | rs718314   | 0.208                              | 0.102 | 0.042   | -0.018                  | 0.018 | 0.304   | -0.020                  | 0.020 | 0.316   |
| <i>KLHDC5</i>        | rs10842994 | 0.009                              | 0.109 | 0.931   | -0.033                  | 0.019 | 0.082   | -0.007                  | 0.021 | 0.747   |
| <i>HMGA2</i>         | rs2258238  | -0.107                             | 0.138 | 0.439   | 0.033                   | 0.025 | 0.173   | 0.010                   | 0.027 | 0.703   |
| <i>TSPAN8/LGR5</i>   | rs1796330  | -0.126                             | 0.091 | 0.164   | -0.040                  | 0.016 | 0.012   | -0.010                  | 0.017 | 0.548   |
| <i>USP44</i>         | rs2197973  | 0.004                              | 0.086 | 0.965   | 0.014                   | 0.015 | 0.356   | 0.002                   | 0.017 | 0.898   |

| Locus           | Variant    | Glucose Loading Test - V1 (mmol/l) |       |         | Hemoglobin A1C - V1 (%) |       |         | Hemoglobin A1C - V2 (%) |       |         |
|-----------------|------------|------------------------------------|-------|---------|-------------------------|-------|---------|-------------------------|-------|---------|
|                 |            | beta                               | SE    | p-value | beta                    | SE    | p-value | beta                    | SE    | p-value |
| <i>RMST</i>     | rs77864822 | 0.016                              | 0.182 | 0.931   | 0.007                   | 0.031 | 0.819   | 0.031                   | 0.034 | 0.373   |
| <i>WSCD2</i>    | rs1426371  | -0.053                             | 0.111 | 0.633   | 0.029                   | 0.019 | 0.134   | 0.009                   | 0.021 | 0.665   |
| <i>KSR2</i>     | rs34965774 | -0.040                             | 0.127 | 0.756   | -0.004                  | 0.022 | 0.866   | 0.025                   | 0.024 | 0.304   |
| <i>HNF1A</i>    | rs56348580 | 0.027                              | 0.097 | 0.778   | 0.001                   | 0.017 | 0.930   | 0.020                   | 0.019 | 0.269   |
| <i>MPHOSPH9</i> | rs4148856  | 0.144                              | 0.102 | 0.156   | 0.024                   | 0.018 | 0.176   | 0.009                   | 0.019 | 0.653   |
| <i>ZNF664</i>   | rs7978610  | 0.054                              | 0.091 | 0.547   | 0.016                   | 0.016 | 0.331   | 0.015                   | 0.017 | 0.400   |
| <i>FBRSL1</i>   | rs12811407 | 0.115                              | 0.097 | 0.237   | 0.025                   | 0.017 | 0.143   | 0.015                   | 0.018 | 0.411   |
| <i>RNF6</i>     | rs34584161 | -0.135                             | 0.101 | 0.181   | 0.023                   | 0.018 | 0.185   | 0.019                   | 0.019 | 0.326   |
| <i>HMGB1</i>    | rs11842871 | 0.040                              | 0.111 | 0.722   | -0.018                  | 0.019 | 0.333   | -0.027                  | 0.021 | 0.204   |
| <i>KL</i>       | rs576674   | -0.086                             | 0.111 | 0.438   | -0.010                  | 0.019 | 0.594   | -0.028                  | 0.021 | 0.190   |
| <i>DLEU1</i>    | rs963740   | 0.047                              | 0.099 | 0.631   | 0.003                   | 0.017 | 0.848   | 0.001                   | 0.019 | 0.957   |
| <i>PCDH17</i>   | rs9537803  | -0.145                             | 0.099 | 0.143   | 0.003                   | 0.017 | 0.860   | -0.005                  | 0.019 | 0.778   |
| <i>SRGAP2D</i>  | rs9563615  | -0.039                             | 0.101 | 0.700   | -0.008                  | 0.018 | 0.651   | -0.008                  | 0.019 | 0.694   |
| <i>SPRY2</i>    | rs1359790  | -0.018                             | 0.099 | 0.854   | 0.010                   | 0.017 | 0.562   | 0.015                   | 0.019 | 0.418   |
| <i>IRS2</i>     | rs7987740  | -0.165                             | 0.093 | 0.078   | -0.009                  | 0.016 | 0.567   | -0.001                  | 0.018 | 0.972   |
| <i>SLC7A7</i>   | rs17122772 | 0.160                              | 0.114 | 0.162   | 0.008                   | 0.020 | 0.696   | -0.024                  | 0.022 | 0.268   |
| <i>AKAP6</i>    | rs17522122 | 0.054                              | 0.089 | 0.542   | -0.007                  | 0.016 | 0.672   | -0.004                  | 0.017 | 0.804   |
| <i>CLEC14A</i>  | rs8017808  | -0.030                             | 0.098 | 0.760   | -0.008                  | 0.017 | 0.642   | 0.004                   | 0.019 | 0.814   |
| <i>NRXN3</i>    | rs17836088 | 0.243                              | 0.109 | 0.026   | 0.010                   | 0.019 | 0.600   | 0.015                   | 0.021 | 0.462   |
| <i>SMEK1</i>    | rs8010382  | -0.101                             | 0.093 | 0.282   | 0.001                   | 0.016 | 0.941   | -0.007                  | 0.018 | 0.679   |
| <i>MARK3</i>    | rs62007683 | 0.036                              | 0.091 | 0.691   | 0.000                   | 0.016 | 0.979   | 0.013                   | 0.017 | 0.466   |
| <i>RASGRP1</i>  | rs34715063 | -0.167                             | 0.139 | 0.230   | -0.002                  | 0.024 | 0.946   | -0.009                  | 0.026 | 0.733   |
| <i>LTK</i>      | rs11070332 | -0.048                             | 0.090 | 0.591   | -0.023                  | 0.016 | 0.139   | -0.037                  | 0.017 | 0.032   |
| <i>ONECUT1</i>  | rs2456530  | -0.179                             | 0.137 | 0.191   | -0.037                  | 0.024 | 0.120   | -0.016                  | 0.026 | 0.542   |
| <i>C2CD4A/B</i> | rs8037894  | 0.154                              | 0.088 | 0.081   | 0.002                   | 0.015 | 0.896   | 0.027                   | 0.017 | 0.106   |
| <i>USP3</i>     | rs7178762  | 0.221                              | 0.088 | 0.013   | 0.013                   | 0.016 | 0.415   | 0.015                   | 0.017 | 0.372   |
| <i>MAP2K5</i>   | rs4776970  | -0.182                             | 0.090 | 0.043   | -0.005                  | 0.016 | 0.733   | -0.022                  | 0.017 | 0.200   |
| <i>PTPN9</i>    | rs13737    | 0.001                              | 0.102 | 0.992   | -0.025                  | 0.018 | 0.161   | -0.032                  | 0.019 | 0.100   |
| <i>HMG20A</i>   | rs1005752  | 0.071                              | 0.097 | 0.467   | -0.006                  | 0.017 | 0.725   | -0.015                  | 0.019 | 0.410   |
| <i>AP3S2</i>    | rs4932265  | 0.019                              | 0.101 | 0.854   | 0.018                   | 0.018 | 0.301   | 0.034                   | 0.019 | 0.083   |



| Locus         | Variant    | Glucose Loading Test - V1 (mmol/l) |       |         | Hemoglobin A1C - V1 (%) |       |         | Hemoglobin A1C - V2 (%) |       |         |
|---------------|------------|------------------------------------|-------|---------|-------------------------|-------|---------|-------------------------|-------|---------|
|               |            | beta                               | SE    | p-value | beta                    | SE    | p-value | beta                    | SE    | p-value |
| <i>PRC1</i>   | rs12910825 | 0.006                              | 0.089 | 0.950   | -0.011                  | 0.016 | 0.494   | 0.003                   | 0.017 | 0.877   |
| <i>ITFG3</i>  | rs6600191  | -0.030                             | 0.115 | 0.795   | -0.042                  | 0.020 | 0.035   | -0.036                  | 0.022 | 0.097   |
| <i>CLUAP1</i> | rs3751837  | 0.003                              | 0.113 | 0.980   | -0.024                  | 0.020 | 0.222   | -0.016                  | 0.021 | 0.469   |
| <i>ATP2A1</i> | rs8046545  | 0.096                              | 0.094 | 0.311   | 0.008                   | 0.017 | 0.635   | 0.002                   | 0.018 | 0.917   |
| <i>FAM57B</i> | rs11642430 | -0.118                             | 0.093 | 0.204   | 0.021                   | 0.016 | 0.197   | 0.038                   | 0.018 | 0.034   |
| <i>FTO</i>    | rs1421085  | -0.066                             | 0.087 | 0.445   | -0.012                  | 0.015 | 0.434   | 0.017                   | 0.017 | 0.301   |
| <i>NFAT5</i>  | rs862320   | -0.071                             | 0.089 | 0.424   | 0.007                   | 0.016 | 0.632   | 0.012                   | 0.017 | 0.490   |
| <i>BCAR1</i>  | rs72802342 | 0.216                              | 0.173 | 0.212   | 0.001                   | 0.030 | 0.971   | 0.013                   | 0.033 | 0.706   |
| <i>CMIP</i>   | rs2925979  | 0.124                              | 0.097 | 0.201   | 0.003                   | 0.017 | 0.872   | 0.000                   | 0.018 | 0.997   |
| <i>SPG7</i>   | rs12920022 | 0.130                              | 0.131 | 0.322   | 0.010                   | 0.023 | 0.674   | 0.049                   | 0.025 | 0.045   |
| <i>ZZEF1</i>  | rs1377807  | -0.010                             | 0.095 | 0.918   | 0.010                   | 0.017 | 0.540   | -0.034                  | 0.018 | 0.064   |
| <i>ATP1B2</i> | rs1641523  | -0.007                             | 0.094 | 0.944   | 0.017                   | 0.016 | 0.300   | 0.011                   | 0.018 | 0.527   |
| <i>GLP2R</i>  | rs7222481  | 0.089                              | 0.097 | 0.362   | 0.012                   | 0.017 | 0.489   | 0.022                   | 0.019 | 0.242   |
| <i>RAI1</i>   | rs4925109  | 0.092                              | 0.089 | 0.303   | -0.004                  | 0.016 | 0.773   | -0.018                  | 0.017 | 0.292   |
| <i>NF1</i>    | rs71372253 | -0.208                             | 0.172 | 0.226   | 0.021                   | 0.029 | 0.466   | 0.012                   | 0.032 | 0.697   |
| <i>HNF1B</i>  | rs10908278 | -0.100                             | 0.089 | 0.262   | 0.009                   | 0.015 | 0.569   | 0.001                   | 0.017 | 0.931   |
| <i>MLX</i>    | rs34855406 | -0.189                             | 0.101 | 0.061   | 0.013                   | 0.018 | 0.473   | -0.002                  | 0.019 | 0.908   |
| <i>TTL6</i>   | rs35895680 | -0.008                             | 0.096 | 0.936   | -0.034                  | 0.017 | 0.040   | -0.022                  | 0.018 | 0.233   |
| <i>ACE</i>    | rs60276348 | -0.017                             | 0.113 | 0.881   | 0.008                   | 0.020 | 0.697   | -0.006                  | 0.022 | 0.787   |
| <i>BPTF</i>   | rs61676547 | -0.132                             | 0.106 | 0.212   | -0.002                  | 0.019 | 0.934   | -0.015                  | 0.020 | 0.452   |
| <i>LAMA1</i>  | rs7240767  | -0.032                             | 0.089 | 0.716   | 0.033                   | 0.015 | 0.034   | 0.035                   | 0.017 | 0.036   |
| <i>COMMD9</i> | rs62080313 | -0.187                             | 0.131 | 0.153   | -0.028                  | 0.023 | 0.218   | -0.012                  | 0.025 | 0.636   |
| <i>TCF4</i>   | rs72926932 | -0.260                             | 0.168 | 0.121   | 0.012                   | 0.029 | 0.678   | 0.000                   | 0.031 | 1.000   |
| <i>WDR7</i>   | rs17684074 | -0.168                             | 0.104 | 0.107   | 0.000                   | 0.018 | 0.991   | 0.002                   | 0.020 | 0.905   |
| <i>GRP</i>    | rs9957145  | 0.344                              | 0.125 | 0.006   | 0.010                   | 0.022 | 0.641   | 0.010                   | 0.024 | 0.667   |
| <i>MC4R</i>   | rs523288   | 0.263                              | 0.100 | 0.009   | 0.042                   | 0.018 | 0.017   | 0.060                   | 0.019 | 0.002   |
| <i>BCL2A</i>  | rs12454712 | 0.125                              | 0.106 | 0.241   | 0.005                   | 0.019 | 0.799   | -0.014                  | 0.020 | 0.488   |
| <i>UHRF1</i>  | rs7249758  | -0.021                             | 0.111 | 0.847   | -0.030                  | 0.019 | 0.122   | -0.012                  | 0.021 | 0.566   |
| <i>INSR</i>   | rs75253922 | -0.065                             | 0.114 | 0.567   | -0.010                  | 0.020 | 0.612   | -0.031                  | 0.022 | 0.148   |
| <i>MAP2K7</i> | rs4804833  | -0.008                             | 0.089 | 0.933   | 0.020                   | 0.016 | 0.212   | 0.008                   | 0.017 | 0.635   |

| Locus              | Variant     | Glucose Loading Test - V1 (mmol/l) |       |         | Hemoglobin A1C - V1 (%) |       |         | Hemoglobin A1C - V2 (%) |       |         |
|--------------------|-------------|------------------------------------|-------|---------|-------------------------|-------|---------|-------------------------|-------|---------|
|                    |             | beta                               | SE    | p-value | beta                    | SE    | p-value | beta                    | SE    | p-value |
| <i>FARSA</i>       | rs3111316   | -0.022                             | 0.091 | 0.811   | 0.026                   | 0.016 | 0.095   | 0.000                   | 0.017 | 0.997   |
| <i>TM6SF2</i>      | rs8107974   | -0.051                             | 0.177 | 0.774   | -0.008                  | 0.031 | 0.786   | -0.016                  | 0.033 | 0.622   |
| <i>PEPD</i>        | rs10406327  | 0.092                              | 0.088 | 0.293   | 0.025                   | 0.015 | 0.101   | 0.019                   | 0.017 | 0.257   |
| <i>TOMM40/APOE</i> | rs429358    | 0.078                              | 0.135 | 0.563   | -0.036                  | 0.024 | 0.127   | 0.014                   | 0.026 | 0.597   |
| <i>GIPR</i>        | rs10406431  | -0.197                             | 0.089 | 0.027   | 0.014                   | 0.016 | 0.376   | -0.008                  | 0.017 | 0.640   |
| <i>ZC3H4</i>       | rs3810291   | -0.114                             | 0.096 | 0.234   | 0.007                   | 0.017 | 0.657   | -0.004                  | 0.018 | 0.816   |
| <i>NKX2.2</i>      | rs13041756  | -0.071                             | 0.150 | 0.637   | 0.019                   | 0.026 | 0.462   | 0.015                   | 0.029 | 0.594   |
| <i>RALY</i>        | rs2268078   | 0.119                              | 0.094 | 0.206   | 0.026                   | 0.016 | 0.121   | 0.011                   | 0.018 | 0.554   |
| <i>EYA2</i>        | rs6063048   | 0.177                              | 0.105 | 0.092   | -0.010                  | 0.018 | 0.587   | -0.002                  | 0.020 | 0.935   |
| <i>CEBPB</i>       | rs11699802  | 0.030                              | 0.094 | 0.751   | -0.023                  | 0.016 | 0.164   | -0.031                  | 0.018 | 0.083   |
| <i>TSHZ2</i>       | rs34454109  | -0.085                             | 0.107 | 0.425   | -0.006                  | 0.019 | 0.758   | -0.008                  | 0.021 | 0.710   |
| <i>GNAS</i>        | rs6070625   | -0.108                             | 0.088 | 0.222   | -0.020                  | 0.015 | 0.185   | -0.025                  | 0.017 | 0.131   |
| <i>TCEA2</i>       | rs59944054  | 0.155                              | 0.106 | 0.145   | -0.004                  | 0.018 | 0.817   | -0.013                  | 0.020 | 0.521   |
| <i>MTMR3/ASCC2</i> | rs6518681   | 0.149                              | 0.169 | 0.377   | -0.016                  | 0.030 | 0.600   | 0.030                   | 0.033 | 0.359   |
| <i>YWHAH</i>       | rs117001013 | 0.124                              | 0.189 | 0.511   | -0.031                  | 0.033 | 0.356   | -0.068                  | 0.036 | 0.063   |
| <i>EP300</i>       | rs5758223   | -0.009                             | 0.100 | 0.928   | 0.023                   | 0.018 | 0.194   | 0.006                   | 0.019 | 0.755   |
| <i>PNPLA3</i>      | rs738408    | -0.011                             | 0.100 | 0.910   | 0.024                   | 0.017 | 0.162   | 0.021                   | 0.019 | 0.280   |
| <i>PIM3</i>        | rs1801645   | -0.066                             | 0.116 | 0.569   | -0.001                  | 0.020 | 0.977   | 0.020                   | 0.022 | 0.358   |

| Locus               | Variant     | HDL - V2 (mmol/l) |       |         | LDL - V2 (mmol/l) |       |         | Fasting Leptin -V2 (pg/ml) |          |         |
|---------------------|-------------|-------------------|-------|---------|-------------------|-------|---------|----------------------------|----------|---------|
|                     |             | beta              | SE    | p-value | beta              | SE    | p-value | beta                       | SE       | p-value |
| <i>MACF1</i>        | rs3768321   | 0.022             | 0.032 | 0.488   | 0.167             | 0.075 | 0.025   | -601.866                   | 926.453  | 0.516   |
| <i>FAF1</i>         | rs58432198  | 0.067             | 0.041 | 0.105   | 0.005             | 0.097 | 0.961   | 1977.645                   | 1192.670 | 0.098   |
| <i>PATJ</i>         | rs12140153  | -0.056            | 0.046 | 0.222   | 0.099             | 0.108 | 0.359   | 459.389                    | 1352.706 | 0.734   |
| <i>PTGFRN</i>       | rs1127215   | 0.033             | 0.026 | 0.196   | 0.064             | 0.061 | 0.290   | -796.641                   | 749.340  | 0.288   |
| <i>NOTCH2</i>       | rs1493694   | -0.022            | 0.044 | 0.613   | -0.251            | 0.104 | 0.016   | -791.950                   | 1299.096 | 0.542   |
| <i>SEC16B</i>       | rs539515    | -0.004            | 0.034 | 0.906   | 0.035             | 0.080 | 0.661   | -1395.318                  | 991.710  | 0.160   |
| <i>DSTYK</i>        | rs12048743  | 0.039             | 0.026 | 0.140   | -0.004            | 0.062 | 0.950   | 504.418                    | 775.244  | 0.516   |
| <i>SRGAP2</i>       | rs9430095   | -0.016            | 0.025 | 0.524   | -0.058            | 0.060 | 0.333   | 988.120                    | 745.299  | 0.185   |
| <i>PROX1</i>        | rs340874    | 0.022             | 0.026 | 0.400   | 0.071             | 0.061 | 0.245   | -48.904                    | 761.585  | 0.949   |
| <i>LYPLAL1</i>      | rs2820446   | -0.033            | 0.029 | 0.264   | 0.073             | 0.069 | 0.291   | 135.460                    | 853.618  | 0.874   |
| <i>ABCB10</i>       | rs348330    | 0.018             | 0.027 | 0.508   | -0.126            | 0.063 | 0.046   | 892.330                    | 788.272  | 0.258   |
| <i>GNG4</i>         | rs291367    | 0.024             | 0.027 | 0.374   | 0.059             | 0.064 | 0.360   | -44.275                    | 793.791  | 0.956   |
| <i>FAM49A</i>       | rs11680058  | -0.066            | 0.038 | 0.083   | -0.004            | 0.090 | 0.967   | 111.336                    | 1120.863 | 0.921   |
| <i>DTNB</i>         | rs17802463  | 0.019             | 0.029 | 0.512   | 0.039             | 0.068 | 0.562   | 294.640                    | 841.180  | 0.726   |
| <i>GCKR</i>         | rs1260326   | 0.039             | 0.025 | 0.123   | 0.085             | 0.060 | 0.155   | 156.705                    | 742.186  | 0.833   |
| <i>THADA</i>        | rs80147536  | -0.004            | 0.041 | 0.920   | -0.075            | 0.096 | 0.438   | -1059.519                  | 1207.053 | 0.380   |
| <i>BNIP1</i>        | rs6545714   | 0.052             | 0.027 | 0.050   | -0.038            | 0.062 | 0.544   | 1957.038                   | 774.018  | 0.012   |
| <i>BCL11A</i>       | rs243024    | -0.019            | 0.026 | 0.459   | -0.091            | 0.060 | 0.131   | -209.339                   | 755.803  | 0.782   |
| <i>CEP68</i>        | rs2249105   | 0.022             | 0.027 | 0.417   | 0.017             | 0.063 | 0.783   | 1219.636                   | 783.125  | 0.120   |
| <i>GLI2</i>         | rs11688682  | -0.007            | 0.031 | 0.828   | -0.083            | 0.074 | 0.265   | 1990.987                   | 921.954  | 0.031   |
| <i>PABPC1P2</i>     | rs35999103  | -0.050            | 0.033 | 0.136   | -0.027            | 0.079 | 0.731   | 1124.375                   | 967.558  | 0.246   |
| <i>CYTIP</i>        | rs13426680  | -0.072            | 0.052 | 0.168   | 0.166             | 0.122 | 0.172   | 246.552                    | 1521.672 | 0.871   |
| <i>RBMS1</i>        | rs3772071   | -0.004            | 0.028 | 0.892   | -0.034            | 0.067 | 0.614   | 36.639                     | 827.695  | 0.965   |
| <i>GRB14/COBLL1</i> | rs10195252  | -0.066            | 0.028 | 0.018   | 0.089             | 0.065 | 0.175   | 556.330                    | 810.918  | 0.493   |
| <i>G6PC2</i>        | rs1402837   | -0.009            | 0.029 | 0.767   | -0.057            | 0.069 | 0.410   | -531.662                   | 861.040  | 0.537   |
| <i>CRYBA2</i>       | rs113414093 | -0.119            | 0.105 | 0.257   | 0.092             | 0.260 | 0.723   | 8870.634                   | 2910.737 | 0.002   |
| <i>IRS1</i>         | rs2972144   | 0.001             | 0.028 | 0.982   | -0.016            | 0.067 | 0.807   | 1074.702                   | 813.234  | 0.187   |
| <i>PPARG</i>        | rs11709077  | -0.059            | 0.041 | 0.154   | 0.096             | 0.098 | 0.327   | -1333.487                  | 1217.609 | 0.274   |

| Locus           | Variant    | HDL - V2 (mmol/l) |       |         | LDL - V2 (mmol/l) |       |         | Fasting Leptin -V2 (pg/ml) |          |         |
|-----------------|------------|-------------------|-------|---------|-------------------|-------|---------|----------------------------|----------|---------|
|                 |            | beta              | SE    | p-value | beta              | SE    | p-value | beta                       | SE       | p-value |
| <i>UBE2E2</i>   | rs35352848 | -0.074            | 0.031 | 0.017   | 0.057             | 0.074 | 0.437   | -535.124                   | 911.188  | 0.557   |
| <i>KIF9</i>     | rs11926707 | -0.042            | 0.027 | 0.126   | 0.014             | 0.064 | 0.826   | 155.248                    | 791.372  | 0.845   |
| <i>RBM6</i>     | rs4688760  | -0.035            | 0.029 | 0.230   | 0.030             | 0.068 | 0.661   | 420.007                    | 838.168  | 0.616   |
| <i>RFT1</i>     | rs2581787  | -0.058            | 0.026 | 0.027   | -0.014            | 0.061 | 0.818   | 143.329                    | 759.035  | 0.850   |
| <i>PSMD6</i>    | rs3774723  | 0.008             | 0.036 | 0.820   | 0.143             | 0.084 | 0.090   | -1104.013                  | 1040.104 | 0.289   |
| <i>ADAMTS9</i>  | rs9860730  | -0.045            | 0.027 | 0.097   | 0.036             | 0.064 | 0.577   | -576.092                   | 791.659  | 0.467   |
| <i>SHQ1</i>     | rs13085136 | -0.070            | 0.066 | 0.285   | -0.146            | 0.154 | 0.342   | 3338.400                   | 1916.483 | 0.082   |
| <i>ROBO2</i>    | rs2272163  | -0.051            | 0.026 | 0.050   | 0.007             | 0.062 | 0.906   | -239.504                   | 771.391  | 0.756   |
| <i>ADCY5</i>    | rs11708067 | 0.032             | 0.032 | 0.314   | 0.058             | 0.075 | 0.443   | 1265.208                   | 922.593  | 0.171   |
| <i>SLC12A8</i>  | rs649961   | 0.020             | 0.026 | 0.437   | 0.042             | 0.061 | 0.493   | -759.087                   | 753.572  | 0.314   |
| <i>TMCC1</i>    | rs9828772  | 0.044             | 0.048 | 0.356   | 0.028             | 0.115 | 0.811   | 1079.904                   | 1374.069 | 0.432   |
| <i>TSC22D2</i>  | rs62271373 | 0.020             | 0.047 | 0.671   | 0.113             | 0.111 | 0.309   | -1134.090                  | 1355.291 | 0.403   |
| <i>MBNL1</i>    | rs13065698 | -0.047            | 0.027 | 0.083   | 0.079             | 0.063 | 0.216   | -565.850                   | 785.074  | 0.471   |
| <i>EGFEM1P</i>  | rs7629630  | 0.011             | 0.037 | 0.768   | 0.076             | 0.086 | 0.381   | 77.576                     | 1067.930 | 0.942   |
| <i>SLC2A2</i>   | rs9873618  | -0.043            | 0.029 | 0.134   | 0.026             | 0.068 | 0.706   | 1160.021                   | 834.006  | 0.165   |
| <i>ABCC5</i>    | rs2872246  | 0.006             | 0.025 | 0.796   | -0.045            | 0.059 | 0.438   | 186.358                    | 729.334  | 0.798   |
| <i>IGF2BP2</i>  | rs6780171  | 0.003             | 0.028 | 0.906   | -0.003            | 0.066 | 0.964   | -389.079                   | 826.725  | 0.638   |
| <i>ST6GAL1</i>  | rs3887925  | 0.000             | 0.026 | 0.990   | 0.136             | 0.061 | 0.026   | -1107.902                  | 755.181  | 0.143   |
| <i>LPP</i>      | rs4686471  | 0.032             | 0.027 | 0.235   | 0.012             | 0.063 | 0.851   | 1113.860                   | 782.480  | 0.155   |
| <i>MAEA</i>     | rs56337234 | -0.004            | 0.028 | 0.882   | 0.038             | 0.067 | 0.570   | -267.798                   | 835.961  | 0.749   |
| <i>HTT</i>      | rs362307   | -0.096            | 0.052 | 0.063   | -0.033            | 0.122 | 0.789   | 1339.887                   | 1501.287 | 0.373   |
| <i>WFS1</i>     | rs10937721 | 0.021             | 0.026 | 0.409   | 0.014             | 0.061 | 0.823   | -1485.181                  | 760.644  | 0.051   |
| <i>LCORL</i>    | rs12640250 | 0.007             | 0.030 | 0.813   | 0.016             | 0.071 | 0.818   | -559.200                   | 879.721  | 0.525   |
| <i>GNPDA2</i>   | rs10938398 | -0.031            | 0.026 | 0.233   | -0.024            | 0.061 | 0.698   | 1508.234                   | 754.345  | 0.046   |
| <i>USP46</i>    | rs2102278  | 0.026             | 0.028 | 0.367   | 0.158             | 0.067 | 0.018   | 713.897                    | 830.148  | 0.390   |
| <i>SCD5</i>     | rs12642790 | 0.027             | 0.028 | 0.331   | 0.116             | 0.066 | 0.078   | -849.039                   | 804.410  | 0.292   |
| <i>FAM13A</i>   | rs1903002  | -0.041            | 0.026 | 0.116   | -0.037            | 0.062 | 0.546   | 960.036                    | 767.320  | 0.211   |
| <i>SMARCAD1</i> | rs6821438  | -0.021            | 0.027 | 0.422   | 0.015             | 0.063 | 0.812   | 414.315                    | 773.430  | 0.592   |
| <i>SLC9B1</i>   | rs1580278  | 0.015             | 0.027 | 0.563   | 0.075             | 0.062 | 0.228   | -540.343                   | 773.355  | 0.485   |
| <i>PABPC4L</i>  | rs1296328  | -0.020            | 0.027 | 0.453   | 0.003             | 0.064 | 0.968   | -248.026                   | 791.843  | 0.754   |

| Locus          | Variant    | HDL - V2 (mmol/l) |       |         | LDL - V2 (mmol/l) |       |         | Fasting Leptin -V2 (pg/ml) |          |         |
|----------------|------------|-------------------|-------|---------|-------------------|-------|---------|----------------------------|----------|---------|
|                |            | beta              | SE    | p-value | beta              | SE    | p-value | beta                       | SE       | p-value |
| <i>TMEM154</i> | rs7669833  | 0.020             | 0.028 | 0.462   | 0.025             | 0.065 | 0.703   | 34.106                     | 814.973  | 0.967   |
| <i>PDGFC</i>   | rs28819812 | 0.036             | 0.028 | 0.189   | 0.018             | 0.065 | 0.789   | -336.773                   | 808.506  | 0.677   |
| <i>ACSL1</i>   | rs58730668 | -0.040            | 0.039 | 0.301   | 0.004             | 0.092 | 0.966   | -1627.884                  | 1114.593 | 0.145   |
| <i>MRPS30</i>  | rs6884702  | 0.020             | 0.026 | 0.453   | -0.005            | 0.062 | 0.937   | -699.860                   | 768.057  | 0.363   |
| <i>ITGA1</i>   | rs3811978  | -0.035            | 0.035 | 0.326   | -0.003            | 0.084 | 0.970   | 3301.788                   | 1007.708 | 0.001   |
| <i>ARL15</i>   | rs702634   | 0.043             | 0.028 | 0.128   | 0.036             | 0.067 | 0.595   | -320.063                   | 827.048  | 0.699   |
| <i>ANKRD55</i> | rs465002   | -0.026            | 0.028 | 0.368   | -0.011            | 0.067 | 0.868   | 1076.838                   | 834.214  | 0.197   |
| <i>PIK3R1</i>  | rs4976033  | 0.016             | 0.025 | 0.523   | -0.036            | 0.060 | 0.552   | 2262.269                   | 737.823  | 0.002   |
| <i>POC5</i>    | rs2307111  | -0.005            | 0.026 | 0.836   | -0.033            | 0.060 | 0.585   | 758.046                    | 743.834  | 0.309   |
| <i>ZBED3</i>   | rs4457053  | 0.013             | 0.028 | 0.631   | 0.020             | 0.066 | 0.758   | -1354.000                  | 818.061  | 0.098   |
| <i>DMGDH</i>   | rs1316776  | -0.010            | 0.027 | 0.718   | -0.135            | 0.065 | 0.038   | -332.306                   | 801.180  | 0.678   |
| <i>RASA1</i>   | rs7719891  | 0.025             | 0.028 | 0.373   | -0.050            | 0.066 | 0.445   | 271.372                    | 807.291  | 0.737   |
| <i>PCSK1</i>   | rs13179048 | 0.025             | 0.028 | 0.374   | -0.035            | 0.065 | 0.590   | -623.895                   | 804.587  | 0.438   |
| <i>PHF15</i>   | rs329122   | -0.002            | 0.027 | 0.937   | -0.026            | 0.064 | 0.678   | 1215.895                   | 789.924  | 0.124   |
| <i>EBF1</i>    | rs3934712  | 0.062             | 0.031 | 0.045   | -0.001            | 0.074 | 0.989   | 1158.565                   | 907.996  | 0.202   |
| <i>RREB1</i>   | rs9379084  | -0.009            | 0.042 | 0.833   | -0.027            | 0.099 | 0.789   | 33.722                     | 1235.768 | 0.978   |
| <i>CDKAL1</i>  | rs7756992  | 0.047             | 0.029 | 0.106   | -0.092            | 0.068 | 0.177   | -569.367                   | 842.700  | 0.500   |
| <i>MHC</i>     | rs601945   | 0.039             | 0.039 | 0.316   | 0.018             | 0.091 | 0.846   | 216.070                    | 1131.933 | 0.849   |
| <i>LRFN2</i>   | rs34298980 | 0.016             | 0.027 | 0.565   | -0.060            | 0.064 | 0.352   | -1308.801                  | 803.822  | 0.104   |
| <i>VEGFA</i>   | rs6458354  | 0.021             | 0.029 | 0.482   | -0.032            | 0.069 | 0.644   | 17.041                     | 853.920  | 0.984   |
| <i>TFAP2B</i>  | rs3798519  | -0.039            | 0.033 | 0.241   | -0.004            | 0.079 | 0.958   | -925.478                   | 985.508  | 0.348   |
| <i>BEND3</i>   | rs4946812  | -0.031            | 0.029 | 0.288   | -0.041            | 0.069 | 0.555   | 259.322                    | 853.222  | 0.761   |
| <i>CENPW</i>   | rs11759026 | -0.005            | 0.032 | 0.862   | -0.011            | 0.074 | 0.879   | -567.072                   | 925.134  | 0.540   |
| <i>SOGA3</i>   | rs2800733  | 0.047             | 0.029 | 0.106   | -0.017            | 0.069 | 0.806   | 1001.701                   | 851.098  | 0.240   |
| <i>SLC35D3</i> | rs9494624  | 0.029             | 0.030 | 0.324   | -0.024            | 0.070 | 0.734   | -265.849                   | 860.112  | 0.757   |
| <i>MIR3668</i> | rs2982521  | 0.059             | 0.027 | 0.029   | -0.084            | 0.064 | 0.192   | 512.430                    | 784.287  | 0.514   |
| <i>SLC22A3</i> | rs474513   | -0.008            | 0.026 | 0.754   | -0.014            | 0.062 | 0.821   | -145.304                   | 762.540  | 0.849   |
| <i>QKI</i>     | rs4709746  | 0.012             | 0.038 | 0.755   | -0.060            | 0.088 | 0.496   | 468.983                    | 1103.328 | 0.671   |
| <i>DGKB</i>    | rs10228066 | -0.041            | 0.026 | 0.108   | 0.023             | 0.061 | 0.701   | 421.166                    | 760.399  | 0.580   |
| <i>IGF2BP3</i> | rs4279506  | 0.002             | 0.026 | 0.929   | -0.070            | 0.062 | 0.260   | -623.473                   | 762.319  | 0.414   |

| Locus           | Variant    | HDL - V2 (mmol/l) |       |         | LDL - V2 (mmol/l) |       |         | Fasting Leptin -V2 (pg/ml) |          |         |
|-----------------|------------|-------------------|-------|---------|-------------------|-------|---------|----------------------------|----------|---------|
|                 |            | beta              | SE    | p-value | beta              | SE    | p-value | beta                       | SE       | p-value |
| <i>JAZF1</i>    | rs1708302  | 0.003             | 0.025 | 0.902   | -0.074            | 0.060 | 0.217   | -695.751                   | 741.798  | 0.349   |
| <i>CRHR2</i>    | rs917195   | -0.025            | 0.031 | 0.415   | -0.091            | 0.073 | 0.213   | 1309.642                   | 884.101  | 0.139   |
| <i>GCK</i>      | rs878521   | -0.030            | 0.030 | 0.310   | 0.012             | 0.070 | 0.865   | -219.140                   | 864.167  | 0.800   |
| <i>FBXL13</i>   | rs11496066 | -0.003            | 0.034 | 0.929   | -0.150            | 0.080 | 0.062   | -1488.125                  | 993.525  | 0.135   |
| <i>RELN</i>     | rs39328    | 0.005             | 0.027 | 0.844   | -0.039            | 0.063 | 0.531   | -679.234                   | 777.181  | 0.383   |
| <i>CTTNBP2</i>  | rs6976111  | -0.007            | 0.028 | 0.818   | 0.020             | 0.067 | 0.766   | -1157.948                  | 831.463  | 0.164   |
| <i>KLF14</i>    | rs1562396  | -0.001            | 0.028 | 0.969   | -0.061            | 0.067 | 0.357   | -167.923                   | 835.258  | 0.841   |
| <i>AOC1</i>     | rs62492368 | 0.016             | 0.028 | 0.562   | -0.052            | 0.066 | 0.436   | 309.342                    | 815.173  | 0.704   |
| <i>MNX1</i>     | rs6459733  | 0.014             | 0.026 | 0.588   | -0.044            | 0.062 | 0.475   | 792.645                    | 757.498  | 0.296   |
| <i>PPP1R3B</i>  | rs4841132  | -0.006            | 0.050 | 0.903   | -0.236            | 0.119 | 0.047   | -338.050                   | 1450.377 | 0.816   |
| <i>MSRA</i>     | rs17689007 | 0.003             | 0.025 | 0.892   | -0.050            | 0.059 | 0.393   | -88.474                    | 729.461  | 0.904   |
| <i>XKR6</i>     | rs57327348 | 0.020             | 0.035 | 0.561   | -0.064            | 0.083 | 0.438   | -640.434                   | 1042.831 | 0.539   |
| <i>LPL</i>      | rs10096633 | -0.055            | 0.038 | 0.152   | -0.173            | 0.090 | 0.055   | -390.208                   | 1113.825 | 0.726   |
| <i>PURG</i>     | rs10954772 | -0.015            | 0.028 | 0.587   | 0.047             | 0.065 | 0.470   | 371.318                    | 808.558  | 0.646   |
| <i>ANK1</i>     | rs13262861 | -0.042            | 0.032 | 0.184   | 0.073             | 0.076 | 0.333   | 122.579                    | 930.223  | 0.895   |
| <i>TP53INP1</i> | rs10097617 | 0.029             | 0.026 | 0.267   | -0.082            | 0.062 | 0.188   | 179.567                    | 762.892  | 0.814   |
| <i>TRHR</i>     | rs12680028 | 0.020             | 0.026 | 0.442   | 0.021             | 0.061 | 0.727   | 656.885                    | 756.358  | 0.385   |
| <i>SLC30A8</i>  | rs3802177  | 0.038             | 0.028 | 0.183   | 0.116             | 0.067 | 0.084   | -452.361                   | 831.342  | 0.587   |
| <i>CASC11</i>   | rs17772814 | -0.013            | 0.049 | 0.785   | 0.218             | 0.115 | 0.057   | -2359.814                  | 1419.937 | 0.097   |
| <i>PVT1</i>     | rs1561927  | 0.021             | 0.028 | 0.456   | -0.065            | 0.067 | 0.337   | 130.388                    | 829.036  | 0.875   |
| <i>BOP1</i>     | rs4977213  | 0.009             | 0.026 | 0.737   | 0.026             | 0.061 | 0.667   | -786.322                   | 754.284  | 0.298   |
| <i>GLIS3</i>    | rs10974438 | 0.020             | 0.027 | 0.457   | 0.184             | 0.063 | 0.004   | -244.746                   | 793.513  | 0.758   |
| <i>HAUS6</i>    | rs7022807  | -0.025            | 0.026 | 0.334   | 0.093             | 0.062 | 0.132   | 658.503                    | 771.646  | 0.394   |
| <i>FOCAD</i>    | rs7867635  | 0.022             | 0.026 | 0.398   | -0.047            | 0.062 | 0.451   | 524.404                    | 775.809  | 0.499   |
| <i>CDKN2A/B</i> | rs10811660 | 0.019             | 0.035 | 0.585   | 0.066             | 0.082 | 0.423   | -1376.326                  | 1036.964 | 0.185   |
| <i>LINGO2</i>   | rs1412234  | 0.031             | 0.028 | 0.278   | -0.087            | 0.066 | 0.192   | -453.584                   | 814.145  | 0.578   |
| <i>UBAP2</i>    | rs12001437 | -0.003            | 0.026 | 0.913   | -0.076            | 0.061 | 0.216   | 1538.071                   | 755.720  | 0.042   |
| <i>MTND2P8</i>  | rs11137820 | -0.034            | 0.026 | 0.186   | 0.035             | 0.061 | 0.564   | 884.171                    | 750.324  | 0.239   |
| <i>TLE4</i>     | rs17791513 | 0.021             | 0.055 | 0.709   | 0.068             | 0.130 | 0.603   | 986.092                    | 1630.682 | 0.546   |
| <i>TLE1</i>     | rs2796441  | -0.005            | 0.025 | 0.847   | 0.012             | 0.059 | 0.841   | -23.343                    | 735.115  | 0.975   |

| Locus                | Variant    | HDL - V2 (mmol/l) |       |         | LDL - V2 (mmol/l) |       |         | Fasting Leptin -V2 (pg/ml) |          |         |
|----------------------|------------|-------------------|-------|---------|-------------------|-------|---------|----------------------------|----------|---------|
|                      |            | beta              | SE    | p-value | beta              | SE    | p-value | beta                       | SE       | p-value |
| <i>ZNF169</i>        | rs55653563 | -0.007            | 0.029 | 0.800   | -0.138            | 0.068 | 0.041   | 356.357                    | 846.395  | 0.674   |
| <i>ABO</i>           | rs505922   | 0.029             | 0.027 | 0.287   | 0.091             | 0.063 | 0.149   | -1798.094                  | 773.682  | 0.020   |
| <i>GPSM1</i>         | rs28505901 | -0.005            | 0.033 | 0.872   | -0.027            | 0.078 | 0.733   | -99.038                    | 961.538  | 0.918   |
| <i>CDC123/CAMK1D</i> | rs11257655 | 0.032             | 0.032 | 0.320   | 0.050             | 0.076 | 0.506   | 455.294                    | 945.077  | 0.630   |
| <i>HKDC1</i>         | rs4746822  | -0.003            | 0.027 | 0.906   | -0.020            | 0.064 | 0.753   | 1059.100                   | 782.603  | 0.176   |
| <i>NEUROG3</i>       | rs2642588  | 0.011             | 0.028 | 0.705   | 0.028             | 0.066 | 0.673   | 153.276                    | 819.838  | 0.852   |
| <i>ZMIZ1</i>         | rs703972   | 0.013             | 0.027 | 0.628   | -0.006            | 0.064 | 0.928   | 867.138                    | 789.570  | 0.273   |
| <i>PTEN</i>          | rs11202627 | 0.035             | 0.037 | 0.343   | 0.017             | 0.086 | 0.840   | -588.995                   | 1059.693 | 0.579   |
| <i>HHEX/IDE</i>      | rs10882101 | -0.013            | 0.026 | 0.629   | -0.061            | 0.061 | 0.323   | 1456.754                   | 760.118  | 0.056   |
| <i>TCF7L2</i>        | rs7903146  | 0.011             | 0.027 | 0.684   | 0.055             | 0.064 | 0.389   | -209.595                   | 791.067  | 0.791   |
| <i>WDR11</i>         | rs72631105 | 0.047             | 0.034 | 0.173   | 0.149             | 0.081 | 0.066   | -573.457                   | 1005.996 | 0.569   |
| <i>PLEKHA1</i>       | rs2280141  | 0.021             | 0.026 | 0.425   | 0.002             | 0.062 | 0.974   | 906.295                    | 764.904  | 0.237   |
| <i>INS/IGF2</i>      | rs4929965  | 0.022             | 0.027 | 0.410   | 0.015             | 0.063 | 0.814   | 1041.215                   | 771.293  | 0.178   |
| <i>KCNQ1</i>         | rs2237895  | 0.012             | 0.025 | 0.631   | -0.044            | 0.059 | 0.458   | -553.583                   | 731.688  | 0.450   |
| <i>KCNJ11</i>        | rs5213     | 0.012             | 0.028 | 0.667   | -0.038            | 0.067 | 0.570   | -50.066                    | 821.783  | 0.951   |
| <i>METTL15</i>       | rs4923543  | -0.004            | 0.028 | 0.880   | 0.000             | 0.067 | 0.998   | -912.374                   | 827.491  | 0.271   |
| <i>PDHX</i>          | rs2767036  | 0.037             | 0.028 | 0.198   | -0.016            | 0.067 | 0.807   | -989.063                   | 823.906  | 0.230   |
| <i>HSD17B12</i>      | rs1061810  | -0.036            | 0.029 | 0.208   | -0.026            | 0.069 | 0.706   | 320.814                    | 843.494  | 0.704   |
| <i>CRY2</i>          | rs7115753  | -0.023            | 0.027 | 0.377   | 0.080             | 0.062 | 0.202   | -672.423                   | 772.770  | 0.385   |
| <i>CELF1</i>         | rs7124681  | 0.049             | 0.025 | 0.050   | 0.050             | 0.059 | 0.400   | -1167.810                  | 734.625  | 0.112   |
| <i>MAP3K11</i>       | rs1783541  | 0.016             | 0.035 | 0.647   | -0.145            | 0.081 | 0.075   | 70.590                     | 997.647  | 0.944   |
| <i>CENTD2/ARAP1</i>  | rs77464186 | -0.062            | 0.037 | 0.093   | -0.025            | 0.086 | 0.776   | 639.317                    | 1073.666 | 0.552   |
| <i>MTNR1B</i>        | rs10830963 | -0.008            | 0.029 | 0.789   | -0.022            | 0.068 | 0.742   | 663.884                    | 844.739  | 0.432   |
| <i>ETS1</i>          | rs67232546 | -0.023            | 0.031 | 0.451   | 0.110             | 0.073 | 0.132   | -1567.835                  | 903.742  | 0.083   |
| <i>CDKN1B</i>        | rs2066827  | 0.058             | 0.040 | 0.150   | 0.096             | 0.094 | 0.310   | -2184.832                  | 1170.163 | 0.062   |
| <i>ITPR2</i>         | rs718314   | -0.024            | 0.030 | 0.411   | 0.046             | 0.070 | 0.509   | 268.894                    | 872.250  | 0.758   |
| <i>KLHDC5</i>        | rs10842994 | -0.036            | 0.032 | 0.261   | 0.066             | 0.075 | 0.376   | 501.882                    | 922.493  | 0.587   |
| <i>HMGA2</i>         | rs2258238  | 0.062             | 0.041 | 0.131   | 0.185             | 0.097 | 0.056   | -316.077                   | 1190.068 | 0.791   |
| <i>TSPAN8/LGR5</i>   | rs1796330  | -0.034            | 0.026 | 0.197   | -0.017            | 0.062 | 0.791   | 1032.631                   | 772.208  | 0.182   |
| <i>USP44</i>         | rs2197973  | 0.049             | 0.025 | 0.052   | -0.112            | 0.059 | 0.059   | -49.087                    | 740.711  | 0.947   |

| Locus           | Variant    | HDL - V2 (mmol/l) |       |         | LDL - V2 (mmol/l) |       |         | Fasting Leptin -V2 (pg/ml) |          |         |
|-----------------|------------|-------------------|-------|---------|-------------------|-------|---------|----------------------------|----------|---------|
|                 |            | beta              | SE    | p-value | beta              | SE    | p-value | beta                       | SE       | p-value |
| <i>RMST</i>     | rs77864822 | -0.001            | 0.053 | 0.978   | -0.168            | 0.123 | 0.173   | 1106.467                   | 1521.444 | 0.467   |
| <i>WSCD2</i>    | rs1426371  | 0.034             | 0.033 | 0.307   | 0.040             | 0.077 | 0.603   | 1615.081                   | 946.717  | 0.089   |
| <i>KSR2</i>     | rs34965774 | -0.037            | 0.038 | 0.323   | 0.055             | 0.088 | 0.533   | -540.368                   | 1097.254 | 0.623   |
| <i>HNF1A</i>    | rs56348580 | -0.027            | 0.028 | 0.346   | 0.019             | 0.067 | 0.779   | -600.358                   | 818.730  | 0.464   |
| <i>MPHOSPH9</i> | rs4148856  | -0.018            | 0.029 | 0.548   | 0.110             | 0.069 | 0.111   | 1205.160                   | 856.092  | 0.160   |
| <i>ZNF664</i>   | rs7978610  | -0.016            | 0.027 | 0.550   | 0.012             | 0.064 | 0.845   | -472.213                   | 775.070  | 0.543   |
| <i>FBRSL1</i>   | rs12811407 | 0.002             | 0.028 | 0.938   | 0.039             | 0.067 | 0.565   | -422.263                   | 824.587  | 0.609   |
| <i>RNF6</i>     | rs34584161 | 0.051             | 0.029 | 0.079   | 0.030             | 0.069 | 0.663   | 72.202                     | 855.445  | 0.933   |
| <i>HMGB1</i>    | rs11842871 | -0.026            | 0.032 | 0.411   | -0.150            | 0.075 | 0.045   | 114.248                    | 932.593  | 0.903   |
| <i>KL</i>       | rs576674   | -0.015            | 0.032 | 0.652   | 0.031             | 0.076 | 0.682   | -52.712                    | 940.080  | 0.955   |
| <i>DLEU1</i>    | rs963740   | 0.002             | 0.029 | 0.948   | 0.053             | 0.068 | 0.431   | -222.566                   | 838.136  | 0.791   |
| <i>PCDH17</i>   | rs9537803  | -0.076            | 0.029 | 0.010   | -0.060            | 0.069 | 0.391   | 859.301                    | 849.034  | 0.312   |
| <i>SRGAP2D</i>  | rs9563615  | 0.015             | 0.029 | 0.598   | -0.010            | 0.069 | 0.890   | 139.325                    | 857.573  | 0.871   |
| <i>SPRY2</i>    | rs1359790  | -0.019            | 0.029 | 0.509   | 0.036             | 0.068 | 0.596   | -1131.791                  | 837.690  | 0.177   |
| <i>IRS2</i>     | rs7987740  | 0.014             | 0.027 | 0.606   | -0.077            | 0.064 | 0.232   | 1037.100                   | 788.152  | 0.189   |
| <i>SLC7A7</i>   | rs17122772 | -0.031            | 0.033 | 0.345   | -0.124            | 0.078 | 0.114   | -2719.957                  | 960.368  | 0.005   |
| <i>AKAP6</i>    | rs17522122 | 0.027             | 0.026 | 0.308   | 0.013             | 0.061 | 0.830   | 17.932                     | 750.902  | 0.981   |
| <i>CLEC14A</i>  | rs8017808  | -0.030            | 0.029 | 0.288   | -0.122            | 0.067 | 0.069   | 268.709                    | 836.933  | 0.748   |
| <i>NRXN3</i>    | rs17836088 | -0.010            | 0.032 | 0.754   | -0.083            | 0.075 | 0.269   | 614.908                    | 930.851  | 0.509   |
| <i>SMEK1</i>    | rs8010382  | -0.006            | 0.027 | 0.817   | 0.064             | 0.065 | 0.324   | 362.953                    | 800.156  | 0.650   |
| <i>MARK3</i>    | rs62007683 | 0.017             | 0.027 | 0.514   | -0.059            | 0.063 | 0.350   | 526.691                    | 781.194  | 0.500   |
| <i>RASGRP1</i>  | rs34715063 | -0.016            | 0.041 | 0.691   | 0.000             | 0.098 | 0.997   | -406.628                   | 1171.439 | 0.729   |
| <i>LTK</i>      | rs11070332 | 0.040             | 0.026 | 0.128   | -0.049            | 0.062 | 0.427   | -1089.468                  | 755.005  | 0.150   |
| <i>ONECUT1</i>  | rs2456530  | -0.033            | 0.040 | 0.413   | -0.002            | 0.094 | 0.986   | -325.864                   | 1171.731 | 0.781   |
| <i>C2CD4A/B</i> | rs8037894  | -0.012            | 0.026 | 0.638   | 0.149             | 0.061 | 0.014   | 704.700                    | 744.054  | 0.344   |
| <i>USP3</i>     | rs7178762  | 0.005             | 0.026 | 0.846   | -0.004            | 0.062 | 0.942   | 789.723                    | 757.914  | 0.298   |
| <i>MAP2K5</i>   | rs4776970  | 0.006             | 0.026 | 0.830   | -0.008            | 0.062 | 0.892   | 0.778                      | 772.762  | 0.999   |
| <i>PTPN9</i>    | rs13737    | 0.020             | 0.029 | 0.487   | 0.085             | 0.069 | 0.220   | -516.599                   | 853.357  | 0.545   |
| <i>HMG20A</i>   | rs1005752  | 0.014             | 0.028 | 0.628   | 0.021             | 0.067 | 0.757   | -554.704                   | 823.274  | 0.501   |
| <i>AP3S2</i>    | rs4932265  | 0.006             | 0.030 | 0.850   | 0.082             | 0.070 | 0.237   | 217.483                    | 866.689  | 0.802   |



| Locus         | Variant    | HDL - V2 (mmol/l) |       |         | LDL - V2 (mmol/l) |       |         | Fasting Leptin -V2 (pg/ml) |          |         |
|---------------|------------|-------------------|-------|---------|-------------------|-------|---------|----------------------------|----------|---------|
|               |            | beta              | SE    | p-value | beta              | SE    | p-value | beta                       | SE       | p-value |
| <i>PRC1</i>   | rs12910825 | 0.005             | 0.026 | 0.848   | -0.091            | 0.062 | 0.142   | 333.315                    | 767.721  | 0.664   |
| <i>ITFG3</i>  | rs6600191  | -0.008            | 0.033 | 0.820   | -0.037            | 0.080 | 0.644   | -1041.445                  | 974.488  | 0.286   |
| <i>CLUAP1</i> | rs3751837  | -0.021            | 0.033 | 0.513   | 0.037             | 0.077 | 0.632   | 154.133                    | 961.115  | 0.873   |
| <i>ATP2A1</i> | rs8046545  | 0.011             | 0.027 | 0.689   | -0.042            | 0.065 | 0.517   | -655.146                   | 808.148  | 0.418   |
| <i>FAM57B</i> | rs11642430 | -0.014            | 0.027 | 0.603   | 0.023             | 0.064 | 0.720   | 240.683                    | 792.569  | 0.761   |
| <i>FTO</i>    | rs1421085  | -0.011            | 0.026 | 0.653   | -0.023            | 0.060 | 0.708   | 713.083                    | 745.790  | 0.339   |
| <i>NFAT5</i>  | rs862320   | 0.032             | 0.026 | 0.226   | -0.109            | 0.062 | 0.079   | -57.407                    | 759.477  | 0.940   |
| <i>BCAR1</i>  | rs72802342 | 0.042             | 0.051 | 0.410   | 0.129             | 0.119 | 0.278   | 528.338                    | 1476.816 | 0.721   |
| <i>CMIP</i>   | rs2925979  | -0.025            | 0.028 | 0.375   | -0.085            | 0.067 | 0.201   | -197.313                   | 816.536  | 0.809   |
| <i>SPG7</i>   | rs12920022 | -0.005            | 0.038 | 0.891   | 0.120             | 0.090 | 0.182   | -67.384                    | 1105.776 | 0.951   |
| <i>ZZEF1</i>  | rs1377807  | -0.015            | 0.028 | 0.583   | 0.032             | 0.066 | 0.633   | -46.687                    | 814.460  | 0.954   |
| <i>ATP1B2</i> | rs1641523  | 0.039             | 0.027 | 0.151   | -0.015            | 0.064 | 0.812   | 1288.678                   | 785.354  | 0.101   |
| <i>GLP2R</i>  | rs7222481  | -0.022            | 0.028 | 0.428   | -0.008            | 0.067 | 0.904   | 897.630                    | 826.177  | 0.278   |
| <i>RAI1</i>   | rs4925109  | -0.005            | 0.026 | 0.837   | -0.047            | 0.061 | 0.444   | -1303.975                  | 756.279  | 0.085   |
| <i>NF1</i>    | rs71372253 | 0.078             | 0.049 | 0.110   | 0.094             | 0.116 | 0.419   | -35.972                    | 1435.212 | 0.980   |
| <i>HNF1B</i>  | rs10908278 | -0.005            | 0.026 | 0.847   | 0.015             | 0.061 | 0.801   | -104.028                   | 755.292  | 0.891   |
| <i>MLX</i>    | rs34855406 | 0.015             | 0.030 | 0.618   | -0.107            | 0.070 | 0.126   | -870.259                   | 856.930  | 0.310   |
| <i>TTL6</i>   | rs35895680 | 0.036             | 0.028 | 0.204   | -0.037            | 0.066 | 0.577   | 1098.477                   | 813.103  | 0.177   |
| <i>ACE</i>    | rs60276348 | -0.018            | 0.033 | 0.584   | 0.066             | 0.078 | 0.397   | -160.242                   | 962.571  | 0.868   |
| <i>BPTF</i>   | rs61676547 | 0.007             | 0.031 | 0.819   | 0.036             | 0.072 | 0.621   | -1577.691                  | 896.986  | 0.079   |
| <i>LAMA1</i>  | rs7240767  | 0.014             | 0.026 | 0.585   | 0.013             | 0.061 | 0.836   | -952.314                   | 753.295  | 0.207   |
| <i>COMMD9</i> | rs62080313 | 0.013             | 0.038 | 0.741   | -0.074            | 0.090 | 0.413   | -790.792                   | 1116.213 | 0.479   |
| <i>TCF4</i>   | rs72926932 | -0.063            | 0.047 | 0.186   | 0.074             | 0.112 | 0.509   | -620.840                   | 1411.906 | 0.660   |
| <i>WDR7</i>   | rs17684074 | 0.014             | 0.031 | 0.644   | 0.097             | 0.072 | 0.180   | 273.528                    | 901.494  | 0.762   |
| <i>GRP</i>    | rs9957145  | 0.040             | 0.037 | 0.270   | 0.061             | 0.087 | 0.482   | 1177.701                   | 1071.636 | 0.272   |
| <i>MC4R</i>   | rs523288   | -0.032            | 0.030 | 0.279   | 0.015             | 0.070 | 0.827   | 1284.557                   | 867.314  | 0.139   |
| <i>BCL2A</i>  | rs12454712 | 0.016             | 0.031 | 0.599   | 0.001             | 0.073 | 0.989   | -643.005                   | 902.048  | 0.476   |
| <i>UHRF1</i>  | rs7249758  | 0.023             | 0.032 | 0.482   | -0.025            | 0.075 | 0.743   | -92.895                    | 937.250  | 0.921   |
| <i>INSR</i>   | rs75253922 | 0.034             | 0.034 | 0.308   | 0.028             | 0.080 | 0.726   | -23.446                    | 964.519  | 0.981   |
| <i>MAP2K7</i> | rs4804833  | 0.020             | 0.026 | 0.451   | -0.006            | 0.062 | 0.923   | 218.942                    | 750.034  | 0.770   |

| Locus              | Variant     | HDL - V2 (mmol/l) |       |         | LDL - V2 (mmol/l) |       |         | Fasting Leptin -V2 (pg/ml) |          |         |
|--------------------|-------------|-------------------|-------|---------|-------------------|-------|---------|----------------------------|----------|---------|
|                    |             | beta              | SE    | p-value | beta              | SE    | p-value | beta                       | SE       | p-value |
| <i>FARSA</i>       | rs3111316   | -0.006            | 0.026 | 0.815   | 0.020             | 0.062 | 0.752   | -575.507                   | 766.042  | 0.453   |
| <i>TM6SF2</i>      | rs8107974   | 0.101             | 0.051 | 0.049   | 0.016             | 0.122 | 0.897   | 283.562                    | 1489.907 | 0.849   |
| <i>PEPD</i>        | rs10406327  | -0.013            | 0.026 | 0.618   | 0.007             | 0.060 | 0.902   | 477.156                    | 739.490  | 0.519   |
| <i>TOMM40/APOE</i> | rs429358    | 0.111             | 0.040 | 0.006   | -0.380            | 0.093 | 0.000   | 846.387                    | 1164.247 | 0.468   |
| <i>GIPR</i>        | rs10406431  | -0.041            | 0.026 | 0.117   | -0.050            | 0.061 | 0.416   | 417.108                    | 760.823  | 0.584   |
| <i>ZC3H4</i>       | rs3810291   | 0.009             | 0.028 | 0.756   | 0.040             | 0.066 | 0.542   | 413.912                    | 820.366  | 0.614   |
| <i>NKX2.2</i>      | rs13041756  | 0.025             | 0.044 | 0.577   | -0.113            | 0.103 | 0.273   | -621.268                   | 1281.263 | 0.628   |
| <i>RALY</i>        | rs2268078   | 0.030             | 0.028 | 0.273   | -0.026            | 0.065 | 0.684   | 605.448                    | 806.688  | 0.453   |
| <i>EYA2</i>        | rs6063048   | -0.011            | 0.030 | 0.707   | 0.014             | 0.072 | 0.844   | -765.300                   | 889.451  | 0.390   |
| <i>CEBPB</i>       | rs11699802  | -0.016            | 0.028 | 0.554   | -0.047            | 0.065 | 0.468   | -98.137                    | 797.194  | 0.902   |
| <i>TSHZ2</i>       | rs34454109  | 0.016             | 0.031 | 0.608   | -0.132            | 0.074 | 0.076   | 1122.043                   | 919.926  | 0.223   |
| <i>GNAS</i>        | rs6070625   | 0.037             | 0.025 | 0.147   | -0.002            | 0.060 | 0.968   | -612.270                   | 747.600  | 0.413   |
| <i>TCEA2</i>       | rs59944054  | -0.039            | 0.031 | 0.201   | -0.111            | 0.073 | 0.129   | 666.968                    | 895.531  | 0.457   |
| <i>MTMR3/ASCC2</i> | rs6518681   | 0.003             | 0.050 | 0.957   | -0.061            | 0.118 | 0.604   | 389.070                    | 1446.069 | 0.788   |
| <i>YWHAH</i>       | rs117001013 | 0.024             | 0.055 | 0.669   | 0.055             | 0.130 | 0.669   | -3488.743                  | 1603.178 | 0.030   |
| <i>EP300</i>       | rs5758223   | -0.008            | 0.029 | 0.784   | 0.077             | 0.069 | 0.267   | -286.134                   | 854.341  | 0.738   |
| <i>PNPLA3</i>      | rs738408    | 0.020             | 0.029 | 0.492   | 0.015             | 0.069 | 0.823   | -1074.566                  | 847.884  | 0.206   |
| <i>PIM3</i>        | rs1801645   | 0.072             | 0.035 | 0.039   | -0.015            | 0.082 | 0.858   | 1555.391                   | 982.340  | 0.114   |

| Locus               | Variant     | Fasting Leptin (adj BMI) -V2 (pg/ml) |          |         | Matsuda Sensitivity Index (adj BMI) |       |         | Matsuda Sensitivity Index |       |         |
|---------------------|-------------|--------------------------------------|----------|---------|-------------------------------------|-------|---------|---------------------------|-------|---------|
|                     |             | beta                                 | SE       | p-value | beta                                | SE    | p-value | beta                      | SE    | p-value |
| <i>MACF1</i>        | rs3768321   | 329.826                              | 757.180  | 0.663   | -0.308                              | 0.363 | 0.396   | -0.061                    | 0.388 | 0.875   |
| <i>FAF1</i>         | rs58432198  | 1262.082                             | 975.996  | 0.196   | -0.659                              | 0.473 | 0.164   | -0.797                    | 0.505 | 0.115   |
| <i>PATJ</i>         | rs12140153  | 50.339                               | 1104.840 | 0.964   | 0.027                               | 0.531 | 0.959   | -0.013                    | 0.567 | 0.982   |
| <i>PTGFRN</i>       | rs1127215   | -696.474                             | 611.140  | 0.255   | 0.048                               | 0.296 | 0.871   | 0.095                     | 0.318 | 0.764   |
| <i>NOTCH2</i>       | rs1493694   | -1597.456                            | 1064.039 | 0.134   | 0.663                               | 0.511 | 0.195   | 0.485                     | 0.546 | 0.375   |
| <i>SEC16B</i>       | rs539515    | -2267.238                            | 805.985  | 0.005   | 0.326                               | 0.391 | 0.404   | 0.149                     | 0.418 | 0.722   |
| <i>DSTYK</i>        | rs12048743  | 584.746                              | 631.340  | 0.355   | -0.405                              | 0.304 | 0.184   | -0.374                    | 0.326 | 0.252   |
| <i>SRGAP2</i>       | rs9430095   | 798.645                              | 608.192  | 0.190   | -0.131                              | 0.294 | 0.656   | -0.144                    | 0.315 | 0.647   |
| <i>PROX1</i>        | rs340874    | 730.519                              | 622.884  | 0.241   | -0.334                              | 0.301 | 0.267   | -0.075                    | 0.321 | 0.816   |
| <i>LYPLAL1</i>      | rs2820446   | -325.788                             | 696.322  | 0.640   | -0.693                              | 0.333 | 0.038   | -0.757                    | 0.357 | 0.034   |
| <i>ABCB10</i>       | rs348330    | 460.870                              | 643.663  | 0.474   | 0.287                               | 0.311 | 0.357   | 0.207                     | 0.333 | 0.536   |
| <i>GNG4</i>         | rs291367    | 207.600                              | 648.189  | 0.749   | 0.210                               | 0.313 | 0.503   | 0.297                     | 0.335 | 0.377   |
| <i>FAM49A</i>       | rs11680058  | 615.213                              | 913.668  | 0.501   | 0.070                               | 0.440 | 0.873   | 0.198                     | 0.471 | 0.674   |
| <i>DTNB</i>         | rs17802463  | 221.454                              | 685.973  | 0.747   | -0.015                              | 0.329 | 0.964   | -0.006                    | 0.353 | 0.986   |
| <i>GCKR</i>         | rs1260326   | -353.627                             | 607.877  | 0.561   | 0.057                               | 0.293 | 0.845   | -0.153                    | 0.313 | 0.626   |
| <i>THADA</i>        | rs80147536  | -439.665                             | 985.017  | 0.656   | -0.014                              | 0.472 | 0.976   | 0.178                     | 0.506 | 0.724   |
| <i>BNIP1</i>        | rs6545714   | 1377.890                             | 632.359  | 0.030   | -0.142                              | 0.306 | 0.644   | -0.279                    | 0.327 | 0.394   |
| <i>BCL11A</i>       | rs243024    | 363.606                              | 616.931  | 0.556   | -0.052                              | 0.298 | 0.861   | 0.064                     | 0.319 | 0.840   |
| <i>CEP68</i>        | rs2249105   | 534.428                              | 641.293  | 0.405   | 0.214                               | 0.311 | 0.492   | 0.038                     | 0.332 | 0.910   |
| <i>GLI2</i>         | rs11688682  | 1254.741                             | 754.827  | 0.097   | -0.534                              | 0.364 | 0.143   | -0.765                    | 0.389 | 0.050   |
| <i>PABPC1P2</i>     | rs35999103  | 242.553                              | 791.444  | 0.759   | 0.143                               | 0.380 | 0.708   | -0.023                    | 0.407 | 0.955   |
| <i>CYTIP</i>        | rs13426680  | 218.903                              | 1239.822 | 0.860   | -0.454                              | 0.599 | 0.448   | -0.460                    | 0.642 | 0.473   |
| <i>RBMS1</i>        | rs3772071   | 407.925                              | 675.387  | 0.546   | -0.138                              | 0.324 | 0.671   | -0.012                    | 0.348 | 0.973   |
| <i>GRB14/COBLL1</i> | rs10195252  | 619.132                              | 660.412  | 0.349   | -0.264                              | 0.317 | 0.406   | -0.241                    | 0.340 | 0.479   |
| <i>G6PC2</i>        | rs1402837   | -670.244                             | 705.345  | 0.342   | 0.634                               | 0.338 | 0.061   | 0.571                     | 0.361 | 0.114   |
| <i>CRYBA2</i>       | rs113414093 | 6212.808                             | 2433.018 | 0.011   | -0.443                              | 1.181 | 0.708   | -1.052                    | 1.251 | 0.401   |
| <i>IRS1</i>         | rs2972144   | 325.110                              | 665.197  | 0.625   | -0.146                              | 0.320 | 0.648   | -0.313                    | 0.343 | 0.362   |
| <i>PPARG</i>        | rs11709077  | -809.337                             | 996.116  | 0.417   | -0.776                              | 0.477 | 0.104   | -0.586                    | 0.510 | 0.251   |

| Locus          | Variant    | Fasting Leptin (adj BMI) -V2 (pg/ml) |          |         | Matsuda Sensitivity Index (adj BMI) |       |         | Matsuda Sensitivity Index |       |         |
|----------------|------------|--------------------------------------|----------|---------|-------------------------------------|-------|---------|---------------------------|-------|---------|
|                |            | beta                                 | SE       | p-value | beta                                | SE    | p-value | beta                      | SE    | p-value |
| <i>UBE2E2</i>  | rs35352848 | -480.386                             | 742.901  | 0.518   | 0.033                               | 0.357 | 0.926   | 0.061                     | 0.382 | 0.874   |
| <i>KIF9</i>    | rs11926707 | 30.840                               | 646.430  | 0.962   | -0.022                              | 0.310 | 0.944   | -0.068                    | 0.333 | 0.838   |
| <i>RBM6</i>    | rs4688760  | -2.221                               | 684.179  | 0.997   | -0.055                              | 0.330 | 0.868   | -0.146                    | 0.353 | 0.679   |
| <i>RFT1</i>    | rs2581787  | 64.136                               | 619.872  | 0.918   | -0.025                              | 0.297 | 0.932   | -0.087                    | 0.319 | 0.785   |
| <i>PSMD6</i>   | rs3774723  | -910.711                             | 847.959  | 0.283   | -0.470                              | 0.408 | 0.250   | -0.425                    | 0.437 | 0.331   |
| <i>ADAMTS9</i> | rs9860730  | -557.406                             | 645.469  | 0.388   | -0.273                              | 0.310 | 0.380   | -0.226                    | 0.333 | 0.496   |
| <i>SHQ1</i>    | rs13085136 | 533.536                              | 1578.216 | 0.735   | -1.455                              | 0.763 | 0.057   | -2.286                    | 0.809 | 0.005   |
| <i>ROBO2</i>   | rs2272163  | -983.071                             | 629.608  | 0.119   | 0.528                               | 0.304 | 0.083   | 0.329                     | 0.325 | 0.312   |
| <i>ADCY5</i>   | rs11708067 | 398.632                              | 754.779  | 0.598   | -0.535                              | 0.362 | 0.140   | -0.742                    | 0.387 | 0.055   |
| <i>SLC12A8</i> | rs649961   | -112.781                             | 616.952  | 0.855   | -0.326                              | 0.297 | 0.272   | -0.191                    | 0.317 | 0.548   |
| <i>TMCC1</i>   | rs9828772  | 239.146                              | 1121.162 | 0.831   | -0.125                              | 0.542 | 0.817   | -0.379                    | 0.580 | 0.515   |
| <i>TSC22D2</i> | rs62271373 | -788.310                             | 1104.617 | 0.476   | -0.702                              | 0.534 | 0.189   | -0.645                    | 0.572 | 0.260   |
| <i>MBNL1</i>   | rs13065698 | -662.794                             | 640.751  | 0.301   | 0.621                               | 0.307 | 0.043   | 0.621                     | 0.328 | 0.059   |
| <i>EGFEM1P</i> | rs7629630  | -199.227                             | 870.497  | 0.819   | -0.154                              | 0.419 | 0.714   | -0.243                    | 0.449 | 0.588   |
| <i>SLC2A2</i>  | rs9873618  | 692.793                              | 680.984  | 0.309   | -0.327                              | 0.329 | 0.321   | -0.460                    | 0.352 | 0.192   |
| <i>ABCC5</i>   | rs2872246  | -353.940                             | 595.481  | 0.552   | 0.376                               | 0.287 | 0.190   | 0.261                     | 0.308 | 0.397   |
| <i>IGF2BP2</i> | rs6780171  | -194.060                             | 674.567  | 0.774   | 0.064                               | 0.324 | 0.843   | 0.108                     | 0.347 | 0.755   |
| <i>ST6GAL1</i> | rs3887925  | -131.857                             | 620.483  | 0.832   | 0.121                               | 0.300 | 0.687   | 0.384                     | 0.319 | 0.229   |
| <i>LPP</i>     | rs4686471  | 688.246                              | 638.701  | 0.282   | 0.252                               | 0.308 | 0.413   | 0.111                     | 0.330 | 0.737   |
| <i>MAEA</i>    | rs56337234 | -68.375                              | 682.322  | 0.920   | -0.356                              | 0.328 | 0.278   | -0.277                    | 0.352 | 0.431   |
| <i>HTT</i>     | rs362307   | 764.340                              | 1224.280 | 0.533   | -0.023                              | 0.603 | 0.970   | -0.254                    | 0.646 | 0.694   |
| <i>WFS1</i>    | rs10937721 | -1744.635                            | 617.603  | 0.005   | 0.184                               | 0.300 | 0.539   | 0.124                     | 0.321 | 0.700   |
| <i>LCORL</i>   | rs12640250 | -424.499                             | 717.664  | 0.554   | 0.223                               | 0.345 | 0.518   | 0.294                     | 0.369 | 0.427   |
| <i>GNPDA2</i>  | rs10938398 | 874.812                              | 617.395  | 0.157   | -0.401                              | 0.298 | 0.179   | -0.550                    | 0.318 | 0.084   |
| <i>USP46</i>   | rs2102278  | 1012.497                             | 676.457  | 0.135   | 0.413                               | 0.326 | 0.205   | 0.529                     | 0.349 | 0.130   |
| <i>SCD5</i>    | rs12642790 | -447.195                             | 656.448  | 0.496   | 0.749                               | 0.315 | 0.018   | 0.864                     | 0.337 | 0.011   |
| <i>FAM13A</i>  | rs1903002  | 1161.270                             | 625.567  | 0.064   | -0.302                              | 0.302 | 0.317   | -0.207                    | 0.324 | 0.523   |
| <i>SMARCA1</i> | rs6821438  | 18.524                               | 630.641  | 0.977   | -0.191                              | 0.304 | 0.531   | -0.296                    | 0.326 | 0.364   |
| <i>SLC9B1</i>  | rs1580278  | -294.482                             | 631.134  | 0.641   | -0.212                              | 0.305 | 0.488   | -0.151                    | 0.327 | 0.644   |
| <i>PABPC4L</i> | rs1296328  | -609.417                             | 647.161  | 0.347   | 0.149                               | 0.312 | 0.632   | 0.146                     | 0.334 | 0.662   |

| Locus          | Variant    | Fasting Leptin (adj BMI) -V2 (pg/ml) |          |         | Matsuda Sensitivity Index (adj BMI) |       |         | Matsuda Sensitivity Index |       |         |
|----------------|------------|--------------------------------------|----------|---------|-------------------------------------|-------|---------|---------------------------|-------|---------|
|                |            | beta                                 | SE       | p-value | beta                                | SE    | p-value | beta                      | SE    | p-value |
| <i>TMEM154</i> | rs7669833  | -368.368                             | 665.034  | 0.580   | 0.028                               | 0.321 | 0.931   | -0.117                    | 0.344 | 0.733   |
| <i>PDGFC</i>   | rs28819812 | 662.857                              | 661.197  | 0.317   | -0.476                              | 0.317 | 0.134   | -0.252                    | 0.339 | 0.458   |
| <i>ACSL1</i>   | rs58730668 | -1241.307                            | 908.984  | 0.173   | -0.036                              | 0.439 | 0.934   | 0.111                     | 0.470 | 0.814   |
| <i>MRPS30</i>  | rs6884702  | -1313.672                            | 626.473  | 0.036   | 0.282                               | 0.303 | 0.352   | 0.093                     | 0.324 | 0.774   |
| <i>ITGA1</i>   | rs3811978  | 2588.347                             | 823.521  | 0.002   | -0.756                              | 0.401 | 0.060   | -0.888                    | 0.429 | 0.039   |
| <i>ARL15</i>   | rs702634   | -243.553                             | 676.727  | 0.719   | 0.366                               | 0.326 | 0.262   | 0.324                     | 0.349 | 0.353   |
| <i>ANKRD55</i> | rs465002   | 956.353                              | 680.067  | 0.160   | -0.847                              | 0.325 | 0.009   | -0.895                    | 0.348 | 0.010   |
| <i>PIK3R1</i>  | rs4976033  | 1305.592                             | 609.516  | 0.033   | -0.356                              | 0.295 | 0.228   | -0.650                    | 0.313 | 0.038   |
| <i>POC5</i>    | rs2307111  | 340.631                              | 608.295  | 0.576   | -0.215                              | 0.294 | 0.464   | -0.294                    | 0.314 | 0.349   |
| <i>ZBED3</i>   | rs4457053  | -872.869                             | 668.089  | 0.192   | 0.084                               | 0.325 | 0.795   | 0.229                     | 0.348 | 0.511   |
| <i>DMGDH</i>   | rs1316776  | -111.115                             | 653.499  | 0.865   | 0.244                               | 0.317 | 0.442   | 0.249                     | 0.340 | 0.463   |
| <i>RASA1</i>   | rs7719891  | 557.823                              | 658.009  | 0.397   | -0.260                              | 0.317 | 0.412   | -0.215                    | 0.340 | 0.526   |
| <i>PCSK1</i>   | rs13179048 | -772.177                             | 655.699  | 0.239   | 0.211                               | 0.315 | 0.504   | 0.221                     | 0.338 | 0.513   |
| <i>PHF15</i>   | rs329122   | 614.579                              | 646.349  | 0.342   | -0.124                              | 0.312 | 0.692   | -0.231                    | 0.334 | 0.489   |
| <i>EBF1</i>    | rs3934712  | 1066.717                             | 740.272  | 0.150   | 0.087                               | 0.360 | 0.810   | 0.054                     | 0.386 | 0.888   |
| <i>RREB1</i>   | rs9379084  | 392.784                              | 1018.131 | 0.700   | 0.153                               | 0.487 | 0.754   | 0.344                     | 0.516 | 0.506   |
| <i>CDKAL1</i>  | rs7756992  | -62.620                              | 688.054  | 0.928   | -0.108                              | 0.332 | 0.746   | 0.016                     | 0.355 | 0.965   |
| <i>MHC</i>     | rs601945   | -145.278                             | 922.912  | 0.875   | -0.069                              | 0.443 | 0.876   | -0.186                    | 0.474 | 0.694   |
| <i>LRFN2</i>   | rs34298980 | -722.163                             | 657.532  | 0.273   | 0.357                               | 0.318 | 0.263   | 0.528                     | 0.340 | 0.121   |
| <i>VEGFA</i>   | rs6458354  | 661.536                              | 696.543  | 0.343   | -0.278                              | 0.336 | 0.408   | -0.114                    | 0.360 | 0.752   |
| <i>TFAP2B</i>  | rs3798519  | -1571.862                            | 803.248  | 0.051   | 0.003                               | 0.387 | 0.994   | -0.230                    | 0.414 | 0.579   |
| <i>BEND3</i>   | rs4946812  | -83.848                              | 698.908  | 0.905   | 0.379                               | 0.337 | 0.260   | 0.298                     | 0.359 | 0.407   |
| <i>CENPW</i>   | rs11759026 | -871.539                             | 754.374  | 0.248   | -0.191                              | 0.362 | 0.599   | -0.296                    | 0.388 | 0.446   |
| <i>SOGA3</i>   | rs2800733  | 582.403                              | 694.727  | 0.402   | -0.588                              | 0.335 | 0.080   | -0.684                    | 0.358 | 0.057   |
| <i>SLC35D3</i> | rs9494624  | 396.328                              | 702.150  | 0.573   | -0.242                              | 0.339 | 0.475   | -0.087                    | 0.363 | 0.811   |
| <i>MIR3668</i> | rs2982521  | 236.720                              | 640.221  | 0.712   | 0.175                               | 0.310 | 0.572   | 0.050                     | 0.332 | 0.880   |
| <i>SLC22A3</i> | rs474513   | -256.473                             | 623.323  | 0.681   | 0.055                               | 0.300 | 0.854   | 0.086                     | 0.321 | 0.788   |
| <i>QKI</i>     | rs4709746  | 153.467                              | 899.541  | 0.865   | -0.278                              | 0.432 | 0.520   | -0.337                    | 0.463 | 0.468   |
| <i>DGKB</i>    | rs10228066 | -221.020                             | 622.020  | 0.722   | 0.136                               | 0.302 | 0.653   | -0.010                    | 0.323 | 0.974   |
| <i>IGF2BP3</i> | rs4279506  | -200.300                             | 623.125  | 0.748   | -0.141                              | 0.300 | 0.638   | -0.058                    | 0.322 | 0.857   |

| Locus    | Variant    | Fasting Leptin (adj BMI) -V2 (pg/ml) |          |         | Matsuda Sensitivity Index (adj BMI) |       |         | Matsuda Sensitivity Index |       |         |
|----------|------------|--------------------------------------|----------|---------|-------------------------------------|-------|---------|---------------------------|-------|---------|
|          |            | beta                                 | SE       | p-value | beta                                | SE    | p-value | beta                      | SE    | p-value |
| JAZF1    | rs1708302  | -308.304                             | 605.708  | 0.611   | 0.356                               | 0.292 | 0.222   | 0.434                     | 0.313 | 0.165   |
| CRHR2    | rs917195   | 168.628                              | 725.094  | 0.816   | -0.499                              | 0.349 | 0.154   | -0.778                    | 0.372 | 0.037   |
| GCK      | rs878521   | -167.625                             | 704.767  | 0.812   | -0.399                              | 0.340 | 0.241   | -0.375                    | 0.364 | 0.304   |
| FBXL13   | rs11496066 | -1585.597                            | 810.239  | 0.051   | 0.639                               | 0.389 | 0.101   | 0.592                     | 0.417 | 0.157   |
| RELN     | rs39328    | -823.171                             | 632.698  | 0.194   | -0.311                              | 0.305 | 0.310   | -0.349                    | 0.327 | 0.287   |
| CTTNBP2  | rs6976111  | -796.026                             | 678.548  | 0.241   | -0.181                              | 0.328 | 0.580   | -0.045                    | 0.351 | 0.897   |
| KLF14    | rs1562396  | -126.734                             | 681.204  | 0.852   | -0.227                              | 0.329 | 0.489   | -0.248                    | 0.352 | 0.482   |
| AOC1     | rs62492368 | 585.268                              | 664.265  | 0.379   | 0.182                               | 0.320 | 0.570   | 0.232                     | 0.343 | 0.500   |
| MNX1     | rs6459733  | 387.692                              | 618.364  | 0.531   | -0.217                              | 0.299 | 0.468   | -0.284                    | 0.320 | 0.374   |
| PPP1R3B  | rs4841132  | 790.089                              | 1183.043 | 0.505   | -0.338                              | 0.582 | 0.561   | -0.026                    | 0.623 | 0.967   |
| MSRA     | rs17689007 | 134.489                              | 595.136  | 0.821   | 0.690                               | 0.285 | 0.016   | 0.732                     | 0.306 | 0.017   |
| XKR6     | rs57327348 | -722.381                             | 849.400  | 0.395   | -0.197                              | 0.409 | 0.629   | -0.188                    | 0.437 | 0.668   |
| LPL      | rs10096633 | -68.291                              | 909.485  | 0.940   | -0.410                              | 0.437 | 0.348   | -0.397                    | 0.468 | 0.397   |
| PURG     | rs10954772 | -123.557                             | 660.486  | 0.852   | -0.227                              | 0.321 | 0.480   | -0.440                    | 0.343 | 0.201   |
| ANK1     | rs13262861 | 182.333                              | 763.456  | 0.811   | 0.224                               | 0.370 | 0.545   | 0.142                     | 0.396 | 0.720   |
| TP53INP1 | rs10097617 | -25.758                              | 622.847  | 0.967   | 0.029                               | 0.299 | 0.924   | -0.066                    | 0.321 | 0.837   |
| TRHR     | rs12680028 | 183.834                              | 618.440  | 0.766   | 0.018                               | 0.297 | 0.951   | -0.092                    | 0.318 | 0.771   |
| SLC30A8  | rs3802177  | -190.275                             | 678.414  | 0.779   | 0.546                               | 0.329 | 0.098   | 0.683                     | 0.352 | 0.053   |
| CASC11   | rs17772814 | -2009.805                            | 1156.989 | 0.083   | 0.490                               | 0.554 | 0.377   | 0.590                     | 0.594 | 0.321   |
| PVT1     | rs1561927  | 443.505                              | 676.145  | 0.512   | -0.137                              | 0.326 | 0.674   | -0.091                    | 0.349 | 0.795   |
| BOP1     | rs4977213  | -336.534                             | 616.429  | 0.585   | 0.759                               | 0.295 | 0.010   | 0.879                     | 0.315 | 0.005   |
| GLIS3    | rs10974438 | -443.617                             | 646.945  | 0.493   | 0.351                               | 0.311 | 0.261   | 0.317                     | 0.334 | 0.342   |
| HAUS6    | rs7022807  | 326.011                              | 631.314  | 0.606   | 0.316                               | 0.305 | 0.301   | 0.284                     | 0.327 | 0.386   |
| FOCAD    | rs7867635  | 181.463                              | 633.235  | 0.775   | -0.388                              | 0.304 | 0.203   | -0.453                    | 0.325 | 0.165   |
| CDKN2A/B | rs10811660 | -1472.322                            | 844.295  | 0.082   | 0.320                               | 0.407 | 0.432   | 0.287                     | 0.437 | 0.511   |
| LINGO2   | rs1412234  | -441.683                             | 664.218  | 0.506   | 0.307                               | 0.319 | 0.336   | 0.277                     | 0.342 | 0.418   |
| UBAP2    | rs12001437 | 1155.896                             | 617.036  | 0.062   | -0.112                              | 0.299 | 0.708   | -0.214                    | 0.320 | 0.503   |
| MTND2P8  | rs11137820 | 705.992                              | 611.960  | 0.249   | 0.717                               | 0.292 | 0.014   | 0.719                     | 0.314 | 0.022   |
| TLE4     | rs17791513 | 172.478                              | 1329.793 | 0.897   | -0.850                              | 0.643 | 0.187   | -1.099                    | 0.688 | 0.111   |
| TLE1     | rs2796441  | 78.714                               | 599.763  | 0.896   | -0.115                              | 0.289 | 0.690   | -0.055                    | 0.310 | 0.860   |

| Locus                | Variant    | Fasting Leptin (adj BMI) -V2 (pg/ml) |         |         | Matsuda Sensitivity Index (adj BMI) |       |         | Matsuda Sensitivity Index |       |         |
|----------------------|------------|--------------------------------------|---------|---------|-------------------------------------|-------|---------|---------------------------|-------|---------|
|                      |            | beta                                 | SE      | p-value | beta                                | SE    | p-value | beta                      | SE    | p-value |
| <i>ZNF169</i>        | rs55653563 | -339.105                             | 691.070 | 0.624   | -0.062                              | 0.332 | 0.852   | -0.193                    | 0.355 | 0.587   |
| <i>ABO</i>           | rs505922   | -1458.218                            | 631.572 | 0.021   | 0.376                               | 0.305 | 0.218   | 0.458                     | 0.327 | 0.161   |
| <i>GPSM1</i>         | rs28505901 | 88.870                               | 784.567 | 0.910   | -0.061                              | 0.379 | 0.871   | 0.028                     | 0.406 | 0.944   |
| <i>CDC123/CAMK1D</i> | rs11257655 | -441.402                             | 772.697 | 0.568   | 0.109                               | 0.374 | 0.771   | -0.135                    | 0.399 | 0.736   |
| <i>HKDC1</i>         | rs4746822  | 437.958                              | 639.769 | 0.494   | 0.036                               | 0.309 | 0.908   | -0.166                    | 0.331 | 0.615   |
| <i>NEUROG3</i>       | rs2642588  | -49.312                              | 668.808 | 0.941   | -0.388                              | 0.322 | 0.228   | -0.498                    | 0.344 | 0.149   |
| <i>ZMIZ1</i>         | rs703972   | 720.381                              | 643.215 | 0.263   | -0.223                              | 0.310 | 0.473   | -0.241                    | 0.332 | 0.468   |
| <i>PTEN</i>          | rs11202627 | -379.973                             | 863.754 | 0.660   | -0.782                              | 0.414 | 0.059   | -0.738                    | 0.444 | 0.097   |
| <i>HHEX/IDE</i>      | rs10882101 | 1348.134                             | 619.542 | 0.030   | -0.151                              | 0.298 | 0.612   | -0.202                    | 0.319 | 0.528   |
| <i>TCF7L2</i>        | rs7903146  | -226.600                             | 645.033 | 0.725   | -0.272                              | 0.310 | 0.380   | -0.243                    | 0.332 | 0.466   |
| <i>WDR11</i>         | rs72631105 | -733.969                             | 819.899 | 0.371   | 0.724                               | 0.394 | 0.066   | 0.685                     | 0.422 | 0.105   |
| <i>PLEKHA1</i>       | rs2280141  | 492.715                              | 624.034 | 0.430   | 0.019                               | 0.301 | 0.950   | -0.082                    | 0.323 | 0.800   |
| <i>INS/IGF2</i>      | rs4929965  | 490.022                              | 630.671 | 0.437   | 0.117                               | 0.305 | 0.701   | -0.078                    | 0.326 | 0.810   |
| <i>KCNQ1</i>         | rs2237895  | -254.130                             | 597.841 | 0.671   | -0.171                              | 0.287 | 0.552   | -0.107                    | 0.308 | 0.727   |
| <i>KCNJ11</i>        | rs5213     | -282.635                             | 671.775 | 0.674   | 0.226                               | 0.325 | 0.488   | 0.211                     | 0.348 | 0.546   |
| <i>METTL15</i>       | rs4923543  | -289.928                             | 676.465 | 0.668   | -0.039                              | 0.326 | 0.904   | 0.110                     | 0.349 | 0.752   |
| <i>PDHX</i>          | rs2767036  | -609.598                             | 672.917 | 0.365   | 0.134                               | 0.325 | 0.679   | 0.235                     | 0.348 | 0.499   |
| <i>HSD17B12</i>      | rs1061810  | 516.860                              | 688.069 | 0.453   | 0.214                               | 0.332 | 0.520   | 0.244                     | 0.356 | 0.494   |
| <i>CRY2</i>          | rs7115753  | -646.717                             | 631.309 | 0.306   | -0.165                              | 0.304 | 0.587   | -0.198                    | 0.325 | 0.543   |
| <i>CELF1</i>         | rs7124681  | -1165.021                            | 598.526 | 0.052   | -0.144                              | 0.290 | 0.620   | -0.103                    | 0.310 | 0.741   |
| <i>MAP3K11</i>       | rs1783541  | -622.829                             | 819.474 | 0.448   | 0.012                               | 0.397 | 0.975   | -0.061                    | 0.425 | 0.886   |
| <i>CENTD2/ARAP1</i>  | rs77464186 | 114.760                              | 877.034 | 0.896   | -0.127                              | 0.422 | 0.764   | -0.198                    | 0.452 | 0.662   |
| <i>MTNR1B</i>        | rs10830963 | -74.991                              | 691.194 | 0.914   | -0.360                              | 0.333 | 0.280   | -0.585                    | 0.355 | 0.100   |
| <i>ETS1</i>          | rs67232546 | -887.272                             | 744.130 | 0.234   | 0.226                               | 0.358 | 0.527   | 0.377                     | 0.380 | 0.321   |
| <i>CDKN1B</i>        | rs2066827  | -1474.985                            | 955.986 | 0.123   | 0.172                               | 0.460 | 0.709   | 0.387                     | 0.492 | 0.432   |
| <i>ITPR2</i>         | rs718314   | 813.173                              | 711.687 | 0.254   | 0.075                               | 0.342 | 0.826   | 0.245                     | 0.366 | 0.503   |
| <i>KLHDC5</i>        | rs10842994 | 440.324                              | 752.415 | 0.559   | -0.181                              | 0.361 | 0.617   | -0.148                    | 0.387 | 0.703   |
| <i>HMGA2</i>         | rs2258238  | -85.196                              | 975.032 | 0.930   | 0.495                               | 0.467 | 0.290   | 0.632                     | 0.499 | 0.206   |
| <i>TSPAN8/LGR5</i>   | rs1796330  | 1024.380                             | 629.476 | 0.104   | -0.025                              | 0.304 | 0.935   | -0.053                    | 0.325 | 0.871   |
| <i>USP44</i>         | rs2197973  | -597.132                             | 605.503 | 0.324   | -0.032                              | 0.293 | 0.913   | -0.241                    | 0.313 | 0.441   |

| Locus           | Variant    | Fasting Leptin (adj BMI) -V2 (pg/ml) |          |         | Matsuda Sensitivity Index (adj BMI) |       |         | Matsuda Sensitivity Index |       |         |
|-----------------|------------|--------------------------------------|----------|---------|-------------------------------------|-------|---------|---------------------------|-------|---------|
|                 |            | beta                                 | SE       | p-value | beta                                | SE    | p-value | beta                      | SE    | p-value |
| <i>RMST</i>     | rs77864822 | 963.310                              | 1239.530 | 0.437   | -0.475                              | 0.602 | 0.430   | -0.539                    | 0.645 | 0.404   |
| <i>WSCD2</i>    | rs1426371  | 1452.208                             | 771.509  | 0.060   | -0.138                              | 0.372 | 0.711   | -0.174                    | 0.398 | 0.663   |
| <i>KSR2</i>     | rs34965774 | -925.819                             | 894.093  | 0.301   | 0.386                               | 0.430 | 0.369   | 0.262                     | 0.460 | 0.569   |
| <i>HNF1A</i>    | rs56348580 | -539.515                             | 673.759  | 0.424   | -0.182                              | 0.325 | 0.577   | -0.156                    | 0.349 | 0.654   |
| <i>MPHOSPH9</i> | rs4148856  | 285.282                              | 701.026  | 0.684   | -0.202                              | 0.338 | 0.551   | -0.451                    | 0.361 | 0.213   |
| <i>ZNF664</i>   | rs7978610  | -336.542                             | 632.269  | 0.595   | 0.180                               | 0.305 | 0.556   | 0.273                     | 0.327 | 0.403   |
| <i>FBRSL1</i>   | rs12811407 | -380.196                             | 672.667  | 0.572   | -0.082                              | 0.323 | 0.800   | -0.079                    | 0.346 | 0.820   |
| <i>RNF6</i>     | rs34584161 | 617.900                              | 698.242  | 0.377   | 0.040                               | 0.337 | 0.906   | 0.212                     | 0.361 | 0.558   |
| <i>HMGB1</i>    | rs11842871 | 527.883                              | 760.561  | 0.488   | -0.647                              | 0.367 | 0.079   | -0.539                    | 0.394 | 0.172   |
| <i>KL</i>       | rs576674   | 498.223                              | 767.056  | 0.516   | -0.115                              | 0.372 | 0.757   | -0.006                    | 0.398 | 0.989   |
| <i>DLEU1</i>    | rs963740   | -45.985                              | 684.129  | 0.946   | -0.545                              | 0.327 | 0.097   | -0.471                    | 0.351 | 0.180   |
| <i>PCDH17</i>   | rs9537803  | 984.791                              | 691.856  | 0.155   | -0.224                              | 0.334 | 0.504   | -0.190                    | 0.358 | 0.596   |
| <i>SRGAP2D</i>  | rs9563615  | -277.441                             | 699.660  | 0.692   | -0.276                              | 0.337 | 0.413   | -0.399                    | 0.361 | 0.270   |
| <i>SPRY2</i>    | rs1359790  | -1112.781                            | 682.619  | 0.104   | 0.436                               | 0.328 | 0.184   | 0.405                     | 0.351 | 0.250   |
| <i>IRS2</i>     | rs7987740  | 551.634                              | 643.516  | 0.392   | 0.225                               | 0.311 | 0.468   | 0.069                     | 0.333 | 0.835   |
| <i>SLC7A7</i>   | rs17122772 | -1973.297                            | 785.230  | 0.012   | 0.451                               | 0.381 | 0.237   | 0.633                     | 0.407 | 0.121   |
| <i>AKAP6</i>    | rs17522122 | -224.146                             | 612.453  | 0.715   | -0.098                              | 0.297 | 0.741   | -0.170                    | 0.318 | 0.594   |
| <i>CLEC14A</i>  | rs8017808  | 233.639                              | 682.489  | 0.732   | -0.011                              | 0.327 | 0.973   | 0.034                     | 0.351 | 0.923   |
| <i>NRXN3</i>    | rs17836088 | 338.867                              | 759.498  | 0.656   | 0.190                               | 0.365 | 0.602   | 0.171                     | 0.391 | 0.662   |
| <i>SMEK1</i>    | rs8010382  | 384.220                              | 652.615  | 0.556   | -0.469                              | 0.315 | 0.137   | -0.531                    | 0.337 | 0.116   |
| <i>MARK3</i>    | rs62007683 | 659.472                              | 638.846  | 0.302   | -0.220                              | 0.307 | 0.474   | -0.149                    | 0.328 | 0.650   |
| <i>RASGRP1</i>  | rs34715063 | -165.339                             | 957.419  | 0.863   | 0.230                               | 0.461 | 0.618   | 0.366                     | 0.494 | 0.458   |
| <i>LTK</i>      | rs11070332 | -38.421                              | 620.191  | 0.951   | 0.215                               | 0.300 | 0.474   | 0.454                     | 0.319 | 0.156   |
| <i>ONECUT1</i>  | rs2456530  | -383.626                             | 956.990  | 0.689   | -0.213                              | 0.463 | 0.646   | -0.255                    | 0.495 | 0.607   |
| <i>C2CD4A/B</i> | rs8037894  | 329.534                              | 611.640  | 0.590   | 0.001                               | 0.297 | 0.996   | -0.037                    | 0.317 | 0.907   |
| <i>USP3</i>     | rs7178762  | 990.935                              | 618.623  | 0.110   | -0.148                              | 0.297 | 0.619   | -0.039                    | 0.319 | 0.904   |
| <i>MAP2K5</i>   | rs4776970  | 159.795                              | 630.142  | 0.800   | 0.214                               | 0.304 | 0.482   | 0.245                     | 0.325 | 0.452   |
| <i>PTPN9</i>    | rs13737    | -1063.210                            | 695.182  | 0.127   | 0.172                               | 0.336 | 0.609   | 0.078                     | 0.360 | 0.828   |
| <i>HMG20A</i>   | rs1005752  | -705.054                             | 670.944  | 0.294   | 0.103                               | 0.325 | 0.752   | 0.064                     | 0.348 | 0.854   |
| <i>AP3S2</i>    | rs4932265  | 443.099                              | 706.648  | 0.531   | -0.106                              | 0.341 | 0.756   | -0.020                    | 0.365 | 0.956   |



| Locus         | Variant    | Fasting Leptin (adj BMI) -V2 (pg/ml) |          |         | Matsuda Sensitivity Index (adj BMI) |       |         | Matsuda Sensitivity Index |       |         |
|---------------|------------|--------------------------------------|----------|---------|-------------------------------------|-------|---------|---------------------------|-------|---------|
|               |            | beta                                 | SE       | p-value | beta                                | SE    | p-value | beta                      | SE    | p-value |
| <i>PRC1</i>   | rs12910825 | -211.488                             | 627.437  | 0.736   | 0.256                               | 0.305 | 0.400   | 0.144                     | 0.326 | 0.658   |
| <i>ITFG3</i>  | rs6600191  | -923.562                             | 794.900  | 0.246   | -0.681                              | 0.381 | 0.075   | -0.703                    | 0.409 | 0.086   |
| <i>CLUAP1</i> | rs3751837  | -247.003                             | 784.267  | 0.753   | -0.277                              | 0.379 | 0.465   | -0.390                    | 0.406 | 0.337   |
| <i>ATP2A1</i> | rs8046545  | -1337.309                            | 658.045  | 0.043   | 0.285                               | 0.317 | 0.370   | 0.142                     | 0.339 | 0.676   |
| <i>FAM57B</i> | rs11642430 | -13.631                              | 645.970  | 0.983   | -0.283                              | 0.310 | 0.361   | -0.340                    | 0.332 | 0.306   |
| <i>FTO</i>    | rs1421085  | 65.750                               | 609.230  | 0.914   | -0.366                              | 0.292 | 0.210   | -0.538                    | 0.312 | 0.085   |
| <i>NFAT5</i>  | rs862320   | -505.034                             | 619.999  | 0.416   | 0.637                               | 0.300 | 0.034   | 0.535                     | 0.321 | 0.097   |
| <i>BCAR1</i>  | rs72802342 | -417.586                             | 1204.495 | 0.729   | 1.014                               | 0.574 | 0.078   | 0.766                     | 0.616 | 0.214   |
| <i>CMIP</i>   | rs2925979  | 405.988                              | 666.520  | 0.543   | -0.292                              | 0.320 | 0.362   | -0.158                    | 0.343 | 0.645   |
| <i>SPG7</i>   | rs12920022 | -426.304                             | 902.481  | 0.637   | -0.780                              | 0.436 | 0.074   | -0.793                    | 0.467 | 0.090   |
| <i>ZZEF1</i>  | rs1377807  | -46.858                              | 664.192  | 0.944   | 0.212                               | 0.319 | 0.506   | 0.175                     | 0.342 | 0.610   |
| <i>ATP1B2</i> | rs1641523  | 1016.352                             | 640.076  | 0.113   | -0.253                              | 0.308 | 0.411   | -0.319                    | 0.330 | 0.335   |
| <i>GLP2R</i>  | rs7222481  | 524.441                              | 674.736  | 0.437   | -0.545                              | 0.324 | 0.093   | -0.702                    | 0.347 | 0.043   |
| <i>RAI1</i>   | rs4925109  | -673.802                             | 620.799  | 0.278   | -0.198                              | 0.300 | 0.509   | 0.037                     | 0.320 | 0.908   |
| <i>NF1</i>    | rs71372253 | -306.867                             | 1169.555 | 0.793   | -1.125                              | 0.562 | 0.046   | -1.179                    | 0.603 | 0.051   |
| <i>HNF1B</i>  | rs10908278 | -104.170                             | 617.274  | 0.866   | 0.764                               | 0.294 | 0.010   | 0.743                     | 0.315 | 0.019   |
| <i>MLX</i>    | rs34855406 | -121.748                             | 700.605  | 0.862   | -0.019                              | 0.337 | 0.954   | 0.164                     | 0.360 | 0.649   |
| <i>TTL6</i>   | rs35895680 | 356.218                              | 664.817  | 0.592   | 0.510                               | 0.320 | 0.111   | 0.335                     | 0.343 | 0.329   |
| <i>ACE</i>    | rs60276348 | -353.667                             | 784.768  | 0.652   | -0.414                              | 0.377 | 0.272   | -0.479                    | 0.403 | 0.235   |
| <i>BPTF</i>   | rs61676547 | -1079.739                            | 732.289  | 0.141   | 0.609                               | 0.351 | 0.084   | 0.764                     | 0.376 | 0.042   |
| <i>LAMA1</i>  | rs7240767  | -1001.922                            | 613.873  | 0.103   | 0.132                               | 0.297 | 0.655   | 0.076                     | 0.318 | 0.810   |
| <i>COMMD9</i> | rs62080313 | -1132.798                            | 909.358  | 0.213   | 0.127                               | 0.443 | 0.775   | 0.037                     | 0.475 | 0.938   |
| <i>TCF4</i>   | rs72926932 | -329.036                             | 1156.463 | 0.776   | 0.736                               | 0.557 | 0.187   | 0.986                     | 0.596 | 0.099   |
| <i>WDR7</i>   | rs17684074 | 924.565                              | 735.043  | 0.209   | -0.071                              | 0.355 | 0.842   | 0.077                     | 0.380 | 0.839   |
| <i>GRP</i>    | rs9957145  | 550.450                              | 874.681  | 0.529   | -0.123                              | 0.421 | 0.769   | -0.287                    | 0.451 | 0.524   |
| <i>MC4R</i>   | rs523288   | -297.009                             | 720.067  | 0.680   | 0.241                               | 0.346 | 0.486   | -0.158                    | 0.366 | 0.667   |
| <i>BCL2A</i>  | rs12454712 | -54.791                              | 738.826  | 0.941   | -0.536                              | 0.354 | 0.130   | -0.346                    | 0.378 | 0.360   |
| <i>UHRF1</i>  | rs7249758  | 842.974                              | 765.329  | 0.271   | 0.197                               | 0.368 | 0.593   | 0.404                     | 0.393 | 0.304   |
| <i>INSR</i>   | rs75253922 | -480.058                             | 786.840  | 0.542   | 0.462                               | 0.378 | 0.223   | 0.308                     | 0.405 | 0.447   |
| <i>MAP2K7</i> | rs4804833  | 27.787                               | 614.760  | 0.964   | -0.230                              | 0.299 | 0.443   | -0.319                    | 0.320 | 0.319   |

| Locus              | Variant     | Fasting Leptin (adj BMI) -V2 (pg/ml) |          |         | Matsuda Sensitivity Index (adj BMI) |       |         | Matsuda Sensitivity Index |       |         |
|--------------------|-------------|--------------------------------------|----------|---------|-------------------------------------|-------|---------|---------------------------|-------|---------|
|                    |             | beta                                 | SE       | p-value | beta                                | SE    | p-value | beta                      | SE    | p-value |
| <i>FARSA</i>       | rs3111316   | -85.400                              | 625.009  | 0.891   | 0.145                               | 0.302 | 0.631   | 0.275                     | 0.323 | 0.395   |
| <i>TM6SF2</i>      | rs8107974   | -44.154                              | 1214.137 | 0.971   | 1.028                               | 0.581 | 0.078   | 0.917                     | 0.624 | 0.142   |
| <i>PEPD</i>        | rs10406327  | 425.603                              | 603.587  | 0.481   | -0.293                              | 0.290 | 0.312   | -0.367                    | 0.311 | 0.238   |
| <i>TOMM40/APOE</i> | rs429358    | 979.000                              | 950.479  | 0.303   | -0.272                              | 0.458 | 0.553   | -0.295                    | 0.491 | 0.548   |
| <i>GIPR</i>        | rs10406431  | 67.328                               | 622.505  | 0.914   | 0.264                               | 0.301 | 0.381   | 0.109                     | 0.322 | 0.735   |
| <i>ZC3H4</i>       | rs3810291   | 293.000                              | 668.661  | 0.661   | 0.174                               | 0.323 | 0.590   | 0.134                     | 0.346 | 0.699   |
| <i>NKX2.2</i>      | rs13041756  | -420.461                             | 1047.975 | 0.688   | -0.022                              | 0.504 | 0.965   | 0.150                     | 0.540 | 0.782   |
| <i>RALY</i>        | rs2268078   | 372.874                              | 658.469  | 0.571   | -0.068                              | 0.319 | 0.830   | -0.145                    | 0.342 | 0.672   |
| <i>EYA2</i>        | rs6063048   | -989.244                             | 724.715  | 0.173   | -0.054                              | 0.349 | 0.877   | -0.051                    | 0.374 | 0.892   |
| <i>CEBPB</i>       | rs11699802  | -301.588                             | 649.429  | 0.643   | 0.009                               | 0.313 | 0.977   | -0.039                    | 0.336 | 0.908   |
| <i>TSHZ2</i>       | rs34454109  | 678.106                              | 750.789  | 0.367   | 0.104                               | 0.363 | 0.775   | -0.010                    | 0.389 | 0.979   |
| <i>GNAS</i>        | rs6070625   | 62.645                               | 611.061  | 0.918   | 0.254                               | 0.295 | 0.389   | 0.376                     | 0.315 | 0.234   |
| <i>TCEA2</i>       | rs59944054  | 1348.072                             | 730.347  | 0.065   | 0.148                               | 0.358 | 0.679   | 0.292                     | 0.382 | 0.445   |
| <i>MTMR3/ASCC2</i> | rs6518681   | 449.870                              | 1183.613 | 0.704   | 0.331                               | 0.568 | 0.560   | 0.423                     | 0.606 | 0.486   |
| <i>YWHAH</i>       | rs117001013 | -1351.538                            | 1317.396 | 0.305   | 0.663                               | 0.629 | 0.293   | 1.238                     | 0.670 | 0.065   |
| <i>EP300</i>       | rs5758223   | -354.850                             | 696.770  | 0.611   | 0.616                               | 0.334 | 0.065   | 0.584                     | 0.358 | 0.103   |
| <i>PNPLA3</i>      | rs738408    | -495.792                             | 692.798  | 0.475   | 0.021                               | 0.334 | 0.949   | 0.154                     | 0.358 | 0.666   |
| <i>PIM3</i>        | rs1801645   | 1228.002                             | 801.028  | 0.126   | -0.128                              | 0.388 | 0.743   | -0.190                    | 0.416 | 0.647   |

| Locus               | Variant     | NEFA - V2 (nmol/l) |       |         | 1-hour C-Peptide (pg/ml) |         |         | 1-hour Glucose (mmol/l) |       |         |
|---------------------|-------------|--------------------|-------|---------|--------------------------|---------|---------|-------------------------|-------|---------|
|                     |             | beta               | SE    | p-value | beta                     | SE      | p-value | beta                    | SE    | p-value |
| <i>MACF1</i>        | rs3768321   | -0.008             | 0.007 | 0.270   | -37.228                  | 109.367 | 0.734   | -0.033                  | 0.116 | 0.774   |
| <i>FAF1</i>         | rs58432198  | 0.001              | 0.009 | 0.936   | -197.902                 | 141.997 | 0.164   | 0.226                   | 0.148 | 0.127   |
| <i>PATJ</i>         | rs12140153  | 0.003              | 0.010 | 0.777   | -56.747                  | 156.825 | 0.718   | 0.057                   | 0.169 | 0.736   |
| <i>PTGFRN</i>       | rs1127215   | -0.004             | 0.006 | 0.528   | -2.325                   | 88.868  | 0.979   | -0.006                  | 0.094 | 0.948   |
| <i>NOTCH2</i>       | rs1493694   | 0.014              | 0.010 | 0.155   | -228.542                 | 153.589 | 0.137   | 0.003                   | 0.162 | 0.987   |
| <i>SEC16B</i>       | rs539515    | -0.011             | 0.008 | 0.146   | -47.518                  | 116.691 | 0.684   | -0.185                  | 0.123 | 0.133   |
| <i>DSTYK</i>        | rs12048743  | 0.000              | 0.006 | 0.982   | -67.013                  | 91.997  | 0.467   | 0.030                   | 0.096 | 0.751   |
| <i>SRGAP2</i>       | rs9430095   | 0.004              | 0.006 | 0.499   | 83.525                   | 88.347  | 0.345   | 0.053                   | 0.093 | 0.569   |
| <i>PROX1</i>        | rs340874    | -0.010             | 0.006 | 0.073   | -135.096                 | 89.972  | 0.134   | 0.054                   | 0.095 | 0.565   |
| <i>LYPLAL1</i>      | rs2820446   | -0.007             | 0.007 | 0.265   | -62.241                  | 100.843 | 0.537   | 0.130                   | 0.106 | 0.220   |
| <i>ABCB10</i>       | rs348330    | 0.005              | 0.006 | 0.390   | 81.420                   | 93.895  | 0.386   | -0.080                  | 0.098 | 0.414   |
| <i>GNG4</i>         | rs291367    | 0.001              | 0.006 | 0.874   | -91.246                  | 94.266  | 0.333   | 0.004                   | 0.099 | 0.967   |
| <i>FAM49A</i>       | rs11680058  | 0.004              | 0.009 | 0.680   | 35.756                   | 132.159 | 0.787   | 0.060                   | 0.139 | 0.664   |
| <i>DTNB</i>         | rs17802463  | 0.001              | 0.006 | 0.896   | 115.149                  | 99.243  | 0.246   | -0.061                  | 0.104 | 0.558   |
| <i>GCKR</i>         | rs1260326   | -0.012             | 0.006 | 0.035   | -43.835                  | 87.858  | 0.618   | -0.049                  | 0.093 | 0.602   |
| <i>THADA</i>        | rs80147536  | -0.006             | 0.009 | 0.504   | -51.344                  | 142.486 | 0.719   | 0.194                   | 0.148 | 0.192   |
| <i>BNIP1</i>        | rs6545714   | -0.003             | 0.006 | 0.592   | 115.471                  | 92.040  | 0.210   | -0.060                  | 0.097 | 0.534   |
| <i>BCL11A</i>       | rs243024    | 0.000              | 0.006 | 0.935   | 32.306                   | 89.808  | 0.719   | -0.168                  | 0.094 | 0.073   |
| <i>CEP68</i>        | rs2249105   | 0.010              | 0.006 | 0.090   | 175.556                  | 92.841  | 0.059   | -0.048                  | 0.097 | 0.623   |
| <i>GLI2</i>         | rs11688682  | 0.006              | 0.007 | 0.422   | 84.865                   | 110.199 | 0.442   | -0.090                  | 0.115 | 0.432   |
| <i>PABPC1P2</i>     | rs35999103  | 0.002              | 0.007 | 0.837   | 35.357                   | 115.237 | 0.759   | 0.011                   | 0.121 | 0.930   |
| <i>CYTIP</i>        | rs13426680  | 0.015              | 0.012 | 0.206   | 111.459                  | 179.816 | 0.536   | 0.517                   | 0.188 | 0.006   |
| <i>RBMS1</i>        | rs3772071   | 0.005              | 0.006 | 0.426   | -14.866                  | 97.910  | 0.879   | 0.042                   | 0.103 | 0.684   |
| <i>GRB14/COBLL1</i> | rs10195252  | 0.008              | 0.006 | 0.226   | -43.723                  | 95.562  | 0.647   | 0.123                   | 0.101 | 0.223   |
| <i>G6PC2</i>        | rs1402837   | 0.004              | 0.007 | 0.518   | -69.260                  | 101.665 | 0.496   | -0.006                  | 0.108 | 0.956   |
| <i>CRYBA2</i>       | rs113414093 | 0.021              | 0.022 | 0.359   | 578.227                  | 351.737 | 0.101   | 0.302                   | 0.372 | 0.417   |
| <i>IRS1</i>         | rs2972144   | -0.002             | 0.006 | 0.796   | 148.077                  | 96.166  | 0.124   | 0.095                   | 0.101 | 0.351   |
| <i>PPARG</i>        | rs11709077  | -0.011             | 0.009 | 0.220   | 13.520                   | 143.817 | 0.925   | 0.178                   | 0.152 | 0.242   |

| Locus          | Variant    | NEFA - V2 (nmol/l) |       |         | 1-hour C-Peptide (pg/ml) |         |         | 1-hour Glucose (mmol/l) |       |         |
|----------------|------------|--------------------|-------|---------|--------------------------|---------|---------|-------------------------|-------|---------|
|                |            | beta               | SE    | p-value | beta                     | SE      | p-value | beta                    | SE    | p-value |
| <i>UBE2E2</i>  | rs35352848 | -0.002             | 0.007 | 0.788   | -57.870                  | 107.589 | 0.591   | 0.005                   | 0.114 | 0.963   |
| <i>KIF9</i>    | rs11926707 | 0.001              | 0.006 | 0.811   | -80.509                  | 93.650  | 0.390   | -0.108                  | 0.099 | 0.273   |
| <i>RBM6</i>    | rs4688760  | 0.008              | 0.006 | 0.205   | -17.323                  | 99.468  | 0.862   | 0.118                   | 0.104 | 0.258   |
| <i>RFT1</i>    | rs2581787  | 0.007              | 0.006 | 0.210   | -1.277                   | 89.603  | 0.989   | 0.070                   | 0.095 | 0.457   |
| <i>PSMD6</i>   | rs3774723  | -0.003             | 0.008 | 0.718   | -21.718                  | 123.132 | 0.860   | 0.141                   | 0.130 | 0.278   |
| <i>ADAMTS9</i> | rs9860730  | 0.005              | 0.006 | 0.373   | -118.354                 | 93.545  | 0.206   | 0.026                   | 0.098 | 0.791   |
| <i>SHQ1</i>    | rs13085136 | 0.003              | 0.015 | 0.841   | -57.511                  | 227.476 | 0.800   | -0.011                  | 0.241 | 0.962   |
| <i>ROBO2</i>   | rs2272163  | 0.002              | 0.006 | 0.670   | -103.731                 | 91.149  | 0.256   | 0.019                   | 0.095 | 0.842   |
| <i>ADCY5</i>   | rs11708067 | -0.001             | 0.007 | 0.919   | 83.791                   | 109.077 | 0.443   | -0.038                  | 0.115 | 0.740   |
| <i>SLC12A8</i> | rs649961   | -0.002             | 0.006 | 0.703   | 171.987                  | 89.222  | 0.054   | -0.105                  | 0.094 | 0.263   |
| <i>TMCC1</i>   | rs9828772  | -0.009             | 0.010 | 0.372   | -26.892                  | 163.570 | 0.869   | -0.050                  | 0.171 | 0.770   |
| <i>TSC22D2</i> | rs62271373 | -0.004             | 0.010 | 0.679   | -310.260                 | 160.835 | 0.054   | -0.060                  | 0.168 | 0.720   |
| <i>MBNL1</i>   | rs13065698 | -0.001             | 0.006 | 0.844   | 82.361                   | 92.811  | 0.375   | 0.113                   | 0.097 | 0.246   |
| <i>EGFEM1P</i> | rs7629630  | -0.022             | 0.008 | 0.006   | 38.242                   | 126.341 | 0.762   | -0.028                  | 0.133 | 0.835   |
| <i>SLC2A2</i>  | rs9873618  | 0.003              | 0.006 | 0.609   | -23.261                  | 98.985  | 0.814   | 0.119                   | 0.104 | 0.254   |
| <i>ABCC5</i>   | rs2872246  | 0.002              | 0.006 | 0.773   | 22.197                   | 86.537  | 0.798   | -0.033                  | 0.091 | 0.717   |
| <i>IGF2BP2</i> | rs6780171  | 0.000              | 0.006 | 0.947   | -195.320                 | 97.290  | 0.045   | 0.089                   | 0.102 | 0.385   |
| <i>ST6GAL1</i> | rs3887925  | 0.001              | 0.006 | 0.845   | -145.894                 | 89.552  | 0.104   | 0.014                   | 0.094 | 0.883   |
| <i>LPP</i>     | rs4686471  | -0.002             | 0.006 | 0.785   | 58.783                   | 92.902  | 0.527   | 0.064                   | 0.098 | 0.513   |
| <i>MAEA</i>    | rs56337234 | -0.004             | 0.006 | 0.494   | 53.914                   | 99.090  | 0.587   | -0.006                  | 0.104 | 0.954   |
| <i>HTT</i>     | rs362307   | -0.006             | 0.011 | 0.629   | 245.632                  | 178.170 | 0.169   | 0.051                   | 0.187 | 0.787   |
| <i>WFS1</i>    | rs10937721 | -0.003             | 0.006 | 0.605   | -40.153                  | 90.193  | 0.656   | 0.019                   | 0.095 | 0.844   |
| <i>LCORL</i>   | rs12640250 | -0.004             | 0.007 | 0.576   | 64.302                   | 104.009 | 0.537   | 0.001                   | 0.109 | 0.993   |
| <i>GNPDA2</i>  | rs10938398 | 0.007              | 0.006 | 0.233   | 105.766                  | 89.464  | 0.238   | 0.045                   | 0.094 | 0.631   |
| <i>USP46</i>   | rs2102278  | 0.004              | 0.006 | 0.564   | -87.638                  | 97.984  | 0.371   | 0.103                   | 0.103 | 0.317   |
| <i>SCD5</i>    | rs12642790 | 0.010              | 0.006 | 0.103   | -195.829                 | 94.836  | 0.039   | -0.065                  | 0.100 | 0.518   |
| <i>FAM13A</i>  | rs1903002  | -0.002             | 0.006 | 0.708   | 131.649                  | 91.409  | 0.150   | 0.071                   | 0.096 | 0.459   |
| <i>SMARCA1</i> | rs6821438  | -0.004             | 0.006 | 0.516   | 6.211                    | 91.853  | 0.946   | 0.049                   | 0.096 | 0.613   |
| <i>SLC9B1</i>  | rs1580278  | -0.009             | 0.006 | 0.135   | 41.609                   | 91.974  | 0.651   | 0.180                   | 0.097 | 0.063   |
| <i>PABPC4L</i> | rs1296328  | -0.005             | 0.006 | 0.423   | -33.619                  | 94.256  | 0.721   | -0.057                  | 0.099 | 0.564   |

| Locus          | Variant    | NEFA - V2 (nmol/l) |       |         | 1-hour C-Peptide (pg/ml) |         |         | 1-hour Glucose (mmol/l) |       |         |
|----------------|------------|--------------------|-------|---------|--------------------------|---------|---------|-------------------------|-------|---------|
|                |            | beta               | SE    | p-value | beta                     | SE      | p-value | beta                    | SE    | p-value |
| <i>TMEM154</i> | rs7669833  | -0.003             | 0.006 | 0.636   | -13.092                  | 97.056  | 0.893   | 0.088                   | 0.101 | 0.385   |
| <i>PDGFC</i>   | rs28819812 | -0.004             | 0.006 | 0.522   | 2.819                    | 95.710  | 0.977   | 0.208                   | 0.100 | 0.039   |
| <i>ACSL1</i>   | rs58730668 | 0.005              | 0.009 | 0.547   | -81.586                  | 132.182 | 0.537   | -0.248                  | 0.140 | 0.076   |
| <i>MRPS30</i>  | rs6884702  | 0.006              | 0.006 | 0.269   | 49.847                   | 91.264  | 0.585   | 0.139                   | 0.096 | 0.147   |
| <i>ITGA1</i>   | rs3811978  | -0.001             | 0.008 | 0.924   | -41.647                  | 122.286 | 0.734   | 0.015                   | 0.128 | 0.904   |
| <i>ARL15</i>   | rs702634   | 0.004              | 0.006 | 0.510   | -108.401                 | 97.896  | 0.269   | -0.061                  | 0.103 | 0.556   |
| <i>ANKRD55</i> | rs465002   | -0.006             | 0.006 | 0.374   | 173.927                  | 98.406  | 0.078   | 0.130                   | 0.103 | 0.209   |
| <i>PIK3R1</i>  | rs4976033  | 0.006              | 0.006 | 0.261   | 229.680                  | 87.157  | 0.009   | 0.091                   | 0.092 | 0.327   |
| <i>POC5</i>    | rs2307111  | -0.006             | 0.006 | 0.315   | -23.538                  | 88.175  | 0.790   | 0.058                   | 0.093 | 0.530   |
| <i>ZBED3</i>   | rs4457053  | 0.005              | 0.006 | 0.459   | -56.277                  | 97.611  | 0.564   | -0.054                  | 0.103 | 0.603   |
| <i>DMGDH</i>   | rs1316776  | -0.005             | 0.006 | 0.457   | -5.310                   | 95.379  | 0.956   | 0.038                   | 0.100 | 0.702   |
| <i>RASA1</i>   | rs7719891  | 0.000              | 0.006 | 0.961   | -121.252                 | 95.488  | 0.205   | 0.124                   | 0.101 | 0.218   |
| <i>PCSK1</i>   | rs13179048 | 0.000              | 0.006 | 0.945   | -7.785                   | 95.138  | 0.935   | 0.110                   | 0.100 | 0.274   |
| <i>PHF15</i>   | rs329122   | 0.002              | 0.006 | 0.711   | 19.537                   | 93.764  | 0.835   | 0.016                   | 0.099 | 0.869   |
| <i>EBF1</i>    | rs3934712  | 0.018              | 0.007 | 0.011   | -58.850                  | 107.992 | 0.586   | 0.121                   | 0.113 | 0.287   |
| <i>RREB1</i>   | rs9379084  | -0.002             | 0.009 | 0.817   | -21.744                  | 145.117 | 0.881   | -0.002                  | 0.154 | 0.988   |
| <i>CDKAL1</i>  | rs7756992  | 0.000              | 0.006 | 0.999   | 29.343                   | 100.012 | 0.769   | 0.281                   | 0.105 | 0.008   |
| <i>MHC</i>     | rs601945   | -0.008             | 0.009 | 0.331   | 331.909                  | 132.796 | 0.013   | 0.027                   | 0.140 | 0.847   |
| <i>LRFN2</i>   | rs34298980 | 0.006              | 0.006 | 0.364   | 66.483                   | 95.858  | 0.488   | 0.003                   | 0.100 | 0.978   |
| <i>VEGFA</i>   | rs6458354  | -0.002             | 0.007 | 0.719   | 70.688                   | 100.874 | 0.484   | 0.098                   | 0.106 | 0.357   |
| <i>TFAP2B</i>  | rs3798519  | 0.010              | 0.007 | 0.186   | -26.521                  | 115.759 | 0.819   | 0.145                   | 0.121 | 0.230   |
| <i>BEND3</i>   | rs4946812  | -0.001             | 0.007 | 0.827   | -296.174                 | 100.783 | 0.003   | 0.060                   | 0.107 | 0.571   |
| <i>CENPW</i>   | rs11759026 | -0.011             | 0.007 | 0.120   | 107.216                  | 109.734 | 0.329   | -0.167                  | 0.115 | 0.147   |
| <i>SOGA3</i>   | rs2800733  | 0.009              | 0.007 | 0.154   | -37.083                  | 101.123 | 0.714   | 0.040                   | 0.106 | 0.710   |
| <i>SLC35D3</i> | rs9494624  | 0.004              | 0.007 | 0.543   | -66.543                  | 102.028 | 0.515   | 0.087                   | 0.107 | 0.419   |
| <i>MIR3668</i> | rs2982521  | 0.001              | 0.006 | 0.849   | 32.320                   | 93.134  | 0.729   | -0.095                  | 0.098 | 0.331   |
| <i>SLC22A3</i> | rs474513   | 0.002              | 0.006 | 0.726   | 12.712                   | 90.355  | 0.888   | 0.000                   | 0.095 | 0.997   |
| <i>QKI</i>     | rs4709746  | 0.000              | 0.008 | 0.978   | 154.742                  | 130.248 | 0.235   | 0.066                   | 0.137 | 0.629   |
| <i>DGKB</i>    | rs10228066 | 0.004              | 0.006 | 0.445   | -75.213                  | 90.551  | 0.407   | 0.144                   | 0.095 | 0.128   |
| <i>IGF2BP3</i> | rs4279506  | 0.001              | 0.006 | 0.798   | 53.293                   | 90.507  | 0.556   | 0.071                   | 0.095 | 0.459   |

| Locus           | Variant    | NEFA - V2 (nmol/l) |       |         | 1-hour C-Peptide (pg/ml) |         |         | 1-hour Glucose (mmol/l) |       |         |
|-----------------|------------|--------------------|-------|---------|--------------------------|---------|---------|-------------------------|-------|---------|
|                 |            | beta               | SE    | p-value | beta                     | SE      | p-value | beta                    | SE    | p-value |
| <i>JAZF1</i>    | rs1708302  | 0.002              | 0.006 | 0.787   | -19.144                  | 88.084  | 0.828   | 0.011                   | 0.093 | 0.907   |
| <i>CRHR2</i>    | rs917195   | 0.008              | 0.007 | 0.264   | 53.121                   | 105.095 | 0.613   | 0.361                   | 0.110 | 0.001   |
| <i>GCK</i>      | rs878521   | 0.009              | 0.007 | 0.189   | -76.008                  | 102.510 | 0.459   | 0.073                   | 0.108 | 0.497   |
| <i>FBXL13</i>   | rs11496066 | -0.002             | 0.008 | 0.807   | -100.937                 | 117.791 | 0.392   | 0.140                   | 0.124 | 0.261   |
| <i>RELN</i>     | rs39328    | -0.005             | 0.006 | 0.392   | 69.936                   | 91.843  | 0.447   | -0.081                  | 0.097 | 0.404   |
| <i>CTTNBP2</i>  | rs6976111  | -0.005             | 0.006 | 0.413   | -145.032                 | 98.151  | 0.140   | 0.092                   | 0.103 | 0.373   |
| <i>KLF14</i>    | rs1562396  | -0.001             | 0.006 | 0.875   | 124.164                  | 98.827  | 0.210   | -0.066                  | 0.104 | 0.523   |
| <i>AOC1</i>     | rs62492368 | 0.006              | 0.006 | 0.312   | 181.923                  | 96.251  | 0.059   | 0.056                   | 0.102 | 0.583   |
| <i>MNX1</i>     | rs6459733  | 0.004              | 0.006 | 0.468   | 140.615                  | 89.832  | 0.118   | 0.004                   | 0.095 | 0.969   |
| <i>PPP1R3B</i>  | rs4841132  | -0.016             | 0.011 | 0.149   | 354.452                  | 170.697 | 0.038   | -0.214                  | 0.181 | 0.239   |
| <i>MSRA</i>     | rs17689007 | -0.002             | 0.006 | 0.684   | -35.815                  | 86.181  | 0.678   | -0.211                  | 0.090 | 0.020   |
| <i>XKR6</i>     | rs57327348 | -0.004             | 0.008 | 0.630   | -167.085                 | 122.981 | 0.175   | -0.084                  | 0.128 | 0.513   |
| <i>LPL</i>      | rs10096633 | 0.010              | 0.009 | 0.234   | 61.030                   | 131.631 | 0.643   | 0.221                   | 0.139 | 0.112   |
| <i>PURG</i>     | rs10954772 | 0.007              | 0.006 | 0.259   | 91.498                   | 96.055  | 0.341   | 0.166                   | 0.101 | 0.101   |
| <i>ANK1</i>     | rs13262861 | -0.014             | 0.007 | 0.045   | -27.226                  | 111.411 | 0.807   | -0.073                  | 0.117 | 0.535   |
| <i>TP53INP1</i> | rs10097617 | 0.001              | 0.006 | 0.928   | -45.958                  | 90.196  | 0.611   | -0.071                  | 0.095 | 0.457   |
| <i>TRHR</i>     | rs12680028 | 0.012              | 0.006 | 0.039   | -15.423                  | 89.339  | 0.863   | 0.142                   | 0.095 | 0.136   |
| <i>SLC30A8</i>  | rs3802177  | -0.005             | 0.006 | 0.472   | -54.741                  | 99.828  | 0.584   | 0.132                   | 0.104 | 0.202   |
| <i>CASC11</i>   | rs17772814 | -0.004             | 0.011 | 0.703   | 83.093                   | 166.646 | 0.618   | -0.235                  | 0.176 | 0.184   |
| <i>PVT1</i>     | rs1561927  | -0.002             | 0.006 | 0.814   | 20.555                   | 98.313  | 0.834   | 0.008                   | 0.104 | 0.939   |
| <i>BOP1</i>     | rs4977213  | 0.000              | 0.006 | 0.965   | -107.785                 | 89.123  | 0.227   | -0.215                  | 0.094 | 0.022   |
| <i>GLIS3</i>    | rs10974438 | 0.009              | 0.006 | 0.130   | -104.036                 | 93.692  | 0.267   | 0.007                   | 0.099 | 0.945   |
| <i>HAUS6</i>    | rs7022807  | 0.002              | 0.006 | 0.713   | -29.586                  | 91.684  | 0.747   | 0.133                   | 0.096 | 0.169   |
| <i>FOCAD</i>    | rs7867635  | 0.004              | 0.006 | 0.492   | 105.742                  | 91.800  | 0.250   | 0.115                   | 0.096 | 0.235   |
| <i>CDKN2A/B</i> | rs10811660 | -0.010             | 0.008 | 0.208   | -406.986                 | 121.764 | 0.001   | 0.001                   | 0.127 | 0.996   |
| <i>LINGO2</i>   | rs1412234  | -0.004             | 0.006 | 0.571   | 11.757                   | 96.497  | 0.903   | -0.069                  | 0.101 | 0.496   |
| <i>UBAP2</i>    | rs12001437 | -0.003             | 0.006 | 0.632   | 72.889                   | 89.817  | 0.417   | 0.020                   | 0.094 | 0.830   |
| <i>MTND2P8</i>  | rs11137820 | 0.006              | 0.006 | 0.329   | -95.827                  | 88.564  | 0.280   | -0.139                  | 0.093 | 0.137   |
| <i>TLE4</i>     | rs17791513 | 0.005              | 0.012 | 0.704   | -2.041                   | 192.994 | 0.992   | 0.037                   | 0.202 | 0.855   |
| <i>TLE1</i>     | rs2796441  | 0.006              | 0.006 | 0.314   | 142.168                  | 87.159  | 0.103   | 0.149                   | 0.092 | 0.103   |

| Locus                | Variant    | NEFA - V2 (nmol/l) |       |         | 1-hour C-Peptide (pg/ml) |         |         | 1-hour Glucose (mmol/l) |       |         |
|----------------------|------------|--------------------|-------|---------|--------------------------|---------|---------|-------------------------|-------|---------|
|                      |            | beta               | SE    | p-value | beta                     | SE      | p-value | beta                    | SE    | p-value |
| <i>ZNF169</i>        | rs55653563 | 0.004              | 0.006 | 0.562   | 178.973                  | 99.656  | 0.073   | 0.037                   | 0.105 | 0.722   |
| <i>ABO</i>           | rs505922   | 0.006              | 0.006 | 0.303   | -25.821                  | 92.060  | 0.779   | 0.009                   | 0.097 | 0.926   |
| <i>GPSM1</i>         | rs28505901 | -0.001             | 0.007 | 0.894   | 101.741                  | 113.987 | 0.372   | 0.101                   | 0.120 | 0.401   |
| <i>CDC123/CAMK1D</i> | rs11257655 | 0.001              | 0.007 | 0.945   | 77.856                   | 112.409 | 0.489   | 0.028                   | 0.118 | 0.810   |
| <i>HKDC1</i>         | rs4746822  | 0.007              | 0.006 | 0.219   | 113.668                  | 92.365  | 0.219   | 0.103                   | 0.097 | 0.289   |
| <i>NEUROG3</i>       | rs2642588  | 0.002              | 0.006 | 0.780   | 81.662                   | 97.051  | 0.400   | -0.032                  | 0.103 | 0.756   |
| <i>ZMIZ1</i>         | rs703972   | 0.000              | 0.006 | 0.944   | -39.800                  | 93.331  | 0.670   | 0.104                   | 0.098 | 0.290   |
| <i>PTEN</i>          | rs11202627 | -0.011             | 0.008 | 0.157   | -33.981                  | 125.187 | 0.786   | 0.018                   | 0.132 | 0.893   |
| <i>HHEX/IDE</i>      | rs10882101 | -0.004             | 0.006 | 0.515   | 107.052                  | 89.582  | 0.233   | 0.085                   | 0.095 | 0.369   |
| <i>TCF7L2</i>        | rs7903146  | -0.002             | 0.006 | 0.746   | -45.928                  | 93.487  | 0.623   | 0.119                   | 0.098 | 0.227   |
| <i>WDR11</i>         | rs72631105 | -0.001             | 0.008 | 0.875   | -110.699                 | 118.915 | 0.352   | -0.105                  | 0.125 | 0.400   |
| <i>PLEKHA1</i>       | rs2280141  | 0.012              | 0.006 | 0.043   | 123.928                  | 90.170  | 0.170   | 0.197                   | 0.095 | 0.038   |
| <i>INS/IGF2</i>      | rs4929965  | -0.003             | 0.006 | 0.641   | 87.886                   | 91.467  | 0.337   | -0.061                  | 0.096 | 0.527   |
| <i>KCNQ1</i>         | rs2237895  | 0.008              | 0.006 | 0.157   | -66.443                  | 86.675  | 0.444   | 0.176                   | 0.091 | 0.053   |
| <i>KCNJ11</i>        | rs5213     | 0.001              | 0.006 | 0.824   | 301.353                  | 96.762  | 0.002   | 0.111                   | 0.102 | 0.279   |
| <i>METTL15</i>       | rs4923543  | -0.004             | 0.006 | 0.505   | 17.122                   | 98.913  | 0.863   | -0.064                  | 0.103 | 0.532   |
| <i>PDHX</i>          | rs2767036  | -0.002             | 0.006 | 0.731   | 80.893                   | 97.723  | 0.408   | 0.094                   | 0.103 | 0.361   |
| <i>HSD17B12</i>      | rs1061810  | 0.007              | 0.006 | 0.280   | -55.481                  | 99.694  | 0.578   | 0.007                   | 0.105 | 0.951   |
| <i>CRY2</i>          | rs7115753  | 0.006              | 0.006 | 0.328   | -127.986                 | 91.069  | 0.160   | 0.140                   | 0.096 | 0.143   |
| <i>CELF1</i>         | rs7124681  | 0.003              | 0.006 | 0.596   | 70.236                   | 86.947  | 0.420   | 0.196                   | 0.091 | 0.032   |
| <i>MAP3K11</i>       | rs1783541  | -0.005             | 0.008 | 0.493   | -198.069                 | 120.237 | 0.100   | 0.003                   | 0.125 | 0.979   |
| <i>CENTD2/ARAP1</i>  | rs77464186 | 0.012              | 0.008 | 0.137   | 87.686                   | 127.217 | 0.491   | -0.007                  | 0.135 | 0.960   |
| <i>MTNR1B</i>        | rs10830963 | 0.002              | 0.006 | 0.752   | -81.552                  | 100.236 | 0.416   | 0.307                   | 0.104 | 0.003   |
| <i>ETS1</i>          | rs67232546 | 0.011              | 0.007 | 0.108   | -108.694                 | 107.004 | 0.310   | 0.119                   | 0.113 | 0.292   |
| <i>CDKN1B</i>        | rs2066827  | 0.005              | 0.009 | 0.554   | 46.835                   | 138.548 | 0.735   | 0.109                   | 0.146 | 0.454   |
| <i>ITPR2</i>         | rs718314   | -0.004             | 0.007 | 0.588   | 106.329                  | 102.950 | 0.302   | -0.078                  | 0.108 | 0.475   |
| <i>KLHDC5</i>        | rs10842994 | 0.010              | 0.007 | 0.170   | -180.254                 | 108.787 | 0.098   | 0.145                   | 0.115 | 0.208   |
| <i>HMGA2</i>         | rs2258238  | 0.004              | 0.009 | 0.624   | -68.178                  | 140.729 | 0.628   | 0.113                   | 0.148 | 0.448   |
| <i>TSPAN8/LGR5</i>   | rs1796330  | 0.003              | 0.006 | 0.665   | 117.681                  | 91.258  | 0.198   | -0.029                  | 0.096 | 0.766   |
| <i>USP44</i>         | rs2197973  | -0.002             | 0.006 | 0.705   | 40.680                   | 87.533  | 0.642   | -0.058                  | 0.092 | 0.533   |

| Locus           | Variant    | NEFA - V2 (nmol/l) |       |         | 1-hour C-Peptide (pg/ml) |         |         | 1-hour Glucose (mmol/l) |       |         |
|-----------------|------------|--------------------|-------|---------|--------------------------|---------|---------|-------------------------|-------|---------|
|                 |            | beta               | SE    | p-value | beta                     | SE      | p-value | beta                    | SE    | p-value |
| <i>RMST</i>     | rs77864822 | -0.002             | 0.012 | 0.880   | -212.855                 | 181.686 | 0.242   | 0.210                   | 0.190 | 0.270   |
| <i>WSCD2</i>    | rs1426371  | 0.002              | 0.007 | 0.749   | -119.829                 | 111.956 | 0.285   | -0.149                  | 0.118 | 0.208   |
| <i>KSR2</i>     | rs34965774 | -0.005             | 0.008 | 0.579   | -297.442                 | 129.072 | 0.022   | 0.129                   | 0.136 | 0.341   |
| <i>HNF1A</i>    | rs56348580 | 0.004              | 0.006 | 0.488   | 47.397                   | 98.292  | 0.630   | 0.176                   | 0.103 | 0.087   |
| <i>MPHOSPH9</i> | rs4148856  | 0.003              | 0.007 | 0.690   | 74.622                   | 101.732 | 0.464   | 0.154                   | 0.107 | 0.149   |
| <i>ZNF664</i>   | rs7978610  | 0.015              | 0.006 | 0.011   | -238.741                 | 91.472  | 0.009   | 0.132                   | 0.097 | 0.173   |
| <i>FBRSL1</i>   | rs12811407 | -0.007             | 0.006 | 0.252   | 69.470                   | 97.428  | 0.476   | 0.006                   | 0.102 | 0.952   |
| <i>RNF6</i>     | rs34584161 | -0.008             | 0.007 | 0.206   | 258.394                  | 100.406 | 0.010   | 0.103                   | 0.107 | 0.334   |
| <i>HMGB1</i>    | rs11842871 | 0.016              | 0.007 | 0.025   | -68.234                  | 111.517 | 0.541   | 0.093                   | 0.116 | 0.421   |
| <i>KL</i>       | rs576674   | 0.002              | 0.007 | 0.775   | -153.079                 | 111.785 | 0.171   | -0.125                  | 0.117 | 0.288   |
| <i>DLEU1</i>    | rs963740   | 0.002              | 0.006 | 0.793   | -96.946                  | 98.917  | 0.327   | 0.082                   | 0.104 | 0.431   |
| <i>PCDH17</i>   | rs9537803  | -0.006             | 0.006 | 0.344   | 102.592                  | 100.329 | 0.307   | -0.033                  | 0.106 | 0.756   |
| <i>SRGAP2D</i>  | rs9563615  | 0.010              | 0.007 | 0.140   | 61.064                   | 101.651 | 0.548   | -0.028                  | 0.107 | 0.791   |
| <i>SPRY2</i>    | rs1359790  | 0.007              | 0.006 | 0.273   | 14.392                   | 99.081  | 0.885   | -0.021                  | 0.104 | 0.843   |
| <i>IRS2</i>     | rs7987740  | -0.004             | 0.006 | 0.488   | 93.607                   | 93.727  | 0.318   | 0.000                   | 0.098 | 1.000   |
| <i>SLC7A7</i>   | rs17122772 | -0.009             | 0.007 | 0.247   | -7.578                   | 114.416 | 0.947   | -0.113                  | 0.121 | 0.349   |
| <i>AKAP6</i>    | rs17522122 | -0.003             | 0.006 | 0.643   | -33.279                  | 89.888  | 0.711   | 0.061                   | 0.094 | 0.512   |
| <i>CLEC14A</i>  | rs8017808  | 0.003              | 0.006 | 0.653   | 136.188                  | 99.041  | 0.170   | 0.022                   | 0.104 | 0.835   |
| <i>NRXN3</i>    | rs17836088 | -0.010             | 0.007 | 0.158   | 11.084                   | 110.065 | 0.920   | 0.081                   | 0.116 | 0.485   |
| <i>SMEK1</i>    | rs8010382  | 0.003              | 0.006 | 0.630   | 9.367                    | 94.996  | 0.921   | 0.011                   | 0.100 | 0.912   |
| <i>MARK3</i>    | rs62007683 | -0.012             | 0.006 | 0.044   | -4.392                   | 92.400  | 0.962   | -0.028                  | 0.097 | 0.774   |
| <i>RASGRP1</i>  | rs34715063 | 0.001              | 0.009 | 0.932   | -222.229                 | 138.491 | 0.109   | -0.105                  | 0.147 | 0.476   |
| <i>LTK</i>      | rs11070332 | -0.008             | 0.006 | 0.148   | 26.929                   | 89.812  | 0.764   | 0.074                   | 0.094 | 0.434   |
| <i>ONECUT1</i>  | rs2456530  | 0.026              | 0.009 | 0.003   | 16.050                   | 139.174 | 0.908   | -0.100                  | 0.146 | 0.495   |
| <i>C2CD4A/B</i> | rs8037894  | 0.011              | 0.006 | 0.054   | -36.102                  | 86.210  | 0.676   | 0.222                   | 0.094 | 0.018   |
| <i>USP3</i>     | rs7178762  | 0.006              | 0.006 | 0.287   | -4.909                   | 89.863  | 0.956   | 0.041                   | 0.095 | 0.662   |
| <i>MAP2K5</i>   | rs4776970  | 0.001              | 0.006 | 0.887   | 92.227                   | 91.303  | 0.313   | -0.004                  | 0.096 | 0.967   |
| <i>PTPN9</i>    | rs13737    | 0.006              | 0.007 | 0.339   | -112.002                 | 100.728 | 0.267   | -0.020                  | 0.107 | 0.850   |
| <i>HMG20A</i>   | rs1005752  | 0.000              | 0.006 | 0.975   | 132.055                  | 97.492  | 0.176   | 0.156                   | 0.103 | 0.128   |
| <i>AP3S2</i>    | rs4932265  | 0.010              | 0.007 | 0.141   | -27.566                  | 102.790 | 0.789   | 0.130                   | 0.108 | 0.229   |



| Locus         | Variant    | NEFA - V2 (nmol/l) |       |         | 1-hour C-Peptide (pg/ml) |         |         | 1-hour Glucose (mmol/l) |       |         |
|---------------|------------|--------------------|-------|---------|--------------------------|---------|---------|-------------------------|-------|---------|
|               |            | beta               | SE    | p-value | beta                     | SE      | p-value | beta                    | SE    | p-value |
| <i>PRC1</i>   | rs12910825 | 0.005              | 0.006 | 0.406   | -15.206                  | 91.026  | 0.867   | -0.093                  | 0.096 | 0.330   |
| <i>ITFG3</i>  | rs6600191  | 0.000              | 0.007 | 0.957   | 1.390                    | 115.282 | 0.990   | -0.002                  | 0.122 | 0.987   |
| <i>CLUAP1</i> | rs3751837  | -0.006             | 0.007 | 0.431   | -19.724                  | 113.636 | 0.862   | -0.154                  | 0.120 | 0.198   |
| <i>ATP2A1</i> | rs8046545  | 0.011              | 0.006 | 0.080   | 94.056                   | 95.724  | 0.326   | 0.163                   | 0.100 | 0.103   |
| <i>FAM57B</i> | rs11642430 | -0.004             | 0.006 | 0.557   | 9.829                    | 93.464  | 0.916   | 0.184                   | 0.099 | 0.063   |
| <i>FTO</i>    | rs1421085  | 0.004              | 0.006 | 0.523   | 38.081                   | 88.011  | 0.665   | 0.111                   | 0.092 | 0.231   |
| <i>NFAT5</i>  | rs862320   | -0.001             | 0.006 | 0.810   | -136.151                 | 90.212  | 0.132   | -0.185                  | 0.095 | 0.051   |
| <i>BCAR1</i>  | rs72802342 | -0.016             | 0.011 | 0.155   | 71.453                   | 173.716 | 0.681   | -0.120                  | 0.183 | 0.514   |
| <i>CMIP</i>   | rs2925979  | -0.009             | 0.006 | 0.132   | 60.402                   | 97.084  | 0.534   | -0.013                  | 0.102 | 0.896   |
| <i>SPG7</i>   | rs12920022 | 0.009              | 0.008 | 0.278   | 68.973                   | 131.904 | 0.601   | 0.198                   | 0.137 | 0.148   |
| <i>ZZEF1</i>  | rs1377807  | 0.006              | 0.006 | 0.322   | 22.858                   | 96.272  | 0.812   | 0.020                   | 0.101 | 0.841   |
| <i>ATP1B2</i> | rs1641523  | -0.005             | 0.006 | 0.404   | 116.601                  | 92.707  | 0.209   | 0.144                   | 0.098 | 0.142   |
| <i>GLP2R</i>  | rs7222481  | -0.006             | 0.006 | 0.361   | 214.207                  | 97.102  | 0.028   | 0.240                   | 0.103 | 0.020   |
| <i>RAI1</i>   | rs4925109  | -0.008             | 0.006 | 0.150   | 56.669                   | 90.155  | 0.530   | -0.008                  | 0.094 | 0.934   |
| <i>NF1</i>    | rs71372253 | 0.007              | 0.011 | 0.511   | 227.379                  | 170.814 | 0.184   | -0.020                  | 0.176 | 0.909   |
| <i>HNF1B</i>  | rs10908278 | -0.005             | 0.006 | 0.388   | -29.680                  | 89.112  | 0.739   | -0.092                  | 0.094 | 0.331   |
| <i>MLX</i>    | rs34855406 | -0.015             | 0.007 | 0.020   | -64.756                  | 101.281 | 0.523   | -0.269                  | 0.106 | 0.012   |
| <i>TTL6</i>   | rs35895680 | -0.006             | 0.006 | 0.322   | -34.356                  | 96.144  | 0.721   | -0.185                  | 0.101 | 0.068   |
| <i>ACE</i>    | rs60276348 | 0.018              | 0.007 | 0.017   | 148.774                  | 113.487 | 0.190   | 0.221                   | 0.120 | 0.066   |
| <i>BPTF</i>   | rs61676547 | -0.006             | 0.007 | 0.374   | -69.538                  | 106.148 | 0.513   | -0.161                  | 0.112 | 0.152   |
| <i>LAMA1</i>  | rs7240767  | 0.002              | 0.006 | 0.702   | 83.811                   | 89.849  | 0.351   | 0.011                   | 0.094 | 0.906   |
| <i>COMMD9</i> | rs62080313 | -0.005             | 0.009 | 0.531   | 80.300                   | 133.445 | 0.548   | -0.179                  | 0.139 | 0.197   |
| <i>TCF4</i>   | rs72926932 | 0.004              | 0.011 | 0.707   | -32.152                  | 167.515 | 0.848   | 0.015                   | 0.175 | 0.929   |
| <i>WDR7</i>   | rs17684074 | -0.006             | 0.007 | 0.391   | 84.030                   | 107.002 | 0.433   | 0.074                   | 0.112 | 0.509   |
| <i>GRP</i>    | rs9957145  | 0.018              | 0.008 | 0.029   | 177.786                  | 126.710 | 0.161   | 0.135                   | 0.133 | 0.313   |
| <i>MC4R</i>   | rs523288   | 0.010              | 0.007 | 0.114   | -66.008                  | 103.117 | 0.522   | 0.111                   | 0.108 | 0.306   |
| <i>BCL2A</i>  | rs12454712 | -0.003             | 0.007 | 0.619   | -132.447                 | 106.184 | 0.213   | -0.024                  | 0.112 | 0.827   |
| <i>UHRF1</i>  | rs7249758  | 0.008              | 0.007 | 0.289   | -41.374                  | 110.777 | 0.709   | -0.036                  | 0.117 | 0.758   |
| <i>INSR</i>   | rs75253922 | 0.009              | 0.007 | 0.224   | 22.916                   | 114.121 | 0.841   | -0.086                  | 0.120 | 0.474   |
| <i>MAP2K7</i> | rs4804833  | 0.006              | 0.006 | 0.318   | 91.202                   | 89.911  | 0.311   | 0.061                   | 0.095 | 0.518   |

| Locus              | Variant     | NEFA - V2 (nmol/l) |       |         | 1-hour C-Peptide (pg/ml) |         |         | 1-hour Glucose (mmol/l) |       |         |
|--------------------|-------------|--------------------|-------|---------|--------------------------|---------|---------|-------------------------|-------|---------|
|                    |             | beta               | SE    | p-value | beta                     | SE      | p-value | beta                    | SE    | p-value |
| <i>FARSA</i>       | rs3111316   | -0.003             | 0.006 | 0.646   | 55.704                   | 90.843  | 0.540   | -0.021                  | 0.096 | 0.829   |
| <i>TM6SF2</i>      | rs8107974   | -0.005             | 0.011 | 0.649   | -37.615                  | 176.064 | 0.831   | 0.073                   | 0.185 | 0.692   |
| <i>PEPD</i>        | rs10406327  | -0.001             | 0.006 | 0.892   | 64.605                   | 87.554  | 0.461   | 0.046                   | 0.092 | 0.618   |
| <i>TOMM40/APOE</i> | rs429358    | -0.005             | 0.009 | 0.545   | 179.288                  | 137.817 | 0.194   | 0.157                   | 0.145 | 0.279   |
| <i>GIPR</i>        | rs10406431  | -0.012             | 0.006 | 0.045   | 20.815                   | 89.948  | 0.817   | -0.030                  | 0.095 | 0.753   |
| <i>ZC3H4</i>       | rs3810291   | -0.006             | 0.006 | 0.315   | 46.792                   | 97.101  | 0.630   | 0.116                   | 0.102 | 0.258   |
| <i>NKX2.2</i>      | rs13041756  | 0.009              | 0.010 | 0.361   | -197.897                 | 151.972 | 0.193   | 0.065                   | 0.160 | 0.685   |
| <i>RALY</i>        | rs2268078   | 0.001              | 0.006 | 0.880   | 26.703                   | 95.571  | 0.780   | 0.057                   | 0.100 | 0.569   |
| <i>EYA2</i>        | rs6063048   | 0.011              | 0.007 | 0.094   | -245.488                 | 104.639 | 0.019   | 0.122                   | 0.110 | 0.271   |
| <i>CEBPB</i>       | rs11699802  | 0.000              | 0.006 | 1.000   | -72.806                  | 94.482  | 0.441   | -0.015                  | 0.099 | 0.878   |
| <i>TSHZ2</i>       | rs34454109  | 0.001              | 0.007 | 0.847   | -35.040                  | 108.804 | 0.748   | -0.085                  | 0.114 | 0.453   |
| <i>GNAS</i>        | rs6070625   | 0.002              | 0.006 | 0.694   | -32.445                  | 88.777  | 0.715   | -0.157                  | 0.093 | 0.092   |
| <i>TCEA2</i>       | rs59944054  | -0.007             | 0.007 | 0.323   | -11.609                  | 107.080 | 0.914   | 0.032                   | 0.112 | 0.779   |
| <i>MTMR3/ASCC2</i> | rs6518681   | -0.007             | 0.011 | 0.533   | 115.320                  | 170.784 | 0.500   | 0.011                   | 0.181 | 0.951   |
| <i>YWHAH</i>       | rs117001013 | -0.009             | 0.012 | 0.477   | -397.844                 | 190.892 | 0.038   | 0.075                   | 0.202 | 0.712   |
| <i>EP300</i>       | rs5758223   | 0.001              | 0.007 | 0.917   | 45.896                   | 101.752 | 0.652   | -0.081                  | 0.107 | 0.449   |
| <i>PNPLA3</i>      | rs738408    | -0.005             | 0.006 | 0.416   | -234.469                 | 100.248 | 0.020   | -0.043                  | 0.106 | 0.685   |
| <i>PIM3</i>        | rs1801645   | -0.012             | 0.008 | 0.123   | 116.192                  | 116.439 | 0.319   | -0.097                  | 0.123 | 0.429   |

| Locus               | Variant     | 1- hour Insulin (pg/ml) |         |         | Oral Disposition Index |         |         | Stumvoll 1st Phase Estimate |         |         |
|---------------------|-------------|-------------------------|---------|---------|------------------------|---------|---------|-----------------------------|---------|---------|
|                     |             | beta                    | SE      | p-value | beta                   | SE      | p-value | beta                        | SE      | p-value |
| <i>MACF1</i>        | rs3768321   | 45.089                  | 82.127  | 0.583   | 31.919                 | 290.649 | 0.913   | 69.076                      | 33.032  | 0.037   |
| <i>FAF1</i>         | rs58432198  | 40.577                  | 107.040 | 0.705   | -729.899               | 377.721 | 0.054   | 21.070                      | 43.256  | 0.626   |
| <i>PATJ</i>         | rs12140153  | -64.251                 | 119.811 | 0.592   | -16.496                | 424.566 | 0.969   | -21.567                     | 48.313  | 0.655   |
| <i>PTGFRN</i>       | rs1127215   | -30.670                 | 66.741  | 0.646   | -4.208                 | 237.940 | 0.986   | -47.564                     | 26.976  | 0.078   |
| <i>NOTCH2</i>       | rs1493694   | -46.067                 | 115.824 | 0.691   | 74.656                 | 409.179 | 0.855   | -2.724                      | 46.718  | 0.954   |
| <i>SEC16B</i>       | rs539515    | -74.714                 | 87.649  | 0.394   | 249.677                | 313.036 | 0.425   | -45.012                     | 35.657  | 0.207   |
| <i>DSTYK</i>        | rs12048743  | -45.306                 | 69.032  | 0.512   | -339.988               | 244.230 | 0.164   | 25.682                      | 27.888  | 0.358   |
| <i>SRGAP2</i>       | rs9430095   | 33.513                  | 66.483  | 0.614   | -58.794                | 235.809 | 0.803   | -5.138                      | 26.896  | 0.849   |
| <i>PROX1</i>        | rs340874    | -39.946                 | 67.623  | 0.555   | -176.471               | 240.663 | 0.464   | -16.633                     | 27.358  | 0.543   |
| <i>LYPLAL1</i>      | rs2820446   | 71.347                  | 75.691  | 0.346   | -547.627               | 267.313 | 0.041   | 55.233                      | 30.516  | 0.071   |
| <i>ABCB10</i>       | rs348330    | 9.858                   | 70.423  | 0.889   | 185.749                | 249.581 | 0.457   | -10.614                     | 28.508  | 0.710   |
| <i>GNG4</i>         | rs291367    | 13.781                  | 70.741  | 0.846   | 222.609                | 251.090 | 0.376   | 23.352                      | 28.535  | 0.413   |
| <i>FAM49A</i>       | rs11680058  | 52.631                  | 99.256  | 0.596   | 8.231                  | 352.725 | 0.981   | 6.020                       | 40.121  | 0.881   |
| <i>DTNB</i>         | rs17802463  | 54.298                  | 74.643  | 0.467   | 161.986                | 264.313 | 0.540   | 38.089                      | 30.117  | 0.207   |
| <i>GCKR</i>         | rs1260326   | 87.167                  | 65.994  | 0.187   | 7.688                  | 234.490 | 0.974   | 48.921                      | 26.614  | 0.067   |
| <i>THADA</i>        | rs80147536  | 50.241                  | 107.242 | 0.640   | -138.228               | 378.861 | 0.715   | -7.615                      | 43.259  | 0.860   |
| <i>BNIP1</i>        | rs6545714   | 103.575                 | 69.011  | 0.134   | 25.077                 | 245.291 | 0.919   | 41.831                      | 27.853  | 0.134   |
| <i>BCL11A</i>       | rs243024    | -76.742                 | 67.183  | 0.254   | 134.084                | 238.789 | 0.575   | -9.303                      | 27.245  | 0.733   |
| <i>CEP68</i>        | rs2249105   | 142.818                 | 69.352  | 0.040   | 183.253                | 248.690 | 0.462   | 39.496                      | 28.205  | 0.162   |
| <i>GLI2</i>         | rs11688682  | 161.013                 | 82.271  | 0.051   | -203.192               | 292.098 | 0.487   | 98.592                      | 33.057  | 0.003   |
| <i>PABPC1P2</i>     | rs35999103  | 98.210                  | 85.861  | 0.253   | 66.407                 | 304.719 | 0.828   | 42.182                      | 34.698  | 0.225   |
| <i>CYTIP</i>        | rs13426680  | 114.686                 | 135.348 | 0.397   | -690.583               | 479.886 | 0.151   | -4.480                      | 54.610  | 0.935   |
| <i>RBMS1</i>        | rs3772071   | -21.747                 | 73.589  | 0.768   | -143.923               | 260.226 | 0.580   | 2.098                       | 29.706  | 0.944   |
| <i>GRB14/COBLL1</i> | rs10195252  | 75.577                  | 71.909  | 0.294   | -248.095               | 254.827 | 0.331   | -6.429                      | 29.054  | 0.825   |
| <i>G6PC2</i>        | rs1402837   | -126.946                | 76.274  | 0.097   | 191.987                | 270.555 | 0.478   | -24.962                     | 30.852  | 0.419   |
| <i>CRYBA2</i>       | rs113414093 | 531.668                 | 264.626 | 0.045   | -999.819               | 936.901 | 0.286   | 82.504                      | 107.060 | 0.441   |
| <i>IRS1</i>         | rs2972144   | 157.460                 | 72.249  | 0.030   | -224.656               | 256.536 | 0.382   | 27.571                      | 29.234  | 0.346   |
| <i>PPARG</i>        | rs11709077  | 24.307                  | 107.958 | 0.822   | -481.026               | 381.866 | 0.208   | 0.244                       | 43.659  | 0.996   |

| Locus           | Variant    | 1- hour Insulin (pg/ml) |         |         | Oral Disposition Index |         |         | Stumvoll 1st Phase Estimate |        |         |
|-----------------|------------|-------------------------|---------|---------|------------------------|---------|---------|-----------------------------|--------|---------|
|                 |            | beta                    | SE      | p-value | beta                   | SE      | p-value | beta                        | SE     | p-value |
| <i>UBE2E2</i>   | rs35352848 | -12.973                 | 80.885  | 0.873   | -43.721                | 286.183 | 0.879   | -23.939                     | 32.632 | 0.464   |
| <i>KIF9</i>     | rs11926707 | -55.437                 | 70.353  | 0.431   | -16.119                | 249.567 | 0.949   | 11.163                      | 27.364 | 0.683   |
| <i>RBM6</i>     | rs4688760  | -18.137                 | 74.731  | 0.808   | -248.414               | 264.469 | 0.348   | -8.651                      | 30.177 | 0.774   |
| <i>RFT1</i>     | rs2581787  | -54.437                 | 67.361  | 0.419   | -126.940               | 238.632 | 0.595   | -11.981                     | 27.224 | 0.660   |
| <i>PSMD6</i>    | rs3774723  | 21.901                  | 92.514  | 0.813   | -373.551               | 327.527 | 0.255   | -43.288                     | 37.284 | 0.246   |
| <i>ADAMTS9</i>  | rs9860730  | -36.223                 | 70.126  | 0.606   | -189.654               | 249.127 | 0.447   | -34.710                     | 28.382 | 0.222   |
| <i>SHQ1</i>     | rs13085136 | -17.524                 | 171.283 | 0.919   | -1761.456              | 605.490 | 0.004   | 114.629                     | 68.885 | 0.097   |
| <i>ROBO2</i>    | rs2272163  | -80.342                 | 68.385  | 0.241   | 54.929                 | 243.867 | 0.822   | -24.511                     | 27.760 | 0.378   |
| <i>ADCY5</i>    | rs11708067 | -10.296                 | 82.052  | 0.900   | -452.626               | 289.938 | 0.119   | 27.275                      | 33.101 | 0.410   |
| <i>SLC12A8</i>  | rs649961   | 15.468                  | 66.995  | 0.817   | 68.455                 | 237.575 | 0.773   | 26.185                      | 27.080 | 0.334   |
| <i>TMCC1</i>    | rs9828772  | 74.913                  | 122.129 | 0.540   | -43.973                | 434.882 | 0.919   | 47.486                      | 49.420 | 0.337   |
| <i>TSC22D2</i>  | rs62271373 | 45.427                  | 120.998 | 0.707   | -306.593               | 428.838 | 0.475   | 79.585                      | 48.875 | 0.104   |
| <i>MBNL1</i>    | rs13065698 | -36.470                 | 69.656  | 0.601   | 268.607                | 246.520 | 0.276   | -19.418                     | 28.078 | 0.489   |
| <i>EGFEM1P</i>  | rs7629630  | 22.427                  | 94.920  | 0.813   | -51.674                | 336.517 | 0.878   | 17.818                      | 38.345 | 0.642   |
| <i>SLC2A2</i>   | rs9873618  | 180.300                 | 74.001  | 0.015   | -319.805               | 263.652 | 0.226   | 41.921                      | 29.976 | 0.163   |
| <i>ABCC5</i>    | rs2872246  | 3.255                   | 64.877  | 0.960   | 183.140                | 230.521 | 0.427   | -32.731                     | 26.201 | 0.212   |
| <i>IGF2BP2</i>  | rs6780171  | -75.108                 | 73.324  | 0.306   | -39.634                | 259.688 | 0.879   | -44.709                     | 29.577 | 0.131   |
| <i>ST6GAL1</i>  | rs3887925  | -59.104                 | 67.373  | 0.381   | 209.406                | 238.940 | 0.381   | -30.706                     | 27.184 | 0.259   |
| <i>LPP</i>      | rs4686471  | 31.344                  | 69.896  | 0.654   | 31.092                 | 247.294 | 0.900   | 8.204                       | 28.212 | 0.771   |
| <i>MAEA</i>     | rs56337234 | -5.586                  | 74.291  | 0.940   | -158.933               | 263.354 | 0.546   | 46.343                      | 29.997 | 0.123   |
| <i>HTT</i>      | rs362307   | 63.647                  | 133.657 | 0.634   | -206.840               | 483.983 | 0.669   | 3.692                       | 53.903 | 0.945   |
| <i>WFS1</i>     | rs10937721 | -17.696                 | 67.861  | 0.794   | -9.878                 | 240.674 | 0.967   | -19.952                     | 27.378 | 0.466   |
| <i>LCORL</i>    | rs12640250 | 65.393                  | 78.121  | 0.403   | 395.736                | 276.274 | 0.153   | -8.646                      | 31.557 | 0.784   |
| <i>GNPDA2</i>   | rs10938398 | -21.273                 | 66.979  | 0.751   | -342.272               | 238.272 | 0.151   | 16.442                      | 27.190 | 0.546   |
| <i>USP46</i>    | rs2102278  | -38.076                 | 73.686  | 0.606   | 145.936                | 261.713 | 0.577   | -34.069                     | 29.828 | 0.254   |
| <i>SCD5</i>     | rs12642790 | -12.410                 | 71.548  | 0.862   | 602.929                | 252.872 | 0.017   | -9.950                      | 28.897 | 0.731   |
| <i>FAM13A</i>   | rs1903002  | 89.470                  | 68.245  | 0.190   | -142.442               | 242.430 | 0.557   | 0.786                       | 27.652 | 0.977   |
| <i>SMARCAD1</i> | rs6821438  | -45.332                 | 68.650  | 0.509   | -154.851               | 244.114 | 0.526   | -20.379                     | 27.772 | 0.463   |
| <i>SLC9B1</i>   | rs1580278  | 40.167                  | 69.125  | 0.561   | -185.207               | 244.912 | 0.450   | -2.026                      | 27.931 | 0.942   |
| <i>PABPC4L</i>  | rs1296328  | -41.531                 | 70.658  | 0.557   | 34.268                 | 249.967 | 0.891   | -61.312                     | 28.437 | 0.032   |

| Locus          | Variant    | 1- hour Insulin (pg/ml) |         |         | Oral Disposition Index |         |         | Stumvoll 1st Phase Estimate |        |         |
|----------------|------------|-------------------------|---------|---------|------------------------|---------|---------|-----------------------------|--------|---------|
|                |            | beta                    | SE      | p-value | beta                   | SE      | p-value | beta                        | SE     | p-value |
| <i>TMEM154</i> | rs7669833  | 39.122                  | 72.490  | 0.590   | -160.154               | 257.533 | 0.534   | -21.486                     | 29.375 | 0.465   |
| <i>PDGFC</i>   | rs28819812 | 45.705                  | 71.537  | 0.523   | -383.816               | 253.538 | 0.131   | -31.782                     | 28.936 | 0.273   |
| <i>ACSL1</i>   | rs58730668 | -83.939                 | 99.452  | 0.399   | 260.385                | 352.140 | 0.460   | 10.521                      | 40.137 | 0.793   |
| <i>MRPS30</i>  | rs6884702  | -8.227                  | 68.103  | 0.904   | -205.673               | 242.536 | 0.397   | -31.065                     | 27.606 | 0.261   |
| <i>ITGA1</i>   | rs3811978  | 54.034                  | 91.148  | 0.554   | -537.134               | 321.920 | 0.096   | 115.526                     | 36.461 | 0.002   |
| <i>ARL15</i>   | rs702634   | -19.298                 | 73.937  | 0.794   | 256.677                | 261.551 | 0.327   | -11.776                     | 29.842 | 0.693   |
| <i>ANKRD55</i> | rs465002   | 135.476                 | 73.915  | 0.067   | -615.985               | 261.218 | 0.019   | 49.916                      | 29.864 | 0.095   |
| <i>PIK3R1</i>  | rs4976033  | 87.936                  | 65.872  | 0.182   | -342.889               | 234.567 | 0.144   | 17.544                      | 26.709 | 0.512   |
| <i>POC5</i>    | rs2307111  | 54.029                  | 66.223  | 0.415   | -83.780                | 235.192 | 0.722   | 17.771                      | 26.794 | 0.507   |
| <i>ZBED3</i>   | rs4457053  | -129.497                | 73.275  | 0.078   | -16.245                | 260.938 | 0.950   | -36.330                     | 29.619 | 0.220   |
| <i>DMGDH</i>   | rs1316776  | -21.550                 | 71.492  | 0.763   | 155.748                | 254.590 | 0.541   | -14.238                     | 28.948 | 0.623   |
| <i>RASA1</i>   | rs7719891  | -76.579                 | 71.548  | 0.285   | -449.994               | 253.816 | 0.077   | -42.859                     | 28.969 | 0.140   |
| <i>PCSK1</i>   | rs13179048 | -81.634                 | 71.400  | 0.253   | -138.410               | 253.032 | 0.585   | -26.682                     | 28.846 | 0.355   |
| <i>PHF15</i>   | rs329122   | 58.268                  | 70.374  | 0.408   | -51.191                | 249.998 | 0.838   | 46.740                      | 28.402 | 0.100   |
| <i>EBF1</i>    | rs3934712  | 60.126                  | 81.144  | 0.459   | -70.840                | 289.071 | 0.806   | 18.684                      | 32.770 | 0.569   |
| <i>RREB1</i>   | rs9379084  | -80.504                 | 109.150 | 0.461   | 32.874                 | 386.773 | 0.932   | -16.842                     | 44.155 | 0.703   |
| <i>CDKAL1</i>  | rs7756992  | -33.658                 | 75.134  | 0.654   | -277.403               | 265.775 | 0.297   | -37.213                     | 30.302 | 0.220   |
| <i>MHC</i>     | rs601945   | 81.715                  | 100.432 | 0.416   | -133.410               | 355.072 | 0.707   | 3.317                       | 40.536 | 0.935   |
| <i>LRFN2</i>   | rs34298980 | -56.881                 | 71.779  | 0.428   | 259.811                | 254.770 | 0.308   | -12.366                     | 29.036 | 0.670   |
| <i>VEGFA</i>   | rs6458354  | -11.543                 | 75.869  | 0.879   | -149.425               | 269.623 | 0.580   | 0.930                       | 30.629 | 0.976   |
| <i>TFAP2B</i>  | rs3798519  | 69.418                  | 86.876  | 0.425   | -273.963               | 309.850 | 0.377   | 18.780                      | 35.341 | 0.595   |
| <i>BEND3</i>   | rs4946812  | -19.558                 | 76.031  | 0.797   | 173.934                | 269.122 | 0.518   | -37.811                     | 30.666 | 0.218   |
| <i>CENPW</i>   | rs11759026 | 27.117                  | 82.068  | 0.741   | 87.684                 | 290.659 | 0.763   | 45.939                      | 33.087 | 0.166   |
| <i>SOGA3</i>   | rs2800733  | -60.121                 | 75.956  | 0.429   | -479.156               | 268.298 | 0.075   | 17.146                      | 30.674 | 0.576   |
| <i>SLC35D3</i> | rs9494624  | -56.250                 | 76.673  | 0.463   | -201.275               | 271.465 | 0.459   | -47.693                     | 30.907 | 0.123   |
| <i>MIR3668</i> | rs2982521  | 42.781                  | 69.980  | 0.541   | 224.952                | 248.424 | 0.366   | 16.442                      | 28.330 | 0.562   |
| <i>SLC22A3</i> | rs474513   | -39.166                 | 67.853  | 0.564   | 46.671                 | 240.678 | 0.846   | 9.244                       | 27.446 | 0.736   |
| <i>QKI</i>     | rs4709746  | 126.357                 | 97.818  | 0.197   | -247.320               | 346.702 | 0.476   | 30.893                      | 39.565 | 0.435   |
| <i>DGKB</i>    | rs10228066 | 56.121                  | 68.113  | 0.410   | -135.851               | 241.890 | 0.575   | -4.235                      | 27.510 | 0.878   |
| <i>IGF2BP3</i> | rs4279506  | 124.294                 | 67.799  | 0.067   | -19.277                | 240.924 | 0.936   | 25.227                      | 27.424 | 0.358   |

| Locus           | Variant    | 1- hour Insulin (pg/ml) |         |         | Oral Disposition Index |         |         | Stumvoll 1st Phase Estimate |        |         |
|-----------------|------------|-------------------------|---------|---------|------------------------|---------|---------|-----------------------------|--------|---------|
|                 |            | beta                    | SE      | p-value | beta                   | SE      | p-value | beta                        | SE     | p-value |
| <i>JAZF1</i>    | rs1708302  | -43.419                 | 65.979  | 0.511   | 169.443                | 234.393 | 0.470   | -39.426                     | 26.644 | 0.140   |
| <i>CRHR2</i>    | rs917195   | 97.731                  | 78.915  | 0.216   | -862.835               | 277.333 | 0.002   | -3.159                      | 31.907 | 0.921   |
| <i>GCK</i>      | rs878521   | -29.411                 | 77.066  | 0.703   | -430.850               | 272.315 | 0.114   | -14.268                     | 31.116 | 0.647   |
| <i>FBXL13</i>   | rs11496066 | -67.577                 | 88.454  | 0.445   | 194.384                | 312.958 | 0.535   | -102.225                    | 35.454 | 0.004   |
| <i>RELN</i>     | rs39328    | 24.330                  | 69.045  | 0.725   | -54.737                | 245.462 | 0.824   | 12.101                      | 27.971 | 0.665   |
| <i>CTTNBP2</i>  | rs6976111  | -119.009                | 73.487  | 0.106   | -99.751                | 262.786 | 0.704   | -40.374                     | 29.812 | 0.176   |
| <i>KLF14</i>    | rs1562396  | 40.576                  | 74.235  | 0.585   | -35.574                | 263.897 | 0.893   | 40.622                      | 30.012 | 0.176   |
| <i>AOC1</i>     | rs62492368 | 81.341                  | 72.492  | 0.262   | 216.377                | 256.946 | 0.400   | 12.326                      | 29.307 | 0.674   |
| <i>MNX1</i>     | rs6459733  | 113.233                 | 67.561  | 0.094   | -59.049                | 239.802 | 0.806   | 35.555                      | 27.293 | 0.193   |
| <i>PPP1R3B</i>  | rs4841132  | 100.599                 | 128.343 | 0.433   | 443.821                | 465.885 | 0.341   | 66.090                      | 51.948 | 0.204   |
| <i>MSRA</i>     | rs17689007 | -60.199                 | 64.914  | 0.354   | 703.700                | 228.044 | 0.002   | -0.768                      | 26.222 | 0.977   |
| <i>XKR6</i>     | rs57327348 | -18.279                 | 92.496  | 0.843   | -110.951               | 326.988 | 0.735   | -7.257                      | 37.331 | 0.846   |
| <i>LPL</i>      | rs10096633 | 1.792                   | 98.890  | 0.986   | -538.957               | 349.997 | 0.124   | -7.411                      | 39.962 | 0.853   |
| <i>PURG</i>     | rs10954772 | 223.218                 | 71.352  | 0.002   | -292.751               | 257.096 | 0.255   | 46.584                      | 29.190 | 0.111   |
| <i>ANK1</i>     | rs13262861 | 10.465                  | 83.782  | 0.901   | 315.156                | 296.581 | 0.288   | 15.601                      | 33.844 | 0.645   |
| <i>TP53INP1</i> | rs10097617 | -88.776                 | 67.746  | 0.191   | -25.878                | 240.268 | 0.914   | -15.430                     | 27.395 | 0.574   |
| <i>TRHR</i>     | rs12680028 | 1.707                   | 67.299  | 0.980   | -152.871               | 237.875 | 0.521   | 10.904                      | 27.123 | 0.688   |
| <i>SLC30A8</i>  | rs3802177  | -134.099                | 74.499  | 0.072   | 107.533                | 264.446 | 0.684   | -63.237                     | 30.051 | 0.036   |
| <i>CASC11</i>   | rs17772814 | -103.260                | 125.413 | 0.411   | 426.475                | 444.702 | 0.338   | -1.781                      | 50.822 | 0.972   |
| <i>PVT1</i>     | rs1561927  | 7.961                   | 73.558  | 0.914   | 4.700                  | 261.431 | 0.986   | -17.362                     | 29.802 | 0.560   |
| <i>BOP1</i>     | rs4977213  | -170.301                | 66.750  | 0.011   | 634.125                | 236.150 | 0.007   | -41.410                     | 27.037 | 0.126   |
| <i>GLIS3</i>    | rs10974438 | -88.244                 | 70.510  | 0.211   | 0.387                  | 249.987 | 0.999   | -22.697                     | 28.481 | 0.426   |
| <i>HAUS6</i>    | rs7022807  | 50.775                  | 68.684  | 0.460   | -41.198                | 244.926 | 0.866   | -1.470                      | 27.838 | 0.958   |
| <i>FOCAD</i>    | rs7867635  | 115.475                 | 68.620  | 0.093   | -382.391               | 243.523 | 0.117   | -7.157                      | 27.871 | 0.797   |
| <i>CDKN2A/B</i> | rs10811660 | -152.523                | 92.064  | 0.098   | 193.248                | 326.986 | 0.555   | -33.008                     | 37.256 | 0.376   |
| <i>LINGO2</i>   | rs1412234  | -57.142                 | 72.240  | 0.429   | 196.868                | 255.863 | 0.442   | -14.445                     | 29.184 | 0.621   |
| <i>UBAP2</i>    | rs12001437 | 31.683                  | 67.762  | 0.640   | -99.184                | 239.713 | 0.679   | -5.361                      | 27.322 | 0.845   |
| <i>MTND2P8</i>  | rs11137820 | -37.696                 | 66.532  | 0.571   | 551.885                | 234.751 | 0.019   | 5.550                       | 26.915 | 0.837   |
| <i>TLE4</i>     | rs17791513 | 111.968                 | 143.448 | 0.435   | -733.063               | 515.418 | 0.156   | 77.770                      | 58.496 | 0.184   |
| <i>TLE1</i>     | rs2796441  | 60.631                  | 65.481  | 0.355   | -106.376               | 231.986 | 0.647   | -11.808                     | 26.445 | 0.655   |

| Locus                | Variant    | 1- hour Insulin (pg/ml) |         |         | Oral Disposition Index |         |         | Stumvoll 1st Phase Estimate |        |         |
|----------------------|------------|-------------------------|---------|---------|------------------------|---------|---------|-----------------------------|--------|---------|
|                      |            | beta                    | SE      | p-value | beta                   | SE      | p-value | beta                        | SE     | p-value |
| <i>ZNF169</i>        | rs55653563 | 66.005                  | 75.099  | 0.380   | -118.377               | 266.044 | 0.657   | 33.244                      | 30.304 | 0.273   |
| <i>ABO</i>           | rs505922   | -147.260                | 68.767  | 0.033   | 106.064                | 244.931 | 0.665   | -72.954                     | 27.779 | 0.009   |
| <i>GPSM1</i>         | rs28505901 | -93.646                 | 85.665  | 0.275   | -249.339               | 303.511 | 0.412   | -25.296                     | 34.609 | 0.465   |
| <i>CDC123/CAMK1D</i> | rs11257655 | -57.870                 | 83.955  | 0.491   | -143.790               | 299.084 | 0.631   | -51.016                     | 34.063 | 0.135   |
| <i>HKDC1</i>         | rs4746822  | -3.248                  | 69.573  | 0.963   | -303.852               | 247.305 | 0.220   | -32.679                     | 28.132 | 0.246   |
| <i>NEUROG3</i>       | rs2642588  | 80.800                  | 73.010  | 0.269   | -177.797               | 258.308 | 0.492   | 50.642                      | 29.402 | 0.086   |
| <i>ZMIZ1</i>         | rs703972   | 87.316                  | 69.990  | 0.213   | -163.581               | 248.577 | 0.511   | 27.967                      | 28.336 | 0.324   |
| <i>PTEN</i>          | rs11202627 | 9.113                   | 94.215  | 0.923   | -529.122               | 332.706 | 0.112   | 25.227                      | 37.989 | 0.507   |
| <i>HHEX/IDE</i>      | rs10882101 | 82.920                  | 67.474  | 0.220   | -224.826               | 238.906 | 0.347   | 26.549                      | 27.250 | 0.330   |
| <i>TCF7L2</i>        | rs7903146  | -69.443                 | 70.187  | 0.323   | -407.848               | 248.346 | 0.101   | -22.147                     | 28.353 | 0.435   |
| <i>WDR11</i>         | rs72631105 | -114.734                | 89.248  | 0.199   | 382.139                | 316.545 | 0.228   | -40.678                     | 36.094 | 0.260   |
| <i>PLEKHA1</i>       | rs2280141  | 49.463                  | 68.113  | 0.468   | -227.699               | 241.390 | 0.346   | -30.706                     | 27.480 | 0.264   |
| <i>INS/IGF2</i>      | rs4929965  | 151.906                 | 68.564  | 0.027   | 199.941                | 243.868 | 0.413   | 53.560                      | 27.723 | 0.054   |
| <i>KCNQ1</i>         | rs2237895  | -56.363                 | 65.227  | 0.388   | -367.569               | 229.867 | 0.110   | -46.839                     | 26.315 | 0.076   |
| <i>KCNJ11</i>        | rs5213     | -3.733                  | 73.458  | 0.959   | -86.830                | 261.019 | 0.740   | -53.038                     | 29.592 | 0.074   |
| <i>METTL15</i>       | rs4923543  | -21.110                 | 73.779  | 0.775   | 175.317                | 260.996 | 0.502   | 32.796                      | 29.752 | 0.271   |
| <i>PDHX</i>          | rs2767036  | -40.712                 | 73.525  | 0.580   | 28.450                 | 260.410 | 0.913   | -63.592                     | 29.563 | 0.032   |
| <i>HSD17B12</i>      | rs1061810  | 38.190                  | 75.194  | 0.612   | 220.427                | 266.552 | 0.409   | -21.670                     | 30.373 | 0.476   |
| <i>CRY2</i>          | rs7115753  | 74.169                  | 68.468  | 0.279   | -192.225               | 243.631 | 0.430   | 2.120                       | 27.699 | 0.939   |
| <i>CELF1</i>         | rs7124681  | 1.820                   | 65.362  | 0.978   | -196.733               | 232.184 | 0.397   | -49.185                     | 26.367 | 0.063   |
| <i>MAP3K11</i>       | rs1783541  | -27.297                 | 89.815  | 0.761   | -95.156                | 318.527 | 0.765   | 6.291                       | 36.312 | 0.863   |
| <i>CENTD2/ARAP1</i>  | rs77464186 | 40.018                  | 95.744  | 0.676   | -114.617               | 338.446 | 0.735   | 32.833                      | 38.607 | 0.395   |
| <i>MTNR1B</i>        | rs10830963 | 10.110                  | 75.043  | 0.893   | -672.757               | 265.267 | 0.011   | -30.820                     | 30.403 | 0.311   |
| <i>ETS1</i>          | rs67232546 | -103.724                | 80.443  | 0.198   | -36.454                | 285.021 | 0.898   | -64.473                     | 32.401 | 0.047   |
| <i>CDKN1B</i>        | rs2066827  | -106.636                | 103.822 | 0.305   | -21.520                | 369.014 | 0.954   | -142.379                    | 41.598 | 0.001   |
| <i>ITPR2</i>         | rs718314   | 3.182                   | 77.452  | 0.967   | 313.076                | 273.908 | 0.254   | 6.564                       | 31.272 | 0.834   |
| <i>KLHDC5</i>        | rs10842994 | 33.833                  | 81.918  | 0.680   | -130.583               | 289.991 | 0.653   | -9.287                      | 33.071 | 0.779   |
| <i>HMGA2</i>         | rs2258238  | 52.423                  | 105.660 | 0.620   | 193.149                | 374.206 | 0.606   | -37.981                     | 42.597 | 0.373   |
| <i>TSPAN8/LGR5</i>   | rs1796330  | -2.784                  | 68.586  | 0.968   | 30.551                 | 243.632 | 0.900   | 8.441                       | 27.724 | 0.761   |
| <i>USP44</i>         | rs2197973  | 81.360                  | 65.862  | 0.217   | 62.911                 | 234.305 | 0.788   | 33.493                      | 26.637 | 0.209   |

| Locus           | Variant    | 1- hour Insulin (pg/ml) |         |         | Oral Disposition Index |         |         | Stumvoll 1st Phase Estimate |        |         |
|-----------------|------------|-------------------------|---------|---------|------------------------|---------|---------|-----------------------------|--------|---------|
|                 |            | beta                    | SE      | p-value | beta                   | SE      | p-value | beta                        | SE     | p-value |
| <i>RMST</i>     | rs77864822 | 240.796                 | 135.837 | 0.077   | -517.819               | 483.104 | 0.284   | 19.096                      | 54.917 | 0.728   |
| <i>WSCD2</i>    | rs1426371  | 1.332                   | 84.220  | 0.987   | -43.544                | 298.443 | 0.884   | -6.772                      | 34.010 | 0.842   |
| <i>KSR2</i>     | rs34965774 | -46.915                 | 96.576  | 0.627   | -69.283                | 344.879 | 0.841   | -25.538                     | 39.351 | 0.517   |
| <i>HNF1A</i>    | rs56348580 | 44.548                  | 73.840  | 0.547   | -265.939               | 261.078 | 0.309   | -8.645                      | 29.808 | 0.772   |
| <i>MPHOSPH9</i> | rs4148856  | 39.943                  | 76.477  | 0.602   | -372.373               | 270.342 | 0.169   | 41.825                      | 30.830 | 0.175   |
| <i>ZNF664</i>   | rs7978610  | -158.048                | 68.905  | 0.022   | -48.549                | 244.677 | 0.843   | -51.410                     | 27.832 | 0.065   |
| <i>FBRSL1</i>   | rs12811407 | 104.987                 | 72.880  | 0.150   | -47.504                | 259.446 | 0.855   | 18.495                      | 29.574 | 0.532   |
| <i>RNF6</i>     | rs34584161 | 72.441                  | 75.874  | 0.340   | 94.867                 | 270.055 | 0.726   | 1.587                       | 30.659 | 0.959   |
| <i>HMGB1</i>    | rs11842871 | -30.748                 | 83.366  | 0.712   | -471.936               | 294.633 | 0.110   | 12.829                      | 33.657 | 0.703   |
| <i>KL</i>       | rs576674   | 39.861                  | 84.085  | 0.636   | 151.780                | 297.783 | 0.610   | 18.822                      | 33.930 | 0.579   |
| <i>DLEU1</i>    | rs963740   | 55.024                  | 74.333  | 0.459   | -338.038               | 262.910 | 0.199   | 45.704                      | 29.957 | 0.128   |
| <i>PCDH17</i>   | rs9537803  | -26.770                 | 75.800  | 0.724   | 20.314                 | 268.388 | 0.940   | 1.403                       | 30.605 | 0.963   |
| <i>SRGAP2D</i>  | rs9563615  | -123.474                | 76.270  | 0.106   | -367.342               | 270.245 | 0.175   | -6.418                      | 30.873 | 0.835   |
| <i>SPRY2</i>    | rs1359790  | -94.082                 | 74.322  | 0.206   | 206.617                | 263.336 | 0.433   | -15.764                     | 30.047 | 0.600   |
| <i>IRS2</i>     | rs7987740  | 34.998                  | 70.067  | 0.618   | 126.960                | 249.100 | 0.610   | 53.129                      | 28.336 | 0.061   |
| <i>SLC7A7</i>   | rs17122772 | -127.668                | 86.182  | 0.139   | 534.227                | 304.775 | 0.080   | -50.484                     | 34.793 | 0.147   |
| <i>AKAP6</i>    | rs17522122 | -35.573                 | 66.898  | 0.595   | -270.533               | 237.849 | 0.256   | -21.710                     | 27.056 | 0.423   |
| <i>CLEC14A</i>  | rs8017808  | -1.282                  | 74.240  | 0.986   | 36.746                 | 262.790 | 0.889   | 3.352                       | 29.969 | 0.911   |
| <i>NRXN3</i>    | rs17836088 | -15.236                 | 82.723  | 0.854   | 14.358                 | 292.799 | 0.961   | -28.233                     | 33.366 | 0.398   |
| <i>SMEK1</i>    | rs8010382  | 83.546                  | 71.370  | 0.242   | -340.004               | 252.812 | 0.179   | 25.148                      | 28.823 | 0.383   |
| <i>MARK3</i>    | rs62007683 | 86.142                  | 69.360  | 0.215   | 13.006                 | 246.035 | 0.958   | 37.444                      | 28.006 | 0.182   |
| <i>RASGRP1</i>  | rs34715063 | -103.869                | 104.164 | 0.319   | 295.608                | 369.831 | 0.424   | 16.202                      | 42.142 | 0.701   |
| <i>LTK</i>      | rs11070332 | -10.802                 | 67.490  | 0.873   | 187.112                | 239.495 | 0.435   | -47.452                     | 27.165 | 0.081   |
| <i>ONECUT1</i>  | rs2456530  | -87.926                 | 104.210 | 0.399   | -32.048                | 370.917 | 0.931   | -20.413                     | 42.239 | 0.629   |
| <i>C2CD4A/B</i> | rs8037894  | 53.816                  | 67.152  | 0.423   | -234.903               | 237.564 | 0.323   | -20.222                     | 27.057 | 0.455   |
| <i>USP3</i>     | rs7178762  | -14.889                 | 67.452  | 0.825   | -185.478               | 238.485 | 0.437   | -22.373                     | 27.207 | 0.411   |
| <i>MAP2K5</i>   | rs4776970  | 13.104                  | 68.583  | 0.849   | 299.787                | 243.360 | 0.219   | 21.797                      | 27.767 | 0.433   |
| <i>PTPN9</i>    | rs13737    | -78.180                 | 75.756  | 0.303   | 75.682                 | 269.557 | 0.779   | -54.059                     | 30.526 | 0.077   |
| <i>HMG20A</i>   | rs1005752  | 18.270                  | 73.110  | 0.803   | -104.704               | 260.843 | 0.688   | -10.958                     | 29.635 | 0.712   |
| <i>AP3S2</i>    | rs4932265  | -51.015                 | 76.936  | 0.508   | -166.285               | 273.627 | 0.544   | -15.596                     | 31.192 | 0.617   |



| Locus         | Variant    | 1- hour Insulin (pg/ml) |         |         | Oral Disposition Index |         |         | Stumvoll 1st Phase Estimate |        |         |
|---------------|------------|-------------------------|---------|---------|------------------------|---------|---------|-----------------------------|--------|---------|
|               |            | beta                    | SE      | p-value | beta                   | SE      | p-value | beta                        | SE     | p-value |
| <i>PRC1</i>   | rs12910825 | -23.302                 | 68.570  | 0.734   | 78.611                 | 244.510 | 0.748   | 9.050                       | 27.748 | 0.744   |
| <i>ITFG3</i>  | rs6600191  | -8.529                  | 86.636  | 0.922   | -469.982               | 306.246 | 0.125   | 28.431                      | 34.969 | 0.417   |
| <i>CLUAP1</i> | rs3751837  | 82.438                  | 85.266  | 0.334   | -37.498                | 304.303 | 0.902   | 42.763                      | 34.646 | 0.218   |
| <i>ATP2A1</i> | rs8046545  | -12.788                 | 71.579  | 0.858   | -47.619                | 254.229 | 0.851   | -15.617                     | 28.997 | 0.590   |
| <i>FAM57B</i> | rs11642430 | 16.648                  | 70.302  | 0.813   | -407.223               | 248.334 | 0.102   | -14.891                     | 28.393 | 0.600   |
| <i>FTO</i>    | rs1421085  | -8.879                  | 66.160  | 0.893   | -471.009               | 233.146 | 0.044   | 4.097                       | 26.725 | 0.878   |
| <i>NFAT5</i>  | rs862320   | -209.581                | 67.295  | 0.002   | 416.015                | 240.702 | 0.084   | -37.473                     | 27.419 | 0.172   |
| <i>BCAR1</i>  | rs72802342 | 95.448                  | 130.137 | 0.464   | 728.729                | 460.911 | 0.114   | -5.911                      | 52.744 | 0.911   |
| <i>CMIP</i>   | rs2925979  | -25.999                 | 72.440  | 0.720   | -104.311               | 256.587 | 0.685   | -0.218                      | 29.259 | 0.994   |
| <i>SPG7</i>   | rs12920022 | 135.239                 | 99.027  | 0.173   | -658.713               | 349.754 | 0.060   | 19.902                      | 40.022 | 0.619   |
| <i>ZZEF1</i>  | rs1377807  | 95.963                  | 72.253  | 0.185   | 231.255                | 256.126 | 0.367   | 27.452                      | 29.202 | 0.348   |
| <i>ATP1B2</i> | rs1641523  | 113.538                 | 69.752  | 0.104   | -335.078               | 246.964 | 0.175   | 46.045                      | 28.153 | 0.103   |
| <i>GLP2R</i>  | rs7222481  | 148.713                 | 73.069  | 0.042   | -605.103               | 259.348 | 0.020   | 51.125                      | 29.523 | 0.084   |
| <i>RAI1</i>   | rs4925109  | -44.404                 | 67.510  | 0.511   | -29.525                | 239.750 | 0.902   | -44.458                     | 27.290 | 0.104   |
| <i>NF1</i>    | rs71372253 | 210.228                 | 127.337 | 0.099   | -545.464               | 452.212 | 0.228   | 91.232                      | 51.328 | 0.076   |
| <i>HNF1B</i>  | rs10908278 | -113.416                | 66.739  | 0.090   | 527.508                | 236.253 | 0.026   | -41.412                     | 27.008 | 0.126   |
| <i>MLX</i>    | rs34855406 | -25.408                 | 76.137  | 0.739   | 390.611                | 269.110 | 0.147   | 22.771                      | 30.730 | 0.459   |
| <i>TTLL6</i>  | rs35895680 | 47.074                  | 72.501  | 0.516   | 439.217                | 256.390 | 0.087   | 68.693                      | 29.147 | 0.019   |
| <i>ACE</i>    | rs60276348 | 116.581                 | 85.342  | 0.172   | -444.371               | 301.975 | 0.142   | -38.368                     | 34.484 | 0.266   |
| <i>BPTF</i>   | rs61676547 | -111.590                | 79.612  | 0.162   | 453.462                | 281.822 | 0.108   | 0.469                       | 32.214 | 0.988   |
| <i>LAMA1</i>  | rs7240767  | 17.290                  | 67.306  | 0.797   | 6.243                  | 238.108 | 0.979   | 7.873                       | 27.195 | 0.772   |
| <i>COMMD9</i> | rs62080313 | 31.861                  | 99.136  | 0.748   | 205.567                | 355.523 | 0.563   | 90.252                      | 40.338 | 0.026   |
| <i>TCF4</i>   | rs72926932 | -60.469                 | 126.100 | 0.632   | 646.904                | 446.511 | 0.148   | -64.493                     | 50.785 | 0.205   |
| <i>WDR7</i>   | rs17684074 | 100.309                 | 80.332  | 0.212   | -17.015                | 284.921 | 0.952   | 7.883                       | 32.485 | 0.808   |
| <i>GRP</i>    | rs9957145  | 176.657                 | 94.923  | 0.063   | -269.076               | 337.380 | 0.425   | 15.498                      | 38.524 | 0.688   |
| <i>MC4R</i>   | rs523288   | -14.192                 | 77.521  | 0.855   | -291.736               | 274.149 | 0.288   | -5.855                      | 31.300 | 0.852   |
| <i>BCL2A</i>  | rs12454712 | -87.185                 | 79.846  | 0.275   | -192.055               | 282.923 | 0.498   | -10.002                     | 32.270 | 0.757   |
| <i>UHRF1</i>  | rs7249758  | -176.870                | 82.855  | 0.033   | 101.274                | 294.723 | 0.731   | -75.911                     | 33.455 | 0.024   |
| <i>INSR</i>   | rs75253922 | 143.809                 | 85.548  | 0.093   | 490.049                | 303.040 | 0.106   | 27.258                      | 34.614 | 0.431   |
| <i>MAP2K7</i> | rs4804833  | 100.121                 | 66.972  | 0.135   | -209.840               | 239.729 | 0.382   | 38.895                      | 27.091 | 0.152   |

| Locus              | Variant     | 1- hour Insulin (pg/ml) |         |         | Oral Disposition Index |         |         | Stumvoll 1st Phase Estimate |        |         |
|--------------------|-------------|-------------------------|---------|---------|------------------------|---------|---------|-----------------------------|--------|---------|
|                    |             | beta                    | SE      | p-value | beta                   | SE      | p-value | beta                        | SE     | p-value |
| <i>FARSA</i>       | rs3111316   | 15.392                  | 68.077  | 0.821   | 258.235                | 241.745 | 0.286   | -24.504                     | 27.487 | 0.373   |
| <i>TM6SF2</i>      | rs8107974   | -114.733                | 131.807 | 0.384   | 493.109                | 467.611 | 0.292   | 35.419                      | 53.159 | 0.506   |
| <i>PEPD</i>        | rs10406327  | 66.228                  | 65.913  | 0.315   | -279.292               | 232.834 | 0.231   | 18.445                      | 26.622 | 0.489   |
| <i>TOMM40/APOE</i> | rs429358    | 57.806                  | 104.075 | 0.579   | -203.856               | 367.749 | 0.580   | 28.544                      | 41.974 | 0.497   |
| <i>GIPR</i>        | rs10406431  | -37.214                 | 67.831  | 0.583   | 53.047                 | 241.280 | 0.826   | 2.563                       | 27.428 | 0.926   |
| <i>ZC3H4</i>       | rs3810291   | 7.208                   | 73.252  | 0.922   | -111.855               | 259.275 | 0.666   | 3.805                       | 29.587 | 0.898   |
| <i>NKX2.2</i>      | rs13041756  | -44.453                 | 114.191 | 0.697   | 21.158                 | 404.698 | 0.958   | -18.006                     | 46.053 | 0.696   |
| <i>RALY</i>        | rs2268078   | -26.735                 | 71.639  | 0.709   | -185.766               | 255.957 | 0.468   | 16.321                      | 29.105 | 0.575   |
| <i>EYA2</i>        | rs6063048   | -126.693                | 78.846  | 0.109   | -292.690               | 279.549 | 0.296   | -4.541                      | 31.909 | 0.887   |
| <i>CEBPB</i>       | rs11699802  | -12.717                 | 70.814  | 0.858   | -21.546                | 251.659 | 0.932   | 27.974                      | 28.608 | 0.329   |
| <i>TSHZ2</i>       | rs34454109  | 51.353                  | 81.755  | 0.530   | 132.677                | 291.360 | 0.649   | 15.853                      | 33.017 | 0.631   |
| <i>GNAS</i>        | rs6070625   | -91.933                 | 66.438  | 0.167   | 271.691                | 236.213 | 0.251   | -28.456                     | 26.950 | 0.291   |
| <i>TCEA2</i>       | rs59944054  | -13.631                 | 80.515  | 0.866   | 129.880                | 286.523 | 0.651   | -4.673                      | 32.498 | 0.886   |
| <i>MTMR3/ASCC2</i> | rs6518681   | -84.139                 | 128.581 | 0.513   | 132.391                | 454.209 | 0.771   | 9.678                       | 51.868 | 0.852   |
| <i>YWHAH</i>       | rs117001013 | -48.923                 | 142.494 | 0.731   | 673.583                | 502.328 | 0.180   | -102.637                    | 57.295 | 0.074   |
| <i>EP300</i>       | rs5758223   | -11.459                 | 75.829  | 0.880   | 424.879                | 267.862 | 0.113   | -45.347                     | 30.554 | 0.138   |
| <i>PNPLA3</i>      | rs738408    | -132.690                | 75.508  | 0.079   | -0.512                 | 268.058 | 0.998   | -23.463                     | 30.550 | 0.443   |
| <i>PIM3</i>        | rs1801645   | 103.585                 | 87.358  | 0.236   | 81.878                 | 311.686 | 0.793   | 77.718                      | 35.174 | 0.028   |

| Locus               | Variant     | Stumvoll 1st Phase Estimate (Matsuda adjusted) |        |         | Fasting TNF-Alpha - V2 (pg/ml) |       |         |
|---------------------|-------------|------------------------------------------------|--------|---------|--------------------------------|-------|---------|
|                     |             | beta                                           | SE     | p-value | beta                           | SE    | p-value |
| <i>MACF1</i>        | rs3768321   | 65.647                                         | 28.296 | 0.021   | -0.092                         | 0.093 | 0.323   |
| <i>FAF1</i>         | rs58432198  | -13.762                                        | 37.152 | 0.711   | 0.003                          | 0.120 | 0.978   |
| <i>PATJ</i>         | rs12140153  | -23.326                                        | 41.554 | 0.575   | -0.217                         | 0.135 | 0.109   |
| <i>PTGFRN</i>       | rs1127215   | -43.321                                        | 23.205 | 0.062   | -0.199                         | 0.075 | 0.008   |
| <i>NOTCH2</i>       | rs1493694   | 18.142                                         | 40.049 | 0.651   | -0.013                         | 0.130 | 0.919   |
| <i>SEC16B</i>       | rs539515    | -38.843                                        | 30.599 | 0.205   | -0.085                         | 0.099 | 0.393   |
| <i>DSTYK</i>        | rs12048743  | 8.715                                          | 23.958 | 0.716   | 0.085                          | 0.078 | 0.271   |
| <i>SRGAP2</i>       | rs9430095   | -12.104                                        | 23.067 | 0.600   | -0.072                         | 0.075 | 0.338   |
| <i>PROX1</i>        | rs340874    | -20.033                                        | 23.539 | 0.395   | 0.049                          | 0.076 | 0.519   |
| <i>LYPLAL1</i>      | rs2820446   | 21.392                                         | 26.339 | 0.417   | 0.104                          | 0.085 | 0.225   |
| <i>ABCB10</i>       | rs348330    | -0.914                                         | 24.435 | 0.970   | 0.232                          | 0.079 | 0.003   |
| <i>GNG4</i>         | rs291367    | 36.835                                         | 24.547 | 0.134   | 0.164                          | 0.079 | 0.039   |
| <i>FAM49A</i>       | rs11680058  | 13.392                                         | 34.505 | 0.698   | -0.055                         | 0.114 | 0.626   |
| <i>DTNB</i>         | rs17802463  | 37.925                                         | 25.814 | 0.142   | -0.047                         | 0.084 | 0.575   |
| <i>GCKR</i>         | rs1260326   | 42.604                                         | 22.872 | 0.063   | -0.130                         | 0.074 | 0.081   |
| <i>THADA</i>        | rs80147536  | 1.136                                          | 37.070 | 0.976   | -0.052                         | 0.121 | 0.664   |
| <i>BNIP1</i>        | rs6545714   | 29.799                                         | 23.978 | 0.214   | 0.114                          | 0.078 | 0.144   |
| <i>BCL11A</i>       | rs243024    | -6.619                                         | 23.365 | 0.777   | -0.018                         | 0.076 | 0.814   |
| <i>CEP68</i>        | rs2249105   | 40.069                                         | 24.280 | 0.099   | 0.030                          | 0.079 | 0.702   |
| <i>GLI2</i>         | rs11688682  | 65.748                                         | 28.549 | 0.022   | 0.081                          | 0.093 | 0.387   |
| <i>PABPC1P2</i>     | rs35999103  | 41.021                                         | 29.759 | 0.169   | 0.153                          | 0.098 | 0.117   |
| <i>CYTIP</i>        | rs13426680  | -26.644                                        | 47.039 | 0.571   | 0.163                          | 0.152 | 0.282   |
| <i>RBMS1</i>        | rs3772071   | 0.880                                          | 25.463 | 0.972   | 0.085                          | 0.083 | 0.304   |
| <i>GRB14/COBLL1</i> | rs10195252  | -16.543                                        | 24.951 | 0.508   | -0.021                         | 0.082 | 0.794   |
| <i>G6PC2</i>        | rs1402837   | 0.334                                          | 26.538 | 0.990   | -0.062                         | 0.086 | 0.472   |
| <i>CRYBA2</i>       | rs113414093 | 34.490                                         | 91.791 | 0.707   | 0.711                          | 0.292 | 0.015   |
| <i>IRS1</i>         | rs2972144   | 14.597                                         | 25.124 | 0.561   | 0.052                          | 0.082 | 0.529   |
| <i>PPARG</i>        | rs11709077  | -25.189                                        | 37.438 | 0.501   | -0.265                         | 0.122 | 0.030   |

| Locus          | Variant    | Stumvoll 1st Phase Estimate (Matsuda adjusted) |        |         | Fasting TNF-Alpha - V2 (pg/ml) |       |         |
|----------------|------------|------------------------------------------------|--------|---------|--------------------------------|-------|---------|
|                |            | beta                                           | SE     | p-value | beta                           | SE    | p-value |
| <i>UBE2E2</i>  | rs35352848 | -20.399                                        | 27.983 | 0.466   | 0.044                          | 0.091 | 0.628   |
| <i>KIF9</i>    | rs11926707 | 8.513                                          | 23.373 | 0.716   | -0.016                         | 0.079 | 0.842   |
| <i>RBM6</i>    | rs4688760  | -14.602                                        | 25.888 | 0.573   | 0.080                          | 0.084 | 0.339   |
| <i>RFT1</i>    | rs2581787  | -15.508                                        | 23.342 | 0.507   | -0.024                         | 0.076 | 0.753   |
| <i>PSMD6</i>   | rs3774723  | -63.541                                        | 31.991 | 0.047   | -0.165                         | 0.104 | 0.113   |
| <i>ADAMTS9</i> | rs9860730  | -44.564                                        | 24.320 | 0.067   | -0.008                         | 0.080 | 0.916   |
| <i>SHQ1</i>    | rs13085136 | 12.227                                         | 60.106 | 0.839   | 0.164                          | 0.193 | 0.396   |
| <i>ROBO2</i>   | rs2272163  | -10.624                                        | 23.875 | 0.656   | -0.036                         | 0.077 | 0.644   |
| <i>ADCY5</i>   | rs11708067 | -6.559                                         | 28.518 | 0.818   | 0.048                          | 0.092 | 0.600   |
| <i>SLC12A8</i> | rs649961   | 17.538                                         | 23.238 | 0.451   | 0.057                          | 0.076 | 0.449   |
| <i>TMCC1</i>   | rs9828772  | 30.699                                         | 42.538 | 0.471   | -0.074                         | 0.137 | 0.590   |
| <i>TSC22D2</i> | rs62271373 | 50.167                                         | 41.963 | 0.232   | 0.005                          | 0.136 | 0.969   |
| <i>MBNL1</i>   | rs13065698 | 9.526                                          | 24.215 | 0.694   | 0.106                          | 0.079 | 0.180   |
| <i>EGFEM1P</i> | rs7629630  | 7.225                                          | 32.927 | 0.826   | 0.026                          | 0.107 | 0.805   |
| <i>SLC2A2</i>  | rs9873618  | 20.729                                         | 25.850 | 0.423   | -0.032                         | 0.084 | 0.698   |
| <i>ABCC5</i>   | rs2872246  | -22.642                                        | 22.557 | 0.316   | 0.018                          | 0.073 | 0.805   |
| <i>IGF2BP2</i> | rs6780171  | -39.276                                        | 25.351 | 0.122   | -0.093                         | 0.083 | 0.262   |
| <i>ST6GAL1</i> | rs3887925  | -13.710                                        | 23.413 | 0.558   | -0.116                         | 0.076 | 0.127   |
| <i>LPP</i>     | rs4686471  | 13.348                                         | 24.187 | 0.581   | 0.009                          | 0.078 | 0.907   |
| <i>MAEA</i>    | rs56337234 | 33.478                                         | 25.746 | 0.194   | 0.016                          | 0.084 | 0.846   |
| <i>HTT</i>     | rs362307   | -3.682                                         | 47.359 | 0.938   | -0.188                         | 0.150 | 0.210   |
| <i>WFS1</i>    | rs10937721 | -14.797                                        | 23.538 | 0.530   | -0.032                         | 0.077 | 0.675   |
| <i>LCORL</i>   | rs12640250 | 4.766                                          | 27.090 | 0.860   | -0.001                         | 0.088 | 0.993   |
| <i>GNPDA2</i>  | rs10938398 | -7.272                                         | 23.412 | 0.756   | 0.055                          | 0.076 | 0.473   |
| <i>USP46</i>   | rs2102278  | -10.325                                        | 25.658 | 0.688   | -0.025                         | 0.083 | 0.761   |
| <i>SCD5</i>    | rs12642790 | 29.172                                         | 24.979 | 0.243   | 0.000                          | 0.081 | 0.996   |
| <i>FAM13A</i>  | rs1903002  | -7.858                                         | 23.729 | 0.741   | 0.052                          | 0.077 | 0.499   |
| <i>SMARCA1</i> | rs6821438  | -35.058                                        | 23.860 | 0.142   | 0.128                          | 0.077 | 0.100   |
| <i>SLC9B1</i>  | rs1580278  | -8.330                                         | 23.972 | 0.728   | -0.021                         | 0.078 | 0.790   |
| <i>PABPC4L</i> | rs1296328  | -54.674                                        | 24.346 | 0.025   | -0.216                         | 0.079 | 0.006   |

| Locus          | Variant    | Stumvoll 1st Phase Estimate (Matsuda adjusted) |        |         | Fasting TNF-Alpha - V2 (pg/ml) |       |         |
|----------------|------------|------------------------------------------------|--------|---------|--------------------------------|-------|---------|
|                |            | beta                                           | SE     | p-value | beta                           | SE    | p-value |
| <i>TMEM154</i> | rs7669833  | -27.012                                        | 25.178 | 0.284   | 0.134                          | 0.082 | 0.103   |
| <i>PDGFC</i>   | rs28819812 | -42.532                                        | 24.800 | 0.087   | 0.076                          | 0.081 | 0.350   |
| <i>ACSL1</i>   | rs58730668 | 15.084                                         | 34.460 | 0.662   | -0.003                         | 0.113 | 0.976   |
| <i>MRPS30</i>  | rs6884702  | -28.244                                        | 23.712 | 0.234   | -0.070                         | 0.077 | 0.367   |
| <i>ITGA1</i>   | rs3811978  | 76.669                                         | 31.524 | 0.015   | 0.217                          | 0.101 | 0.033   |
| <i>ARL15</i>   | rs702634   | 3.089                                          | 25.627 | 0.904   | 0.041                          | 0.083 | 0.622   |
| <i>ANKRD55</i> | rs465002   | 10.759                                         | 25.829 | 0.677   | 0.007                          | 0.084 | 0.938   |
| <i>PIK3R1</i>  | rs4976033  | -10.296                                        | 23.075 | 0.656   | 0.055                          | 0.074 | 0.463   |
| <i>POC5</i>    | rs2307111  | 5.571                                          | 23.027 | 0.809   | -0.010                         | 0.075 | 0.894   |
| <i>ZBED3</i>   | rs4457053  | -26.144                                        | 25.512 | 0.306   | -0.045                         | 0.082 | 0.581   |
| <i>DMGDH</i>   | rs1316776  | -2.838                                         | 24.925 | 0.909   | 0.008                          | 0.081 | 0.924   |
| <i>RASA1</i>   | rs7719891  | -53.027                                        | 24.806 | 0.033   | -0.006                         | 0.081 | 0.942   |
| <i>PCSK1</i>   | rs13179048 | -17.076                                        | 24.742 | 0.490   | -0.020                         | 0.081 | 0.805   |
| <i>PHF15</i>   | rs329122   | 35.673                                         | 24.420 | 0.145   | 0.272                          | 0.079 | 0.001   |
| <i>EBF1</i>    | rs3934712  | 22.192                                         | 28.264 | 0.433   | -0.009                         | 0.091 | 0.924   |
| <i>RREB1</i>   | rs9379084  | -0.738                                         | 37.850 | 0.984   | 0.025                          | 0.124 | 0.838   |
| <i>CDKAL1</i>  | rs7756992  | -36.506                                        | 25.978 | 0.160   | 0.071                          | 0.084 | 0.402   |
| <i>MHC</i>     | rs601945   | -5.848                                         | 34.742 | 0.866   | -0.178                         | 0.113 | 0.115   |
| <i>LRFN2</i>   | rs34298980 | 11.604                                         | 24.995 | 0.643   | -0.153                         | 0.081 | 0.059   |
| <i>VEGFA</i>   | rs6458354  | -3.632                                         | 26.384 | 0.891   | 0.052                          | 0.085 | 0.541   |
| <i>TFAP2B</i>  | rs3798519  | 8.643                                          | 30.338 | 0.776   | 0.035                          | 0.099 | 0.721   |
| <i>BEND3</i>   | rs4946812  | -24.672                                        | 26.332 | 0.349   | -0.019                         | 0.085 | 0.823   |
| <i>CENPW</i>   | rs11759026 | 32.452                                         | 28.417 | 0.254   | -0.090                         | 0.093 | 0.336   |
| <i>SOGA3</i>   | rs2800733  | -12.893                                        | 26.402 | 0.625   | 0.071                          | 0.085 | 0.406   |
| <i>SLC35D3</i> | rs9494624  | -51.537                                        | 26.480 | 0.052   | -0.007                         | 0.086 | 0.934   |
| <i>MIR3668</i> | rs2982521  | 18.212                                         | 24.308 | 0.454   | -0.183                         | 0.078 | 0.020   |
| <i>SLC22A3</i> | rs474513   | 13.653                                         | 23.539 | 0.562   | -0.034                         | 0.076 | 0.655   |
| <i>QKI</i>     | rs4709746  | 16.837                                         | 33.940 | 0.620   | 0.106                          | 0.110 | 0.337   |
| <i>DGKB</i>    | rs10228066 | -5.861                                         | 23.668 | 0.805   | -0.022                         | 0.076 | 0.775   |
| <i>IGF2BP3</i> | rs4279506  | 21.887                                         | 23.550 | 0.353   | -0.097                         | 0.076 | 0.204   |

| Locus    | Variant    | Stumvoll 1st Phase Estimate (Matsuda adjusted) |        |         | Fasting TNF-Alpha - V2 (pg/ml) |       |         |
|----------|------------|------------------------------------------------|--------|---------|--------------------------------|-------|---------|
|          |            | beta                                           | SE     | p-value | beta                           | SE    | p-value |
| JAZF1    | rs1708302  | -20.286                                        | 22.963 | 0.377   | -0.080                         | 0.075 | 0.287   |
| CRHR2    | rs917195   | -37.334                                        | 27.427 | 0.174   | 0.100                          | 0.089 | 0.257   |
| GCK      | rs878521   | -32.109                                        | 26.689 | 0.229   | -0.105                         | 0.086 | 0.227   |
| FBXL13   | rs11496066 | -75.353                                        | 30.513 | 0.014   | -0.151                         | 0.099 | 0.129   |
| RELN     | rs39328    | -4.066                                         | 24.037 | 0.866   | 0.072                          | 0.078 | 0.357   |
| CTTNBP2  | rs6976111  | -42.383                                        | 25.647 | 0.099   | 0.048                          | 0.083 | 0.567   |
| KLF14    | rs1562396  | 28.609                                         | 25.798 | 0.268   | 0.056                          | 0.084 | 0.507   |
| AOC1     | rs62492368 | 22.283                                         | 25.144 | 0.376   | 0.063                          | 0.082 | 0.442   |
| MNX1     | rs6459733  | 23.837                                         | 23.454 | 0.310   | 0.027                          | 0.076 | 0.725   |
| PPP1R3B  | rs4841132  | 71.624                                         | 45.510 | 0.116   | 0.100                          | 0.146 | 0.491   |
| MSRA     | rs17689007 | 31.650                                         | 22.575 | 0.161   | -0.023                         | 0.073 | 0.749   |
| XKR6     | rs57327348 | -16.577                                        | 32.030 | 0.605   | -0.006                         | 0.104 | 0.958   |
| LPL      | rs10096633 | -25.573                                        | 34.316 | 0.456   | 0.149                          | 0.111 | 0.181   |
| PURG     | rs10954772 | 28.377                                         | 25.188 | 0.260   | -0.092                         | 0.081 | 0.259   |
| ANK1     | rs13262861 | 22.063                                         | 29.030 | 0.448   | 0.053                          | 0.093 | 0.568   |
| TP53INP1 | rs10097617 | -18.934                                        | 23.491 | 0.421   | -0.104                         | 0.076 | 0.173   |
| TRHR     | rs12680028 | 6.142                                          | 23.279 | 0.792   | 0.029                          | 0.076 | 0.700   |
| SLC30A8  | rs3802177  | -33.991                                        | 25.920 | 0.190   | -0.088                         | 0.084 | 0.295   |
| CASC11   | rs17772814 | 25.449                                         | 43.563 | 0.559   | 0.113                          | 0.143 | 0.427   |
| PVT1     | rs1561927  | -21.815                                        | 25.559 | 0.394   | 0.080                          | 0.083 | 0.338   |
| BOP1     | rs4977213  | -3.121                                         | 23.412 | 0.894   | 0.043                          | 0.076 | 0.566   |
| GLIS3    | rs10974438 | -9.144                                         | 24.471 | 0.709   | 0.029                          | 0.079 | 0.712   |
| HAUS6    | rs7022807  | 11.198                                         | 23.971 | 0.641   | 0.068                          | 0.077 | 0.381   |
| FOCAD    | rs7867635  | -27.145                                        | 23.889 | 0.256   | 0.118                          | 0.078 | 0.128   |
| CDKN2A/B | rs10811660 | -20.094                                        | 31.998 | 0.530   | -0.188                         | 0.105 | 0.073   |
| LINGO2   | rs1412234  | -2.555                                         | 25.057 | 0.919   | 0.023                          | 0.082 | 0.781   |
| UBAP2    | rs12001437 | -15.612                                        | 23.453 | 0.506   | 0.004                          | 0.076 | 0.962   |
| MTND2P8  | rs11137820 | 38.106                                         | 23.130 | 0.100   | -0.059                         | 0.075 | 0.434   |
| TLE4     | rs17791513 | 28.011                                         | 50.613 | 0.580   | 0.163                          | 0.164 | 0.321   |
| TLE1     | rs2796441  | -14.799                                        | 22.690 | 0.515   | -0.010                         | 0.074 | 0.888   |

| Locus                | Variant    | Stumvoll 1st Phase Estimate (Matsuda adjusted) |        |         | Fasting TNF-Alpha - V2 (pg/ml) |       |         |
|----------------------|------------|------------------------------------------------|--------|---------|--------------------------------|-------|---------|
|                      |            | beta                                           | SE     | p-value | beta                           | SE    | p-value |
| <i>ZNF169</i>        | rs55653563 | 25.194                                         | 26.015 | 0.333   | 0.034                          | 0.085 | 0.689   |
| <i>ABO</i>           | rs505922   | -52.761                                        | 23.901 | 0.028   | -0.167                         | 0.078 | 0.032   |
| <i>GPSM1</i>         | rs28505901 | -23.010                                        | 29.692 | 0.439   | 0.029                          | 0.096 | 0.765   |
| <i>CDC123/CAMK1D</i> | rs11257655 | -58.056                                        | 29.162 | 0.047   | -0.006                         | 0.095 | 0.953   |
| <i>HKDC1</i>         | rs4746822  | -40.673                                        | 24.169 | 0.093   | -0.037                         | 0.079 | 0.635   |
| <i>NEUROG3</i>       | rs2642588  | 28.746                                         | 25.297 | 0.256   | 0.037                          | 0.082 | 0.651   |
| <i>ZMIZ1</i>         | rs703972   | 17.531                                         | 24.326 | 0.471   | -0.055                         | 0.079 | 0.489   |
| <i>PTEN</i>          | rs11202627 | -7.351                                         | 32.700 | 0.822   | 0.264                          | 0.105 | 0.013   |
| <i>HHEX/IDE</i>      | rs10882101 | 17.815                                         | 23.385 | 0.446   | 0.169                          | 0.076 | 0.026   |
| <i>TCF7L2</i>        | rs7903146  | -34.181                                        | 24.321 | 0.160   | -0.048                         | 0.079 | 0.547   |
| <i>WDR11</i>         | rs72631105 | -10.616                                        | 31.076 | 0.733   | -0.055                         | 0.101 | 0.586   |
| <i>PLEKHA1</i>       | rs2280141  | -33.745                                        | 23.590 | 0.153   | 0.061                          | 0.076 | 0.428   |
| <i>INS/IGF2</i>      | rs4929965  | 49.752                                         | 23.778 | 0.037   | 0.003                          | 0.077 | 0.968   |
| <i>KCNQ1</i>         | rs2237895  | -51.867                                        | 22.525 | 0.022   | -0.056                         | 0.073 | 0.441   |
| <i>KCNJ11</i>        | rs5213     | -43.379                                        | 25.478 | 0.089   | 0.007                          | 0.082 | 0.933   |
| <i>METTL15</i>       | rs4923543  | 38.154                                         | 25.492 | 0.135   | -0.024                         | 0.083 | 0.777   |
| <i>PDHX</i>          | rs2767036  | -54.157                                        | 25.381 | 0.033   | -0.043                         | 0.083 | 0.604   |
| <i>HSD17B12</i>      | rs1061810  | -12.084                                        | 26.097 | 0.644   | 0.145                          | 0.084 | 0.086   |
| <i>CRY2</i>          | rs7115753  | -6.225                                         | 23.852 | 0.794   | -0.054                         | 0.077 | 0.484   |
| <i>CELF1</i>         | rs7124681  | -54.177                                        | 22.613 | 0.017   | 0.082                          | 0.074 | 0.268   |
| <i>MAP3K11</i>       | rs1783541  | 3.655                                          | 31.162 | 0.907   | -0.098                         | 0.101 | 0.335   |
| <i>CENTD2/ARAP1</i>  | rs77464186 | 24.921                                         | 33.100 | 0.452   | -0.030                         | 0.107 | 0.779   |
| <i>MTNR1B</i>        | rs10830963 | -57.268                                        | 26.049 | 0.028   | -0.018                         | 0.085 | 0.829   |
| <i>ETS1</i>          | rs67232546 | -47.833                                        | 27.833 | 0.086   | -0.137                         | 0.091 | 0.130   |
| <i>CDKN1B</i>        | rs2066827  | -126.228                                       | 35.718 | 0.000   | -0.275                         | 0.117 | 0.019   |
| <i>ITPR2</i>         | rs718314   | 17.368                                         | 26.827 | 0.518   | -0.081                         | 0.087 | 0.354   |
| <i>KLHDC5</i>        | rs10842994 | -15.802                                        | 28.369 | 0.578   | -0.011                         | 0.092 | 0.904   |
| <i>HMGA2</i>         | rs2258238  | -9.990                                         | 36.665 | 0.785   | -0.103                         | 0.119 | 0.387   |
| <i>TSPAN8/LGR5</i>   | rs1796330  | 5.974                                          | 23.832 | 0.802   | 0.040                          | 0.077 | 0.604   |
| <i>USP44</i>         | rs2197973  | 23.182                                         | 22.913 | 0.312   | -0.011                         | 0.074 | 0.878   |

| Locus           | Variant    | Stumvoll 1st Phase Estimate (Matsuda adjusted) |        |         | Fasting TNF-Alpha - V2 (pg/ml) |       |         |
|-----------------|------------|------------------------------------------------|--------|---------|--------------------------------|-------|---------|
|                 |            | beta                                           | SE     | p-value | beta                           | SE    | p-value |
| <i>RMST</i>     | rs77864822 | -5.412                                         | 47.337 | 0.909   | 0.004                          | 0.154 | 0.978   |
| <i>WSCD2</i>    | rs1426371  | -15.794                                        | 29.192 | 0.589   | 0.062                          | 0.095 | 0.516   |
| <i>KSR2</i>     | rs34965774 | -14.722                                        | 33.742 | 0.663   | -0.120                         | 0.110 | 0.275   |
| <i>HNF1A</i>    | rs56348580 | -14.598                                        | 25.596 | 0.569   | 0.070                          | 0.083 | 0.400   |
| <i>MPHOSPH9</i> | rs4148856  | 21.625                                         | 26.512 | 0.415   | 0.141                          | 0.086 | 0.100   |
| <i>ZNF664</i>   | rs7978610  | -39.483                                        | 23.892 | 0.099   | -0.055                         | 0.078 | 0.480   |
| <i>FBRSL1</i>   | rs12811407 | 14.670                                         | 25.374 | 0.563   | -0.025                         | 0.083 | 0.765   |
| <i>RNF6</i>     | rs34584161 | 10.405                                         | 26.425 | 0.694   | 0.006                          | 0.086 | 0.940   |
| <i>HMGB1</i>    | rs11842871 | -11.954                                        | 28.933 | 0.680   | -0.025                         | 0.093 | 0.791   |
| <i>KL</i>       | rs576674   | 19.205                                         | 29.125 | 0.510   | -0.072                         | 0.094 | 0.443   |
| <i>DLEU1</i>    | rs963740   | 25.327                                         | 25.776 | 0.326   | 0.125                          | 0.084 | 0.136   |
| <i>PCDH17</i>   | rs9537803  | -7.645                                         | 26.259 | 0.771   | 0.045                          | 0.085 | 0.598   |
| <i>SRGAP2D</i>  | rs9563615  | -24.371                                        | 26.489 | 0.358   | -0.006                         | 0.086 | 0.943   |
| <i>SPRY2</i>    | rs1359790  | 2.219                                          | 25.805 | 0.932   | -0.021                         | 0.084 | 0.800   |
| <i>IRS2</i>     | rs7987740  | 56.579                                         | 24.255 | 0.020   | 0.017                          | 0.079 | 0.830   |
| <i>SLC7A7</i>   | rs17122772 | -23.466                                        | 29.945 | 0.434   | -0.019                         | 0.097 | 0.841   |
| <i>AKAP6</i>    | rs17522122 | -28.705                                        | 23.232 | 0.217   | 0.027                          | 0.076 | 0.717   |
| <i>CLEC14A</i>  | rs8017808  | 5.168                                          | 25.707 | 0.841   | 0.065                          | 0.084 | 0.435   |
| <i>NRXN3</i>    | rs17836088 | -21.087                                        | 28.633 | 0.462   | 0.003                          | 0.093 | 0.975   |
| <i>SMEK1</i>    | rs8010382  | 1.561                                          | 24.826 | 0.950   | 0.036                          | 0.080 | 0.655   |
| <i>MARK3</i>    | rs62007683 | 31.644                                         | 24.035 | 0.189   | 0.019                          | 0.078 | 0.808   |
| <i>RASGRP1</i>  | rs34715063 | 33.235                                         | 36.189 | 0.359   | -0.064                         | 0.117 | 0.585   |
| <i>LTK</i>      | rs11070332 | -27.816                                        | 23.454 | 0.236   | -0.012                         | 0.076 | 0.869   |
| <i>ONECUT1</i>  | rs2456530  | -31.978                                        | 36.268 | 0.378   | 0.015                          | 0.117 | 0.896   |
| <i>C2CD4A/B</i> | rs8037894  | -21.717                                        | 23.191 | 0.349   | 0.070                          | 0.076 | 0.358   |
| <i>USP3</i>     | rs7178762  | -24.428                                        | 23.319 | 0.295   | -0.021                         | 0.076 | 0.783   |
| <i>MAP2K5</i>   | rs4776970  | 33.346                                         | 23.809 | 0.162   | 0.050                          | 0.077 | 0.517   |
| <i>PTPN9</i>    | rs13737    | -52.348                                        | 26.278 | 0.047   | -0.059                         | 0.085 | 0.488   |
| <i>HMG20A</i>   | rs1005752  | -8.987                                         | 25.518 | 0.725   | -0.030                         | 0.083 | 0.718   |
| <i>AP3S2</i>    | rs4932265  | -17.660                                        | 26.765 | 0.510   | 0.038                          | 0.087 | 0.663   |



| Locus         | Variant    | Stumvoll 1st Phase Estimate (Matsuda adjusted) |        |         | Fasting TNF-Alpha - V2 (pg/ml) |       |         |
|---------------|------------|------------------------------------------------|--------|---------|--------------------------------|-------|---------|
|               |            | beta                                           | SE     | p-value | beta                           | SE    | p-value |
| <i>PRC1</i>   | rs12910825 | 16.298                                         | 23.915 | 0.496   | 0.004                          | 0.077 | 0.963   |
| <i>ITFG3</i>  | rs6600191  | -2.934                                         | 30.101 | 0.922   | -0.043                         | 0.098 | 0.662   |
| <i>CLUAP1</i> | rs3751837  | 25.066                                         | 29.774 | 0.400   | -0.126                         | 0.096 | 0.190   |
| <i>ATP2A1</i> | rs8046545  | -9.410                                         | 24.871 | 0.705   | 0.006                          | 0.081 | 0.942   |
| <i>FAM57B</i> | rs11642430 | -30.365                                        | 24.340 | 0.213   | 0.015                          | 0.079 | 0.846   |
| <i>FTO</i>    | rs1421085  | -19.739                                        | 22.937 | 0.390   | 0.122                          | 0.074 | 0.101   |
| <i>NFAT5</i>  | rs862320   | -14.463                                        | 23.660 | 0.541   | -0.058                         | 0.076 | 0.450   |
| <i>BCAR1</i>  | rs72802342 | 29.320                                         | 45.235 | 0.517   | -0.046                         | 0.148 | 0.753   |
| <i>CMIP</i>   | rs2925979  | -8.230                                         | 25.106 | 0.743   | -0.103                         | 0.082 | 0.210   |
| <i>SPG7</i>   | rs12920022 | -16.636                                        | 34.405 | 0.629   | 0.122                          | 0.111 | 0.271   |
| <i>ZZEF1</i>  | rs1377807  | 34.490                                         | 25.036 | 0.169   | -0.007                         | 0.082 | 0.934   |
| <i>ATP1B2</i> | rs1641523  | 31.922                                         | 24.181 | 0.187   | 0.010                          | 0.079 | 0.900   |
| <i>GLP2R</i>  | rs7222481  | 20.758                                         | 25.573 | 0.417   | 0.070                          | 0.083 | 0.397   |
| <i>RAI1</i>   | rs4925109  | -43.138                                        | 23.382 | 0.066   | -0.005                         | 0.076 | 0.949   |
| <i>NF1</i>    | rs71372253 | 40.110                                         | 44.414 | 0.367   | 0.400                          | 0.142 | 0.005   |
| <i>HNF1B</i>  | rs10908278 | -8.943                                         | 23.327 | 0.702   | -0.029                         | 0.076 | 0.707   |
| <i>MLX</i>    | rs34855406 | 29.234                                         | 26.351 | 0.268   | 0.017                          | 0.086 | 0.843   |
| <i>TTLL6</i>  | rs35895680 | 85.266                                         | 24.907 | 0.001   | 0.075                          | 0.081 | 0.357   |
| <i>ACE</i>    | rs60276348 | -60.927                                        | 29.522 | 0.040   | -0.083                         | 0.096 | 0.387   |
| <i>BPTF</i>   | rs61676547 | 34.527                                         | 27.697 | 0.213   | -0.024                         | 0.090 | 0.794   |
| <i>LAMA1</i>  | rs7240767  | 11.564                                         | 23.288 | 0.620   | -0.087                         | 0.076 | 0.250   |
| <i>COMMD9</i> | rs62080313 | 92.697                                         | 34.565 | 0.008   | 0.225                          | 0.113 | 0.047   |
| <i>TCF4</i>   | rs72926932 | -20.726                                        | 43.860 | 0.637   | 0.286                          | 0.141 | 0.042   |
| <i>WDR7</i>   | rs17684074 | 11.127                                         | 27.869 | 0.690   | -0.001                         | 0.091 | 0.988   |
| <i>GRP</i>    | rs9957145  | 3.533                                          | 33.034 | 0.915   | 0.017                          | 0.108 | 0.873   |
| <i>MC4R</i>   | rs523288   | -13.850                                        | 26.843 | 0.606   | -0.004                         | 0.087 | 0.959   |
| <i>BCL2A</i>  | rs12454712 | -24.684                                        | 27.689 | 0.373   | -0.008                         | 0.090 | 0.926   |
| <i>UHRF1</i>  | rs7249758  | -58.322                                        | 28.755 | 0.043   | -0.172                         | 0.094 | 0.066   |
| <i>INSR</i>   | rs75253922 | 41.139                                         | 29.678 | 0.166   | 0.253                          | 0.096 | 0.009   |
| <i>MAP2K7</i> | rs4804833  | 24.650                                         | 23.303 | 0.291   | 0.015                          | 0.077 | 0.850   |

| Locus              | Variant     | Stumvoll 1st Phase Estimate (Matsuda adjusted) |        |         | Fasting TNF-Alpha - V2 (pg/ml) |       |         |
|--------------------|-------------|------------------------------------------------|--------|---------|--------------------------------|-------|---------|
|                    |             | beta                                           | SE     | p-value | beta                           | SE    | p-value |
| <i>FARSA</i>       | rs3111316   | -12.441                                        | 23.682 | 0.600   | -0.023                         | 0.077 | 0.768   |
| <i>TM6SF2</i>      | rs8107974   | 78.533                                         | 45.756 | 0.087   | 0.409                          | 0.149 | 0.006   |
| <i>PEPD</i>        | rs10406327  | 1.982                                          | 22.834 | 0.931   | -0.040                         | 0.074 | 0.590   |
| <i>TOMM40/APOE</i> | rs429358    | 16.256                                         | 35.989 | 0.652   | 0.133                          | 0.117 | 0.255   |
| <i>GIPR</i>        | rs10406431  | 7.928                                          | 23.604 | 0.737   | 0.064                          | 0.076 | 0.402   |
| <i>ZC3H4</i>       | rs3810291   | 9.921                                          | 25.367 | 0.696   | 0.030                          | 0.082 | 0.717   |
| <i>NKX2.2</i>      | rs13041756  | -10.639                                        | 39.589 | 0.788   | -0.132                         | 0.128 | 0.305   |
| <i>RALY</i>        | rs2268078   | 9.708                                          | 25.051 | 0.699   | -0.055                         | 0.081 | 0.499   |
| <i>EYA2</i>        | rs6063048   | -5.837                                         | 27.373 | 0.831   | 0.140                          | 0.089 | 0.117   |
| <i>CEBPB</i>       | rs11699802  | 26.289                                         | 24.593 | 0.286   | 0.012                          | 0.080 | 0.882   |
| <i>TSHZ2</i>       | rs34454109  | 14.394                                         | 28.500 | 0.614   | 0.108                          | 0.092 | 0.243   |
| <i>GNAS</i>        | rs6070625   | -11.957                                        | 23.159 | 0.606   | 0.019                          | 0.075 | 0.801   |
| <i>TCEA2</i>       | rs59944054  | 9.035                                          | 28.046 | 0.747   | 0.025                          | 0.090 | 0.777   |
| <i>MTMR3/ASCC2</i> | rs6518681   | 29.422                                         | 44.437 | 0.508   | -0.227                         | 0.144 | 0.116   |
| <i>YWHAH</i>       | rs117001013 | -46.877                                        | 49.330 | 0.342   | -0.036                         | 0.163 | 0.824   |
| <i>EP300</i>       | rs5758223   | -18.922                                        | 26.313 | 0.472   | -0.029                         | 0.086 | 0.732   |
| <i>PNPLA3</i>      | rs738408    | -17.625                                        | 26.216 | 0.502   | -0.050                         | 0.085 | 0.554   |
| <i>PIM3</i>        | rs1801645   | 71.954                                         | 30.344 | 0.018   | 0.045                          | 0.099 | 0.650   |

| Locus               | Variant     | Fasting TNF-Alpha (adj BMI)- V2 (pg/ml) |       |         | Total Cholesterol - V2 (mmol/l) |       |         |
|---------------------|-------------|-----------------------------------------|-------|---------|---------------------------------|-------|---------|
|                     |             | beta                                    | SE    | p-value | beta                            | SE    | p-value |
| <i>MACF1</i>        | rs3768321   | -0.062                                  | 0.092 | 0.498   | 0.133                           | 0.082 | 0.105   |
| <i>FAF1</i>         | rs58432198  | -0.012                                  | 0.118 | 0.918   | 0.024                           | 0.105 | 0.816   |
| <i>PATJ</i>         | rs12140153  | -0.223                                  | 0.134 | 0.096   | 0.082                           | 0.119 | 0.493   |
| <i>PTGFRN</i>       | rs1127215   | -0.197                                  | 0.074 | 0.008   | 0.070                           | 0.066 | 0.291   |
| <i>NOTCH2</i>       | rs1493694   | -0.045                                  | 0.130 | 0.728   | -0.237                          | 0.114 | 0.038   |
| <i>SEC16B</i>       | rs539515    | -0.111                                  | 0.098 | 0.262   | 0.063                           | 0.087 | 0.466   |
| <i>DSTYK</i>        | rs12048743  | 0.088                                   | 0.077 | 0.253   | 0.017                           | 0.068 | 0.804   |
| <i>SRGAP2</i>       | rs9430095   | -0.078                                  | 0.074 | 0.295   | -0.066                          | 0.065 | 0.310   |
| <i>PROX1</i>        | rs340874    | 0.074                                   | 0.076 | 0.329   | 0.091                           | 0.067 | 0.172   |
| <i>LYPLAL1</i>      | rs2820446   | 0.094                                   | 0.084 | 0.268   | 0.058                           | 0.075 | 0.440   |
| <i>ABCB10</i>       | rs348330    | 0.222                                   | 0.078 | 0.005   | -0.134                          | 0.069 | 0.052   |
| <i>GNG4</i>         | rs291367    | 0.169                                   | 0.078 | 0.031   | 0.035                           | 0.070 | 0.614   |
| <i>FAM49A</i>       | rs11680058  | -0.042                                  | 0.112 | 0.705   | -0.040                          | 0.098 | 0.687   |
| <i>DTNB</i>         | rs17802463  | -0.049                                  | 0.083 | 0.556   | 0.071                           | 0.074 | 0.339   |
| <i>GCKR</i>         | rs1260326   | -0.149                                  | 0.074 | 0.043   | 0.038                           | 0.065 | 0.565   |
| <i>THADA</i>        | rs80147536  | -0.035                                  | 0.119 | 0.770   | -0.054                          | 0.105 | 0.610   |
| <i>BNIP1</i>        | rs6545714   | 0.097                                   | 0.077 | 0.207   | 0.009                           | 0.068 | 0.898   |
| <i>BCL11A</i>       | rs243024    | 0.000                                   | 0.075 | 0.999   | -0.101                          | 0.066 | 0.129   |
| <i>CEP68</i>        | rs2249105   | 0.006                                   | 0.078 | 0.942   | 0.021                           | 0.069 | 0.758   |
| <i>GLI2</i>         | rs11688682  | 0.059                                   | 0.093 | 0.526   | -0.116                          | 0.081 | 0.154   |
| <i>PABPC1P2</i>     | rs35999103  | 0.130                                   | 0.097 | 0.179   | -0.070                          | 0.085 | 0.409   |
| <i>CYTIP</i>        | rs13426680  | 0.162                                   | 0.150 | 0.281   | 0.115                           | 0.134 | 0.391   |
| <i>RBMS1</i>        | rs3772071   | 0.099                                   | 0.082 | 0.227   | -0.017                          | 0.073 | 0.813   |
| <i>GRB14/COBLL1</i> | rs10195252  | -0.019                                  | 0.080 | 0.816   | 0.061                           | 0.071 | 0.389   |
| <i>G6PC2</i>        | rs1402837   | -0.072                                  | 0.086 | 0.398   | -0.096                          | 0.076 | 0.205   |
| <i>CRYBA2</i>       | rs113414093 | 0.633                                   | 0.295 | 0.033   | -0.151                          | 0.262 | 0.563   |
| <i>IRS1</i>         | rs2972144   | 0.031                                   | 0.081 | 0.702   | 0.032                           | 0.072 | 0.652   |
| <i>PPARG</i>        | rs11709077  | -0.246                                  | 0.121 | 0.042   | 0.113                           | 0.107 | 0.293   |

| Locus          | Variant    | Fasting TNF-Alpha (adj BMI)- V2 (pg/ml) |       |         | Total Cholesterol - V2 (mmol/l) |       |         |
|----------------|------------|-----------------------------------------|-------|---------|---------------------------------|-------|---------|
|                |            | beta                                    | SE    | p-value | beta                            | SE    | p-value |
| <i>UBE2E2</i>  | rs35352848 | 0.045                                   | 0.090 | 0.618   | 0.020                           | 0.081 | 0.804   |
| <i>KIF9</i>    | rs11926707 | -0.022                                  | 0.078 | 0.783   | -0.046                          | 0.070 | 0.511   |
| <i>RBM6</i>    | rs4688760  | 0.068                                   | 0.083 | 0.415   | -0.001                          | 0.074 | 0.985   |
| <i>RFT1</i>    | rs2581787  | -0.027                                  | 0.075 | 0.723   | -0.032                          | 0.067 | 0.627   |
| <i>PSMD6</i>   | rs3774723  | -0.159                                  | 0.103 | 0.122   | 0.154                           | 0.092 | 0.094   |
| <i>ADAMTS9</i> | rs9860730  | -0.007                                  | 0.079 | 0.925   | 0.013                           | 0.070 | 0.848   |
| <i>SHQ1</i>    | rs13085136 | 0.079                                   | 0.192 | 0.681   | -0.157                          | 0.169 | 0.354   |
| <i>ROBO2</i>   | rs2272163  | -0.060                                  | 0.077 | 0.432   | 0.022                           | 0.067 | 0.748   |
| <i>ADCY5</i>   | rs11708067 | 0.022                                   | 0.092 | 0.812   | 0.107                           | 0.081 | 0.188   |
| <i>SLC12A8</i> | rs649961   | 0.073                                   | 0.075 | 0.330   | 0.062                           | 0.066 | 0.352   |
| <i>TMCC1</i>   | rs9828772  | -0.100                                  | 0.136 | 0.461   | 0.122                           | 0.120 | 0.312   |
| <i>TSC22D2</i> | rs62271373 | 0.014                                   | 0.134 | 0.915   | 0.148                           | 0.118 | 0.212   |
| <i>MBNL1</i>   | rs13065698 | 0.105                                   | 0.078 | 0.176   | 0.009                           | 0.069 | 0.893   |
| <i>EGFEM1P</i> | rs7629630  | 0.017                                   | 0.106 | 0.872   | 0.090                           | 0.094 | 0.338   |
| <i>SLC2A2</i>  | rs9873618  | -0.047                                  | 0.083 | 0.572   | 0.026                           | 0.074 | 0.723   |
| <i>ABCC5</i>   | rs2872246  | 0.002                                   | 0.073 | 0.979   | -0.038                          | 0.064 | 0.558   |
| <i>IGF2BP2</i> | rs6780171  | -0.085                                  | 0.082 | 0.297   | -0.019                          | 0.072 | 0.789   |
| <i>ST6GAL1</i> | rs3887925  | -0.085                                  | 0.075 | 0.263   | 0.141                           | 0.066 | 0.034   |
| <i>LPP</i>     | rs4686471  | -0.004                                  | 0.078 | 0.961   | 0.031                           | 0.069 | 0.652   |
| <i>MAEA</i>    | rs56337234 | 0.023                                   | 0.083 | 0.778   | 0.050                           | 0.073 | 0.494   |
| <i>HTT</i>     | rs362307   | -0.205                                  | 0.148 | 0.168   | -0.073                          | 0.132 | 0.581   |
| <i>WFS1</i>    | rs10937721 | -0.038                                  | 0.076 | 0.611   | 0.028                           | 0.067 | 0.672   |
| <i>LCORL</i>   | rs12640250 | 0.006                                   | 0.087 | 0.947   | -0.021                          | 0.077 | 0.785   |
| <i>GNPDA2</i>  | rs10938398 | 0.040                                   | 0.075 | 0.598   | -0.068                          | 0.066 | 0.307   |
| <i>USP46</i>   | rs2102278  | -0.014                                  | 0.082 | 0.864   | 0.160                           | 0.073 | 0.028   |
| <i>SCD5</i>    | rs12642790 | 0.009                                   | 0.080 | 0.906   | 0.098                           | 0.071 | 0.165   |
| <i>FAM13A</i>  | rs1903002  | 0.059                                   | 0.077 | 0.442   | -0.047                          | 0.068 | 0.491   |
| <i>SMARCA1</i> | rs6821438  | 0.116                                   | 0.076 | 0.129   | -0.021                          | 0.068 | 0.753   |
| <i>SLC9B1</i>  | rs1580278  | -0.013                                  | 0.077 | 0.870   | 0.076                           | 0.068 | 0.263   |
| <i>PABPC4L</i> | rs1296328  | -0.225                                  | 0.078 | 0.004   | 0.027                           | 0.069 | 0.703   |

| Locus          | Variant    | Fasting TNF-Alpha (adj BMI)- V2 (pg/ml) |       |         | Total Cholesterol - V2 (mmol/l) |       |         |
|----------------|------------|-----------------------------------------|-------|---------|---------------------------------|-------|---------|
|                |            | beta                                    | SE    | p-value | beta                            | SE    | p-value |
| <i>TMEM154</i> | rs7669833  | 0.118                                   | 0.081 | 0.148   | 0.061                           | 0.071 | 0.396   |
| <i>PDGFC</i>   | rs28819812 | 0.104                                   | 0.080 | 0.195   | 0.021                           | 0.071 | 0.771   |
| <i>ACSL1</i>   | rs58730668 | 0.008                                   | 0.112 | 0.942   | -0.002                          | 0.099 | 0.984   |
| <i>MRPS30</i>  | rs6884702  | -0.085                                  | 0.076 | 0.263   | 0.064                           | 0.068 | 0.345   |
| <i>ITGA1</i>   | rs3811978  | 0.197                                   | 0.101 | 0.051   | 0.048                           | 0.090 | 0.590   |
| <i>ARL15</i>   | rs702634   | 0.043                                   | 0.082 | 0.603   | 0.025                           | 0.073 | 0.729   |
| <i>ANKRD55</i> | rs465002   | 0.005                                   | 0.083 | 0.947   | -0.030                          | 0.073 | 0.683   |
| <i>PIK3R1</i>  | rs4976033  | 0.022                                   | 0.074 | 0.764   | 0.024                           | 0.065 | 0.709   |
| <i>POC5</i>    | rs2307111  | -0.018                                  | 0.074 | 0.805   | -0.067                          | 0.065 | 0.309   |
| <i>ZBED3</i>   | rs4457053  | -0.032                                  | 0.081 | 0.691   | 0.011                           | 0.072 | 0.880   |
| <i>DMGDH</i>   | rs1316776  | 0.012                                   | 0.080 | 0.885   | -0.161                          | 0.070 | 0.023   |
| <i>RASA1</i>   | rs7719891  | 0.001                                   | 0.080 | 0.986   | -0.019                          | 0.071 | 0.791   |
| <i>PCSK1</i>   | rs13179048 | -0.022                                  | 0.080 | 0.780   | -0.009                          | 0.071 | 0.897   |
| <i>PHF15</i>   | rs329122   | 0.256                                   | 0.078 | 0.001   | -0.047                          | 0.069 | 0.500   |
| <i>EBF1</i>    | rs3934712  | -0.011                                  | 0.090 | 0.899   | 0.007                           | 0.080 | 0.934   |
| <i>RREB1</i>   | rs9379084  | 0.049                                   | 0.123 | 0.694   | -0.029                          | 0.109 | 0.791   |
| <i>CDKAL1</i>  | rs7756992  | 0.087                                   | 0.083 | 0.297   | -0.072                          | 0.074 | 0.331   |
| <i>MHC</i>     | rs601945   | -0.189                                  | 0.112 | 0.091   | 0.126                           | 0.099 | 0.202   |
| <i>LRFN2</i>   | rs34298980 | -0.131                                  | 0.080 | 0.101   | -0.076                          | 0.071 | 0.283   |
| <i>VEGFA</i>   | rs6458354  | 0.070                                   | 0.085 | 0.408   | -0.036                          | 0.075 | 0.633   |
| <i>TFAP2B</i>  | rs3798519  | 0.014                                   | 0.098 | 0.887   | 0.018                           | 0.086 | 0.832   |
| <i>BEND3</i>   | rs4946812  | -0.026                                  | 0.085 | 0.757   | -0.053                          | 0.075 | 0.478   |
| <i>CENPW</i>   | rs11759026 | -0.100                                  | 0.092 | 0.276   | -0.013                          | 0.081 | 0.874   |
| <i>SOGA3</i>   | rs2800733  | 0.060                                   | 0.084 | 0.476   | 0.008                           | 0.075 | 0.919   |
| <i>SLC35D3</i> | rs9494624  | 0.013                                   | 0.085 | 0.882   | -0.024                          | 0.076 | 0.753   |
| <i>MIR3668</i> | rs2982521  | -0.191                                  | 0.077 | 0.014   | -0.025                          | 0.069 | 0.715   |
| <i>SLC22A3</i> | rs474513   | -0.034                                  | 0.075 | 0.650   | 0.023                           | 0.067 | 0.732   |
| <i>QKI</i>     | rs4709746  | 0.096                                   | 0.109 | 0.380   | -0.028                          | 0.097 | 0.774   |
| <i>DGKB</i>    | rs10228066 | -0.042                                  | 0.076 | 0.577   | -0.007                          | 0.067 | 0.921   |
| <i>IGF2BP3</i> | rs4279506  | -0.084                                  | 0.076 | 0.265   | -0.059                          | 0.067 | 0.380   |

| Locus    | Variant    | Fasting TNF-Alpha (adj BMI)- V2 (pg/ml) |       |         | Total Cholesterol - V2 (mmol/l) |       |         |
|----------|------------|-----------------------------------------|-------|---------|---------------------------------|-------|---------|
|          |            | beta                                    | SE    | p-value | beta                            | SE    | p-value |
| JAZF1    | rs1708302  | -0.066                                  | 0.074 | 0.369   | -0.125                          | 0.065 | 0.056   |
| CRHR2    | rs917195   | 0.066                                   | 0.088 | 0.453   | -0.098                          | 0.078 | 0.211   |
| GCK      | rs878521   | -0.103                                  | 0.085 | 0.226   | -0.005                          | 0.076 | 0.948   |
| FBXL13   | rs11496066 | -0.153                                  | 0.098 | 0.120   | -0.125                          | 0.088 | 0.155   |
| RELN     | rs39328    | 0.066                                   | 0.077 | 0.393   | -0.083                          | 0.068 | 0.223   |
| CTTNBP2  | rs6976111  | 0.058                                   | 0.082 | 0.484   | 0.016                           | 0.073 | 0.831   |
| KLF14    | rs1562396  | 0.057                                   | 0.083 | 0.494   | -0.066                          | 0.073 | 0.370   |
| AOC1     | rs62492368 | 0.069                                   | 0.081 | 0.393   | -0.094                          | 0.072 | 0.193   |
| MNX1     | rs6459733  | 0.016                                   | 0.075 | 0.835   | -0.026                          | 0.067 | 0.696   |
| PPP1R3B  | rs4841132  | 0.138                                   | 0.144 | 0.337   | -0.233                          | 0.128 | 0.069   |
| MSRA     | rs17689007 | -0.020                                  | 0.072 | 0.785   | -0.060                          | 0.064 | 0.351   |
| XKR6     | rs57327348 | -0.005                                  | 0.103 | 0.961   | -0.043                          | 0.090 | 0.632   |
| LPL      | rs10096633 | 0.158                                   | 0.110 | 0.153   | -0.175                          | 0.098 | 0.075   |
| PURG     | rs10954772 | -0.109                                  | 0.080 | 0.174   | 0.042                           | 0.071 | 0.548   |
| ANK1     | rs13262861 | 0.055                                   | 0.093 | 0.554   | -0.025                          | 0.082 | 0.759   |
| TP53INP1 | rs10097617 | -0.110                                  | 0.075 | 0.144   | -0.078                          | 0.067 | 0.244   |
| TRHR     | rs12680028 | 0.018                                   | 0.075 | 0.809   | 0.078                           | 0.067 | 0.246   |
| SLC30A8  | rs3802177  | -0.078                                  | 0.083 | 0.347   | 0.134                           | 0.073 | 0.067   |
| CASC11   | rs17772814 | 0.124                                   | 0.141 | 0.381   | 0.154                           | 0.125 | 0.216   |
| PVT1     | rs1561927  | 0.089                                   | 0.082 | 0.276   | -0.038                          | 0.073 | 0.604   |
| BOP1     | rs4977213  | 0.059                                   | 0.075 | 0.431   | 0.035                           | 0.067 | 0.594   |
| GLIS3    | rs10974438 | 0.025                                   | 0.079 | 0.747   | 0.188                           | 0.069 | 0.007   |
| HAUS6    | rs7022807  | 0.062                                   | 0.077 | 0.418   | 0.077                           | 0.068 | 0.257   |
| FOCAD    | rs7867635  | 0.111                                   | 0.077 | 0.149   | -0.049                          | 0.068 | 0.475   |
| CDKN2A/B | rs10811660 | -0.193                                  | 0.103 | 0.062   | 0.117                           | 0.090 | 0.192   |
| LINGO2   | rs1412234  | 0.026                                   | 0.081 | 0.747   | -0.100                          | 0.071 | 0.161   |
| UBAP2    | rs12001437 | -0.006                                  | 0.075 | 0.934   | -0.069                          | 0.067 | 0.299   |
| MTND2P8  | rs11137820 | -0.063                                  | 0.074 | 0.399   | -0.030                          | 0.066 | 0.653   |
| TLE4     | rs17791513 | 0.134                                   | 0.162 | 0.409   | 0.030                           | 0.143 | 0.831   |
| TLE1     | rs2796441  | -0.006                                  | 0.073 | 0.934   | -0.034                          | 0.065 | 0.604   |

| Locus                | Variant    | Fasting TNF-Alpha (adj BMI)- V2 (pg/ml) |       |         | Total Cholesterol - V2 (mmol/l) |       |         |
|----------------------|------------|-----------------------------------------|-------|---------|---------------------------------|-------|---------|
|                      |            | beta                                    | SE    | p-value | beta                            | SE    | p-value |
| <i>ZNF169</i>        | rs55653563 | 0.016                                   | 0.084 | 0.852   | -0.165                          | 0.074 | 0.026   |
| <i>ABO</i>           | rs505922   | -0.155                                  | 0.077 | 0.044   | 0.083                           | 0.068 | 0.223   |
| <i>GPSM1</i>         | rs28505901 | 0.032                                   | 0.095 | 0.734   | -0.025                          | 0.085 | 0.765   |
| <i>CDC123/CAMK1D</i> | rs11257655 | -0.029                                  | 0.094 | 0.755   | 0.030                           | 0.083 | 0.719   |
| <i>HKDC1</i>         | rs4746822  | -0.055                                  | 0.078 | 0.478   | -0.034                          | 0.069 | 0.622   |
| <i>NEUROG3</i>       | rs2642588  | 0.028                                   | 0.081 | 0.732   | 0.030                           | 0.072 | 0.683   |
| <i>ZMIZ1</i>         | rs703972   | -0.060                                  | 0.078 | 0.446   | -0.009                          | 0.069 | 0.901   |
| <i>PTEN</i>          | rs11202627 | 0.271                                   | 0.104 | 0.009   | -0.006                          | 0.093 | 0.950   |
| <i>HHEX/IDE</i>      | rs10882101 | 0.163                                   | 0.075 | 0.031   | -0.050                          | 0.067 | 0.452   |
| <i>TCF7L2</i>        | rs7903146  | -0.047                                  | 0.078 | 0.551   | 0.044                           | 0.069 | 0.528   |
| <i>WDR11</i>         | rs72631105 | -0.056                                  | 0.100 | 0.574   | 0.204                           | 0.088 | 0.021   |
| <i>PLEKHA1</i>       | rs2280141  | 0.049                                   | 0.076 | 0.521   | 0.009                           | 0.067 | 0.889   |
| <i>INS/IGF2</i>      | rs4929965  | -0.014                                  | 0.077 | 0.851   | 0.086                           | 0.068 | 0.205   |
| <i>KCNQ1</i>         | rs2237895  | -0.046                                  | 0.072 | 0.527   | 0.001                           | 0.064 | 0.989   |
| <i>KCNJ11</i>        | rs5213     | 0.000                                   | 0.082 | 0.999   | -0.068                          | 0.072 | 0.345   |
| <i>METTL15</i>       | rs4923543  | -0.006                                  | 0.082 | 0.937   | -0.011                          | 0.073 | 0.883   |
| <i>PDHX</i>          | rs2767036  | -0.029                                  | 0.082 | 0.719   | -0.013                          | 0.072 | 0.852   |
| <i>HSD17B12</i>      | rs1061810  | 0.153                                   | 0.083 | 0.066   | -0.120                          | 0.074 | 0.106   |
| <i>CRY2</i>          | rs7115753  | -0.058                                  | 0.077 | 0.449   | 0.024                           | 0.068 | 0.725   |
| <i>CELF1</i>         | rs7124681  | 0.083                                   | 0.073 | 0.254   | 0.063                           | 0.065 | 0.333   |
| <i>MAP3K11</i>       | rs1783541  | -0.118                                  | 0.101 | 0.244   | -0.089                          | 0.088 | 0.310   |
| <i>CENTD2/ARAP1</i>  | rs77464186 | -0.041                                  | 0.106 | 0.698   | -0.025                          | 0.095 | 0.794   |
| <i>MTNR1B</i>        | rs10830963 | -0.043                                  | 0.084 | 0.608   | -0.032                          | 0.074 | 0.663   |
| <i>ETS1</i>          | rs67232546 | -0.126                                  | 0.090 | 0.162   | 0.103                           | 0.080 | 0.198   |
| <i>CDKN1B</i>        | rs2066827  | -0.253                                  | 0.116 | 0.029   | 0.096                           | 0.103 | 0.355   |
| <i>ITPR2</i>         | rs718314   | -0.062                                  | 0.086 | 0.470   | 0.075                           | 0.076 | 0.329   |
| <i>KLHDC5</i>        | rs10842994 | -0.011                                  | 0.091 | 0.904   | 0.041                           | 0.081 | 0.613   |
| <i>HMGA2</i>         | rs2258238  | -0.102                                  | 0.118 | 0.388   | 0.257                           | 0.104 | 0.014   |
| <i>TSPAN8/LGR5</i>   | rs1796330  | 0.038                                   | 0.077 | 0.621   | -0.030                          | 0.068 | 0.656   |
| <i>USP44</i>         | rs2197973  | -0.029                                  | 0.074 | 0.696   | -0.077                          | 0.065 | 0.238   |

| Locus           | Variant    | Fasting TNF-Alpha (adj BMI)- V2 (pg/ml) |       |         | Total Cholesterol - V2 (mmol/l) |       |         |
|-----------------|------------|-----------------------------------------|-------|---------|---------------------------------|-------|---------|
|                 |            | beta                                    | SE    | p-value | beta                            | SE    | p-value |
| <i>RMST</i>     | rs77864822 | -0.001                                  | 0.152 | 0.992   | -0.127                          | 0.134 | 0.343   |
| <i>WSCD2</i>    | rs1426371  | 0.057                                   | 0.094 | 0.546   | 0.069                           | 0.084 | 0.412   |
| <i>KSR2</i>     | rs34965774 | -0.131                                  | 0.108 | 0.228   | 0.058                           | 0.096 | 0.546   |
| <i>HNF1A</i>    | rs56348580 | 0.070                                   | 0.082 | 0.391   | -0.033                          | 0.073 | 0.646   |
| <i>MPHOSPH9</i> | rs4148856  | 0.114                                   | 0.085 | 0.182   | 0.110                           | 0.075 | 0.145   |
| <i>ZNF664</i>   | rs7978610  | -0.050                                  | 0.077 | 0.515   | -0.010                          | 0.068 | 0.881   |
| <i>FBRSL1</i>   | rs12811407 | -0.021                                  | 0.082 | 0.800   | 0.041                           | 0.072 | 0.571   |
| <i>RNF6</i>     | rs34584161 | 0.026                                   | 0.085 | 0.760   | 0.062                           | 0.075 | 0.409   |
| <i>HMGB1</i>    | rs11842871 | -0.013                                  | 0.092 | 0.887   | -0.130                          | 0.082 | 0.111   |
| <i>KL</i>       | rs576674   | -0.058                                  | 0.093 | 0.532   | 0.047                           | 0.083 | 0.569   |
| <i>DLEU1</i>    | rs963740   | 0.129                                   | 0.083 | 0.120   | 0.088                           | 0.073 | 0.230   |
| <i>PCDH17</i>   | rs9537803  | 0.051                                   | 0.084 | 0.548   | -0.088                          | 0.075 | 0.239   |
| <i>SRGAP2D</i>  | rs9563615  | -0.016                                  | 0.085 | 0.849   | 0.014                           | 0.075 | 0.857   |
| <i>SPRY2</i>    | rs1359790  | -0.022                                  | 0.083 | 0.789   | 0.012                           | 0.074 | 0.867   |
| <i>IRS2</i>     | rs7987740  | 0.003                                   | 0.078 | 0.972   | -0.065                          | 0.069 | 0.346   |
| <i>SLC7A7</i>   | rs17122772 | 0.004                                   | 0.096 | 0.965   | -0.148                          | 0.085 | 0.082   |
| <i>AKAP6</i>    | rs17522122 | 0.019                                   | 0.075 | 0.797   | 0.055                           | 0.066 | 0.408   |
| <i>CLEC14A</i>  | rs8017808  | 0.067                                   | 0.083 | 0.420   | -0.164                          | 0.073 | 0.026   |
| <i>NRXN3</i>    | rs17836088 | -0.003                                  | 0.092 | 0.976   | -0.118                          | 0.082 | 0.148   |
| <i>SMEK1</i>    | rs8010382  | 0.035                                   | 0.079 | 0.660   | 0.059                           | 0.070 | 0.404   |
| <i>MARK3</i>    | rs62007683 | 0.026                                   | 0.078 | 0.734   | -0.024                          | 0.068 | 0.722   |
| <i>RASGRP1</i>  | rs34715063 | -0.055                                  | 0.116 | 0.638   | -0.065                          | 0.103 | 0.528   |
| <i>LTK</i>      | rs11070332 | 0.021                                   | 0.075 | 0.785   | -0.009                          | 0.067 | 0.890   |
| <i>ONECUT1</i>  | rs2456530  | 0.010                                   | 0.116 | 0.933   | -0.019                          | 0.103 | 0.856   |
| <i>C2CD4A/B</i> | rs8037894  | 0.061                                   | 0.075 | 0.414   | 0.139                           | 0.066 | 0.037   |
| <i>USP3</i>     | rs7178762  | -0.016                                  | 0.075 | 0.835   | -0.028                          | 0.067 | 0.678   |
| <i>MAP2K5</i>   | rs4776970  | 0.054                                   | 0.077 | 0.485   | -0.027                          | 0.068 | 0.689   |
| <i>PTPN9</i>    | rs13737    | -0.073                                  | 0.084 | 0.386   | 0.087                           | 0.075 | 0.247   |
| <i>HMG20A</i>   | rs1005752  | -0.035                                  | 0.082 | 0.671   | 0.086                           | 0.073 | 0.238   |
| <i>AP3S2</i>    | rs4932265  | 0.046                                   | 0.086 | 0.595   | 0.062                           | 0.076 | 0.417   |



| Locus         | Variant    | Fasting TNF-Alpha (adj BMI)- V2 (pg/ml) |       |         | Total Cholesterol - V2 (mmol/l) |       |         |
|---------------|------------|-----------------------------------------|-------|---------|---------------------------------|-------|---------|
|               |            | beta                                    | SE    | p-value | beta                            | SE    | p-value |
| <i>PRC1</i>   | rs12910825 | -0.012                                  | 0.076 | 0.870   | -0.046                          | 0.067 | 0.491   |
| <i>ITFG3</i>  | rs6600191  | -0.042                                  | 0.097 | 0.663   | -0.090                          | 0.086 | 0.296   |
| <i>CLUAP1</i> | rs3751837  | -0.138                                  | 0.095 | 0.148   | 0.054                           | 0.084 | 0.522   |
| <i>ATP2A1</i> | rs8046545  | -0.011                                  | 0.080 | 0.892   | -0.038                          | 0.071 | 0.595   |
| <i>FAM57B</i> | rs11642430 | 0.007                                   | 0.078 | 0.925   | -0.020                          | 0.070 | 0.780   |
| <i>FTO</i>    | rs1421085  | 0.104                                   | 0.074 | 0.160   | -0.032                          | 0.065 | 0.628   |
| <i>NFAT5</i>  | rs862320   | -0.074                                  | 0.075 | 0.326   | -0.118                          | 0.067 | 0.077   |
| <i>BCAR1</i>  | rs72802342 | -0.076                                  | 0.146 | 0.605   | 0.216                           | 0.130 | 0.096   |
| <i>CMIP</i>   | rs2925979  | -0.084                                  | 0.081 | 0.299   | -0.117                          | 0.072 | 0.105   |
| <i>SPG7</i>   | rs12920022 | 0.114                                   | 0.110 | 0.300   | 0.129                           | 0.096 | 0.182   |
| <i>ZZEF1</i>  | rs1377807  | -0.009                                  | 0.081 | 0.911   | 0.032                           | 0.071 | 0.650   |
| <i>ATP1B2</i> | rs1641523  | 0.002                                   | 0.078 | 0.977   | -0.005                          | 0.069 | 0.943   |
| <i>GLP2R</i>  | rs7222481  | 0.057                                   | 0.082 | 0.485   | 0.011                           | 0.073 | 0.879   |
| <i>RAI1</i>   | rs4925109  | 0.014                                   | 0.076 | 0.853   | -0.023                          | 0.066 | 0.730   |
| <i>NF1</i>    | rs71372253 | 0.394                                   | 0.141 | 0.005   | 0.147                           | 0.125 | 0.240   |
| <i>HNF1B</i>  | rs10908278 | -0.027                                  | 0.075 | 0.716   | -0.046                          | 0.067 | 0.491   |
| <i>MLX</i>    | rs34855406 | 0.040                                   | 0.085 | 0.641   | -0.102                          | 0.075 | 0.178   |
| <i>TTL6</i>   | rs35895680 | 0.054                                   | 0.081 | 0.501   | -0.033                          | 0.072 | 0.643   |
| <i>ACE</i>    | rs60276348 | -0.088                                  | 0.095 | 0.353   | 0.110                           | 0.085 | 0.200   |
| <i>BPTF</i>   | rs61676547 | -0.006                                  | 0.089 | 0.950   | 0.010                           | 0.079 | 0.897   |
| <i>LAMA1</i>  | rs7240767  | -0.090                                  | 0.075 | 0.231   | -0.010                          | 0.066 | 0.876   |
| <i>COMMD9</i> | rs62080313 | 0.221                                   | 0.111 | 0.048   | -0.110                          | 0.098 | 0.264   |
| <i>TCF4</i>   | rs72926932 | 0.301                                   | 0.140 | 0.032   | -0.027                          | 0.122 | 0.824   |
| <i>WDR7</i>   | rs17684074 | 0.020                                   | 0.090 | 0.824   | 0.125                           | 0.079 | 0.114   |
| <i>GRP</i>    | rs9957145  | -0.004                                  | 0.106 | 0.972   | 0.061                           | 0.094 | 0.519   |
| <i>MC4R</i>   | rs523288   | -0.058                                  | 0.087 | 0.506   | 0.017                           | 0.076 | 0.824   |
| <i>BCL2A</i>  | rs12454712 | 0.014                                   | 0.090 | 0.878   | 0.003                           | 0.079 | 0.972   |
| <i>UHRF1</i>  | rs7249758  | -0.148                                  | 0.093 | 0.112   | 0.008                           | 0.083 | 0.923   |
| <i>INSR</i>   | rs75253922 | 0.242                                   | 0.095 | 0.011   | -0.038                          | 0.085 | 0.654   |
| <i>MAP2K7</i> | rs4804833  | 0.007                                   | 0.076 | 0.929   | 0.011                           | 0.067 | 0.868   |

| Locus              | Variant     | Fasting TNF-Alpha (adj BMI)- V2 (pg/ml) |       |         | Total Cholesterol - V2 (mmol/l) |       |         |
|--------------------|-------------|-----------------------------------------|-------|---------|---------------------------------|-------|---------|
|                    |             | beta                                    | SE    | p-value | beta                            | SE    | p-value |
| <i>FARSA</i>       | rs3111316   | -0.009                                  | 0.076 | 0.904   | 0.045                           | 0.067 | 0.509   |
| <i>TM6SF2</i>      | rs8107974   | 0.402                                   | 0.148 | 0.007   | -0.002                          | 0.131 | 0.986   |
| <i>PEPD</i>        | rs10406327  | -0.043                                  | 0.073 | 0.554   | -0.015                          | 0.065 | 0.816   |
| <i>TOMM40/APOE</i> | rs429358    | 0.137                                   | 0.115 | 0.237   | -0.315                          | 0.102 | 0.002   |
| <i>GIPR</i>        | rs10406431  | 0.054                                   | 0.076 | 0.477   | -0.089                          | 0.067 | 0.181   |
| <i>ZC3H4</i>       | rs3810291   | 0.027                                   | 0.081 | 0.741   | 0.051                           | 0.072 | 0.481   |
| <i>NKX2.2</i>      | rs13041756  | -0.125                                  | 0.127 | 0.327   | -0.097                          | 0.113 | 0.390   |
| <i>RALY</i>        | rs2268078   | -0.065                                  | 0.080 | 0.418   | 0.029                           | 0.071 | 0.685   |
| <i>EYA2</i>        | rs6063048   | 0.137                                   | 0.088 | 0.119   | 0.066                           | 0.078 | 0.396   |
| <i>CEBPB</i>       | rs11699802  | 0.006                                   | 0.079 | 0.937   | -0.035                          | 0.070 | 0.617   |
| <i>TSHZ2</i>       | rs34454109  | 0.093                                   | 0.091 | 0.306   | -0.171                          | 0.080 | 0.032   |
| <i>GNAS</i>        | rs6070625   | 0.038                                   | 0.074 | 0.611   | 0.065                           | 0.066 | 0.321   |
| <i>TCEA2</i>       | rs59944054  | 0.044                                   | 0.089 | 0.623   | -0.102                          | 0.079 | 0.197   |
| <i>MTMR3/ASCC2</i> | rs6518681   | -0.218                                  | 0.143 | 0.128   | -0.025                          | 0.128 | 0.848   |
| <i>YWHAH</i>       | rs117001013 | 0.026                                   | 0.162 | 0.873   | 0.102                           | 0.142 | 0.475   |
| <i>EP300</i>       | rs5758223   | -0.035                                  | 0.085 | 0.677   | 0.040                           | 0.075 | 0.595   |
| <i>PNPLA3</i>      | rs738408    | -0.032                                  | 0.084 | 0.704   | 0.000                           | 0.075 | 0.996   |
| <i>PIM3</i>        | rs1801645   | 0.036                                   | 0.097 | 0.708   | -0.036                          | 0.087 | 0.680   |

| Locus               | Variant     | Triglycerides - V2 (mmol/l) |       |         | 2-hour C-Peptide (pg/ml) |         |         | 2-hour Glucose (mmol/l) |       |         |
|---------------------|-------------|-----------------------------|-------|---------|--------------------------|---------|---------|-------------------------|-------|---------|
|                     |             | beta                        | SE    | p-value | beta                     | SE      | p-value | beta                    | SE    | p-value |
| <i>MACF1</i>        | rs3768321   | -0.070                      | 0.046 | 0.129   | -130.204                 | 148.247 | 0.380   | -0.007                  | 0.095 | 0.941   |
| <i>FAF1</i>         | rs58432198  | -0.122                      | 0.058 | 0.037   | 61.789                   | 193.152 | 0.749   | 0.342                   | 0.121 | 0.005   |
| <i>PATJ</i>         | rs12140153  | -0.015                      | 0.066 | 0.827   | 84.765                   | 216.876 | 0.696   | -0.027                  | 0.139 | 0.849   |
| <i>PTGFRN</i>       | rs1127215   | -0.051                      | 0.037 | 0.169   | -145.089                 | 120.667 | 0.230   | -0.013                  | 0.077 | 0.867   |
| <i>NOTCH2</i>       | rs1493694   | 0.080                       | 0.064 | 0.209   | -126.759                 | 208.931 | 0.544   | -0.118                  | 0.133 | 0.374   |
| <i>SEC16B</i>       | rs539515    | 0.017                       | 0.049 | 0.725   | -25.734                  | 158.465 | 0.871   | -0.086                  | 0.101 | 0.395   |
| <i>DSTYK</i>        | rs12048743  | -0.034                      | 0.038 | 0.371   | 17.840                   | 124.540 | 0.886   | 0.130                   | 0.079 | 0.100   |
| <i>SRGAP2</i>       | rs9430095   | 0.001                       | 0.037 | 0.968   | 148.227                  | 119.530 | 0.215   | 0.048                   | 0.077 | 0.530   |
| <i>PROX1</i>        | rs340874    | -0.004                      | 0.037 | 0.920   | -185.003                 | 122.337 | 0.131   | -0.042                  | 0.078 | 0.593   |
| <i>LYPLAL1</i>      | rs2820446   | 0.026                       | 0.042 | 0.537   | 141.556                  | 136.727 | 0.301   | 0.148                   | 0.087 | 0.089   |
| <i>ABCB10</i>       | rs348330    | 0.050                       | 0.039 | 0.192   | -194.770                 | 127.084 | 0.126   | 0.007                   | 0.081 | 0.935   |
| <i>GNG4</i>         | rs291367    | 0.014                       | 0.039 | 0.719   | -3.719                   | 128.239 | 0.977   | 0.127                   | 0.082 | 0.120   |
| <i>FAM49A</i>       | rs11680058  | 0.084                       | 0.055 | 0.125   | -65.406                  | 179.792 | 0.716   | 0.058                   | 0.114 | 0.612   |
| <i>DTNB</i>         | rs17802463  | -0.072                      | 0.041 | 0.081   | 154.891                  | 134.765 | 0.251   | -0.096                  | 0.086 | 0.266   |
| <i>GCKR</i>         | rs1260326   | -0.158                      | 0.036 | 0.000   | -55.558                  | 119.737 | 0.643   | -0.108                  | 0.076 | 0.156   |
| <i>THADA</i>        | rs80147536  | 0.046                       | 0.059 | 0.429   | -260.619                 | 193.207 | 0.178   | 0.045                   | 0.122 | 0.715   |
| <i>BNIP1</i>        | rs6545714   | -0.018                      | 0.038 | 0.631   | 102.737                  | 124.638 | 0.410   | -0.072                  | 0.080 | 0.364   |
| <i>BCL11A</i>       | rs243024    | 0.020                       | 0.037 | 0.587   | 44.507                   | 121.444 | 0.714   | 0.021                   | 0.077 | 0.789   |
| <i>CEP68</i>        | rs2249105   | -0.016                      | 0.038 | 0.685   | 37.053                   | 125.899 | 0.769   | -0.080                  | 0.080 | 0.319   |
| <i>GLI2</i>         | rs11688682  | -0.034                      | 0.045 | 0.458   | 20.706                   | 149.222 | 0.890   | -0.069                  | 0.095 | 0.468   |
| <i>PABPC1P2</i>     | rs35999103  | 0.073                       | 0.048 | 0.125   | -39.319                  | 155.552 | 0.801   | -0.036                  | 0.099 | 0.716   |
| <i>CYTIP</i>        | rs13426680  | 0.100                       | 0.075 | 0.184   | 252.630                  | 245.380 | 0.304   | 0.201                   | 0.156 | 0.197   |
| <i>RBMS1</i>        | rs3772071   | 0.036                       | 0.041 | 0.371   | -39.044                  | 132.744 | 0.769   | 0.070                   | 0.085 | 0.413   |
| <i>GRB14/COBLL1</i> | rs10195252  | 0.054                       | 0.040 | 0.173   | 100.986                  | 130.078 | 0.438   | 0.131                   | 0.083 | 0.114   |
| <i>G6PC2</i>        | rs1402837   | -0.031                      | 0.042 | 0.464   | -32.163                  | 138.075 | 0.816   | 0.018                   | 0.089 | 0.842   |
| <i>CRYBA2</i>       | rs113414093 | 0.393                       | 0.146 | 0.007   | 264.617                  | 474.020 | 0.577   | -0.022                  | 0.306 | 0.944   |
| <i>IRS1</i>         | rs2972144   | 0.098                       | 0.040 | 0.014   | 196.194                  | 130.496 | 0.133   | 0.021                   | 0.084 | 0.797   |
| <i>PPARG</i>        | rs11709077  | -0.003                      | 0.060 | 0.965   | 184.104                  | 195.683 | 0.347   | -0.006                  | 0.125 | 0.963   |

| Locus          | Variant    | Triglycerides - V2 (mmol/l) |       |         | 2-hour C-Peptide (pg/ml) |         |         | 2-hour Glucose (mmol/l) |       |         |
|----------------|------------|-----------------------------|-------|---------|--------------------------|---------|---------|-------------------------|-------|---------|
|                |            | beta                        | SE    | p-value | beta                     | SE      | p-value | beta                    | SE    | p-value |
| <i>UBE2E2</i>  | rs35352848 | 0.085                       | 0.045 | 0.059   | -214.811                 | 145.770 | 0.141   | -0.024                  | 0.094 | 0.796   |
| <i>KIF9</i>    | rs11926707 | -0.020                      | 0.039 | 0.613   | -52.112                  | 127.053 | 0.682   | -0.050                  | 0.081 | 0.539   |
| <i>RBM6</i>    | rs4688760  | -0.020                      | 0.041 | 0.632   | 115.558                  | 134.388 | 0.390   | 0.079                   | 0.086 | 0.358   |
| <i>RFT1</i>    | rs2581787  | 0.059                       | 0.037 | 0.115   | 182.626                  | 121.293 | 0.133   | 0.076                   | 0.078 | 0.330   |
| <i>PSMD6</i>   | rs3774723  | -0.126                      | 0.051 | 0.014   | -219.073                 | 167.154 | 0.191   | 0.151                   | 0.107 | 0.160   |
| <i>ADAMTS9</i> | rs9860730  | 0.052                       | 0.039 | 0.178   | -73.952                  | 126.682 | 0.560   | 0.136                   | 0.081 | 0.092   |
| <i>SHQ1</i>    | rs13085136 | 0.058                       | 0.095 | 0.541   | 48.904                   | 308.988 | 0.874   | -0.029                  | 0.200 | 0.883   |
| <i>ROBO2</i>   | rs2272163  | 0.067                       | 0.038 | 0.075   | -26.650                  | 123.941 | 0.830   | 0.032                   | 0.079 | 0.687   |
| <i>ADCY5</i>   | rs11708067 | 0.002                       | 0.046 | 0.972   | 121.916                  | 148.136 | 0.411   | 0.000                   | 0.095 | 0.997   |
| <i>SLC12A8</i> | rs649961   | 0.022                       | 0.037 | 0.554   | 213.168                  | 121.171 | 0.079   | -0.071                  | 0.077 | 0.357   |
| <i>TMCC1</i>   | rs9828772  | 0.007                       | 0.067 | 0.917   | 27.204                   | 222.139 | 0.903   | -0.122                  | 0.141 | 0.389   |
| <i>TSC22D2</i> | rs62271373 | -0.093                      | 0.066 | 0.162   | -254.899                 | 218.899 | 0.245   | -0.013                  | 0.139 | 0.927   |
| <i>MBNL1</i>   | rs13065698 | 0.089                       | 0.038 | 0.021   | 112.321                  | 125.857 | 0.373   | -0.042                  | 0.080 | 0.598   |
| <i>EGFEM1P</i> | rs7629630  | 0.101                       | 0.052 | 0.054   | -5.456                   | 171.572 | 0.975   | -0.036                  | 0.109 | 0.740   |
| <i>SLC2A2</i>  | rs9873618  | 0.041                       | 0.041 | 0.319   | 133.861                  | 134.198 | 0.319   | 0.168                   | 0.086 | 0.050   |
| <i>ABCC5</i>   | rs2872246  | 0.012                       | 0.036 | 0.739   | -84.021                  | 117.681 | 0.476   | -0.045                  | 0.075 | 0.544   |
| <i>IGF2BP2</i> | rs6780171  | -0.031                      | 0.040 | 0.445   | -165.280                 | 132.284 | 0.212   | -0.020                  | 0.084 | 0.813   |
| <i>ST6GAL1</i> | rs3887925  | -0.010                      | 0.037 | 0.782   | -230.434                 | 121.621 | 0.059   | -0.038                  | 0.078 | 0.626   |
| <i>LPP</i>     | rs4686471  | -0.053                      | 0.039 | 0.171   | -44.041                  | 125.993 | 0.727   | -0.056                  | 0.081 | 0.489   |
| <i>MAEA</i>    | rs56337234 | 0.028                       | 0.041 | 0.487   | 38.837                   | 134.347 | 0.773   | -0.051                  | 0.085 | 0.554   |
| <i>HTT</i>     | rs362307   | 0.098                       | 0.074 | 0.183   | 33.483                   | 239.914 | 0.889   | 0.127                   | 0.158 | 0.420   |
| <i>WFS1</i>    | rs10937721 | 0.044                       | 0.037 | 0.238   | -129.493                 | 122.559 | 0.291   | 0.057                   | 0.078 | 0.462   |
| <i>LCORL</i>   | rs12640250 | -0.030                      | 0.043 | 0.492   | -72.969                  | 141.061 | 0.605   | 0.001                   | 0.090 | 0.990   |
| <i>GNPDA2</i>  | rs10938398 | -0.033                      | 0.037 | 0.372   | 204.366                  | 120.924 | 0.092   | 0.008                   | 0.077 | 0.916   |
| <i>USP46</i>   | rs2102278  | -0.075                      | 0.041 | 0.066   | -170.011                 | 132.838 | 0.201   | 0.018                   | 0.085 | 0.836   |
| <i>SCD5</i>    | rs12642790 | -0.060                      | 0.040 | 0.130   | -189.771                 | 129.467 | 0.143   | -0.093                  | 0.082 | 0.259   |
| <i>FAM13A</i>  | rs1903002  | 0.033                       | 0.038 | 0.387   | 222.919                  | 123.572 | 0.072   | 0.020                   | 0.079 | 0.801   |
| <i>SMARCA1</i> | rs6821438  | -0.013                      | 0.038 | 0.737   | 224.940                  | 123.933 | 0.070   | 0.136                   | 0.079 | 0.087   |
| <i>SLC9B1</i>  | rs1580278  | -0.014                      | 0.038 | 0.718   | -95.195                  | 124.958 | 0.446   | 0.088                   | 0.080 | 0.267   |
| <i>PABPC4L</i> | rs1296328  | -0.017                      | 0.039 | 0.670   | -101.319                 | 127.760 | 0.428   | -0.128                  | 0.081 | 0.116   |

| Locus          | Variant    | Triglycerides - V2 (mmol/l) |       |         | 2-hour C-Peptide (pg/ml) |         |         | 2-hour Glucose (mmol/l) |       |         |
|----------------|------------|-----------------------------|-------|---------|--------------------------|---------|---------|-------------------------|-------|---------|
|                |            | beta                        | SE    | p-value | beta                     | SE      | p-value | beta                    | SE    | p-value |
| <i>TMEM154</i> | rs7669833  | -0.001                      | 0.040 | 0.982   | 0.853                    | 131.399 | 0.995   | 0.014                   | 0.083 | 0.868   |
| <i>PDGFC</i>   | rs28819812 | -0.005                      | 0.040 | 0.903   | 5.635                    | 130.434 | 0.966   | 0.134                   | 0.083 | 0.107   |
| <i>ACSL1</i>   | rs58730668 | 0.057                       | 0.055 | 0.305   | -297.828                 | 178.766 | 0.096   | -0.004                  | 0.115 | 0.974   |
| <i>MRPS30</i>  | rs6884702  | 0.073                       | 0.038 | 0.055   | 79.375                   | 124.173 | 0.523   | 0.112                   | 0.079 | 0.157   |
| <i>ITGA1</i>   | rs3811978  | 0.032                       | 0.050 | 0.518   | 102.083                  | 166.214 | 0.539   | 0.007                   | 0.105 | 0.950   |
| <i>ARL15</i>   | rs702634   | -0.030                      | 0.041 | 0.463   | -150.603                 | 132.928 | 0.258   | 0.031                   | 0.085 | 0.711   |
| <i>ANKRD55</i> | rs465002   | 0.009                       | 0.041 | 0.830   | 325.630                  | 133.246 | 0.015   | 0.022                   | 0.085 | 0.798   |
| <i>PIK3R1</i>  | rs4976033  | 0.061                       | 0.036 | 0.095   | 250.016                  | 118.928 | 0.036   | 0.098                   | 0.076 | 0.198   |
| <i>POC5</i>    | rs2307111  | -0.068                      | 0.037 | 0.063   | 74.668                   | 119.732 | 0.533   | -0.091                  | 0.076 | 0.233   |
| <i>ZBED3</i>   | rs4457053  | -0.031                      | 0.040 | 0.437   | -219.211                 | 132.929 | 0.100   | 0.006                   | 0.085 | 0.941   |
| <i>DMGDH</i>   | rs1316776  | 0.008                       | 0.040 | 0.849   | 33.987                   | 129.879 | 0.794   | 0.015                   | 0.082 | 0.856   |
| <i>RASA1</i>   | rs7719891  | -0.001                      | 0.040 | 0.986   | -265.337                 | 129.800 | 0.041   | 0.066                   | 0.083 | 0.430   |
| <i>PCSK1</i>   | rs13179048 | -0.012                      | 0.040 | 0.770   | -31.618                  | 129.224 | 0.807   | 0.158                   | 0.082 | 0.056   |
| <i>PHF15</i>   | rs329122   | 0.003                       | 0.039 | 0.939   | 60.736                   | 127.648 | 0.634   | 0.046                   | 0.081 | 0.573   |
| <i>EBF1</i>    | rs3934712  | -0.022                      | 0.045 | 0.623   | -2.477                   | 146.642 | 0.987   | 0.018                   | 0.093 | 0.846   |
| <i>RREB1</i>   | rs9379084  | 0.041                       | 0.061 | 0.497   | 158.483                  | 199.553 | 0.427   | 0.169                   | 0.126 | 0.182   |
| <i>CDKAL1</i>  | rs7756992  | -0.025                      | 0.042 | 0.553   | -18.005                  | 135.741 | 0.895   | 0.162                   | 0.087 | 0.063   |
| <i>MHC</i>     | rs601945   | 0.030                       | 0.055 | 0.583   | 314.113                  | 180.502 | 0.082   | 0.027                   | 0.115 | 0.818   |
| <i>LRFN2</i>   | rs34298980 | -0.049                      | 0.039 | 0.218   | 119.733                  | 129.843 | 0.357   | -0.021                  | 0.082 | 0.801   |
| <i>VEGFA</i>   | rs6458354  | -0.014                      | 0.042 | 0.733   | 65.639                   | 137.583 | 0.633   | 0.076                   | 0.087 | 0.385   |
| <i>TFAP2B</i>  | rs3798519  | 0.091                       | 0.048 | 0.056   | -82.439                  | 156.879 | 0.599   | -0.037                  | 0.100 | 0.712   |
| <i>BEND3</i>   | rs4946812  | 0.062                       | 0.042 | 0.138   | -279.683                 | 136.233 | 0.041   | 0.004                   | 0.088 | 0.963   |
| <i>CENPW</i>   | rs11759026 | -0.021                      | 0.046 | 0.649   | 153.046                  | 148.244 | 0.302   | -0.168                  | 0.095 | 0.077   |
| <i>SOGA3</i>   | rs2800733  | -0.094                      | 0.042 | 0.025   | -17.537                  | 137.282 | 0.898   | 0.077                   | 0.088 | 0.381   |
| <i>SLC35D3</i> | rs9494624  | 0.014                       | 0.042 | 0.749   | 27.094                   | 137.917 | 0.844   | 0.092                   | 0.088 | 0.300   |
| <i>MIR3668</i> | rs2982521  | -0.048                      | 0.039 | 0.217   | 109.602                  | 126.153 | 0.385   | -0.061                  | 0.081 | 0.451   |
| <i>SLC22A3</i> | rs474513   | 0.028                       | 0.038 | 0.452   | 40.812                   | 122.313 | 0.739   | 0.049                   | 0.079 | 0.536   |
| <i>QKI</i>     | rs4709746  | -0.013                      | 0.054 | 0.816   | 250.981                  | 176.490 | 0.156   | 0.121                   | 0.113 | 0.286   |
| <i>DGKB</i>    | rs10228066 | -0.010                      | 0.037 | 0.781   | 52.777                   | 122.769 | 0.667   | 0.141                   | 0.078 | 0.073   |
| <i>IGF2BP3</i> | rs4279506  | 0.015                       | 0.037 | 0.685   | 75.916                   | 123.056 | 0.538   | 0.024                   | 0.078 | 0.755   |

| Locus           | Variant    | Triglycerides - V2 (mmol/l) |       |         | 2-hour C-Peptide (pg/ml) |         |         | 2-hour Glucose (mmol/l) |       |         |
|-----------------|------------|-----------------------------|-------|---------|--------------------------|---------|---------|-------------------------|-------|---------|
|                 |            | beta                        | SE    | p-value | beta                     | SE      | p-value | beta                    | SE    | p-value |
| <i>JAZF1</i>    | rs1708302  | -0.082                      | 0.036 | 0.024   | 5.841                    | 119.428 | 0.961   | -0.027                  | 0.076 | 0.724   |
| <i>CRHR2</i>    | rs917195   | -0.009                      | 0.044 | 0.838   | 45.151                   | 141.943 | 0.751   | 0.227                   | 0.091 | 0.013   |
| <i>GCK</i>      | rs878521   | -0.016                      | 0.043 | 0.706   | -55.098                  | 138.568 | 0.691   | 0.003                   | 0.089 | 0.971   |
| <i>FBXL13</i>   | rs11496066 | 0.011                       | 0.049 | 0.815   | -236.634                 | 159.595 | 0.139   | -0.006                  | 0.102 | 0.951   |
| <i>RELN</i>     | rs39328    | -0.044                      | 0.038 | 0.247   | -157.086                 | 124.368 | 0.207   | -0.104                  | 0.080 | 0.194   |
| <i>CTTNBP2</i>  | rs6976111  | 0.027                       | 0.041 | 0.504   | -30.321                  | 134.061 | 0.821   | 0.008                   | 0.086 | 0.926   |
| <i>KLF14</i>    | rs1562396  | 0.028                       | 0.041 | 0.498   | 7.705                    | 134.584 | 0.954   | -0.098                  | 0.085 | 0.250   |
| <i>AOC1</i>     | rs62492368 | -0.050                      | 0.040 | 0.217   | 6.875                    | 130.756 | 0.958   | -0.062                  | 0.084 | 0.462   |
| <i>MNX1</i>     | rs6459733  | 0.044                       | 0.037 | 0.243   | 222.291                  | 121.399 | 0.068   | 0.093                   | 0.078 | 0.235   |
| <i>PPP1R3B</i>  | rs4841132  | 0.087                       | 0.072 | 0.224   | -62.259                  | 232.714 | 0.789   | -0.369                  | 0.152 | 0.016   |
| <i>MSRA</i>     | rs17689007 | -0.062                      | 0.036 | 0.083   | 70.743                   | 117.045 | 0.546   | -0.163                  | 0.074 | 0.029   |
| <i>XKR6</i>     | rs57327348 | -0.042                      | 0.050 | 0.396   | -322.976                 | 167.012 | 0.054   | -0.089                  | 0.105 | 0.397   |
| <i>LPL</i>      | rs10096633 | 0.111                       | 0.055 | 0.043   | 146.679                  | 178.983 | 0.413   | 0.203                   | 0.115 | 0.077   |
| <i>PURG</i>     | rs10954772 | 0.052                       | 0.040 | 0.193   | 127.175                  | 130.119 | 0.329   | 0.162                   | 0.083 | 0.052   |
| <i>ANK1</i>     | rs13262861 | -0.022                      | 0.046 | 0.633   | -23.691                  | 152.267 | 0.876   | -0.158                  | 0.097 | 0.102   |
| <i>TP53INP1</i> | rs10097617 | -0.065                      | 0.038 | 0.085   | -51.367                  | 122.080 | 0.674   | 0.004                   | 0.079 | 0.962   |
| <i>TRHR</i>     | rs12680028 | 0.053                       | 0.037 | 0.155   | 62.744                   | 121.325 | 0.605   | 0.023                   | 0.078 | 0.769   |
| <i>SLC30A8</i>  | rs3802177  | -0.018                      | 0.041 | 0.659   | -155.486                 | 134.807 | 0.249   | 0.077                   | 0.085 | 0.366   |
| <i>CASC11</i>   | rs17772814 | 0.022                       | 0.070 | 0.756   | -188.959                 | 226.236 | 0.404   | -0.105                  | 0.145 | 0.469   |
| <i>PVT1</i>     | rs1561927  | -0.037                      | 0.041 | 0.364   | 21.321                   | 134.030 | 0.874   | -0.051                  | 0.086 | 0.555   |
| <i>BOP1</i>     | rs4977213  | 0.001                       | 0.037 | 0.984   | -239.580                 | 120.669 | 0.048   | -0.186                  | 0.077 | 0.016   |
| <i>GLIS3</i>    | rs10974438 | -0.021                      | 0.039 | 0.590   | 41.757                   | 127.270 | 0.743   | 0.012                   | 0.081 | 0.883   |
| <i>HAUS6</i>    | rs7022807  | 0.082                       | 0.038 | 0.031   | 51.461                   | 124.632 | 0.680   | 0.111                   | 0.080 | 0.162   |
| <i>FOCAD</i>    | rs7867635  | 0.018                       | 0.038 | 0.632   | 177.918                  | 124.246 | 0.153   | 0.023                   | 0.080 | 0.776   |
| <i>CDKN2A/B</i> | rs10811660 | -0.015                      | 0.050 | 0.758   | -473.056                 | 165.784 | 0.004   | -0.115                  | 0.105 | 0.273   |
| <i>LINGO2</i>   | rs1412234  | -0.023                      | 0.040 | 0.567   | 17.424                   | 130.649 | 0.894   | -0.038                  | 0.083 | 0.647   |
| <i>UBAP2</i>    | rs12001437 | 0.015                       | 0.037 | 0.686   | -18.124                  | 122.058 | 0.882   | 0.091                   | 0.078 | 0.243   |
| <i>MTND2P8</i>  | rs11137820 | -0.082                      | 0.037 | 0.026   | -169.258                 | 120.210 | 0.160   | -0.062                  | 0.077 | 0.419   |
| <i>TLE4</i>     | rs17791513 | -0.093                      | 0.080 | 0.243   | 316.966                  | 263.472 | 0.229   | -0.085                  | 0.167 | 0.612   |
| <i>TLE1</i>     | rs2796441  | -0.047                      | 0.036 | 0.196   | 41.174                   | 118.253 | 0.728   | 0.063                   | 0.075 | 0.406   |

| Locus                | Variant    | Triglycerides - V2 (mmol/l) |       |         | 2-hour C-Peptide (pg/ml) |         |         | 2-hour Glucose (mmol/l) |       |         |
|----------------------|------------|-----------------------------|-------|---------|--------------------------|---------|---------|-------------------------|-------|---------|
|                      |            | beta                        | SE    | p-value | beta                     | SE      | p-value | beta                    | SE    | p-value |
| <i>ZNF169</i>        | rs55653563 | 0.010                       | 0.041 | 0.817   | 67.011                   | 135.754 | 0.622   | 0.050                   | 0.086 | 0.560   |
| <i>ABO</i>           | rs505922   | -0.072                      | 0.038 | 0.059   | -178.359                 | 124.808 | 0.154   | 0.007                   | 0.080 | 0.930   |
| <i>GPSM1</i>         | rs28505901 | 0.043                       | 0.047 | 0.363   | 155.914                  | 154.629 | 0.314   | 0.040                   | 0.099 | 0.687   |
| <i>CDC123/CAMK1D</i> | rs11257655 | -0.070                      | 0.047 | 0.134   | 67.747                   | 152.664 | 0.657   | 0.112                   | 0.097 | 0.248   |
| <i>HKDC1</i>         | rs4746822  | 0.006                       | 0.038 | 0.879   | 310.442                  | 125.314 | 0.014   | 0.263                   | 0.079 | 0.001   |
| <i>NEUROG3</i>       | rs2642588  | -0.029                      | 0.041 | 0.480   | 187.896                  | 131.456 | 0.153   | 0.098                   | 0.084 | 0.247   |
| <i>ZMIZ1</i>         | rs703972   | 0.010                       | 0.039 | 0.787   | 158.133                  | 126.254 | 0.211   | 0.018                   | 0.081 | 0.823   |
| <i>PTEN</i>          | rs11202627 | -0.041                      | 0.052 | 0.433   | -53.447                  | 170.274 | 0.754   | -0.005                  | 0.109 | 0.960   |
| <i>HHEX/IDE</i>      | rs10882101 | 0.002                       | 0.037 | 0.952   | 167.173                  | 121.805 | 0.170   | 0.006                   | 0.078 | 0.942   |
| <i>TCF7L2</i>        | rs7903146  | -0.017                      | 0.039 | 0.669   | -6.507                   | 126.908 | 0.959   | 0.162                   | 0.081 | 0.045   |
| <i>WDR11</i>         | rs72631105 | 0.012                       | 0.049 | 0.813   | -342.820                 | 160.616 | 0.033   | -0.028                  | 0.103 | 0.790   |
| <i>PLEKHA1</i>       | rs2280141  | -0.015                      | 0.038 | 0.697   | 126.327                  | 122.762 | 0.304   | 0.209                   | 0.078 | 0.007   |
| <i>INS/IGF2</i>      | rs4929965  | 0.019                       | 0.038 | 0.626   | -100.563                 | 123.995 | 0.418   | -0.038                  | 0.079 | 0.636   |
| <i>KCNQ1</i>         | rs2237895  | 0.004                       | 0.036 | 0.919   | 50.371                   | 117.793 | 0.669   | 0.201                   | 0.075 | 0.007   |
| <i>KCNJ11</i>        | rs5213     | 0.025                       | 0.040 | 0.531   | 165.291                  | 132.699 | 0.213   | 0.179                   | 0.084 | 0.034   |
| <i>METTL15</i>       | rs4923543  | -0.059                      | 0.041 | 0.146   | 149.866                  | 133.090 | 0.261   | -0.043                  | 0.085 | 0.614   |
| <i>PDHX</i>          | rs2767036  | -0.008                      | 0.040 | 0.843   | 192.076                  | 132.356 | 0.147   | 0.035                   | 0.085 | 0.678   |
| <i>HSD17B12</i>      | rs1061810  | -0.017                      | 0.042 | 0.686   | 67.502                   | 135.379 | 0.618   | -0.016                  | 0.087 | 0.851   |
| <i>CRY2</i>          | rs7115753  | 0.034                       | 0.038 | 0.369   | -131.027                 | 124.018 | 0.291   | 0.083                   | 0.079 | 0.293   |
| <i>CELF1</i>         | rs7124681  | -0.029                      | 0.036 | 0.427   | 210.424                  | 117.930 | 0.075   | 0.050                   | 0.076 | 0.507   |
| <i>MAP3K11</i>       | rs1783541  | 0.004                       | 0.049 | 0.937   | -121.883                 | 162.368 | 0.453   | 0.008                   | 0.103 | 0.939   |
| <i>CENTD2/ARAP1</i>  | rs77464186 | 0.072                       | 0.053 | 0.176   | 272.759                  | 172.438 | 0.114   | 0.054                   | 0.111 | 0.628   |
| <i>MTNR1B</i>        | rs10830963 | 0.014                       | 0.042 | 0.736   | -161.829                 | 135.887 | 0.234   | -0.031                  | 0.087 | 0.719   |
| <i>ETS1</i>          | rs67232546 | -0.010                      | 0.045 | 0.820   | -78.691                  | 145.265 | 0.588   | -0.047                  | 0.093 | 0.616   |
| <i>CDKN1B</i>        | rs2066827  | -0.144                      | 0.057 | 0.012   | 22.511                   | 188.349 | 0.905   | 0.213                   | 0.120 | 0.078   |
| <i>ITPR2</i>         | rs718314   | 0.056                       | 0.043 | 0.189   | 191.793                  | 139.647 | 0.170   | 0.022                   | 0.089 | 0.803   |
| <i>KLHDC5</i>        | rs10842994 | 0.028                       | 0.045 | 0.542   | -220.900                 | 147.659 | 0.135   | 0.146                   | 0.095 | 0.123   |
| <i>HMGA2</i>         | rs2258238  | -0.006                      | 0.059 | 0.914   | -252.685                 | 191.316 | 0.187   | 0.168                   | 0.122 | 0.168   |
| <i>TSPAN8/LGR5</i>   | rs1796330  | 0.048                       | 0.038 | 0.207   | -98.657                  | 124.359 | 0.428   | -0.042                  | 0.079 | 0.593   |
| <i>USP44</i>         | rs2197973  | -0.034                      | 0.036 | 0.346   | 117.822                  | 119.230 | 0.323   | 0.038                   | 0.076 | 0.618   |

| Locus           | Variant    | Triglycerides - V2 (mmol/l) |       |         | 2-hour C-Peptide (pg/ml) |         |         | 2-hour Glucose (mmol/l) |       |         |
|-----------------|------------|-----------------------------|-------|---------|--------------------------|---------|---------|-------------------------|-------|---------|
|                 |            | beta                        | SE    | p-value | beta                     | SE      | p-value | beta                    | SE    | p-value |
| <i>RMST</i>     | rs77864822 | 0.103                       | 0.075 | 0.171   | -447.600                 | 246.337 | 0.070   | 0.184                   | 0.157 | 0.240   |
| <i>WSCD2</i>    | rs1426371  | -0.031                      | 0.047 | 0.501   | 44.190                   | 152.200 | 0.772   | -0.059                  | 0.097 | 0.542   |
| <i>KSR2</i>     | rs34965774 | 0.079                       | 0.053 | 0.138   | -180.302                 | 175.647 | 0.305   | 0.048                   | 0.113 | 0.674   |
| <i>HNF1A</i>    | rs56348580 | -0.003                      | 0.041 | 0.939   | 94.143                   | 132.879 | 0.479   | -0.051                  | 0.085 | 0.548   |
| <i>MPHOSPH9</i> | rs4148856  | 0.016                       | 0.042 | 0.714   | 90.990                   | 138.165 | 0.510   | 0.100                   | 0.088 | 0.255   |
| <i>ZNF664</i>   | rs7978610  | -0.037                      | 0.038 | 0.337   | -122.959                 | 124.877 | 0.325   | 0.093                   | 0.080 | 0.242   |
| <i>FBRSL1</i>   | rs12811407 | 0.030                       | 0.040 | 0.462   | -165.485                 | 132.112 | 0.211   | 0.039                   | 0.085 | 0.644   |
| <i>RNF6</i>     | rs34584161 | -0.062                      | 0.042 | 0.141   | 249.671                  | 137.384 | 0.070   | 0.104                   | 0.088 | 0.235   |
| <i>HMGB1</i>    | rs11842871 | 0.061                       | 0.046 | 0.181   | -81.704                  | 150.481 | 0.587   | 0.110                   | 0.095 | 0.248   |
| <i>KL</i>       | rs576674   | 0.060                       | 0.046 | 0.193   | -163.683                 | 151.878 | 0.282   | -0.087                  | 0.097 | 0.367   |
| <i>DLEU1</i>    | rs963740   | 0.041                       | 0.041 | 0.315   | 107.608                  | 134.882 | 0.425   | 0.106                   | 0.086 | 0.217   |
| <i>PCDH17</i>   | rs9537803  | 0.041                       | 0.042 | 0.332   | 7.738                    | 136.318 | 0.955   | 0.077                   | 0.087 | 0.377   |
| <i>SRGAP2D</i>  | rs9563615  | 0.022                       | 0.042 | 0.595   | 14.863                   | 138.010 | 0.914   | 0.061                   | 0.088 | 0.485   |
| <i>SPRY2</i>    | rs1359790  | 0.043                       | 0.041 | 0.301   | 96.579                   | 134.387 | 0.473   | 0.051                   | 0.086 | 0.551   |
| <i>IRS2</i>     | rs7987740  | -0.023                      | 0.039 | 0.559   | 201.728                  | 126.877 | 0.112   | 0.014                   | 0.081 | 0.861   |
| <i>SLC7A7</i>   | rs17122772 | -0.014                      | 0.048 | 0.774   | -118.455                 | 155.184 | 0.446   | -0.063                  | 0.099 | 0.524   |
| <i>AKAP6</i>    | rs17522122 | 0.017                       | 0.037 | 0.639   | -132.678                 | 121.424 | 0.275   | 0.081                   | 0.077 | 0.296   |
| <i>CLEC14A</i>  | rs8017808  | -0.046                      | 0.041 | 0.268   | 208.547                  | 134.434 | 0.121   | 0.008                   | 0.086 | 0.922   |
| <i>NRXN3</i>    | rs17836088 | -0.056                      | 0.046 | 0.221   | 322.046                  | 148.660 | 0.031   | 0.027                   | 0.096 | 0.774   |
| <i>SMEK1</i>    | rs8010382  | 0.018                       | 0.039 | 0.644   | 111.051                  | 128.385 | 0.387   | 0.116                   | 0.082 | 0.158   |
| <i>MARK3</i>    | rs62007683 | -0.031                      | 0.038 | 0.421   | -71.734                  | 125.273 | 0.567   | -0.044                  | 0.080 | 0.576   |
| <i>RASGRP1</i>  | rs34715063 | -0.054                      | 0.058 | 0.347   | -348.610                 | 187.550 | 0.064   | -0.116                  | 0.121 | 0.339   |
| <i>LTK</i>      | rs11070332 | -0.008                      | 0.037 | 0.821   | 31.794                   | 121.977 | 0.794   | 0.031                   | 0.078 | 0.695   |
| <i>ONECUT1</i>  | rs2456530  | 0.031                       | 0.058 | 0.586   | 170.726                  | 189.277 | 0.367   | 0.000                   | 0.121 | 1.000   |
| <i>C2CD4A/B</i> | rs8037894  | 0.042                       | 0.037 | 0.255   | 18.924                   | 119.830 | 0.875   | 0.072                   | 0.078 | 0.357   |
| <i>USP3</i>     | rs7178762  | 0.029                       | 0.037 | 0.437   | -92.497                  | 121.859 | 0.448   | 0.059                   | 0.078 | 0.447   |
| <i>MAP2K5</i>   | rs4776970  | -0.019                      | 0.038 | 0.615   | 150.728                  | 124.221 | 0.225   | -0.071                  | 0.079 | 0.366   |
| <i>PTPN9</i>    | rs13737    | -0.018                      | 0.042 | 0.669   | 52.789                   | 136.894 | 0.700   | -0.083                  | 0.088 | 0.344   |
| <i>HMG20A</i>   | rs1005752  | 0.046                       | 0.041 | 0.253   | 37.016                   | 133.554 | 0.782   | 0.036                   | 0.085 | 0.669   |
| <i>AP3S2</i>    | rs4932265  | -0.061                      | 0.043 | 0.154   | 28.768                   | 139.648 | 0.837   | 0.042                   | 0.089 | 0.641   |



| Locus         | Variant    | Triglycerides - V2 (mmol/l) |       |         | 2-hour C-Peptide (pg/ml) |         |         | 2-hour Glucose (mmol/l) |       |         |
|---------------|------------|-----------------------------|-------|---------|--------------------------|---------|---------|-------------------------|-------|---------|
|               |            | beta                        | SE    | p-value | beta                     | SE      | p-value | beta                    | SE    | p-value |
| <i>PRC1</i>   | rs12910825 | 0.037                       | 0.038 | 0.327   | -31.141                  | 123.595 | 0.801   | 0.063                   | 0.079 | 0.424   |
| <i>ITFG3</i>  | rs6600191  | -0.078                      | 0.048 | 0.103   | -11.638                  | 156.403 | 0.941   | -0.043                  | 0.100 | 0.667   |
| <i>CLUAP1</i> | rs3751837  | -0.001                      | 0.047 | 0.985   | -238.652                 | 153.887 | 0.122   | -0.167                  | 0.098 | 0.090   |
| <i>ATP2A1</i> | rs8046545  | 0.014                       | 0.040 | 0.728   | 72.516                   | 129.646 | 0.576   | 0.120                   | 0.082 | 0.146   |
| <i>FAM57B</i> | rs11642430 | 0.001                       | 0.039 | 0.979   | -154.488                 | 126.820 | 0.224   | 0.079                   | 0.081 | 0.331   |
| <i>FTO</i>    | rs1421085  | -0.010                      | 0.037 | 0.791   | 45.156                   | 119.247 | 0.705   | 0.103                   | 0.076 | 0.175   |
| <i>NFAT5</i>  | rs862320   | -0.063                      | 0.037 | 0.091   | 14.586                   | 122.458 | 0.905   | -0.012                  | 0.078 | 0.882   |
| <i>BCAR1</i>  | rs72802342 | 0.017                       | 0.073 | 0.815   | 191.276                  | 235.820 | 0.418   | 0.046                   | 0.151 | 0.759   |
| <i>CMIP</i>   | rs2925979  | 0.013                       | 0.040 | 0.742   | -59.664                  | 131.415 | 0.650   | -0.157                  | 0.084 | 0.061   |
| <i>SPG7</i>   | rs12920022 | 0.071                       | 0.054 | 0.191   | -50.956                  | 179.137 | 0.776   | 0.034                   | 0.113 | 0.762   |
| <i>ZZEF1</i>  | rs1377807  | -0.001                      | 0.040 | 0.979   | -76.969                  | 130.626 | 0.556   | -0.031                  | 0.083 | 0.708   |
| <i>ATP1B2</i> | rs1641523  | -0.001                      | 0.039 | 0.987   | -3.365                   | 125.949 | 0.979   | 0.143                   | 0.080 | 0.077   |
| <i>GLP2R</i>  | rs7222481  | 0.059                       | 0.041 | 0.146   | 70.537                   | 132.459 | 0.595   | 0.171                   | 0.085 | 0.044   |
| <i>RAI1</i>   | rs4925109  | 0.062                       | 0.037 | 0.094   | 2.259                    | 122.373 | 0.985   | -0.039                  | 0.077 | 0.612   |
| <i>NF1</i>    | rs71372253 | 0.003                       | 0.070 | 0.961   | 184.941                  | 231.172 | 0.424   | 0.188                   | 0.145 | 0.195   |
| <i>HNF1B</i>  | rs10908278 | -0.018                      | 0.037 | 0.635   | -16.363                  | 120.850 | 0.892   | -0.067                  | 0.078 | 0.387   |
| <i>MLX</i>    | rs34855406 | -0.054                      | 0.042 | 0.199   | -71.147                  | 137.517 | 0.605   | -0.240                  | 0.088 | 0.006   |
| <i>TTL6</i>   | rs35895680 | -0.038                      | 0.040 | 0.338   | -44.529                  | 130.746 | 0.734   | -0.235                  | 0.083 | 0.005   |
| <i>ACE</i>    | rs60276348 | 0.044                       | 0.048 | 0.354   | -137.879                 | 154.216 | 0.372   | 0.103                   | 0.099 | 0.297   |
| <i>BPTF</i>   | rs61676547 | -0.036                      | 0.044 | 0.412   | -72.788                  | 144.146 | 0.614   | -0.045                  | 0.092 | 0.625   |
| <i>LAMA1</i>  | rs7240767  | -0.053                      | 0.037 | 0.150   | 143.395                  | 121.540 | 0.239   | 0.011                   | 0.077 | 0.892   |
| <i>COMMD9</i> | rs62080313 | -0.018                      | 0.055 | 0.737   | -69.097                  | 180.634 | 0.702   | -0.053                  | 0.115 | 0.646   |
| <i>TCF4</i>   | rs72926932 | 0.045                       | 0.068 | 0.508   | 44.222                   | 228.522 | 0.847   | -0.054                  | 0.144 | 0.709   |
| <i>WDR7</i>   | rs17684074 | -0.012                      | 0.044 | 0.787   | -187.992                 | 145.115 | 0.196   | 0.023                   | 0.092 | 0.807   |
| <i>GRP</i>    | rs9957145  | -0.033                      | 0.053 | 0.530   | 300.647                  | 171.631 | 0.080   | -0.017                  | 0.110 | 0.878   |
| <i>MC4R</i>   | rs523288   | -0.034                      | 0.043 | 0.424   | 35.027                   | 140.732 | 0.804   | 0.059                   | 0.089 | 0.510   |
| <i>BCL2A</i>  | rs12454712 | 0.006                       | 0.044 | 0.893   | 99.054                   | 144.579 | 0.494   | 0.149                   | 0.092 | 0.107   |
| <i>UHRF1</i>  | rs7249758  | -0.042                      | 0.046 | 0.362   | -89.648                  | 150.305 | 0.551   | 0.063                   | 0.096 | 0.513   |
| <i>INSR</i>   | rs75253922 | -0.017                      | 0.048 | 0.715   | -120.422                 | 154.768 | 0.437   | -0.148                  | 0.099 | 0.136   |
| <i>MAP2K7</i> | rs4804833  | -0.021                      | 0.038 | 0.586   | 67.507                   | 121.744 | 0.579   | -0.028                  | 0.078 | 0.725   |

| Locus              | Variant     | Triglycerides - V2 (mmol/l) |       |         | 2-hour C-Peptide (pg/ml) |         |         | 2-hour Glucose (mmol/l) |       |         |
|--------------------|-------------|-----------------------------|-------|---------|--------------------------|---------|---------|-------------------------|-------|---------|
|                    |             | beta                        | SE    | p-value | beta                     | SE      | p-value | beta                    | SE    | p-value |
| <i>FARSA</i>       | rs3111316   | 0.049                       | 0.038 | 0.192   | -52.997                  | 123.676 | 0.668   | -0.075                  | 0.079 | 0.344   |
| <i>TM6SF2</i>      | rs8107974   | -0.143                      | 0.073 | 0.049   | 345.104                  | 237.459 | 0.147   | -0.114                  | 0.153 | 0.455   |
| <i>PEPD</i>        | rs10406327  | 0.009                       | 0.036 | 0.800   | 164.891                  | 118.384 | 0.164   | 0.088                   | 0.076 | 0.250   |
| <i>TOMM40/APOE</i> | rs429358    | -0.097                      | 0.057 | 0.091   | 244.836                  | 186.742 | 0.190   | 0.043                   | 0.120 | 0.718   |
| <i>GIPR</i>        | rs10406431  | 0.014                       | 0.037 | 0.709   | 127.500                  | 122.056 | 0.297   | -0.098                  | 0.078 | 0.208   |
| <i>ZC3H4</i>       | rs3810291   | 0.002                       | 0.040 | 0.954   | 105.497                  | 131.795 | 0.424   | -0.016                  | 0.084 | 0.849   |
| <i>NKX2.2</i>      | rs13041756  | 0.010                       | 0.063 | 0.880   | -1.940                   | 207.367 | 0.993   | 0.032                   | 0.132 | 0.808   |
| <i>RALY</i>        | rs2268078   | -0.019                      | 0.040 | 0.639   | 194.856                  | 129.982 | 0.134   | 0.107                   | 0.082 | 0.196   |
| <i>EYA2</i>        | rs6063048   | 0.079                       | 0.044 | 0.072   | 5.869                    | 142.739 | 0.967   | 0.126                   | 0.091 | 0.167   |
| <i>CEBPB</i>       | rs11699802  | 0.013                       | 0.039 | 0.737   | -14.977                  | 128.088 | 0.907   | 0.094                   | 0.082 | 0.251   |
| <i>TSHZ2</i>       | rs34454109  | -0.074                      | 0.045 | 0.098   | 123.673                  | 147.645 | 0.403   | 0.032                   | 0.094 | 0.733   |
| <i>GNAS</i>        | rs6070625   | 0.027                       | 0.037 | 0.457   | -36.058                  | 120.167 | 0.764   | -0.030                  | 0.077 | 0.691   |
| <i>TCEA2</i>       | rs59944054  | 0.047                       | 0.044 | 0.289   | 67.612                   | 144.415 | 0.640   | -0.006                  | 0.093 | 0.949   |
| <i>MTMR3/ASCC2</i> | rs6518681   | -0.014                      | 0.072 | 0.842   | 325.758                  | 231.632 | 0.160   | 0.136                   | 0.149 | 0.361   |
| <i>YWHAH</i>       | rs117001013 | -0.037                      | 0.080 | 0.645   | -288.219                 | 259.979 | 0.268   | 0.065                   | 0.166 | 0.693   |
| <i>EP300</i>       | rs5758223   | 0.013                       | 0.042 | 0.756   | -110.912                 | 136.906 | 0.418   | -0.123                  | 0.088 | 0.162   |
| <i>PNPLA3</i>      | rs738408    | -0.002                      | 0.042 | 0.971   | -168.366                 | 135.978 | 0.216   | 0.012                   | 0.087 | 0.890   |
| <i>PIM3</i>        | rs1801645   | -0.184                      | 0.048 | 0.000   | 15.047                   | 158.767 | 0.925   | -0.111                  | 0.101 | 0.274   |

| Locus               | Variant     | 2-hour Insulin (pg/ml) |         |         | Waist Circumference - V1 (cm) |       |         | Weight Gain - V1 to Delivery (kg) |       |         |
|---------------------|-------------|------------------------|---------|---------|-------------------------------|-------|---------|-----------------------------------|-------|---------|
|                     |             | beta                   | SE      | p-value | beta                          | SE    | p-value | beta                              | SE    | p-value |
| <i>MACF1</i>        | rs3768321   | 132.080                | 86.529  | 0.127   | -2.058                        | 0.976 | 0.035   | 0.649                             | 0.334 | 0.052   |
| <i>FAF1</i>         | rs58432198  | 252.568                | 112.429 | 0.025   | 0.502                         | 1.247 | 0.687   | 0.062                             | 0.429 | 0.885   |
| <i>PATJ</i>         | rs12140153  | -163.819               | 126.658 | 0.196   | 0.565                         | 1.414 | 0.690   | -0.131                            | 0.486 | 0.787   |
| <i>PTGFRN</i>       | rs1127215   | -90.607                | 70.385  | 0.199   | -1.169                        | 0.785 | 0.137   | 0.229                             | 0.270 | 0.396   |
| <i>NOTCH2</i>       | rs1493694   | 24.908                 | 122.199 | 0.839   | 1.294                         | 1.367 | 0.344   | -0.477                            | 0.465 | 0.305   |
| <i>SEC16B</i>       | rs539515    | -206.133               | 92.197  | 0.026   | 1.287                         | 1.041 | 0.217   | -0.010                            | 0.356 | 0.977   |
| <i>DSTYK</i>        | rs12048743  | 131.239                | 72.549  | 0.071   | -0.582                        | 0.806 | 0.471   | 0.133                             | 0.278 | 0.632   |
| <i>SRGAP2</i>       | rs9430095   | 104.001                | 69.889  | 0.137   | 0.516                         | 0.781 | 0.509   | 0.292                             | 0.269 | 0.277   |
| <i>PROX1</i>        | rs340874    | -22.968                | 71.535  | 0.748   | -0.934                        | 0.792 | 0.239   | 0.082                             | 0.272 | 0.764   |
| <i>LYPLAL1</i>      | rs2820446   | 114.248                | 79.766  | 0.153   | 1.117                         | 0.891 | 0.211   | 0.066                             | 0.307 | 0.829   |
| <i>ABCB10</i>       | rs348330    | 25.810                 | 74.170  | 0.728   | 0.393                         | 0.827 | 0.635   | 0.281                             | 0.283 | 0.320   |
| <i>GNG4</i>         | rs291367    | 73.285                 | 74.628  | 0.327   | -0.715                        | 0.832 | 0.390   | -0.187                            | 0.286 | 0.513   |
| <i>FAM49A</i>       | rs11680058  | 98.562                 | 104.841 | 0.348   | 0.710                         | 1.172 | 0.545   | -0.430                            | 0.404 | 0.288   |
| <i>DTNB</i>         | rs17802463  | 49.407                 | 78.752  | 0.531   | -0.608                        | 0.873 | 0.487   | -0.132                            | 0.300 | 0.659   |
| <i>GCKR</i>         | rs1260326   | 44.524                 | 69.688  | 0.523   | 0.937                         | 0.785 | 0.233   | 0.339                             | 0.268 | 0.207   |
| <i>THADA</i>        | rs80147536  | 36.049                 | 112.848 | 0.750   | -2.490                        | 1.240 | 0.045   | 0.114                             | 0.429 | 0.790   |
| <i>BNIP1</i>        | rs6545714   | 53.112                 | 72.913  | 0.467   | 1.888                         | 0.809 | 0.020   | 0.084                             | 0.280 | 0.764   |
| <i>BCL11A</i>       | rs243024    | 5.453                  | 70.897  | 0.939   | 0.172                         | 0.796 | 0.829   | 0.039                             | 0.271 | 0.885   |
| <i>CEP68</i>        | rs2249105   | -20.631                | 73.432  | 0.779   | 0.902                         | 0.824 | 0.274   | 0.339                             | 0.281 | 0.228   |
| <i>GLI2</i>         | rs11688682  | 117.941                | 87.009  | 0.176   | 0.859                         | 0.964 | 0.373   | 0.282                             | 0.331 | 0.395   |
| <i>PABPC1P2</i>     | rs35999103  | 111.574                | 90.710  | 0.219   | 1.271                         | 1.013 | 0.210   | -0.401                            | 0.349 | 0.251   |
| <i>CYTIP</i>        | rs13426680  | 216.820                | 143.349 | 0.131   | 1.161                         | 1.593 | 0.466   | 0.085                             | 0.549 | 0.877   |
| <i>RBMS1</i>        | rs3772071   | 40.183                 | 77.549  | 0.605   | -0.106                        | 0.868 | 0.903   | -0.490                            | 0.299 | 0.101   |
| <i>GRB14/COBLL1</i> | rs10195252  | 92.648                 | 75.833  | 0.222   | -0.465                        | 0.857 | 0.588   | 0.145                             | 0.292 | 0.619   |
| <i>G6PC2</i>        | rs1402837   | -97.283                | 80.557  | 0.228   | 0.466                         | 0.909 | 0.608   | 0.009                             | 0.311 | 0.978   |
| <i>CRYBA2</i>       | rs113414093 | 258.597                | 277.115 | 0.351   | 5.832                         | 3.126 | 0.063   | -1.370                            | 1.064 | 0.198   |
| <i>IRS1</i>         | rs2972144   | 108.710                | 76.329  | 0.155   | 1.789                         | 0.853 | 0.036   | -0.069                            | 0.294 | 0.814   |
| <i>PPARG</i>        | rs11709077  | 35.360                 | 113.883 | 0.756   | -1.391                        | 1.288 | 0.281   | 0.192                             | 0.442 | 0.664   |

| Locus           | Variant    | 2-hour Insulin (pg/ml) |         |         | Waist Circumference - V1 (cm) |       |         | Weight Gain - V1 to Delivery (kg) |       |         |
|-----------------|------------|------------------------|---------|---------|-------------------------------|-------|---------|-----------------------------------|-------|---------|
|                 |            | beta                   | SE      | p-value | beta                          | SE    | p-value | beta                              | SE    | p-value |
| <i>UBE2E2</i>   | rs35352848 | -164.721               | 85.012  | 0.053   | 0.008                         | 0.964 | 0.993   | -0.222                            | 0.329 | 0.499   |
| <i>KIF9</i>     | rs11926707 | 32.260                 | 74.226  | 0.664   | 0.910                         | 0.829 | 0.273   | -0.091                            | 0.285 | 0.748   |
| <i>RBM6</i>     | rs4688760  | 15.308                 | 78.555  | 0.846   | 0.657                         | 0.873 | 0.452   | 0.041                             | 0.300 | 0.892   |
| <i>RFT1</i>     | rs2581787  | 38.456                 | 70.927  | 0.588   | 0.896                         | 0.796 | 0.261   | -0.378                            | 0.273 | 0.167   |
| <i>PSMD6</i>    | rs3774723  | 15.732                 | 97.842  | 0.872   | 0.234                         | 1.096 | 0.831   | -0.003                            | 0.377 | 0.994   |
| <i>ADAMTS9</i>  | rs9860730  | -1.825                 | 73.996  | 0.980   | -0.506                        | 0.826 | 0.540   | 0.488                             | 0.284 | 0.086   |
| <i>SHQ1</i>     | rs13085136 | 35.621                 | 180.705 | 0.844   | 5.136                         | 2.001 | 0.011   | -0.745                            | 0.693 | 0.283   |
| <i>ROBO2</i>    | rs2272163  | -33.469                | 72.247  | 0.643   | 0.894                         | 0.802 | 0.265   | -0.027                            | 0.276 | 0.923   |
| <i>ADCY5</i>    | rs11708067 | 38.971                 | 86.511  | 0.653   | 1.391                         | 0.971 | 0.153   | 0.139                             | 0.334 | 0.677   |
| <i>SLC12A8</i>  | rs649961   | -44.489                | 70.805  | 0.530   | -1.312                        | 0.788 | 0.096   | 0.427                             | 0.271 | 0.115   |
| <i>TMCC1</i>    | rs9828772  | 128.781                | 129.786 | 0.322   | 1.222                         | 1.440 | 0.397   | 0.428                             | 0.493 | 0.385   |
| <i>TSC22D2</i>  | rs62271373 | 59.408                 | 127.635 | 0.642   | -0.750                        | 1.411 | 0.595   | 0.935                             | 0.485 | 0.054   |
| <i>MBNL1</i>    | rs13065698 | 19.600                 | 73.663  | 0.790   | 1.031                         | 0.822 | 0.210   | -0.646                            | 0.281 | 0.022   |
| <i>EGFEM1P</i>  | rs7629630  | 11.176                 | 100.137 | 0.911   | -0.042                        | 1.120 | 0.970   | 0.380                             | 0.384 | 0.323   |
| <i>SLC2A2</i>   | rs9873618  | 109.168                | 78.278  | 0.164   | 1.536                         | 0.877 | 0.081   | -0.143                            | 0.302 | 0.635   |
| <i>ABCC5</i>    | rs2872246  | -57.970                | 68.583  | 0.398   | 1.091                         | 0.767 | 0.155   | -0.552                            | 0.262 | 0.036   |
| <i>IGF2BP2</i>  | rs6780171  | -46.004                | 77.365  | 0.552   | -0.068                        | 0.860 | 0.937   | 0.249                             | 0.294 | 0.397   |
| <i>ST6GAL1</i>  | rs3887925  | -38.278                | 71.153  | 0.591   | -0.592                        | 0.794 | 0.456   | -0.448                            | 0.272 | 0.100   |
| <i>LPP</i>      | rs4686471  | -50.457                | 73.434  | 0.492   | 0.167                         | 0.826 | 0.839   | 0.014                             | 0.282 | 0.960   |
| <i>MAEA</i>     | rs56337234 | 62.626                 | 78.335  | 0.424   | 0.111                         | 0.877 | 0.900   | -0.149                            | 0.300 | 0.620   |
| <i>HTT</i>      | rs362307   | 37.590                 | 140.301 | 0.789   | 1.410                         | 1.581 | 0.373   | -0.502                            | 0.545 | 0.357   |
| <i>WFS1</i>     | rs10937721 | -13.228                | 71.675  | 0.854   | 0.531                         | 0.795 | 0.504   | -0.203                            | 0.273 | 0.459   |
| <i>LCORL</i>    | rs12640250 | 10.058                 | 82.439  | 0.903   | -0.779                        | 0.924 | 0.400   | 0.000                             | 0.316 | 0.999   |
| <i>GNPDA2</i>   | rs10938398 | 82.939                 | 70.577  | 0.240   | 0.860                         | 0.788 | 0.275   | -0.136                            | 0.271 | 0.617   |
| <i>USP46</i>    | rs2102278  | -112.602               | 77.614  | 0.147   | 0.528                         | 0.872 | 0.545   | 0.118                             | 0.299 | 0.693   |
| <i>SCD5</i>     | rs12642790 | -100.181               | 75.418  | 0.185   | -0.452                        | 0.844 | 0.593   | -0.375                            | 0.290 | 0.197   |
| <i>FAM13A</i>   | rs1903002  | 32.837                 | 72.223  | 0.650   | -0.364                        | 0.806 | 0.652   | 0.094                             | 0.276 | 0.734   |
| <i>SMARCAD1</i> | rs6821438  | 56.687                 | 72.428  | 0.434   | 0.473                         | 0.817 | 0.563   | 0.207                             | 0.279 | 0.460   |
| <i>SLC9B1</i>   | rs1580278  | 39.830                 | 72.846  | 0.585   | -0.344                        | 0.810 | 0.671   | 0.269                             | 0.278 | 0.334   |
| <i>PABPC4L</i>  | rs1296328  | -120.730               | 74.144  | 0.104   | 0.424                         | 0.835 | 0.611   | -0.055                            | 0.285 | 0.846   |

| Locus          | Variant    | 2-hour Insulin (pg/ml) |         |         | Waist Circumference - V1 (cm) |       |         | Weight Gain - V1 to Delivery (kg) |       |         |
|----------------|------------|------------------------|---------|---------|-------------------------------|-------|---------|-----------------------------------|-------|---------|
|                |            | beta                   | SE      | p-value | beta                          | SE    | p-value | beta                              | SE    | p-value |
| <i>TMEM154</i> | rs7669833  | -90.975                | 76.396  | 0.234   | 0.544                         | 0.854 | 0.524   | -0.006                            | 0.293 | 0.984   |
| <i>PDGFC</i>   | rs28819812 | 36.232                 | 75.697  | 0.632   | -0.911                        | 0.851 | 0.285   | -0.127                            | 0.291 | 0.662   |
| <i>ACSL1</i>   | rs58730668 | -120.258               | 104.649 | 0.251   | -0.217                        | 1.175 | 0.853   | -0.413                            | 0.404 | 0.307   |
| <i>MRPS30</i>  | rs6884702  | 57.493                 | 72.137  | 0.426   | 1.146                         | 0.807 | 0.156   | -0.148                            | 0.276 | 0.593   |
| <i>ITGA1</i>   | rs3811978  | 91.559                 | 96.221  | 0.342   | 1.085                         | 1.065 | 0.309   | 0.541                             | 0.366 | 0.140   |
| <i>ARL15</i>   | rs702634   | 16.658                 | 77.703  | 0.830   | 0.135                         | 0.870 | 0.877   | -0.207                            | 0.297 | 0.485   |
| <i>ANKRD55</i> | rs465002   | 130.880                | 78.026  | 0.094   | 0.810                         | 0.874 | 0.355   | -0.118                            | 0.299 | 0.692   |
| <i>PIK3R1</i>  | rs4976033  | 82.619                 | 69.677  | 0.236   | 1.221                         | 0.775 | 0.116   | 0.112                             | 0.268 | 0.677   |
| <i>POC5</i>    | rs2307111  | -27.877                | 69.891  | 0.690   | 0.816                         | 0.781 | 0.297   | -0.018                            | 0.268 | 0.948   |
| <i>ZBED3</i>   | rs4457053  | -49.697                | 77.819  | 0.523   | -0.826                        | 0.860 | 0.338   | 0.158                             | 0.295 | 0.592   |
| <i>DMGDH</i>   | rs1316776  | -53.976                | 75.649  | 0.476   | -0.960                        | 0.847 | 0.257   | 0.251                             | 0.289 | 0.386   |
| <i>RASA1</i>   | rs7719891  | -131.018               | 75.352  | 0.083   | 0.895                         | 0.850 | 0.293   | -0.113                            | 0.290 | 0.698   |
| <i>PCSK1</i>   | rs13179048 | 21.595                 | 75.456  | 0.775   | 0.052                         | 0.845 | 0.951   | -0.650                            | 0.289 | 0.025   |
| <i>PHF15</i>   | rs329122   | 72.508                 | 74.334  | 0.330   | 0.801                         | 0.832 | 0.336   | 0.344                             | 0.285 | 0.229   |
| <i>EBF1</i>    | rs3934712  | 55.194                 | 85.599  | 0.519   | 0.181                         | 0.956 | 0.850   | 0.305                             | 0.328 | 0.352   |
| <i>RREB1</i>   | rs9379084  | 180.233                | 114.932 | 0.117   | -0.329                        | 1.294 | 0.799   | 0.212                             | 0.451 | 0.638   |
| <i>CDKAL1</i>  | rs7756992  | 93.900                 | 79.191  | 0.236   | -0.275                        | 0.885 | 0.756   | -0.400                            | 0.304 | 0.189   |
| <i>MHC</i>     | rs601945   | 4.908                  | 105.805 | 0.963   | 0.364                         | 1.179 | 0.758   | 0.596                             | 0.405 | 0.142   |
| <i>LRFN2</i>   | rs34298980 | 17.795                 | 75.638  | 0.814   | -1.881                        | 0.841 | 0.026   | 0.532                             | 0.289 | 0.066   |
| <i>VEGFA</i>   | rs6458354  | 89.809                 | 80.243  | 0.264   | -1.047                        | 0.893 | 0.241   | -0.219                            | 0.307 | 0.475   |
| <i>TFAP2B</i>  | rs3798519  | 31.971                 | 91.612  | 0.727   | 0.830                         | 1.019 | 0.416   | -0.694                            | 0.349 | 0.047   |
| <i>BEND3</i>   | rs4946812  | -59.024                | 79.873  | 0.460   | 0.324                         | 0.896 | 0.718   | 0.014                             | 0.307 | 0.963   |
| <i>CENPW</i>   | rs11759026 | 38.733                 | 86.635  | 0.655   | 0.171                         | 0.977 | 0.861   | 0.171                             | 0.334 | 0.608   |
| <i>SOGA3</i>   | rs2800733  | 89.167                 | 80.084  | 0.266   | -0.245                        | 0.895 | 0.784   | 0.275                             | 0.307 | 0.372   |
| <i>SLC35D3</i> | rs9494624  | 38.575                 | 80.534  | 0.632   | -0.693                        | 0.899 | 0.442   | -0.015                            | 0.309 | 0.962   |
| <i>MIR3668</i> | rs2982521  | -0.219                 | 73.541  | 0.998   | -0.282                        | 0.830 | 0.734   | 0.148                             | 0.283 | 0.602   |
| <i>SLC22A3</i> | rs474513   | 41.797                 | 71.403  | 0.559   | 0.056                         | 0.804 | 0.945   | 0.361                             | 0.275 | 0.190   |
| <i>QKI</i>     | rs4709746  | 148.628                | 102.993 | 0.150   | 1.164                         | 1.159 | 0.316   | -0.954                            | 0.396 | 0.016   |
| <i>DGKB</i>    | rs10228066 | 43.958                 | 71.709  | 0.540   | 0.936                         | 0.796 | 0.241   | -0.478                            | 0.272 | 0.080   |
| <i>IGF2BP3</i> | rs4279506  | 66.678                 | 71.606  | 0.352   | 0.057                         | 0.793 | 0.943   | -0.727                            | 0.271 | 0.008   |

| Locus    | Variant    | 2-hour Insulin (pg/ml) |         |         | Waist Circumference - V1 (cm) |       |         | Weight Gain - V1 to Delivery (kg) |       |         |
|----------|------------|------------------------|---------|---------|-------------------------------|-------|---------|-----------------------------------|-------|---------|
|          |            | beta                   | SE      | p-value | beta                          | SE    | p-value | beta                              | SE    | p-value |
| JAZF1    | rs1708302  | 19.807                 | 69.625  | 0.776   | -0.035                        | 0.780 | 0.964   | -0.265                            | 0.267 | 0.322   |
| CRHR2    | rs917195   | 120.080                | 82.766  | 0.147   | 1.010                         | 0.925 | 0.276   | 0.046                             | 0.318 | 0.885   |
| GCK      | rs878521   | -26.446                | 80.934  | 0.744   | -1.034                        | 0.907 | 0.255   | -0.011                            | 0.312 | 0.972   |
| FBXL13   | rs11496066 | -124.318               | 93.213  | 0.183   | -0.967                        | 1.044 | 0.355   | -0.223                            | 0.359 | 0.536   |
| RELN     | rs39328    | 7.723                  | 72.769  | 0.916   | 0.175                         | 0.817 | 0.830   | 0.397                             | 0.279 | 0.156   |
| CTTNBP2  | rs6976111  | -40.189                | 78.271  | 0.608   | -1.705                        | 0.868 | 0.050   | -0.343                            | 0.299 | 0.252   |
| KLF14    | rs1562396  | 36.238                 | 78.324  | 0.644   | 0.122                         | 0.876 | 0.890   | 0.103                             | 0.299 | 0.730   |
| AOC1     | rs62492368 | -29.827                | 76.332  | 0.696   | -0.667                        | 0.857 | 0.437   | -0.171                            | 0.294 | 0.560   |
| MNX1     | rs6459733  | 162.222                | 70.747  | 0.022   | 0.500                         | 0.800 | 0.532   | -0.256                            | 0.274 | 0.352   |
| PPP1R3B  | rs4841132  | 95.583                 | 135.406 | 0.481   | -2.789                        | 1.530 | 0.069   | -0.128                            | 0.524 | 0.807   |
| MSRA     | rs17689007 | -72.215                | 68.334  | 0.291   | -0.524                        | 0.762 | 0.492   | 0.035                             | 0.262 | 0.893   |
| XKR6     | rs57327348 | -16.525                | 97.451  | 0.865   | -0.929                        | 1.080 | 0.390   | 0.225                             | 0.371 | 0.543   |
| LPL      | rs10096633 | 98.265                 | 104.601 | 0.348   | 0.302                         | 1.174 | 0.797   | -0.162                            | 0.403 | 0.687   |
| PURG     | rs10954772 | 249.699                | 75.267  | 0.001   | 1.780                         | 0.842 | 0.035   | -0.370                            | 0.290 | 0.202   |
| ANK1     | rs13262861 | -100.881               | 88.274  | 0.254   | -0.195                        | 0.976 | 0.842   | 0.097                             | 0.335 | 0.771   |
| TP53INP1 | rs10097617 | -17.454                | 71.313  | 0.807   | -0.034                        | 0.802 | 0.966   | 0.146                             | 0.276 | 0.597   |
| TRHR     | rs12680028 | 27.560                 | 70.986  | 0.698   | 1.160                         | 0.800 | 0.148   | -0.374                            | 0.274 | 0.172   |
| SLC30A8  | rs3802177  | -123.913               | 78.653  | 0.116   | -0.647                        | 0.870 | 0.457   | 0.218                             | 0.299 | 0.466   |
| CASC11   | rs17772814 | -199.138               | 132.115 | 0.132   | -0.039                        | 1.498 | 0.979   | -0.096                            | 0.512 | 0.851   |
| PVT1     | rs1561927  | -62.606                | 77.914  | 0.422   | -0.729                        | 0.871 | 0.403   | -0.112                            | 0.299 | 0.709   |
| BOP1     | rs4977213  | -173.253               | 70.316  | 0.014   | 0.144                         | 0.790 | 0.856   | -0.155                            | 0.272 | 0.570   |
| GLIS3    | rs10974438 | -66.308                | 74.375  | 0.373   | 0.888                         | 0.827 | 0.284   | -0.047                            | 0.284 | 0.868   |
| HAUS6    | rs7022807  | 121.123                | 72.459  | 0.095   | 0.892                         | 0.812 | 0.273   | -0.157                            | 0.277 | 0.571   |
| FOCAD    | rs7867635  | 17.999                 | 72.712  | 0.805   | -0.307                        | 0.813 | 0.705   | 0.241                             | 0.279 | 0.387   |
| CDKN2A/B | rs10811660 | -217.674               | 97.043  | 0.025   | -0.765                        | 1.069 | 0.475   | 0.070                             | 0.367 | 0.850   |
| LINGO2   | rs1412234  | -31.702                | 76.276  | 0.678   | -0.536                        | 0.855 | 0.531   | -0.189                            | 0.293 | 0.520   |
| UBAP2    | rs12001437 | 60.660                 | 71.175  | 0.394   | 0.425                         | 0.796 | 0.594   | 0.112                             | 0.273 | 0.683   |
| MTND2P8  | rs11137820 | -73.023                | 70.220  | 0.299   | -0.155                        | 0.793 | 0.845   | -0.123                            | 0.271 | 0.651   |
| TLE4     | rs17791513 | 72.330                 | 153.284 | 0.637   | 2.711                         | 1.725 | 0.116   | -0.116                            | 0.585 | 0.843   |
| TLE1     | rs2796441  | 32.943                 | 69.027  | 0.633   | -0.036                        | 0.772 | 0.962   | 0.172                             | 0.265 | 0.517   |

| Locus                | Variant    | 2-hour Insulin (pg/ml) |         |         | Waist Circumference - V1 (cm) |       |         | Weight Gain - V1 to Delivery (kg) |       |         |
|----------------------|------------|------------------------|---------|---------|-------------------------------|-------|---------|-----------------------------------|-------|---------|
|                      |            | beta                   | SE      | p-value | beta                          | SE    | p-value | beta                              | SE    | p-value |
| <i>ZNF169</i>        | rs55653563 | 93.841                 | 79.180  | 0.236   | 0.012                         | 0.885 | 0.989   | -0.224                            | 0.304 | 0.461   |
| <i>ABO</i>           | rs505922   | -165.982               | 72.446  | 0.022   | -0.074                        | 0.828 | 0.929   | -0.086                            | 0.281 | 0.760   |
| <i>GPSM1</i>         | rs28505901 | -23.999                | 90.431  | 0.791   | -1.498                        | 1.015 | 0.141   | 0.155                             | 0.347 | 0.656   |
| <i>CDC123/CAMK1D</i> | rs11257655 | -66.851                | 88.502  | 0.450   | 0.035                         | 1.009 | 0.972   | 0.169                             | 0.341 | 0.622   |
| <i>HKDC1</i>         | rs4746822  | 104.804                | 73.434  | 0.154   | 1.067                         | 0.817 | 0.192   | -0.085                            | 0.281 | 0.762   |
| <i>NEUROG3</i>       | rs2642588  | 161.485                | 76.692  | 0.036   | 0.956                         | 0.862 | 0.268   | -0.092                            | 0.297 | 0.758   |
| <i>ZMIZ1</i>         | rs703972   | 99.085                 | 73.726  | 0.180   | 0.378                         | 0.827 | 0.648   | -0.140                            | 0.283 | 0.620   |
| <i>PTEN</i>          | rs11202627 | -30.997                | 99.544  | 0.756   | -1.428                        | 1.122 | 0.203   | -0.272                            | 0.381 | 0.476   |
| <i>HHEX/IDE</i>      | rs10882101 | 95.429                 | 71.162  | 0.180   | 1.069                         | 0.798 | 0.181   | -0.305                            | 0.274 | 0.267   |
| <i>TCF7L2</i>        | rs7903146  | -61.177                | 74.062  | 0.409   | -0.266                        | 0.833 | 0.750   | -0.331                            | 0.285 | 0.246   |
| <i>WDR11</i>         | rs72631105 | -153.290               | 93.990  | 0.103   | 0.066                         | 1.055 | 0.950   | -0.550                            | 0.362 | 0.129   |
| <i>PLEKHA1</i>       | rs2280141  | 61.263                 | 71.690  | 0.393   | 1.150                         | 0.801 | 0.152   | -0.287                            | 0.275 | 0.296   |
| <i>INS/IGF2</i>      | rs4929965  | 58.348                 | 72.395  | 0.421   | 0.577                         | 0.815 | 0.479   | -0.127                            | 0.278 | 0.647   |
| <i>KCNQ1</i>         | rs2237895  | 29.190                 | 68.689  | 0.671   | 0.042                         | 0.769 | 0.957   | -0.015                            | 0.264 | 0.954   |
| <i>KCNJ11</i>        | rs5213     | 15.342                 | 77.560  | 0.843   | -0.817                        | 0.863 | 0.344   | -0.237                            | 0.295 | 0.422   |
| <i>METTL15</i>       | rs4923543  | 58.335                 | 77.494  | 0.452   | -1.519                        | 0.866 | 0.080   | 0.222                             | 0.298 | 0.457   |
| <i>PDHX</i>          | rs2767036  | -57.011                | 77.439  | 0.462   | -1.297                        | 0.865 | 0.134   | -0.475                            | 0.295 | 0.108   |
| <i>HSD17B12</i>      | rs1061810  | 33.651                 | 79.040  | 0.670   | -0.350                        | 0.887 | 0.693   | -0.137                            | 0.304 | 0.652   |
| <i>CRY2</i>          | rs7115753  | 60.998                 | 72.298  | 0.399   | 0.555                         | 0.813 | 0.495   | 0.287                             | 0.278 | 0.303   |
| <i>CELF1</i>         | rs7124681  | -4.073                 | 69.009  | 0.953   | -1.216                        | 0.774 | 0.117   | 0.071                             | 0.266 | 0.789   |
| <i>MAP3K11</i>       | rs1783541  | -8.580                 | 94.837  | 0.928   | 1.202                         | 1.046 | 0.251   | -0.074                            | 0.359 | 0.836   |
| <i>CENTD2/ARAP1</i>  | rs77464186 | 133.225                | 100.708 | 0.186   | 0.772                         | 1.126 | 0.493   | -0.385                            | 0.387 | 0.321   |
| <i>MTNR1B</i>        | rs10830963 | -22.018                | 79.139  | 0.781   | 1.758                         | 0.879 | 0.046   | -0.422                            | 0.303 | 0.164   |
| <i>ETS1</i>          | rs67232546 | 21.361                 | 84.887  | 0.801   | -1.565                        | 0.950 | 0.100   | -0.184                            | 0.327 | 0.574   |
| <i>CDKN1B</i>        | rs2066827  | -129.558               | 109.880 | 0.239   | -2.104                        | 1.230 | 0.088   | -0.855                            | 0.422 | 0.043   |
| <i>ITPR2</i>         | rs718314   | 58.412                 | 81.657  | 0.475   | -0.625                        | 0.912 | 0.494   | -0.453                            | 0.313 | 0.149   |
| <i>KLHDC5</i>        | rs10842994 | 20.077                 | 86.427  | 0.816   | -1.284                        | 0.961 | 0.182   | 0.446                             | 0.332 | 0.180   |
| <i>HMGA2</i>         | rs2258238  | -3.040                 | 111.755 | 0.978   | -1.207                        | 1.248 | 0.334   | -0.249                            | 0.430 | 0.563   |
| <i>TSPAN8/LGR5</i>   | rs1796330  | 30.959                 | 72.507  | 0.670   | -0.102                        | 0.805 | 0.899   | 0.068                             | 0.277 | 0.807   |
| <i>USP44</i>         | rs2197973  | 100.893                | 69.579  | 0.148   | 0.926                         | 0.777 | 0.234   | -0.083                            | 0.267 | 0.757   |

| Locus           | Variant    | 2-hour Insulin (pg/ml) |         |         | Waist Circumference - V1 (cm) |       |         | Weight Gain - V1 to Delivery (kg) |       |         |
|-----------------|------------|------------------------|---------|---------|-------------------------------|-------|---------|-----------------------------------|-------|---------|
|                 |            | beta                   | SE      | p-value | beta                          | SE    | p-value | beta                              | SE    | p-value |
| <i>RMST</i>     | rs77864822 | 205.662                | 144.235 | 0.154   | 1.898                         | 1.600 | 0.236   | 0.795                             | 0.548 | 0.148   |
| <i>WSCD2</i>    | rs1426371  | 61.275                 | 88.841  | 0.491   | 0.529                         | 0.996 | 0.596   | 0.580                             | 0.341 | 0.090   |
| <i>KSR2</i>     | rs34965774 | 62.270                 | 102.735 | 0.545   | 0.513                         | 1.143 | 0.654   | -0.040                            | 0.392 | 0.918   |
| <i>HNF1A</i>    | rs56348580 | -17.609                | 77.695  | 0.821   | -0.149                        | 0.865 | 0.863   | 0.044                             | 0.297 | 0.882   |
| <i>MPHOSPH9</i> | rs4148856  | 4.202                  | 80.718  | 0.958   | 0.402                         | 0.901 | 0.656   | 0.089                             | 0.310 | 0.773   |
| <i>ZNF664</i>   | rs7978610  | -44.773                | 72.842  | 0.539   | -0.872                        | 0.817 | 0.286   | 0.160                             | 0.280 | 0.566   |
| <i>FBRSL1</i>   | rs12811407 | -19.460                | 77.285  | 0.801   | 0.637                         | 0.860 | 0.459   | 0.300                             | 0.295 | 0.309   |
| <i>RNF6</i>     | rs34584161 | 75.744                 | 80.412  | 0.347   | -0.871                        | 0.898 | 0.332   | -0.123                            | 0.309 | 0.691   |
| <i>HMGB1</i>    | rs11842871 | 96.864                 | 87.318  | 0.268   | -0.667                        | 0.974 | 0.494   | -0.080                            | 0.337 | 0.812   |
| <i>KL</i>       | rs576674   | -24.913                | 88.715  | 0.779   | 0.259                         | 0.987 | 0.793   | -0.298                            | 0.339 | 0.380   |
| <i>DLEU1</i>    | rs963740   | 144.910                | 78.298  | 0.065   | -0.667                        | 0.877 | 0.447   | 0.187                             | 0.302 | 0.535   |
| <i>PCDH17</i>   | rs9537803  | 30.777                 | 79.601  | 0.699   | -0.582                        | 0.889 | 0.513   | 0.489                             | 0.305 | 0.110   |
| <i>SRGAP2D</i>  | rs9563615  | 22.804                 | 80.610  | 0.777   | 0.054                         | 0.899 | 0.952   | 0.534                             | 0.308 | 0.083   |
| <i>SPRY2</i>    | rs1359790  | -27.992                | 78.531  | 0.722   | 0.199                         | 0.878 | 0.821   | -0.295                            | 0.302 | 0.329   |
| <i>IRS2</i>     | rs7987740  | 141.267                | 73.837  | 0.056   | 0.509                         | 0.833 | 0.542   | 0.164                             | 0.284 | 0.565   |
| <i>SLC7A7</i>   | rs17122772 | -146.998               | 90.443  | 0.105   | -0.635                        | 1.020 | 0.534   | -0.082                            | 0.349 | 0.814   |
| <i>AKAP6</i>    | rs17522122 | 3.401                  | 70.649  | 0.962   | 0.224                         | 0.790 | 0.777   | -0.122                            | 0.272 | 0.654   |
| <i>CLEC14A</i>  | rs8017808  | -9.677                 | 78.385  | 0.902   | 0.306                         | 0.879 | 0.728   | -0.205                            | 0.301 | 0.496   |
| <i>NRXN3</i>    | rs17836088 | 18.273                 | 87.220  | 0.834   | -0.048                        | 0.983 | 0.961   | -0.323                            | 0.335 | 0.335   |
| <i>SMEK1</i>    | rs8010382  | 154.672                | 74.866  | 0.039   | 0.718                         | 0.837 | 0.391   | -0.144                            | 0.288 | 0.618   |
| <i>MARK3</i>    | rs62007683 | 88.416                 | 73.176  | 0.227   | -0.708                        | 0.813 | 0.384   | 0.482                             | 0.278 | 0.084   |
| <i>RASGRP1</i>  | rs34715063 | -15.373                | 109.981 | 0.889   | -0.684                        | 1.232 | 0.579   | -0.647                            | 0.422 | 0.126   |
| <i>LTK</i>      | rs11070332 | -18.436                | 71.184  | 0.796   | -1.425                        | 0.792 | 0.072   | 0.081                             | 0.273 | 0.766   |
| <i>ONECUT1</i>  | rs2456530  | -49.431                | 110.222 | 0.654   | 0.270                         | 1.229 | 0.826   | 0.176                             | 0.422 | 0.677   |
| <i>C2CD4A/B</i> | rs8037894  | 108.168                | 70.544  | 0.126   | 0.378                         | 0.791 | 0.633   | -0.100                            | 0.272 | 0.714   |
| <i>USP3</i>     | rs7178762  | -33.415                | 71.146  | 0.639   | 0.320                         | 0.794 | 0.687   | -0.117                            | 0.274 | 0.670   |
| <i>MAP2K5</i>   | rs4776970  | 33.135                 | 72.394  | 0.647   | -0.089                        | 0.803 | 0.912   | 0.018                             | 0.277 | 0.947   |
| <i>PTPN9</i>    | rs13737    | -134.017               | 79.753  | 0.093   | 0.689                         | 0.897 | 0.443   | 0.430                             | 0.308 | 0.163   |
| <i>HMG20A</i>   | rs1005752  | -17.515                | 77.412  | 0.821   | 0.164                         | 0.869 | 0.850   | -0.250                            | 0.297 | 0.400   |
| <i>AP3S2</i>    | rs4932265  | 82.496                 | 81.121  | 0.310   | -0.530                        | 0.915 | 0.563   | -0.379                            | 0.311 | 0.223   |



| Locus         | Variant    | 2-hour Insulin (pg/ml) |         |         | Waist Circumference - V1 (cm) |       |         | Weight Gain - V1 to Delivery (kg) |       |         |
|---------------|------------|------------------------|---------|---------|-------------------------------|-------|---------|-----------------------------------|-------|---------|
|               |            | beta                   | SE      | p-value | beta                          | SE    | p-value | beta                              | SE    | p-value |
| <i>PRC1</i>   | rs12910825 | 71.983                 | 72.070  | 0.318   | 0.046                         | 0.802 | 0.954   | 0.090                             | 0.277 | 0.744   |
| <i>ITFG3</i>  | rs6600191  | 2.182                  | 91.322  | 0.981   | -0.451                        | 1.026 | 0.661   | 0.129                             | 0.352 | 0.714   |
| <i>CLUAP1</i> | rs3751837  | -70.445                | 90.029  | 0.434   | 0.510                         | 1.002 | 0.611   | 0.359                             | 0.344 | 0.297   |
| <i>ATP2A1</i> | rs8046545  | 6.471                  | 75.566  | 0.932   | 0.680                         | 0.848 | 0.423   | -0.017                            | 0.290 | 0.952   |
| <i>FAM57B</i> | rs11642430 | 10.670                 | 74.232  | 0.886   | 0.946                         | 0.837 | 0.259   | -0.196                            | 0.286 | 0.494   |
| <i>FTO</i>    | rs1421085  | 127.326                | 69.482  | 0.067   | 1.168                         | 0.780 | 0.135   | -0.314                            | 0.267 | 0.240   |
| <i>NFAT5</i>  | rs862320   | -137.312               | 71.108  | 0.054   | -0.200                        | 0.796 | 0.802   | 0.561                             | 0.272 | 0.039   |
| <i>BCAR1</i>  | rs72802342 | 179.344                | 137.771 | 0.194   | 0.684                         | 1.533 | 0.656   | -0.396                            | 0.531 | 0.455   |
| <i>CMIP</i>   | rs2925979  | -58.918                | 76.426  | 0.441   | -1.042                        | 0.861 | 0.226   | 0.380                             | 0.295 | 0.198   |
| <i>SPG7</i>   | rs12920022 | -5.694                 | 104.656 | 0.957   | 0.009                         | 1.154 | 0.994   | -0.796                            | 0.395 | 0.044   |
| <i>ZZEF1</i>  | rs1377807  | 6.092                  | 76.341  | 0.936   | 0.015                         | 0.851 | 0.986   | -0.018                            | 0.293 | 0.950   |
| <i>ATP1B2</i> | rs1641523  | 144.748                | 73.416  | 0.049   | 0.850                         | 0.828 | 0.306   | 0.453                             | 0.284 | 0.111   |
| <i>GLP2R</i>  | rs7222481  | 144.635                | 77.162  | 0.061   | 0.727                         | 0.872 | 0.405   | -0.007                            | 0.299 | 0.983   |
| <i>RAI1</i>   | rs4925109  | -111.038               | 71.091  | 0.119   | -1.145                        | 0.793 | 0.150   | 0.147                             | 0.272 | 0.588   |
| <i>NF1</i>    | rs71372253 | 268.443                | 134.180 | 0.046   | 0.860                         | 1.485 | 0.563   | -0.582                            | 0.509 | 0.253   |
| <i>HNF1B</i>  | rs10908278 | -113.963               | 70.421  | 0.106   | -0.545                        | 0.795 | 0.493   | 0.038                             | 0.273 | 0.889   |
| <i>MLX</i>    | rs34855406 | -98.559                | 80.219  | 0.220   | -1.268                        | 0.900 | 0.160   | -0.273                            | 0.308 | 0.375   |
| <i>TTL6</i>   | rs35895680 | -40.226                | 76.280  | 0.598   | 0.387                         | 0.856 | 0.651   | 0.297                             | 0.293 | 0.312   |
| <i>ACE</i>    | rs60276348 | -47.885                | 90.156  | 0.596   | 0.529                         | 1.023 | 0.606   | -0.225                            | 0.347 | 0.518   |
| <i>BPTF</i>   | rs61676547 | -111.623               | 84.075  | 0.185   | -0.388                        | 0.947 | 0.682   | -0.245                            | 0.327 | 0.454   |
| <i>LAMA1</i>  | rs7240767  | 12.411                 | 70.752  | 0.861   | 0.296                         | 0.791 | 0.709   | -0.111                            | 0.273 | 0.683   |
| <i>COMMD9</i> | rs62080313 | 64.385                 | 104.388 | 0.538   | 0.414                         | 1.190 | 0.728   | 0.399                             | 0.404 | 0.324   |
| <i>TCF4</i>   | rs72926932 | -135.590               | 133.524 | 0.310   | -0.830                        | 1.462 | 0.571   | -0.484                            | 0.502 | 0.335   |
| <i>WDR7</i>   | rs17684074 | 83.436                 | 84.790  | 0.326   | -1.531                        | 0.931 | 0.101   | 0.615                             | 0.320 | 0.055   |
| <i>GRP</i>    | rs9957145  | 94.166                 | 100.367 | 0.349   | 0.662                         | 1.123 | 0.556   | -0.544                            | 0.386 | 0.159   |
| <i>MC4R</i>   | rs523288   | 9.398                  | 81.792  | 0.909   | 2.194                         | 0.904 | 0.016   | -0.687                            | 0.309 | 0.027   |
| <i>BCL2A</i>  | rs12454712 | 102.386                | 84.364  | 0.225   | -1.707                        | 0.946 | 0.072   | -0.274                            | 0.326 | 0.400   |
| <i>UHRF1</i>  | rs7249758  | -129.451               | 87.590  | 0.140   | -1.246                        | 0.984 | 0.206   | 0.123                             | 0.338 | 0.715   |
| <i>INSR</i>   | rs75253922 | -10.411                | 90.419  | 0.908   | 1.492                         | 1.012 | 0.141   | -0.160                            | 0.348 | 0.645   |
| <i>MAP2K7</i> | rs4804833  | 7.054                  | 71.021  | 0.921   | 0.130                         | 0.803 | 0.871   | -0.089                            | 0.274 | 0.746   |

| Locus              | Variant     | 2-hour Insulin (pg/ml) |         |         | Waist Circumference - V1 (cm) |       |         | Weight Gain - V1 to Delivery (kg) |       |         |
|--------------------|-------------|------------------------|---------|---------|-------------------------------|-------|---------|-----------------------------------|-------|---------|
|                    |             | beta                   | SE      | p-value | beta                          | SE    | p-value | beta                              | SE    | p-value |
| <i>FARSA</i>       | rs3111316   | -99.160                | 71.962  | 0.169   | -1.321                        | 0.803 | 0.101   | -0.231                            | 0.277 | 0.405   |
| <i>TM6SF2</i>      | rs8107974   | 102.857                | 139.073 | 0.460   | 0.282                         | 1.553 | 0.856   | -0.099                            | 0.535 | 0.853   |
| <i>PEPD</i>        | rs10406327  | 60.664                 | 69.333  | 0.382   | 0.126                         | 0.779 | 0.871   | -0.125                            | 0.267 | 0.638   |
| <i>TOMM40/APOE</i> | rs429358    | -30.135                | 109.331 | 0.783   | -0.322                        | 1.223 | 0.792   | 0.508                             | 0.419 | 0.226   |
| <i>GIPR</i>        | rs10406431  | -15.592                | 71.456  | 0.827   | 0.284                         | 0.793 | 0.721   | 0.240                             | 0.273 | 0.381   |
| <i>ZC3H4</i>       | rs3810291   | 9.313                  | 77.042  | 0.904   | -0.207                        | 0.857 | 0.809   | 0.316                             | 0.295 | 0.284   |
| <i>NKX2.2</i>      | rs13041756  | -70.510                | 120.826 | 0.560   | 0.988                         | 1.336 | 0.460   | -0.831                            | 0.459 | 0.071   |
| <i>RALY</i>        | rs2268078   | 117.790                | 75.723  | 0.120   | 1.333                         | 0.847 | 0.116   | -0.602                            | 0.289 | 0.038   |
| <i>EYA2</i>        | rs6063048   | 4.569                  | 83.359  | 0.956   | 0.574                         | 0.930 | 0.538   | 0.195                             | 0.321 | 0.544   |
| <i>CEBPB</i>       | rs11699802  | 103.170                | 74.508  | 0.167   | 0.900                         | 0.839 | 0.283   | 0.012                             | 0.288 | 0.967   |
| <i>TSHZ2</i>       | rs34454109  | 51.761                 | 86.249  | 0.549   | 1.142                         | 0.967 | 0.238   | -0.115                            | 0.331 | 0.729   |
| <i>GNAS</i>        | rs6070625   | -14.375                | 70.204  | 0.838   | -0.739                        | 0.783 | 0.346   | 0.060                             | 0.268 | 0.824   |
| <i>TCEA2</i>       | rs59944054  | 89.814                 | 84.300  | 0.287   | -0.837                        | 0.941 | 0.374   | -0.231                            | 0.325 | 0.477   |
| <i>MTMR3/ASCC2</i> | rs6518681   | -10.062                | 135.695 | 0.941   | 0.204                         | 1.536 | 0.895   | -0.151                            | 0.525 | 0.774   |
| <i>YWHAH</i>       | rs117001013 | -97.955                | 150.280 | 0.515   | -5.206                        | 1.703 | 0.002   | 0.345                             | 0.588 | 0.557   |
| <i>EP300</i>       | rs5758223   | -147.405               | 79.755  | 0.065   | -0.327                        | 0.898 | 0.716   | 0.032                             | 0.309 | 0.916   |
| <i>PNPLA3</i>      | rs738408    | -79.236                | 79.463  | 0.319   | -0.381                        | 0.892 | 0.670   | 0.289                             | 0.306 | 0.346   |
| <i>PIM3</i>        | rs1801645   | 120.321                | 92.578  | 0.194   | 0.751                         | 1.034 | 0.468   | 0.256                             | 0.355 | 0.471   |

**Supplemental Table 3A: Associations Between Udlr Cluster Polygenic Scores and Traits in HAPO Sub-Cohorts**

*Linear regression was used to relate cluster polygenic scores to traits in each HAPO sub-cohort*

|               |                     |      | Fasting<br>Glucose<br>(mg/dl) | 1- hour<br>Glucose<br>(mg/dl) | 2-hour Glucose<br>(mg/dl) | BMI (kg/m <sup>2</sup> ) | 1- hour C-<br>peptide z-score | Insulin<br>Sensitivity<br>Index | Triglycerides<br>(mg/dl) |
|---------------|---------------------|------|-------------------------------|-------------------------------|---------------------------|--------------------------|-------------------------------|---------------------------------|--------------------------|
| Beta Cell     | HAPO-AC<br>(N=1103) | Beta | -0.09                         | -0.27                         | 0.56                      | 0.028                    | -0.020                        | 0.067                           | <b>8.15</b>              |
|               |                     | P    | 0.54                          | 0.53                          | 0.11                      | 0.88                     | 0.49                          | 0.15                            | <b>0.01</b>              |
|               | HAPO-MA<br>(N=804)  | Beta | <b>0.45</b>                   | 1.14                          | 0.24                      | 0.06                     | -0.0017                       | -0.01                           | -4.48                    |
|               |                     | P    | <b>0.01</b>                   | 0.15                          | 0.69                      | 0.65                     | 0.95                          | 0.77                            | 0.40                     |
|               | HAPO-EU<br>(N=1369) | Beta | 0.093                         | -0.49                         | 0.20                      | -0.31                    | -0.0036                       | 0.0057                          | -3.14                    |
|               |                     | P    | 0.71                          | 0.67                          | 0.81                      | 0.11                     | 0.92                          | 0.89                            | 0.66                     |
| Proinsulin    | HAPO-AC<br>(N=1103) | Beta | <b>-0.29</b>                  | <b>1.016</b>                  | 0.10                      | -0.08                    | 0.012                         | 0.027                           | 5.02                     |
|               |                     | P    | <b>0.04</b>                   | <b>0.02</b>                   | 0.77                      | 0.66                     | 0.69                          | 0.57                            | 0.13                     |
|               | HAPO-MA<br>(N=804)  | Beta | -0.25                         | -1.45                         | -0.39                     | 0.237                    | -0.009                        | 0.04                            | 5.35                     |
|               |                     | P    | 0.17                          | 0.07                          | 0.51                      | 0.07                     | 0.71                          | 0.28                            | 0.35                     |
|               | HAPO-EU<br>(N=1369) | Beta | 0.32                          | 0.30                          | -0.45                     | 0.045                    | 0.071                         | <b>-0.10</b>                    | 2.35                     |
|               |                     | P    | 0.20                          | 0.80                          | 0.59                      | 0.82                     | 0.06                          | <b>0.02</b>                     | 0.70                     |
| Obesity       | HAPO-AC<br>(N=1103) | Beta | -0.021                        | -0.34                         | 0.21                      | 0.11                     | 0.014                         | -0.041                          | -0.14                    |
|               |                     | P    | 0.88                          | 0.42                          | 0.54                      | 0.55                     | 0.64                          | 0.37                            | 0.97                     |
|               | HAPO-MA<br>(N=804)  | Beta | <b>0.357</b>                  | 0.92                          | 0.30                      | <b>0.41</b>              | 0.01                          | <b>-0.088</b>                   | -3.39                    |
|               |                     | P    | <b>0.046</b>                  | 0.24                          | 0.61                      | <b>0.001</b>             | 0.82                          | <b>0.03</b>                     | 0.28                     |
|               | HAPO-EU<br>(N=1369) | Beta | -0.011                        | -0.79                         | -0.61                     | <b>0.48</b>              | <b>0.10</b>                   | <b>-0.088</b>                   | 0.53                     |
|               |                     | P    | 0.96                          | 0.50                          | 0.47                      | <b>0.02</b>              | <b>0.01</b>                   | <b>0.04</b>                     | 0.94                     |
| Lipodystrophy | HAPO-AC<br>(N=1103) | Beta | -0.069                        | 0.26                          | -0.071                    | -0.027                   | 0.033                         | -0.083                          | -1.48                    |
|               |                     | P    | 0.63                          | 0.54                          | 0.84                      | 0.88                     | 0.26                          | 0.08                            | 0.67                     |
|               | HAPO-MA<br>(N=804)  | Beta | 0.11                          | 0.36                          | -0.32                     | 0.22                     | 0.03                          | -0.06                           | 6.72                     |
|               |                     | P    | 0.54                          | 0.65                          | 0.59                      | 0.09                     | 0.20                          | 0.16                            | 0.21                     |
|               | HAPO-EU<br>(N=1369) | Beta | 0.34                          | 0.22                          | -0.60                     | 0.22                     | <b>0.10</b>                   | -0.065                          | -1.93                    |
|               |                     | P    | 0.18                          | 0.85                          | 0.46                      | 0.25                     | <b>0.01</b>                   | 0.13                            | 0.79                     |
| Liver Lipid   | HAPO-AC<br>(N=1103) | Beta | -0.084                        | -1.0031                       | -0.92                     | -0.14                    | 0.00083                       | 0.038                           | -13.21                   |
|               |                     | P    | 0.64                          | 0.26                          | 0.18                      | 0.18                     | 0.98                          | 0.36                            | 0.06                     |
|               | HAPO-MA<br>(N=804)  | Beta | 0.027                         | 0.021                         | -0.10                     | -0.041                   | <b>0.074</b>                  | <b>-0.12</b>                    | -2.59                    |
|               |                     | P    | 0.85                          | 0.96                          | 0.77                      | 0.82                     | <b>0.01</b>                   | <b>0.01</b>                     | 0.43                     |
|               | HAPO-EU<br>(N=1369) | Beta | <b>0.51</b>                   | 1.01                          | -0.35                     | -0.09                    | 0.03                          | <b>-0.09</b>                    | -4.68                    |
|               |                     | P    | <b>0.005</b>                  | 0.21                          | 0.59                      | 0.52                     | 0.27                          | <b>0.03</b>                     | 0.39                     |
| Liver Lipid   | HAPO-TH<br>(N=1155) | Beta | 0.47                          | 0.037                         | -0.38                     | -0.13                    | 0.068                         | <b>-0.11</b>                    | -5.73                    |
|               |                     | P    | 0.06                          | 0.97                          | 0.65                      | 0.51                     | 0.07                          | <b>0.01</b>                     | 0.40                     |
|               | HAPO-TH<br>(N=1155) | Beta | <b>0.39</b>                   | 1.13                          | 0.36                      | -0.072                   | 0.055                         | <b>-0.10</b>                    | -12.33                   |
|               |                     | P    | <b>0.03</b>                   | 0.21                          | 0.61                      | 0.50                     | 0.05                          | <b>0.02</b>                     | 0.09                     |

AC = Afro-Caribbean; EU = European; MA= Mexican-American; TH=Thai

**Supplemental Table 3B: Associations Between Pregnancy Cluster Polygenic Scores and Traits in HAPO Sub-Cohorts**

*Linear regression was used to relate cluster polygenic scores to traits in each HAPO sub-cohort*

|           |                     |      | Fasting<br>Glucose<br>(mg/dl) | 1- hour<br>Glucose<br>(mg/dl) | 2-hour Glucose<br>(mg/dl) | BMI (kg/m <sup>2</sup> ) | 1- hour C-<br>peptide z-<br>score | Insulin<br>Sensitivity<br>Index | Triglycerides<br>(mg/dl) |
|-----------|---------------------|------|-------------------------------|-------------------------------|---------------------------|--------------------------|-----------------------------------|---------------------------------|--------------------------|
| Cluster 1 | HAPO-AC<br>(N=1103) | Beta | 0.18                          | -0.47                         | -0.39                     | 0.092                    | -0.045                            | 0.034                           | 2.74                     |
|           |                     | P    | 0.20                          | 0.28                          | 0.28                      | 0.61                     | 0.13                              | 0.48                            | 0.45                     |
|           | HAPO-MA<br>(N=804)  | Beta | <b>0.57</b>                   | 1.28                          | 1.051                     | 0.30                     | 0.027                             | -0.062                          | -2.055                   |
|           |                     | P    | <b>0.02</b>                   | 0.27                          | 0.21                      | 0.12                     | 0.47                              | 0.15                            | 0.74                     |
|           | HAPO-EU<br>(N=1369) | Beta | <b>0.84</b>                   | <b>2.11</b>                   | 0.84                      | 0.15                     | 0.0009                            | <b>-0.10</b>                    | -8.79                    |
|           |                     | P    | <b>2.22 × 10<sup>-6</sup></b> | <b>0.01</b>                   | 0.15                      | 0.25                     | 0.97                              | <b>0.01</b>                     | 0.10                     |
| Cluster 2 | HAPO-AC<br>(N=1103) | Beta | 0.18                          | -0.11                         | -0.50                     | -0.23                    | -0.014                            | 0.013                           | 0.71                     |
|           |                     | P    | 0.21                          | 0.79                          | 0.16                      | 0.20                     | 0.64                              | 0.77                            | 0.83                     |
|           | HAPO-MA<br>(N=804)  | Beta | 0.002                         | 0.83                          | 1.12                      | 0.15                     | 0.03                              | -0.04                           | -0.83                    |
|           |                     | P    | 0.99                          | 0.29                          | 0.06                      | 0.25                     | 0.20                              | 0.30                            | 0.89                     |
|           | HAPO-EU<br>(N=1369) | Beta | 0.052                         | -1.97                         | <b>-1.97</b>              | 0.13                     | -0.060                            | 0.041                           | -5.16                    |
|           |                     | P    | 0.84                          | 0.10                          | <b>0.02</b>               | 0.51                     | 0.12                              | 0.35                            | 0.45                     |
| Cluster 3 | HAPO-AC<br>(N=1103) | Beta | 0.035                         | 0.019                         | -0.12                     | 0.049                    | -0.0027                           | 0.031                           | -0.99                    |
|           |                     | P    | 0.80                          | 0.96                          | 0.74                      | 0.78                     | 0.93                              | 0.51                            | 0.77                     |
|           | HAPO-MA<br>(N=804)  | Beta | 0.01                          | -0.29                         | 0.38                      | 0.14                     | -0.05                             | 0.02                            | -4.83                    |
|           |                     | P    | 0.94                          | 0.71                          | 0.52                      | 0.29                     | 0.06                              | 0.55                            | 0.35                     |
|           | HAPO-EU<br>(N=1369) | Beta | 0.35                          | 2.25                          | 0.40                      | 0.10                     | 0.013                             | -0.01                           | -2.90                    |
|           |                     | P    | 0.17                          | 0.05                          | 0.63                      | 0.61                     | 0.74                              | 0.80                            | 0.67                     |
| Cluster 4 | HAPO-AC<br>(N=1103) | Beta | <b>0.46</b>                   | <b>-0.97</b>                  | <b>-0.73</b>              | -0.024                   | -0.029                            | 0.010                           | 1.74                     |
|           |                     | P    | <b>0.001</b>                  | <b>0.02</b>                   | <b>0.04</b>               | 0.90                     | 0.32                              | 0.84                            | 0.61                     |
|           | HAPO-MA<br>(N=804)  | Beta | -0.27                         | -1.44                         | -0.02                     | 0.06                     | -0.06                             | 0.04                            | -1.64                    |
|           |                     | P    | 0.13                          | 0.07                          | 0.97                      | 0.66                     | 0.02                              | 0.35                            | 0.75                     |
|           | HAPO-EU<br>(N=1369) | Beta | <b>0.99</b>                   | -0.30                         | <b>-1.95</b>              | 0.32                     | <b>0.081</b>                      | <b>-0.17</b>                    | 7.75                     |
|           |                     | P    | <b>9.58 × 10<sup>-5</sup></b> | 0.80                          | <b>0.02</b>               | 0.10                     | <b>0.03</b>                       | <b>9.35 × 10<sup>-5</sup></b>   | 0.25                     |
| Cluster 5 | HAPO-AC<br>(N=1103) | Beta | 0.33                          | 0.90                          | -0.16                     | -0.14                    | 0.0037                            | -0.058                          | -8.41                    |
|           |                     | P    | 0.07                          | 0.32                          | 0.82                      | 0.17                     | 0.90                              | 0.17                            | 0.26                     |
|           | HAPO-MA<br>(N=804)  | Beta | -0.050                        | 0.14                          | 0.17                      | -0.19                    | -0.013                            | 0.011                           | -2.84                    |
|           |                     | P    | 0.73                          | 0.75                          | 0.64                      | 0.28                     | 0.66                              | 0.82                            | 0.39                     |
|           | HAPO-EU<br>(N=1369) | Beta | -0.11                         | 0.78                          | 0.73                      | -0.01                    | -0.04                             | 0.05                            | -1.91                    |
|           |                     | P    | 0.54                          | 0.33                          | 0.22                      | 0.95                     | 0.07                              | 0.22                            | 0.75                     |
| Cluster 5 | HAPO-TH<br>(N=1155) | Beta | 0.33                          | 3.46                          | <b>1.90</b>               | 0.091                    | -0.0078                           | -0.010                          | 7.64                     |
|           |                     | P    | 0.20                          | 0.003                         | <b>0.02</b>               | 0.65                     | 0.84                              | 0.83                            | 0.28                     |
|           | HAPO-TH<br>(N=1155) | Beta | 0.068                         | 1.63                          | 0.97                      | -0.030                   | -0.028                            | 0.035                           | -9.20                    |
|           |                     | P    | 0.71                          | 0.07                          | 0.16                      | 0.78                     | 0.32                              | 0.41                            | 0.20                     |

AC = Afro-Caribbean; EU = European; MA= Mexican-American; TH=Thai

**Supplemental Table 4. Characteristics of Partners Biobank  
Participants in the T2D Case-Control Set**

|                          | <b>No T2D (N = 28206)</b> | <b>T2D (N = 4910)</b>     |
|--------------------------|---------------------------|---------------------------|
|                          | <b>Mean (SD) or N (%)</b> | <b>Mean (SD) or N (%)</b> |
| Age (years)              | 57.5 (17.2)               | 67.1 (12.4)               |
| Gender                   |                           |                           |
| Female                   | 15514 (55.0%)             | 2147 (44.2%)              |
| Male                     | 12691 (44.6%)             | 2708 (55.8%)              |
| BMI (kg/m <sup>2</sup> ) | 28.1 (11.0)               | 32.2 (8.7)                |
| Race/Ethnicity           |                           |                           |
| Non-Hispanic White       | 24604 (87.2%)             | 3911 (79.7%)              |
| Non-Hispanic Black       | 970 (3.4%)                | 405 (8.2%)                |
| Non-Hispanic Asian       | 557 (2.0%)                | 63 (1.3%)                 |
| Hispanic/Latino          | 908 (3.2%)                | 311 (6.3%)                |
| Other/Unknown            | 1167 (4.1%)               | 220 (4.5%)                |

A T2D case-control cohort was selected from the Partners Biobank to test clusters for associations with hyperglycemia outside of pregnancy. T2D status, as previously described (References 12 and 19), was derived from structured and unstructured electronic medical record data using clinical, computational, and statistical methods. Case criteria had positive predictive value of 0.90 against the gold standard of chart review. Initial control criteria provided by the Partners Biobank had negative predictive value of 0.99 against the gold standard of chart review. In addition, we eliminated any control participants with any hemoglobin A1c recorded  $\geq 6.5\%$  in the electronic medical record.
