# Supplementary material
Source: publisher figshare collection journal article supplement (https://diabetesjournals.figshare.com/articles/dataset/_/13073054)
Supplement: Supplementary file 2 [file 1]

Supplemental Figure 1: Associations between Udler Cluster Polygenic Scores and Birthweight Percentile

A

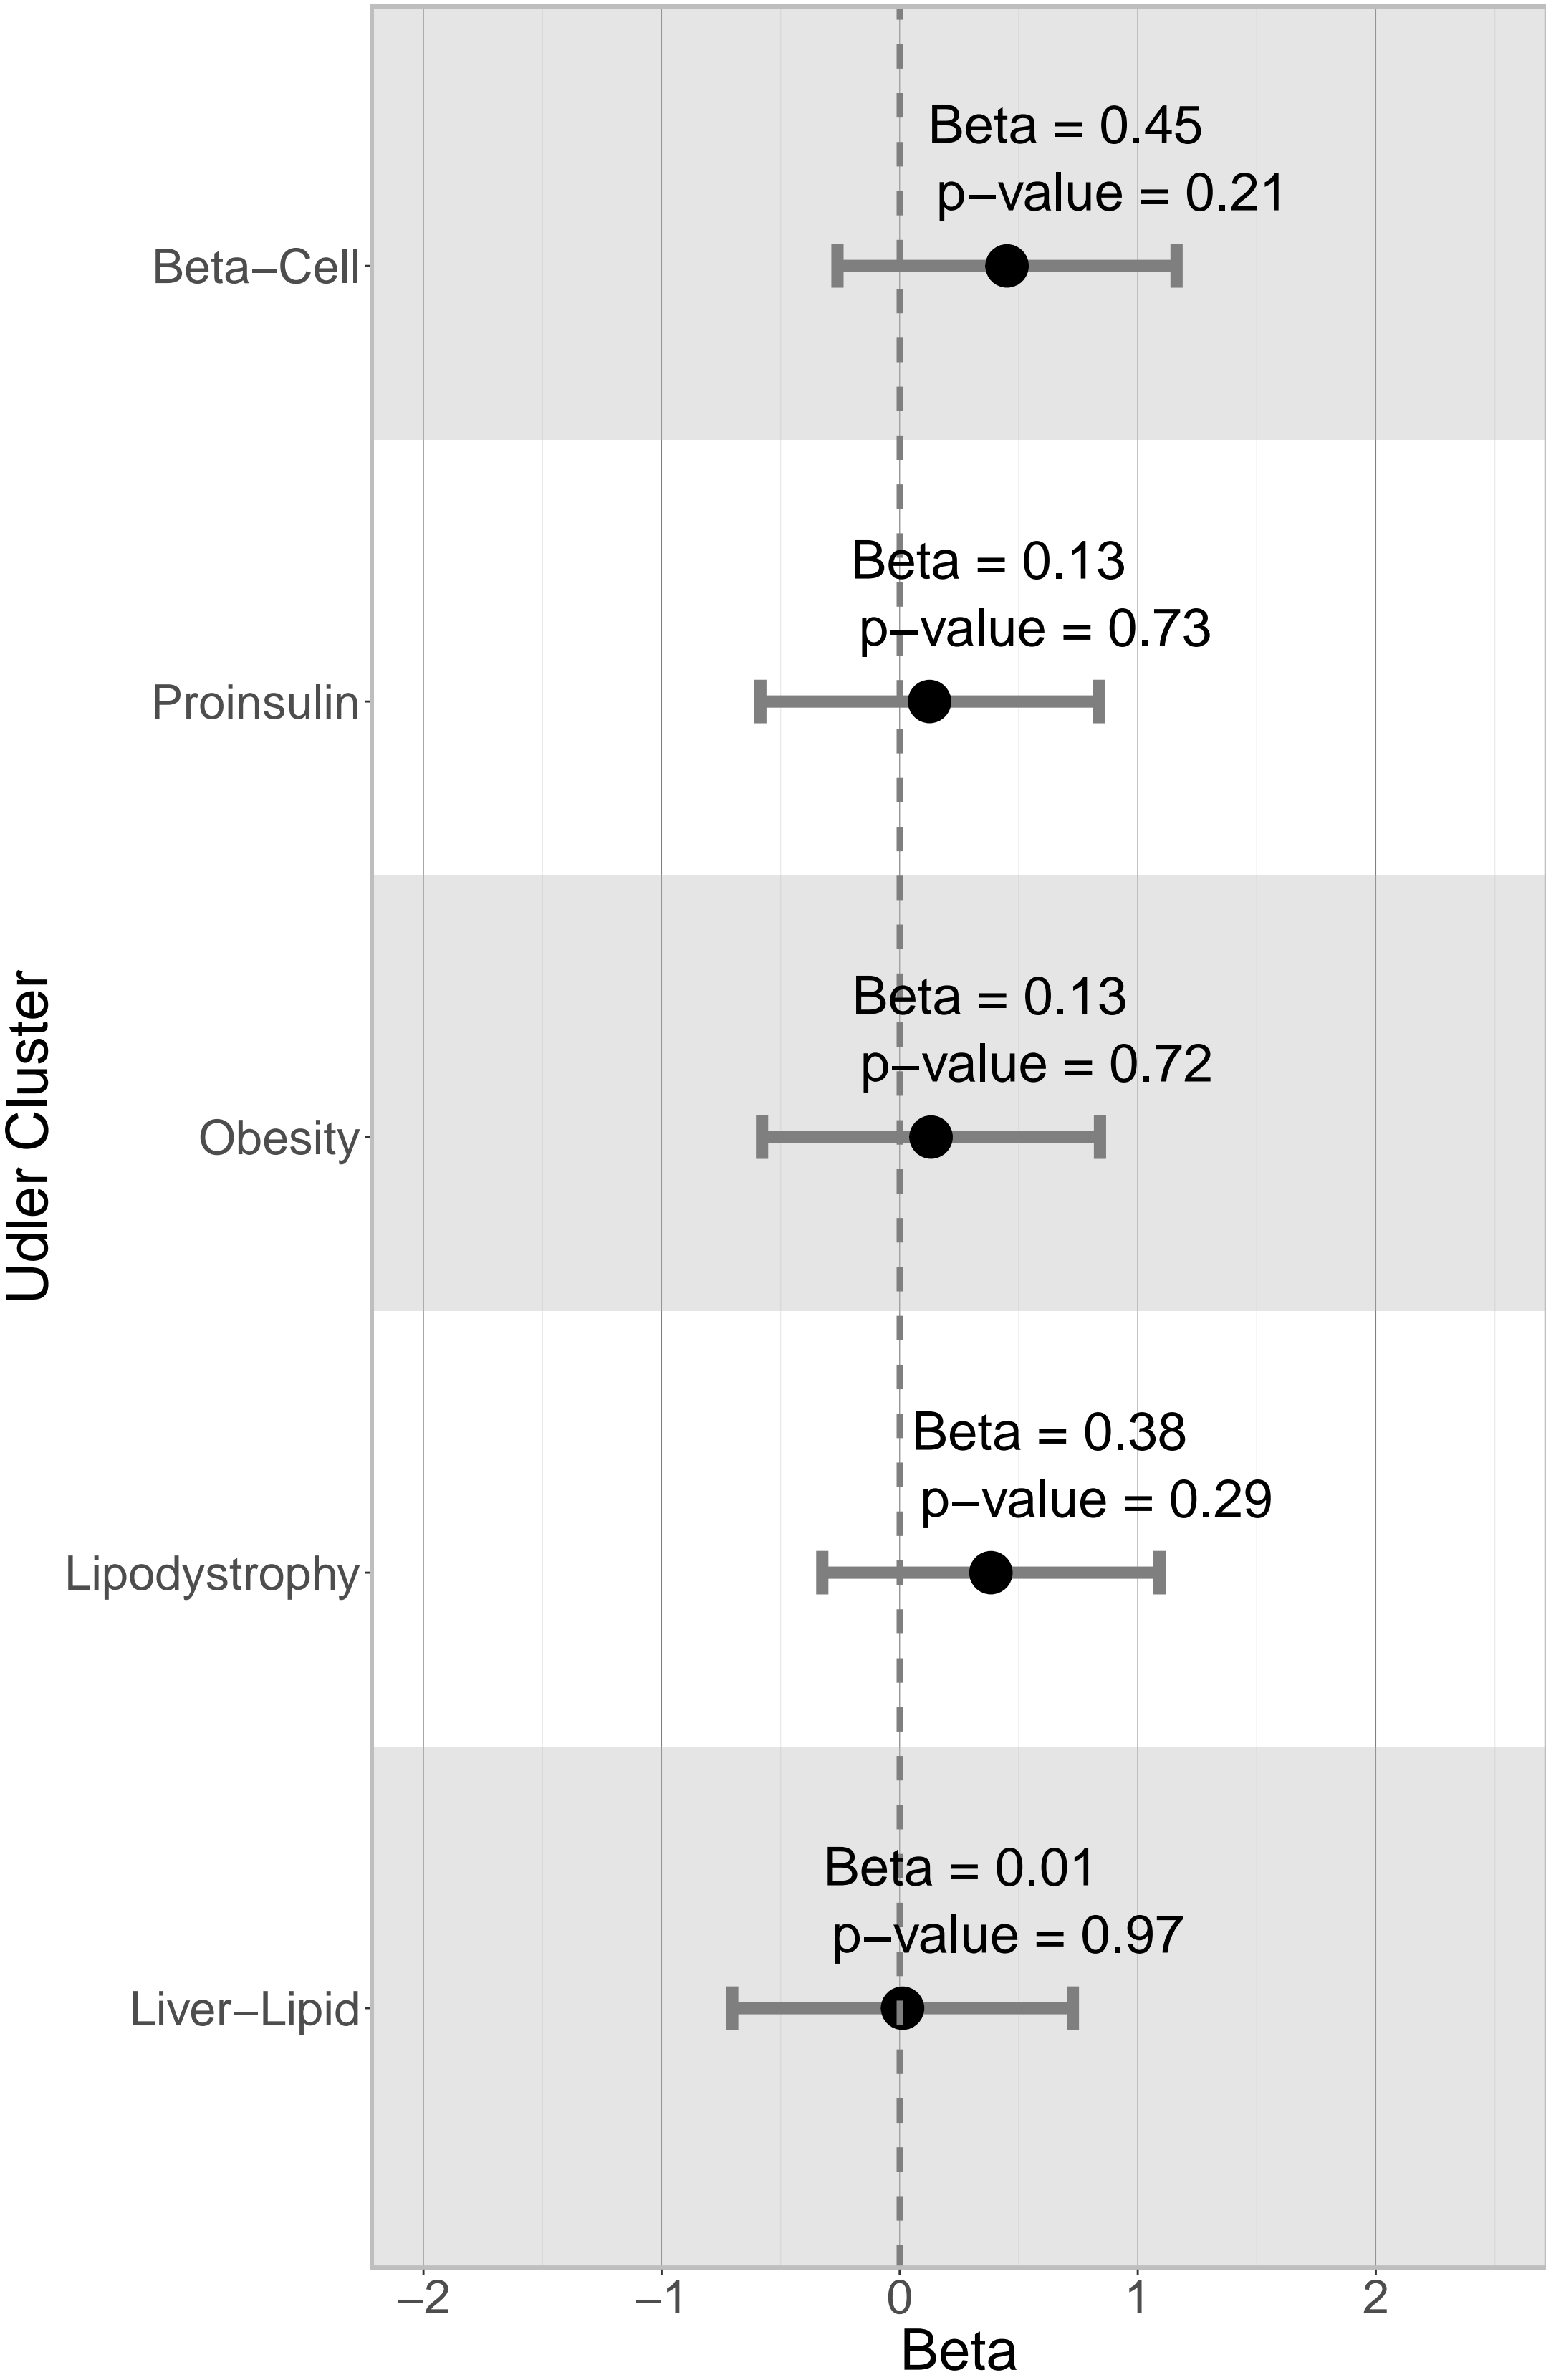

B

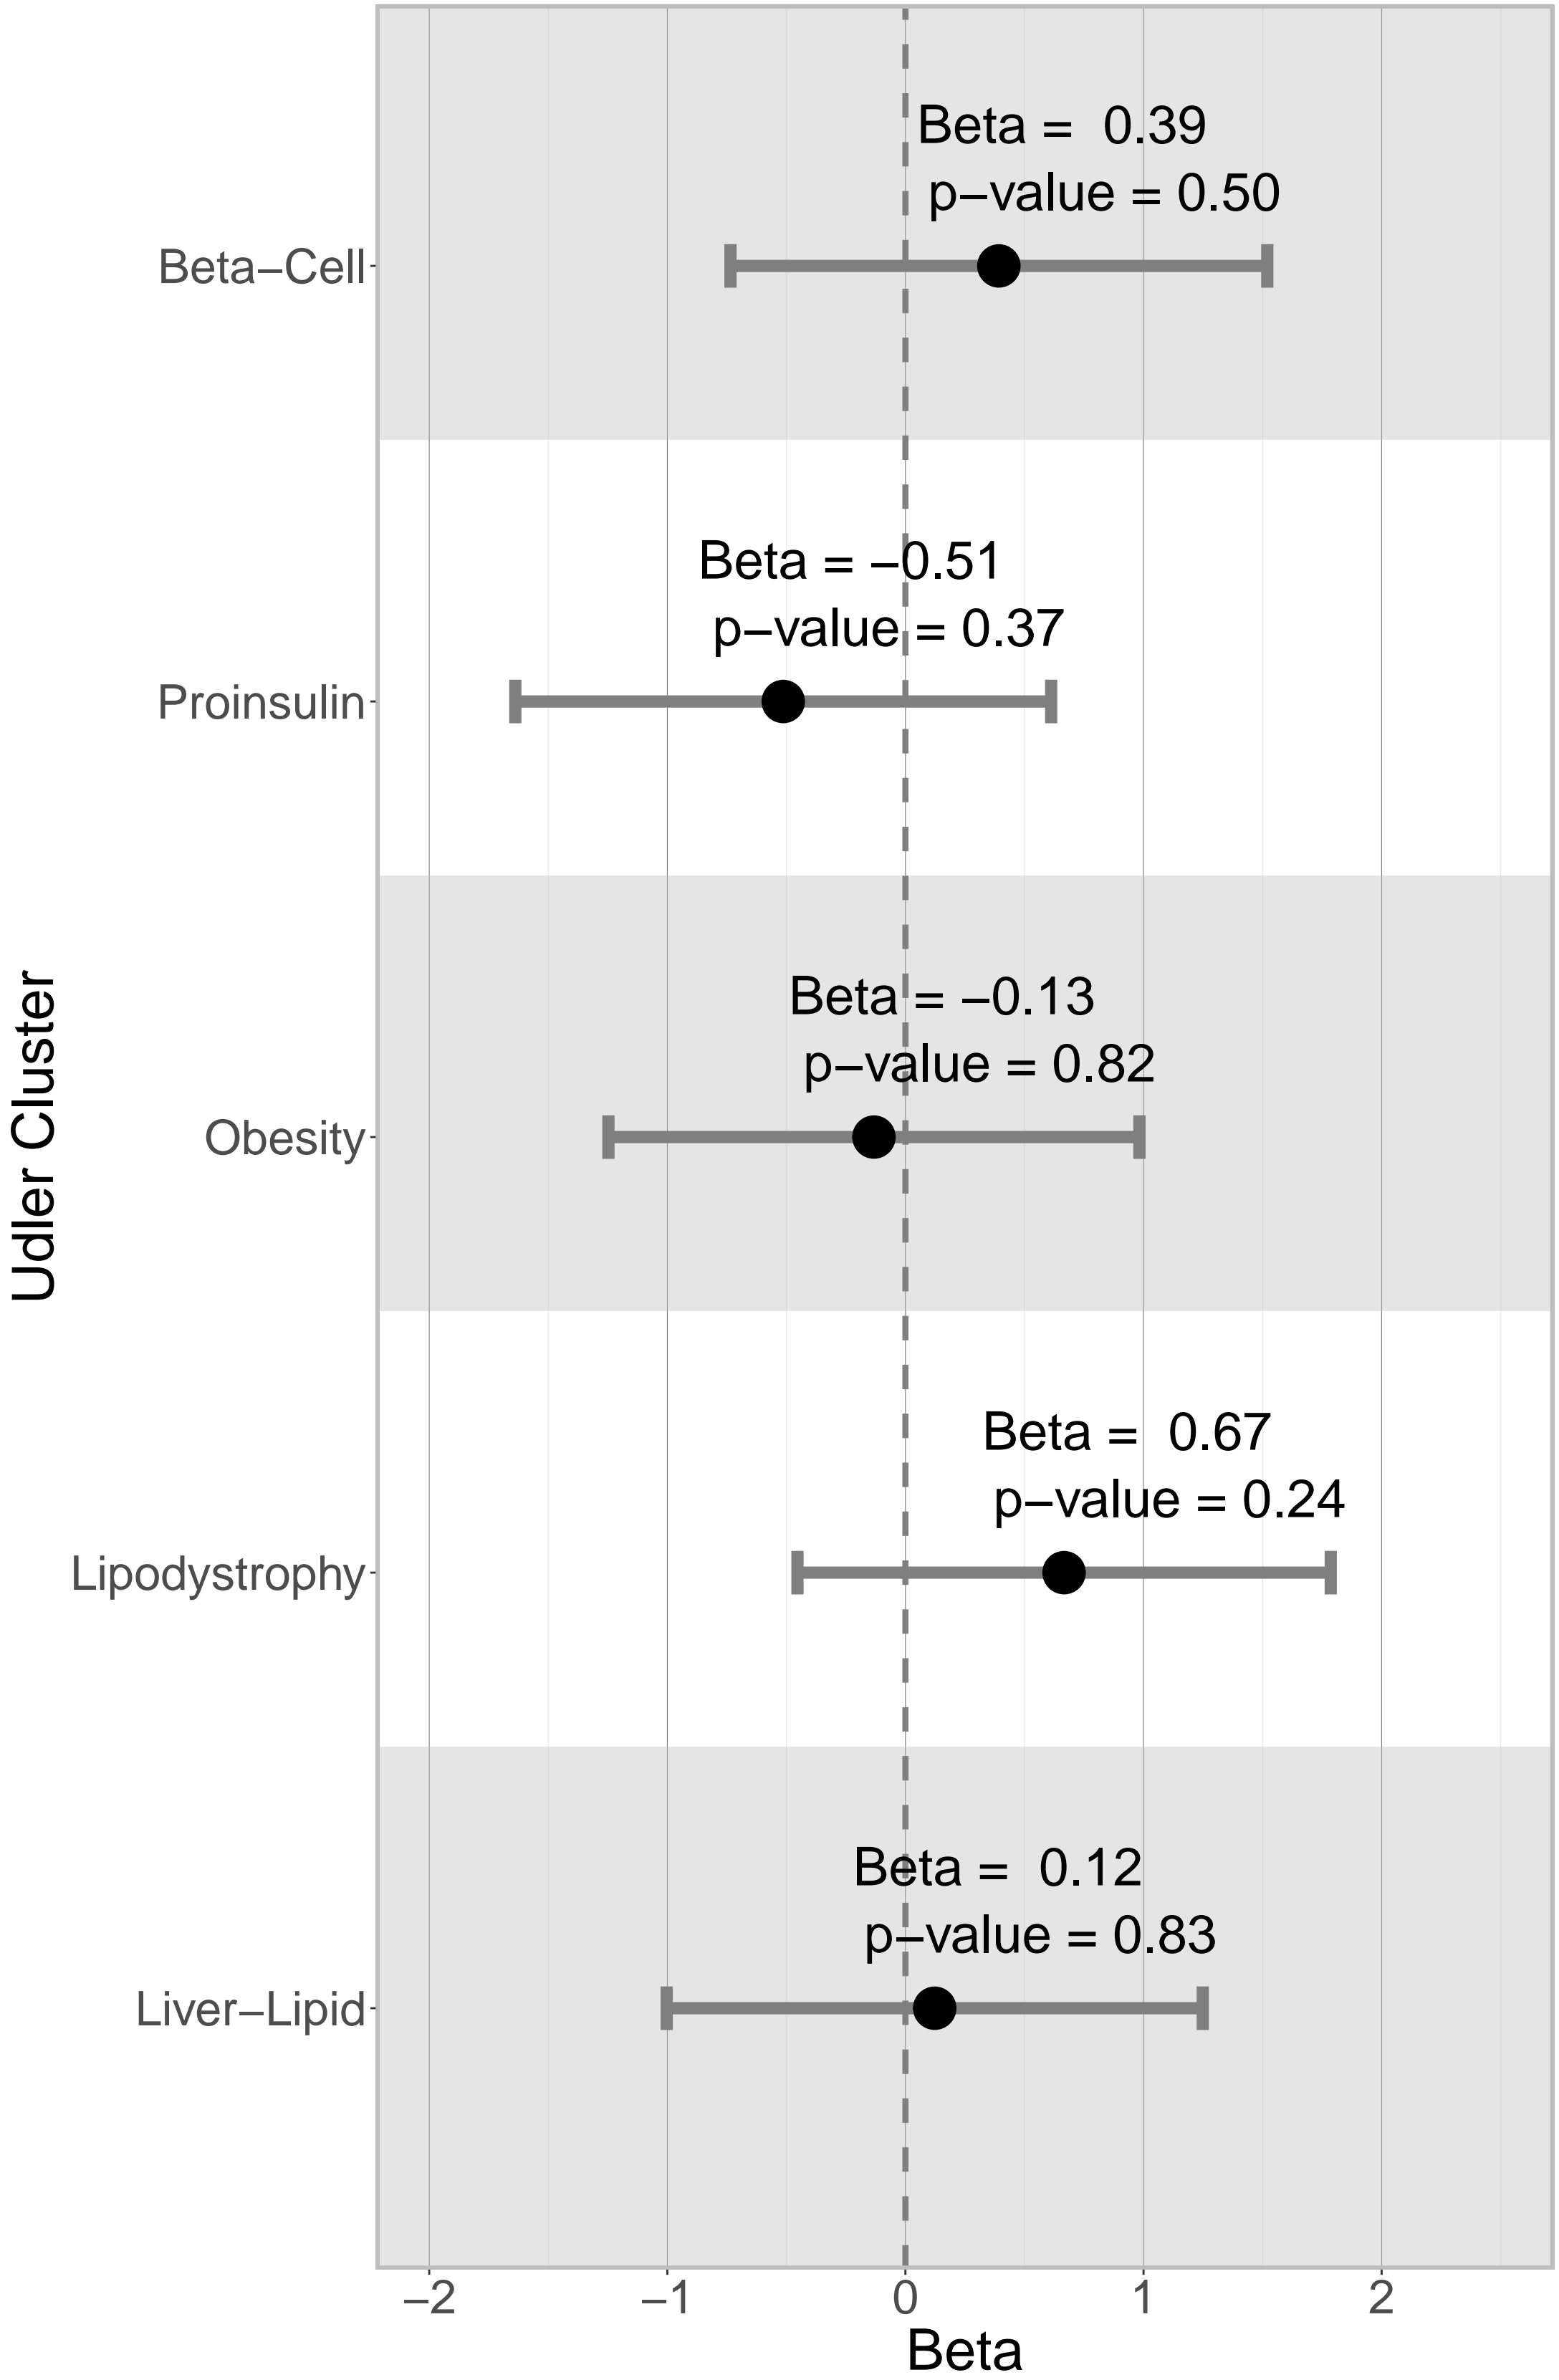

Here shown are the results from meta-analyses of associations between Udler Cluster Polygenic Scores and Birthweight Percentile. In the meta-analyses depicted in Panel A, all cohorts (Gen3G, HAPO-AC, HAPO-EU, HAPO-MA, HAPO-TH, and MGH<sup>2</sup>) are included. In the meta-analyses depicted in Panel B, cohorts with presumed European-predominant ancestry (Gen3G, HAPO-EU, and MGH<sup>2</sup>) are included. Prior to meta-analysis, associations from linear regression were adjusted for principal components and age. In the MGH<sup>2</sup> cohort we also adjusted for genotyping/imputation batch. Betas are depicted by black circles. Error bars provide the 95% confidence interval for the beta. P-values <0.01 were considered statistically significant.

Supplemental Figure 1: Associations between Pregnancy Cluster Polygenic Scores and Birthweight Percentile

C

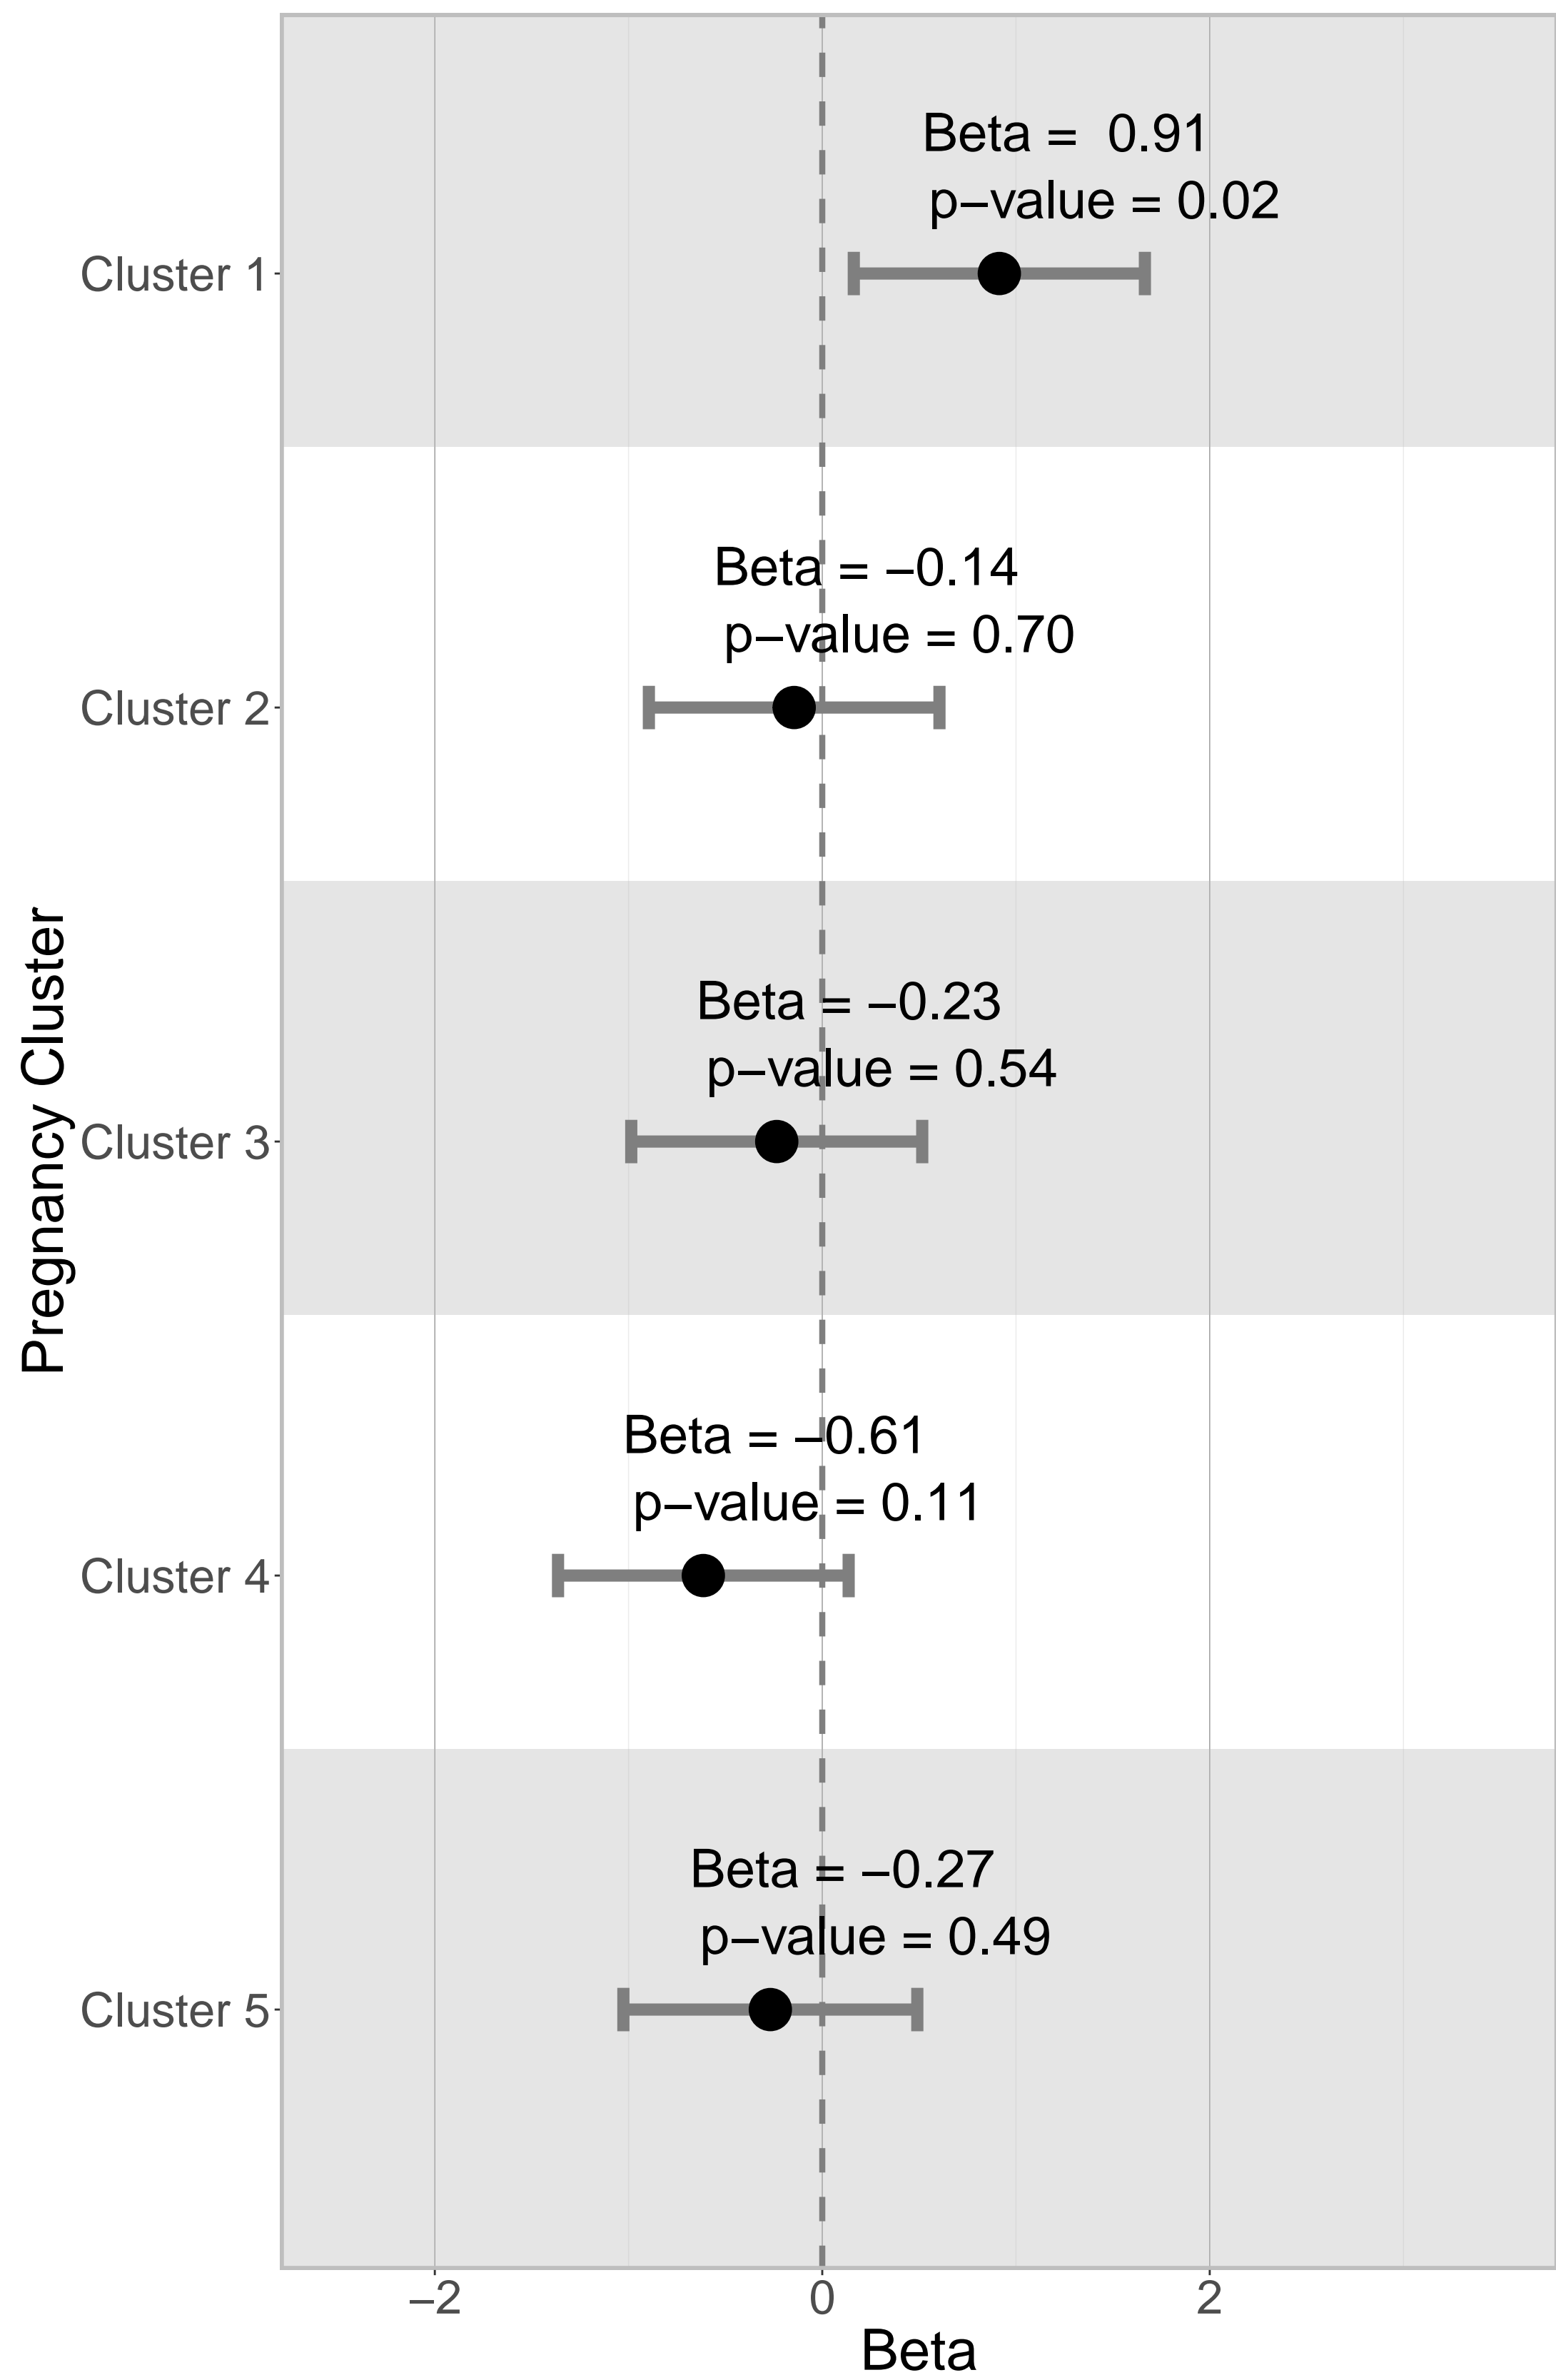

D

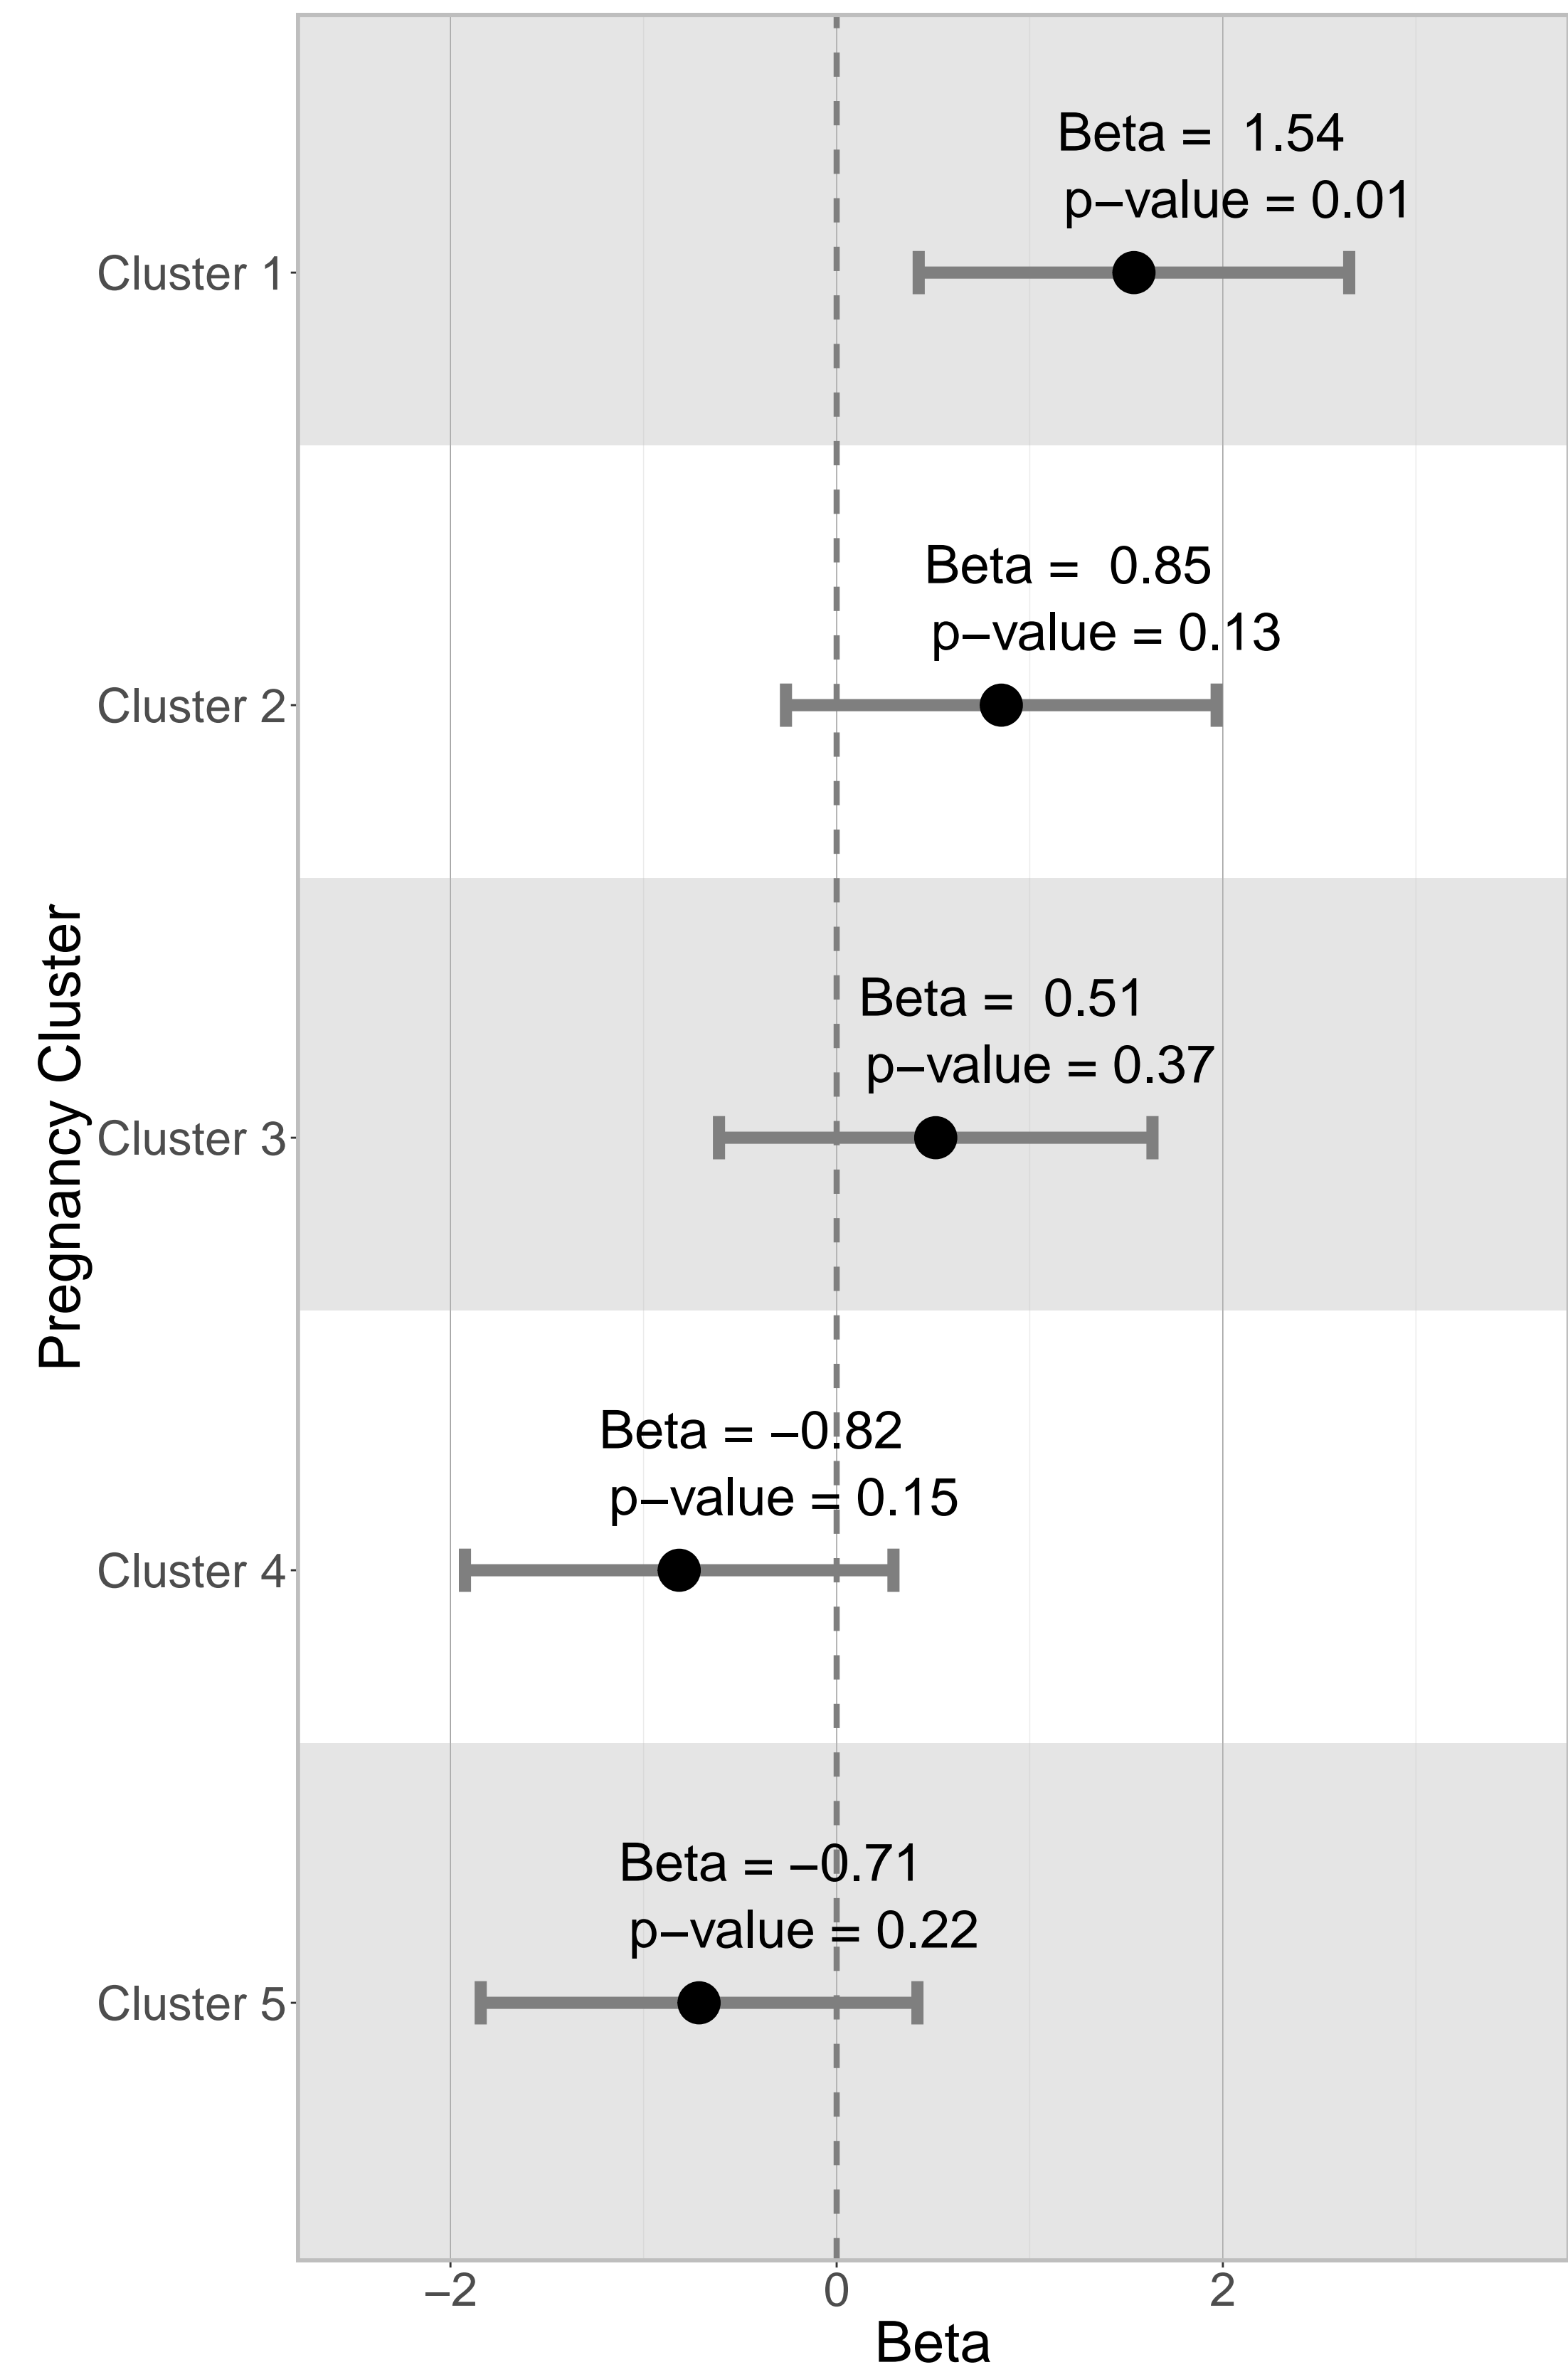

Here shown are the results from meta-analyses of associations between Pregnancy Cluster Polygenic Scores and Birthweight Percentile. In the meta-analyses depicted in Panel A, all cohorts (Gen3G, HAPO-AC, HAPO-EU, HAPO-MA, HAPO-TH, and MGH<sup>2</sup>) are included. In the meta-analyses depicted in Panel B, cohorts with presumed European-predominant ancestry (Gen3G, HAPO-EU, and MGH<sup>2</sup>) are included. Prior to meta-analysis, associations from linear regression were adjusted for principal components and age. In the MGH<sup>2</sup> cohort we also adjusted for genotyping/imputation batch. Betas are depicted by black circles. Error bars provide the 95% confidence interval for the beta. P-values <0.01 were considered statistically significant.

Supplemental Figure 2A: Heat Maps Generated in bNMF Clustering of Variants and Glycemic Traits in Pregnancy

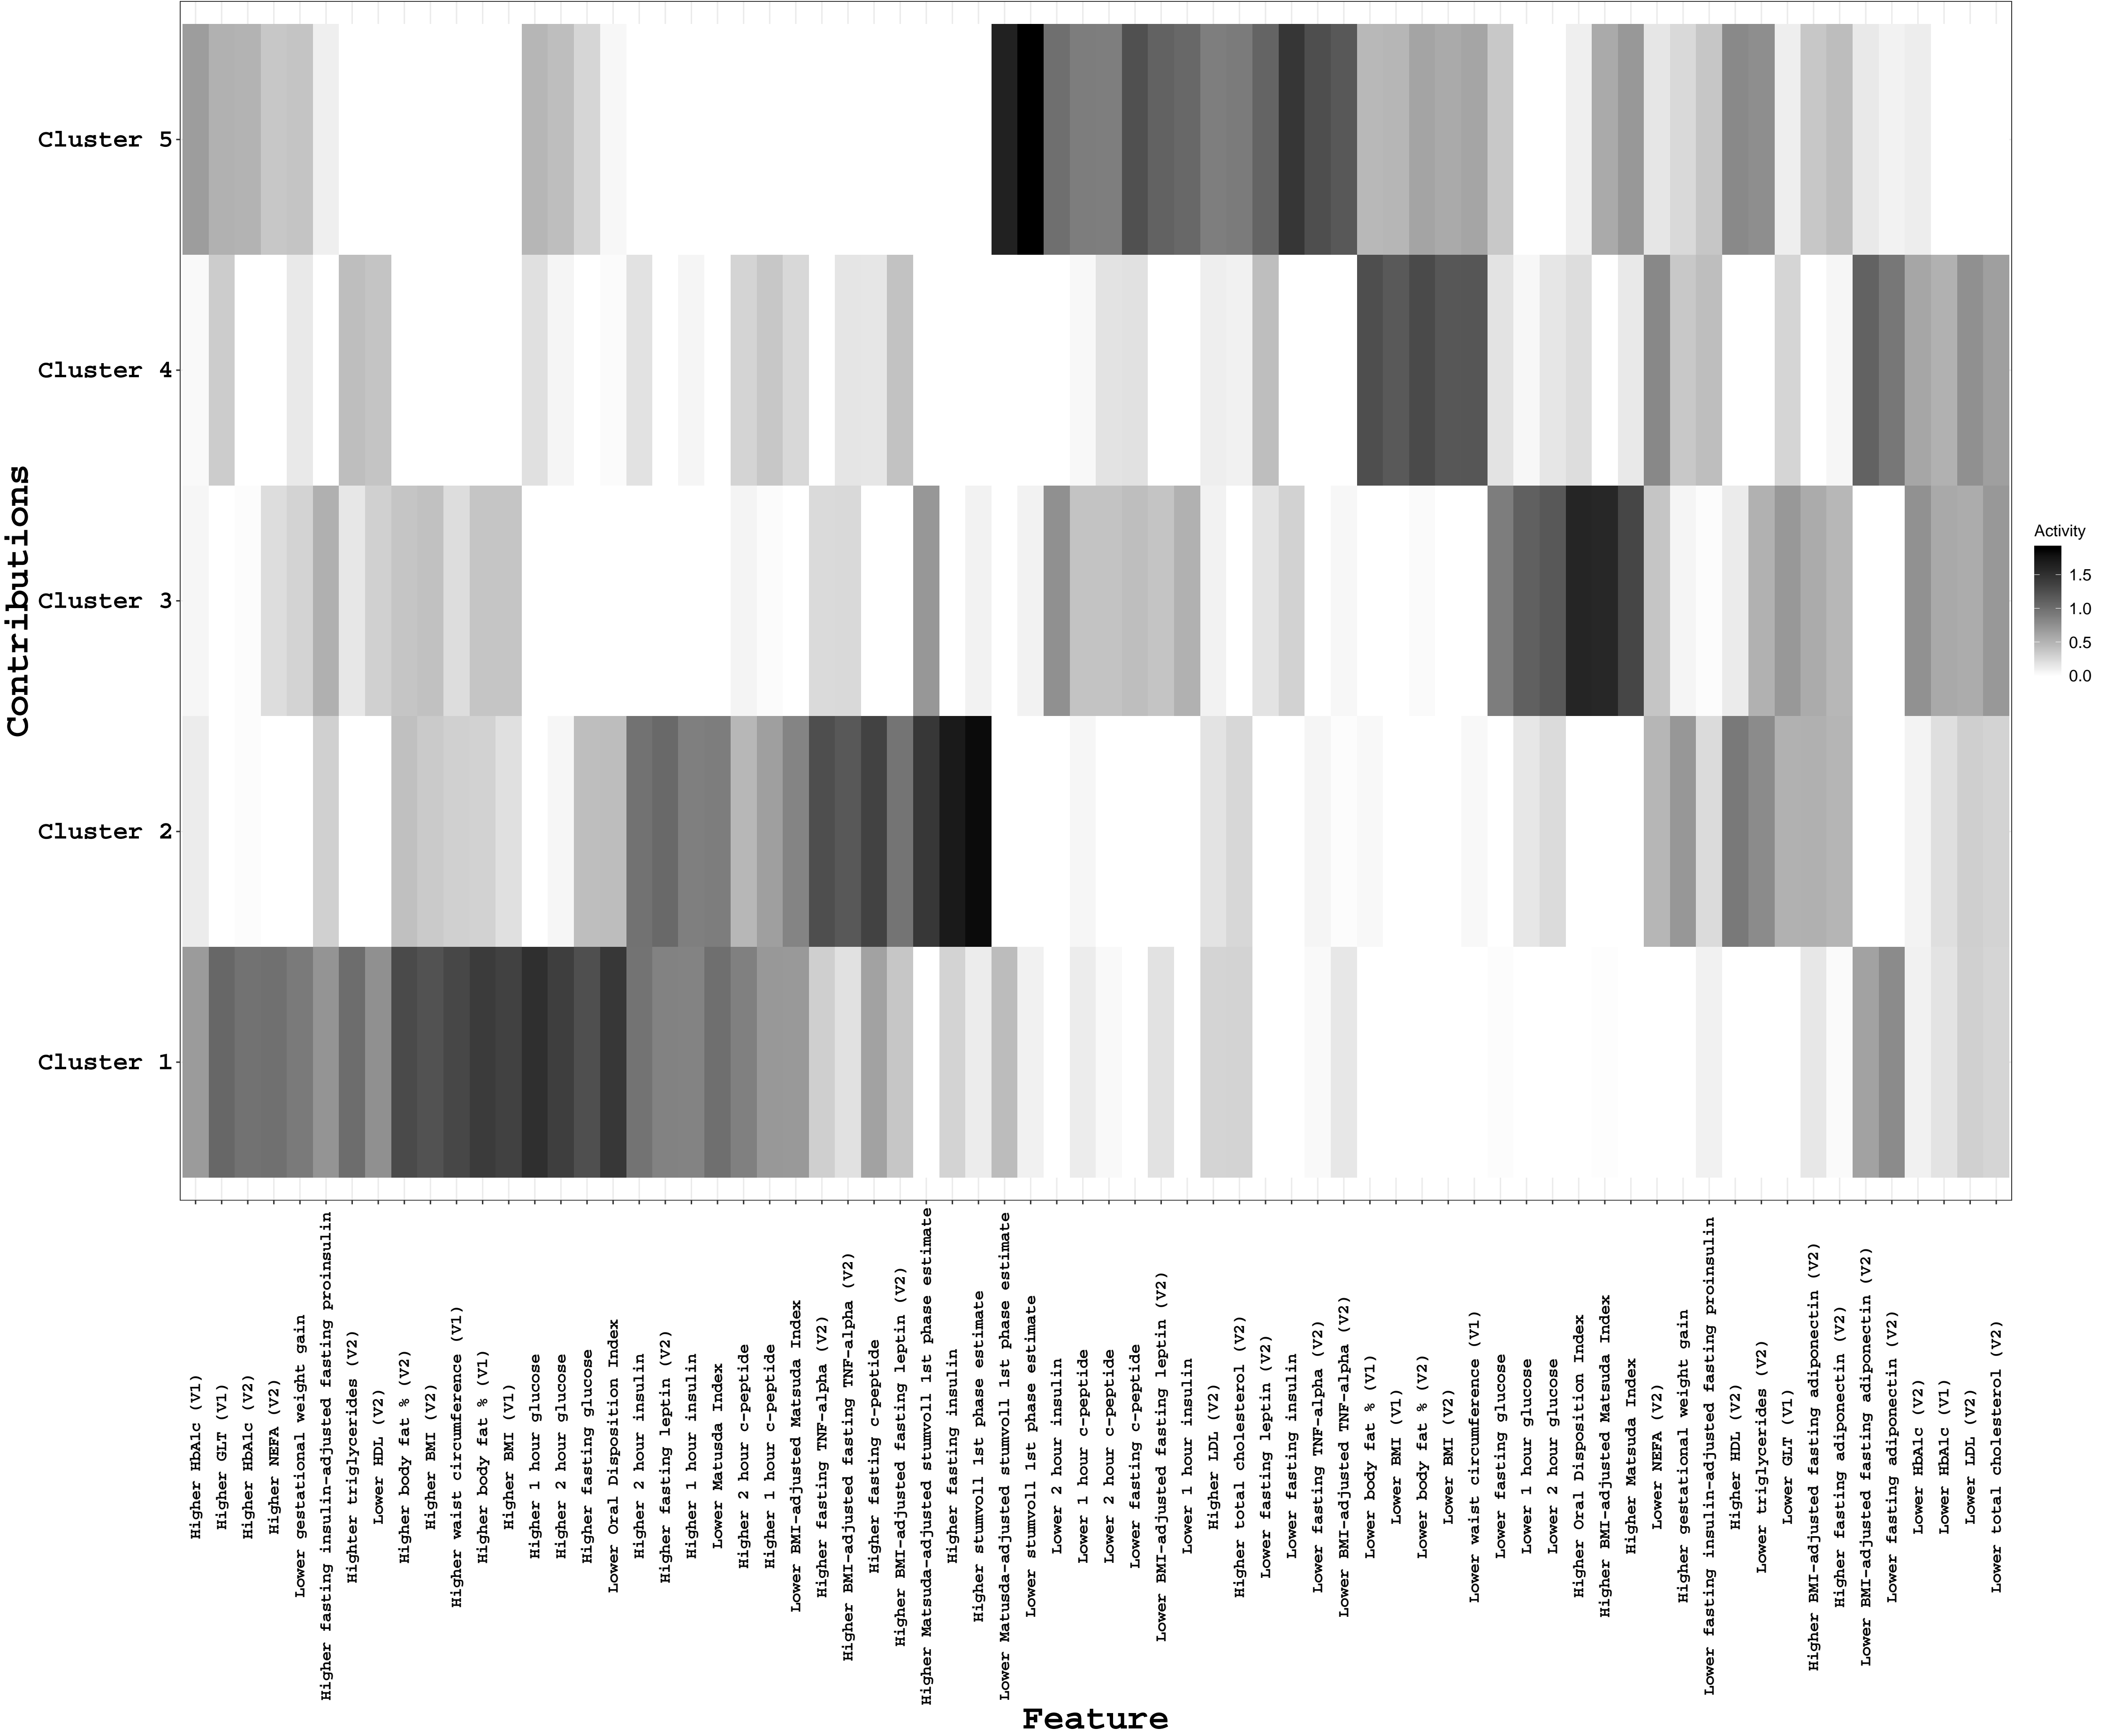

**Supplemental Figure 2B: Heat Maps Generated in bNMF Clustering of Variants and Glycemic Traits in Pregnancy**

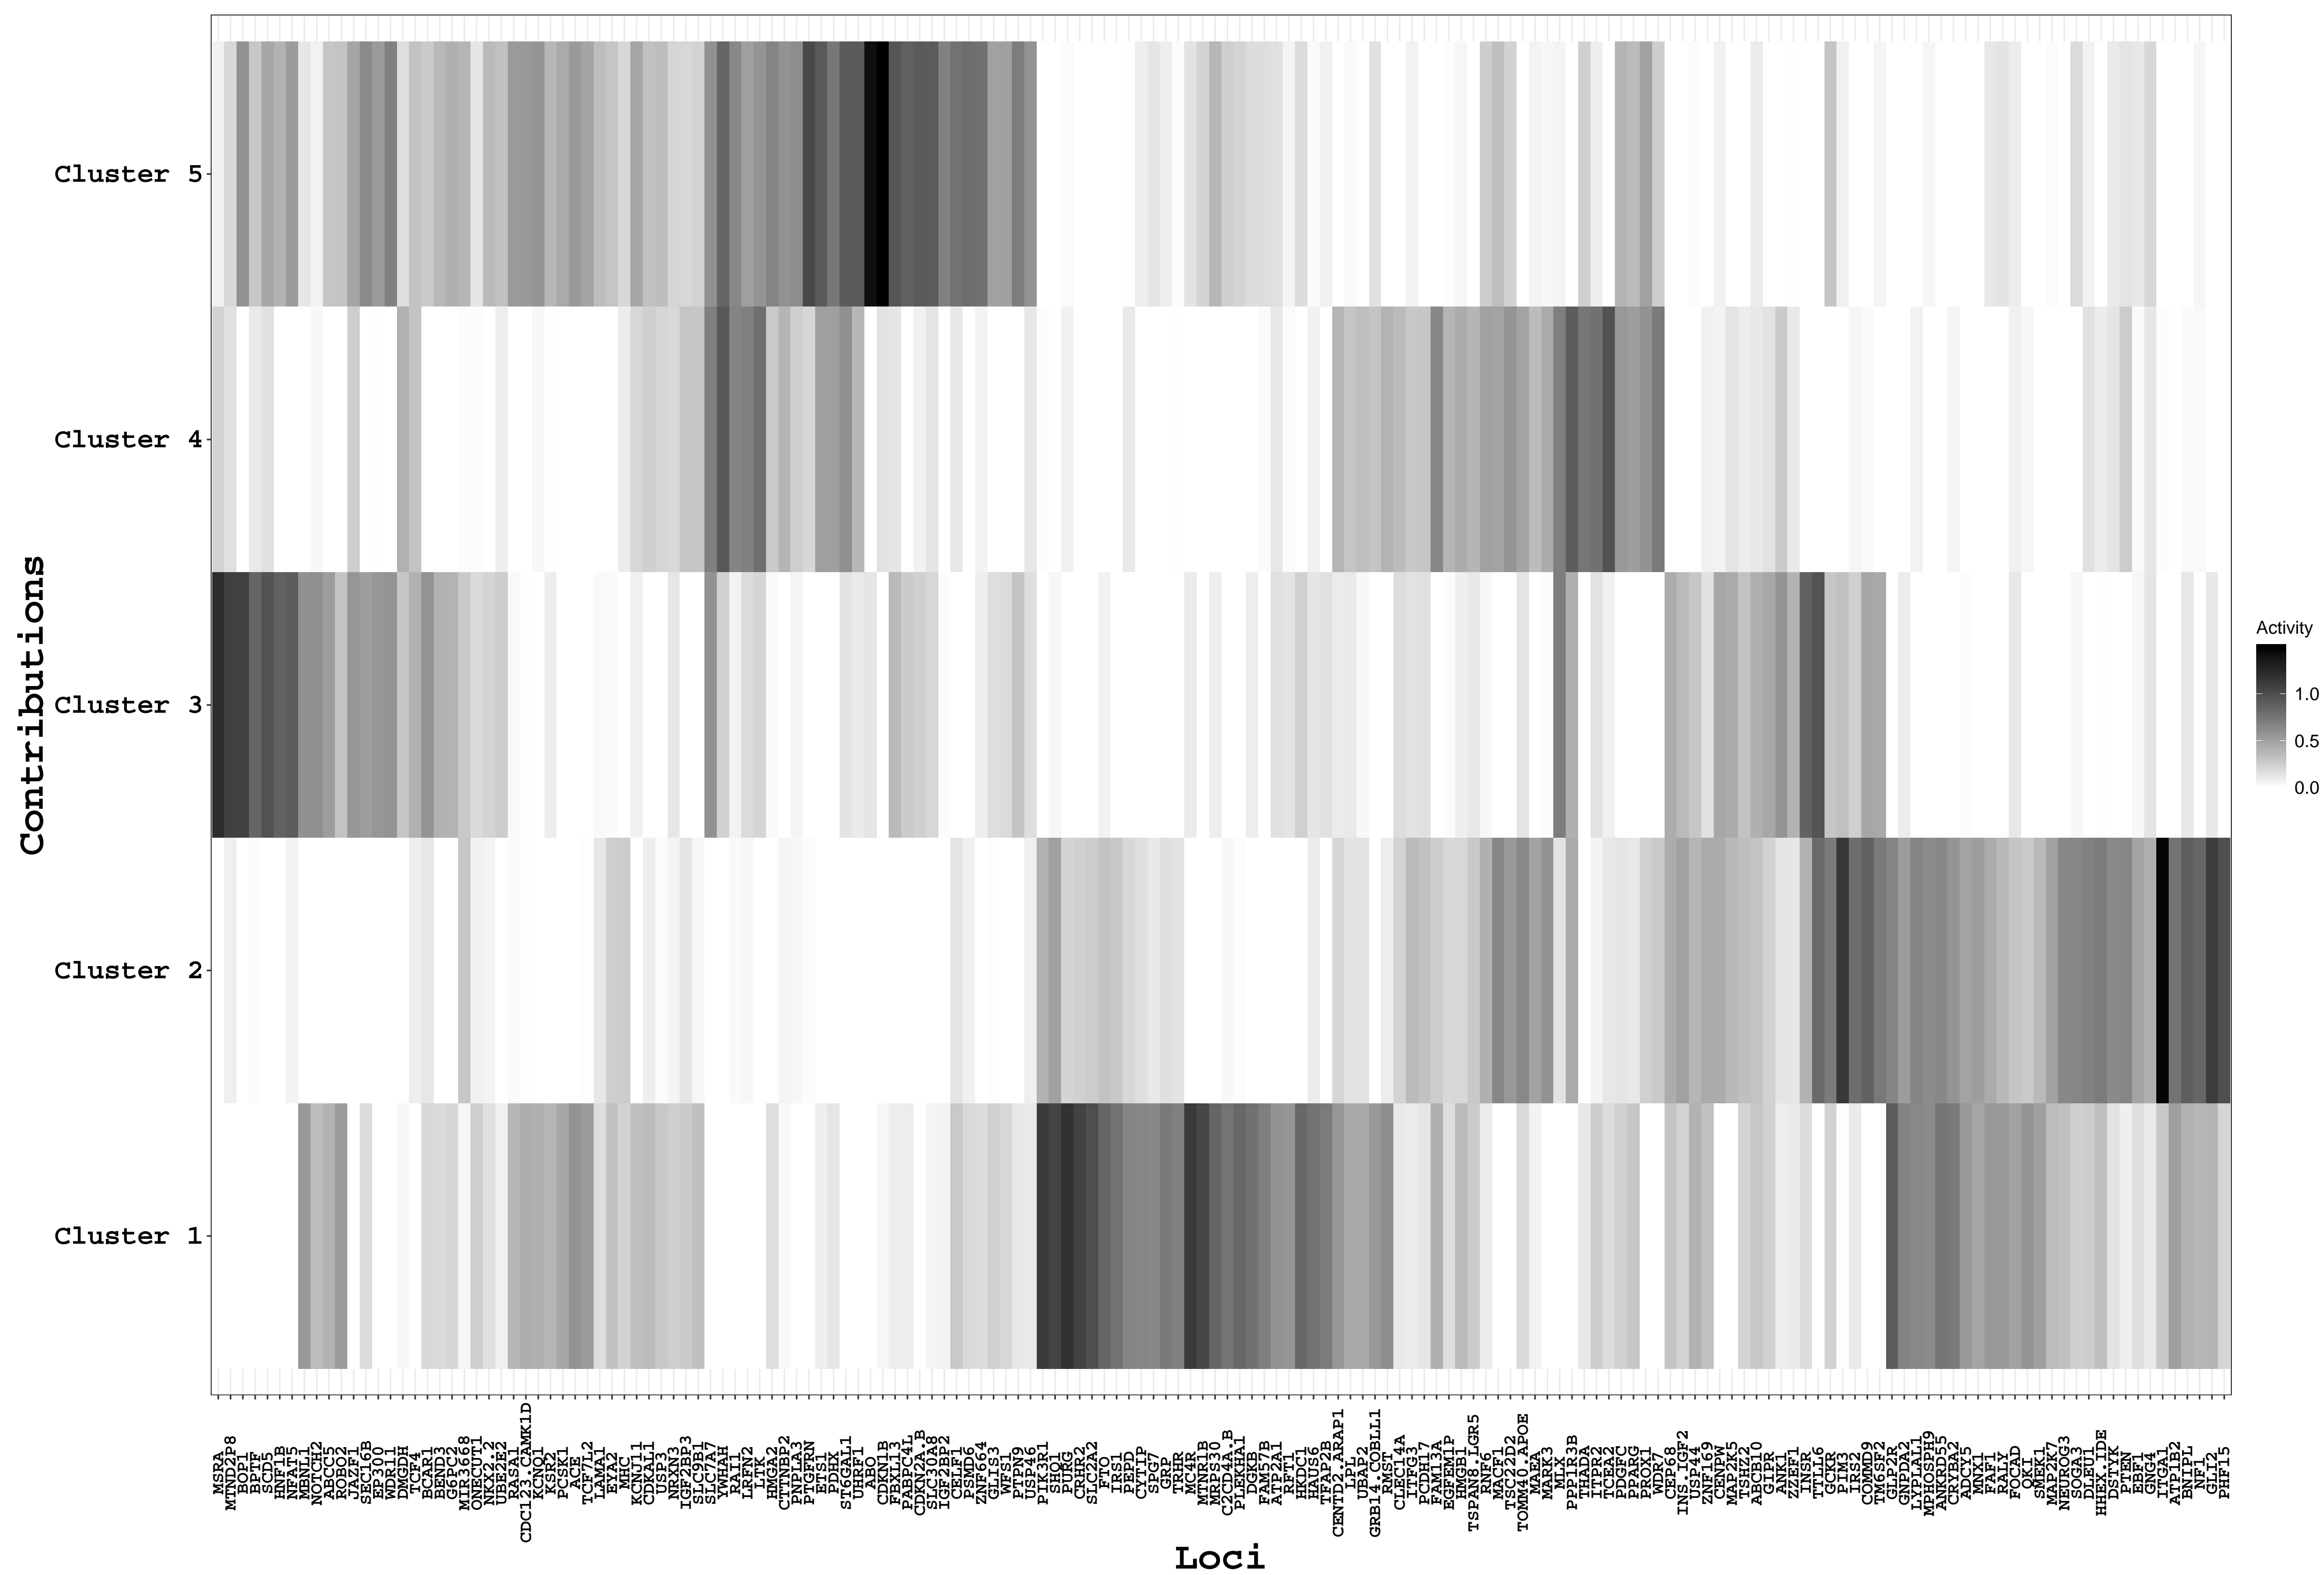

Supplemental Figure 3: Comparison of Cluster Polygenetic Score Associations with GDM and T2D in Presumed European Ancestry–Predominant Cohorts

A

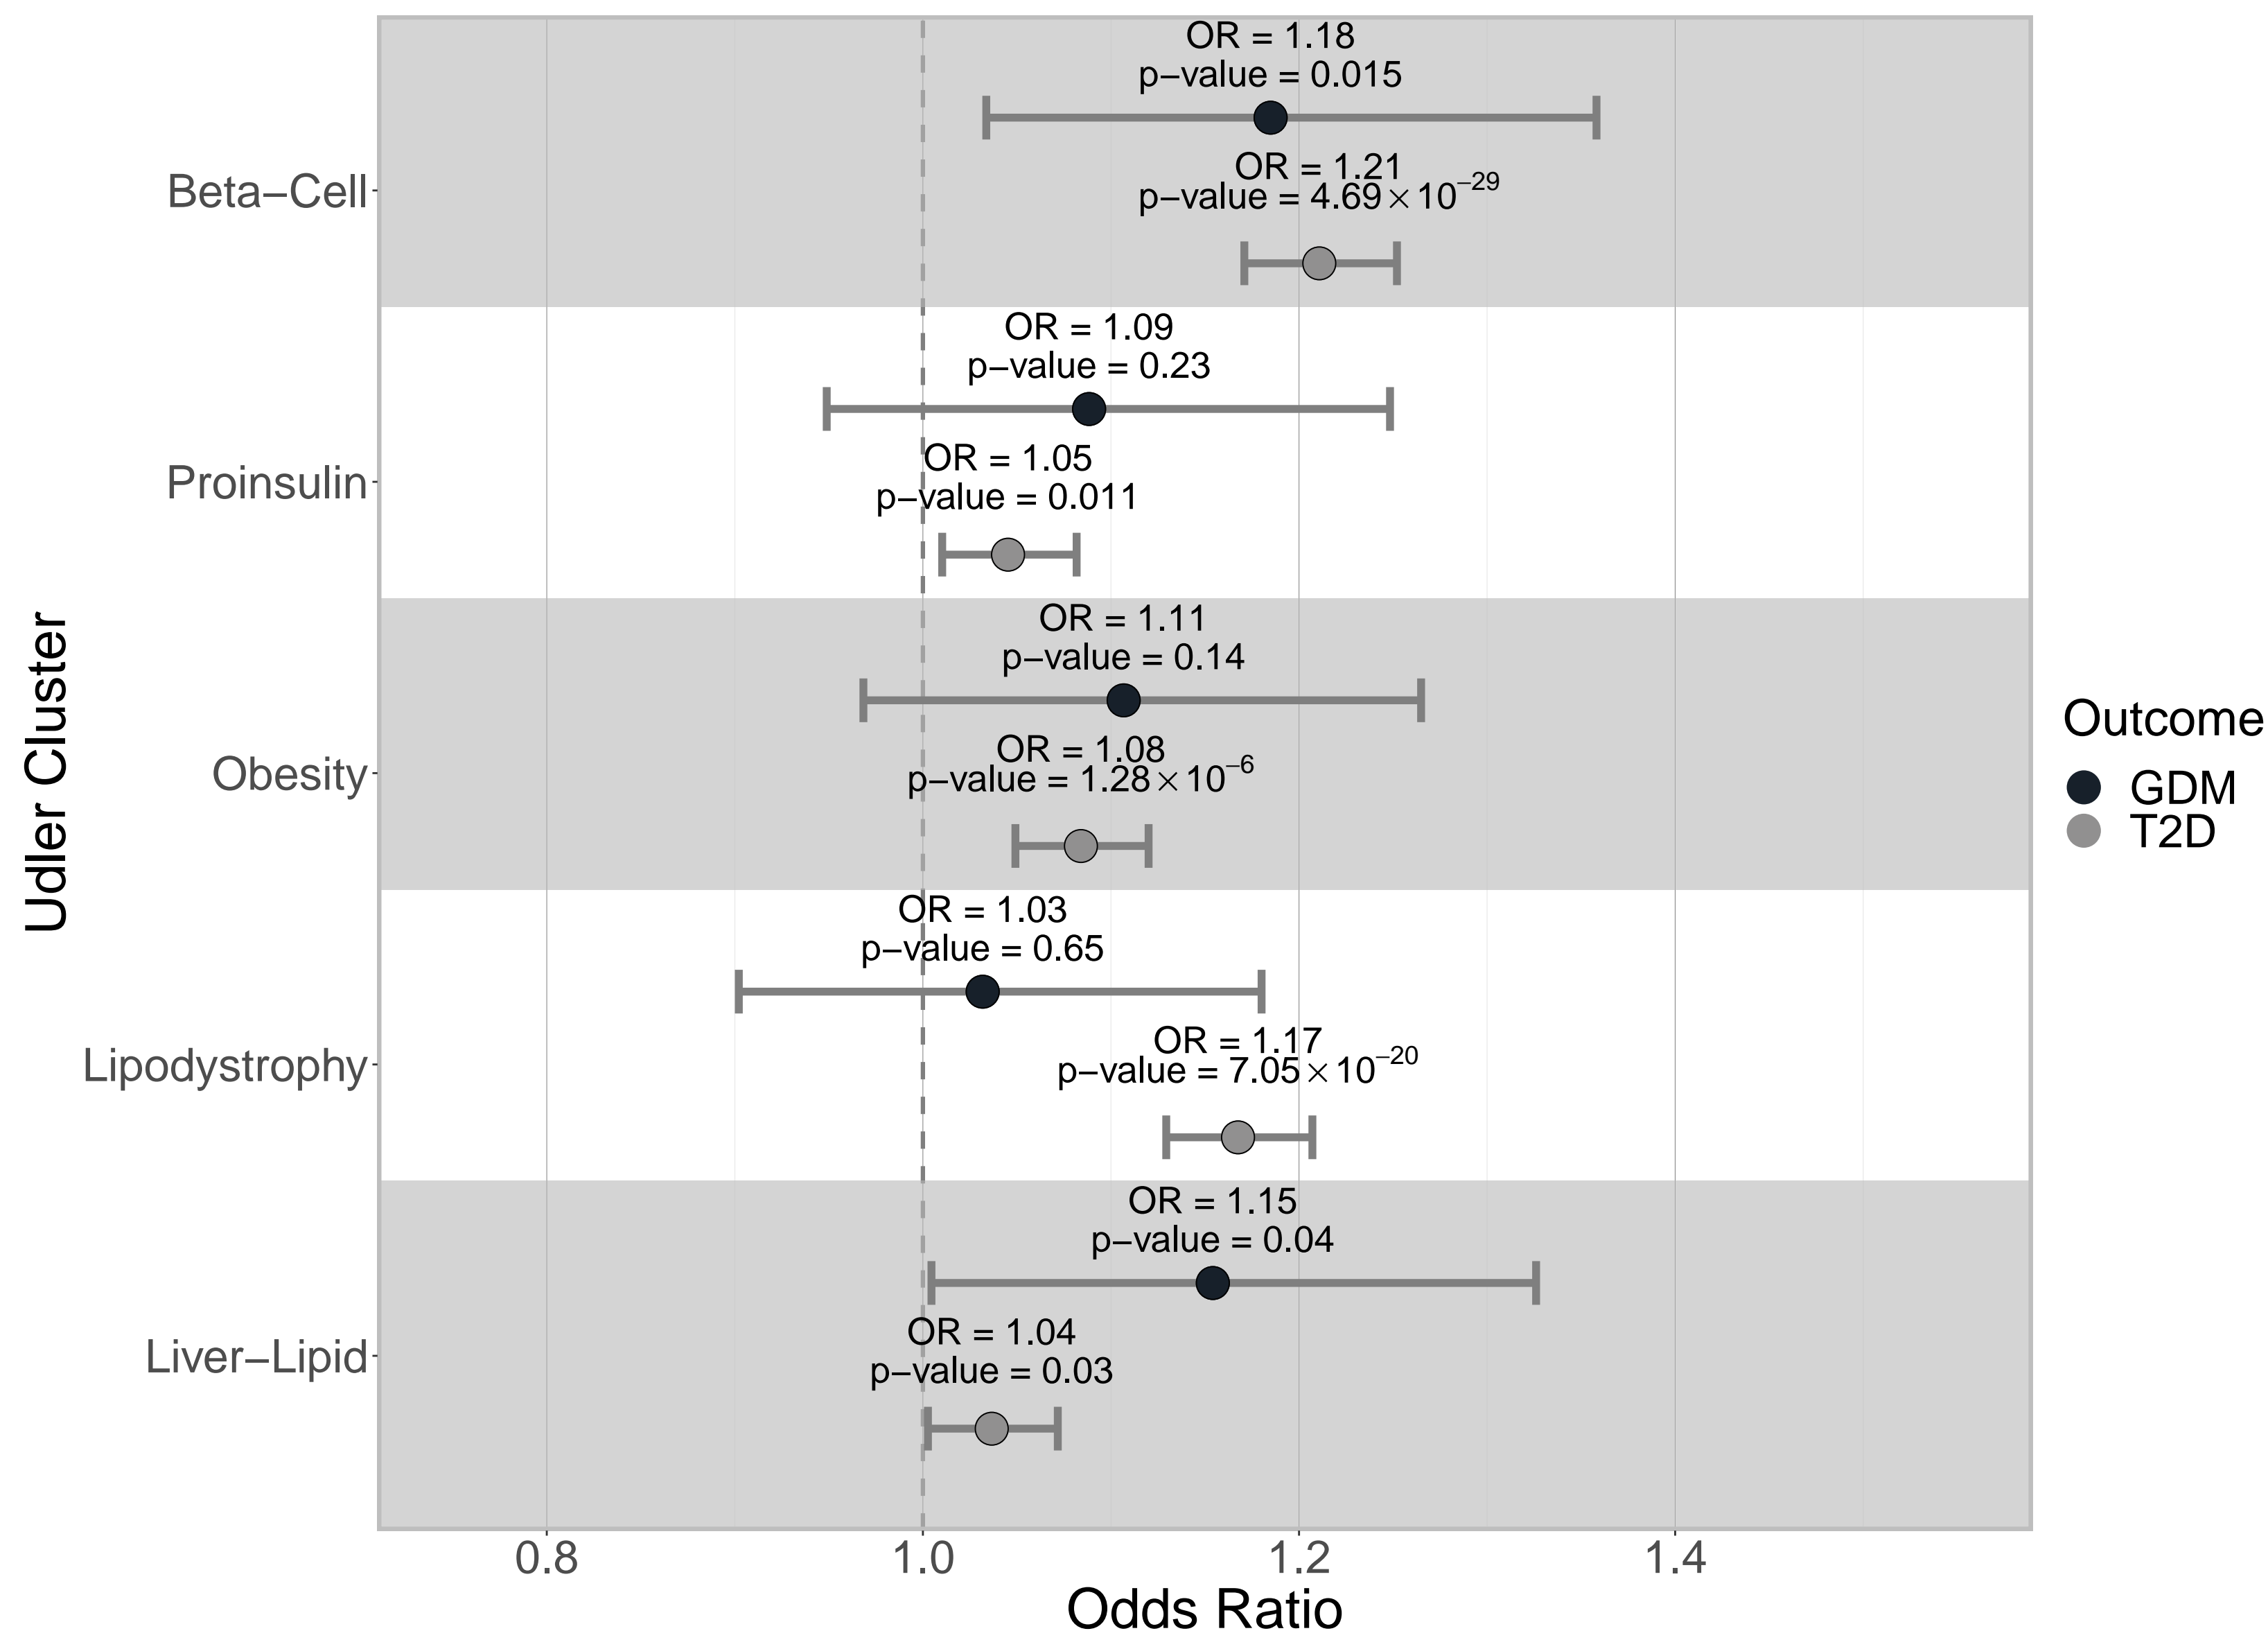

B

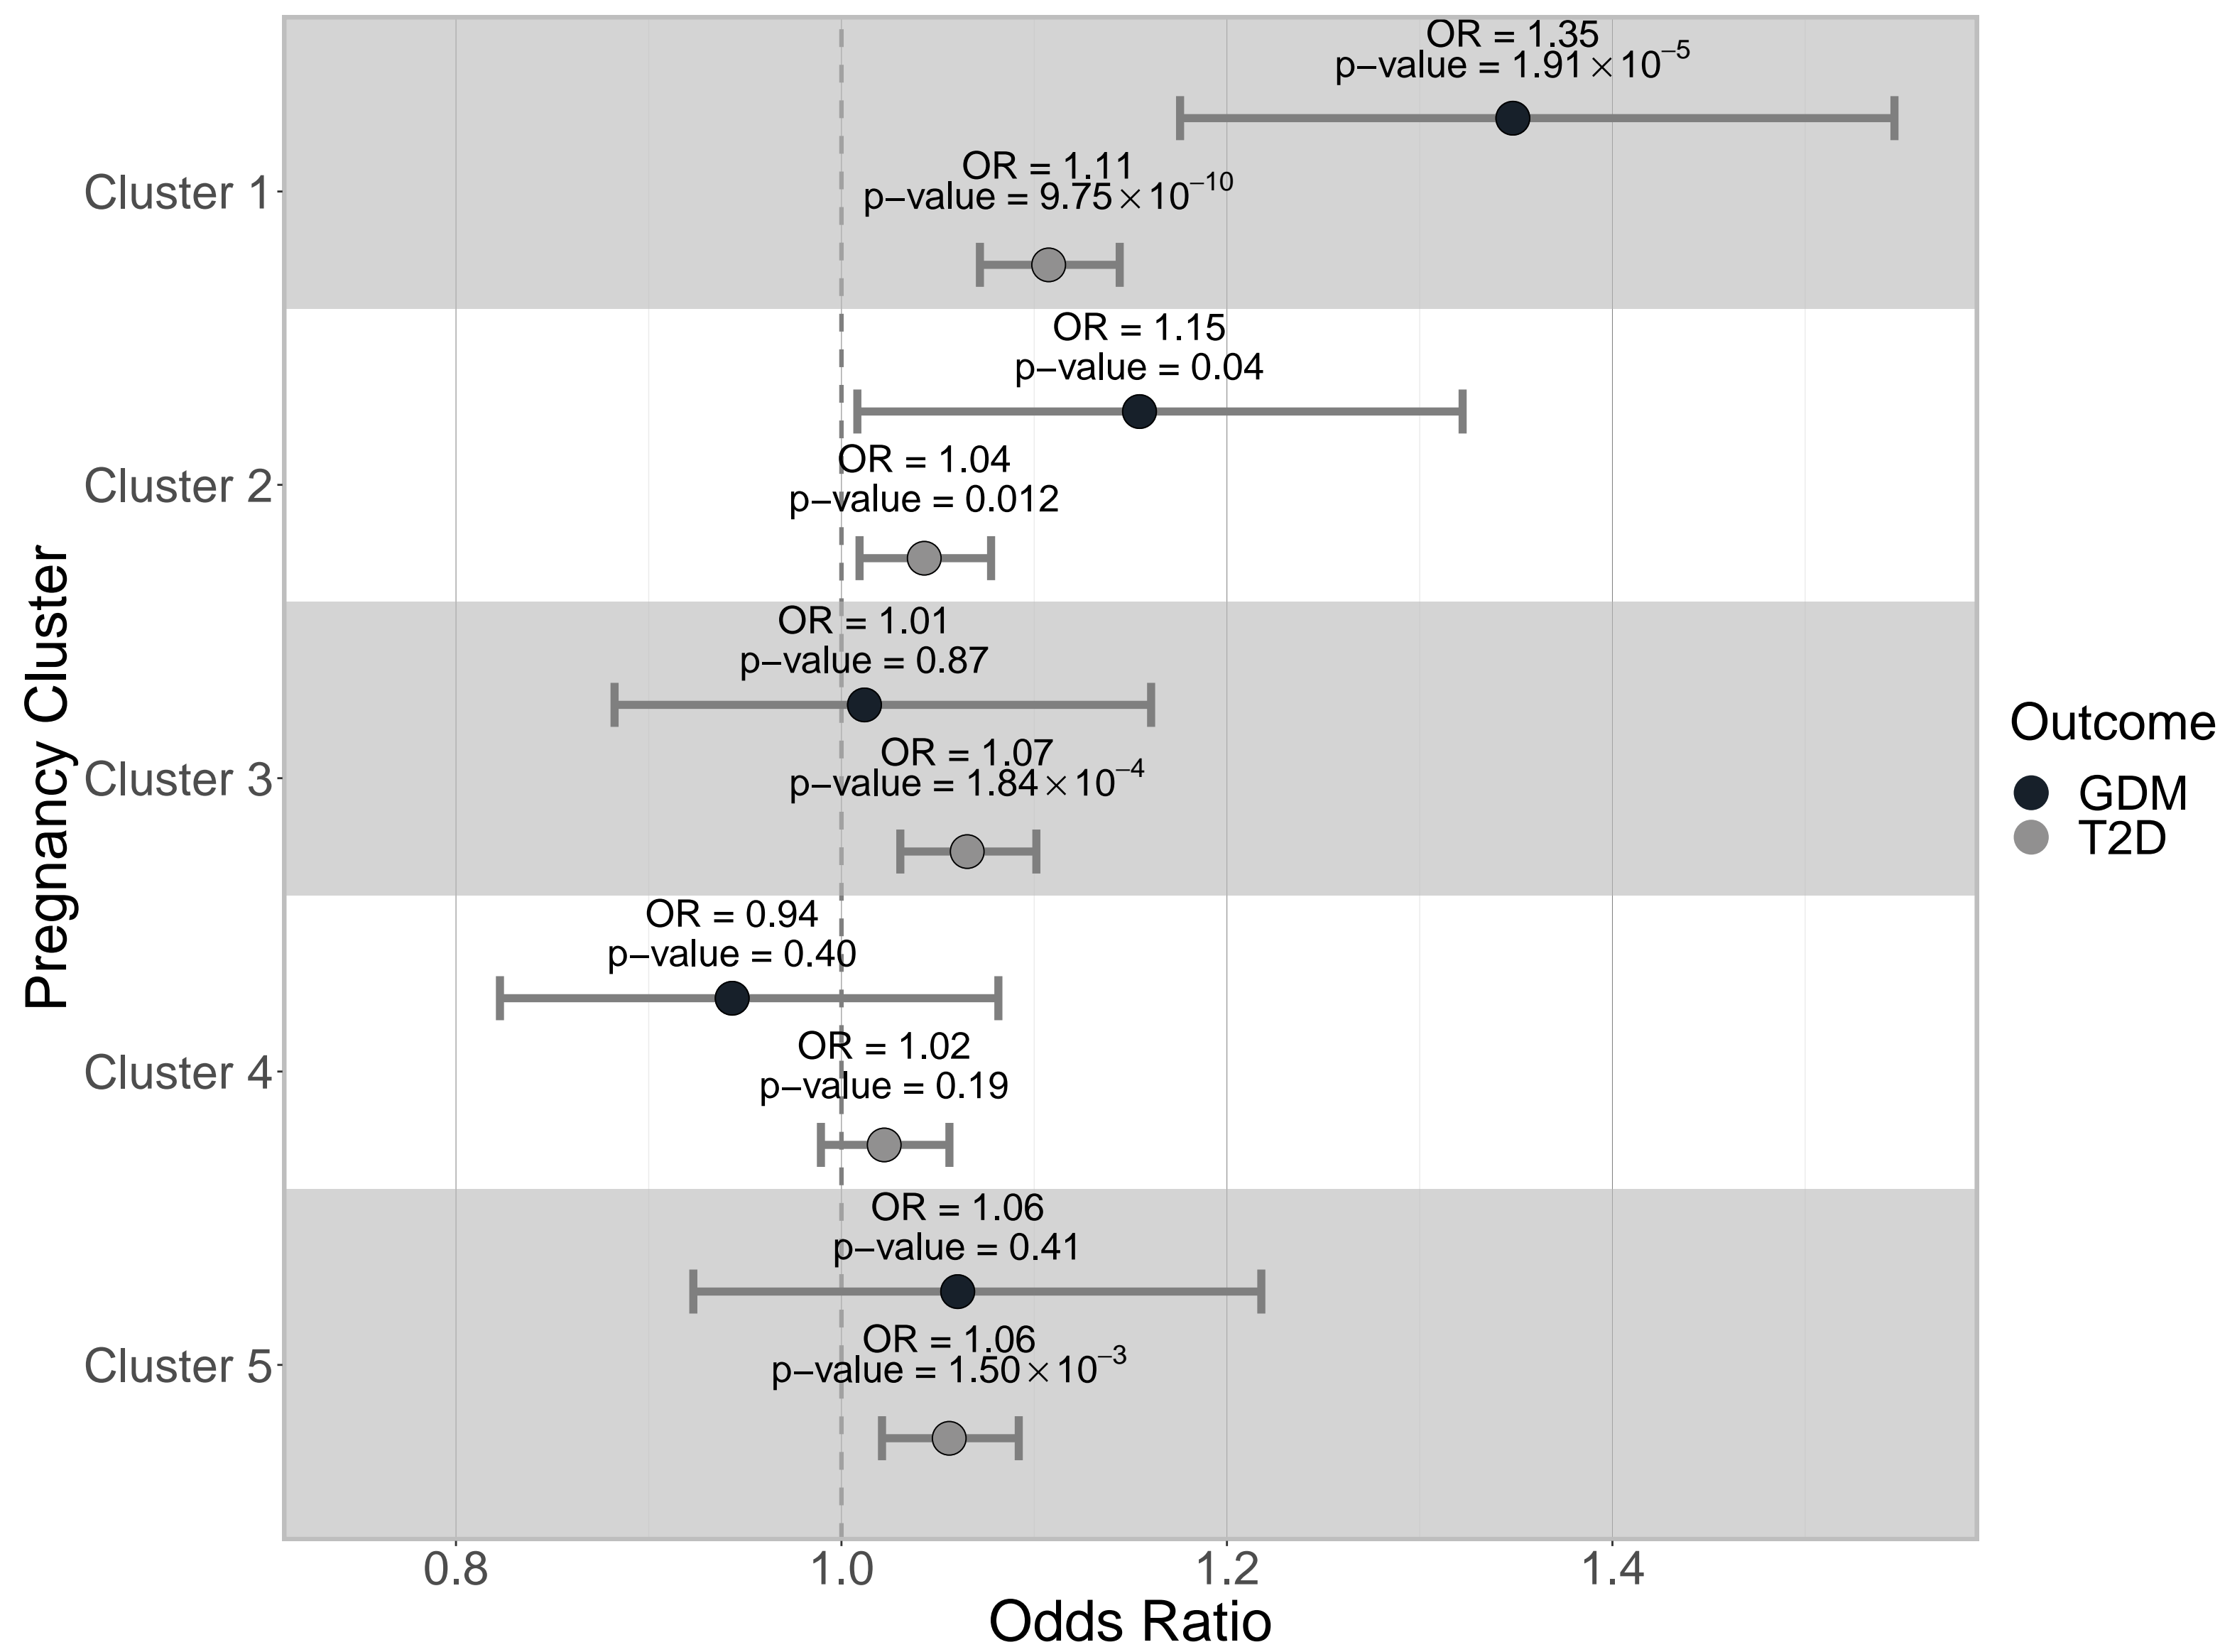

Here we compare the association of each cluster (A: Udder Clusters; B: Pregnancy Clusters) with GDM (presumed European–predominant ancestry meta–analyses) and T2D (from a case–control set of participants in the Partners Biobank). Associations from logistic regression were adjusted for principal components and age. In MGH<sup>2</sup> and Partners Biobank we also adjusted for genotyping/imputation batch. OR=Odds Ratio, depicted by circles. Error bars provide the 95% confidence interval for the OR. P–values < 0.01 were considered statistically significant.
